# Supplementary material for: Comparative transcriptomic analysis provides insight into carpel petaloidy in lotus (Nelumbo nucifera)
Source: PeerJ. 2021 Oct 25;9:e12322. doi: 10.7717/peerj.12322 (PMC8552788; doi:10.7717/peerj.12322)
Supplement: Supplemental Information 9 [file peerj-09-12322-s009.xlsx]

## Sheet: Table S3 All genes annotations
#GeneID	COG_class	COG_class_annotation	GO_annotation	KEGG_annotation	KEGG_pathway_annotation	KOG_class	KOG_class_annotation	Pfam_annotation	Swiss-Prot_annotation	eggNOG_class	eggNOG_class_annotation	NR_annotation
Nn2g15087	--		Molecular Function: protein kinase activity (GO:0004672);; Molecular Function: ATP binding (GO:0005524);; Cellular Component: integral component of membrane (GO:0016021);; Molecular Function: polysaccharide binding (GO:0030247);;	K13416|8.8e-50|mdm:103416332|K13416 brassinosteroid insensitive 1-associated receptor kinase 1 [EC:2.7.10.1 2.7.11.1] | (RefSeq) BRASSINOSTEROID INSENSITIVE 1-associated receptor kinase 1-like isoform X1	MAPK signaling pathway - plant (ko04016);; Plant hormone signal transduction (ko04075);; Plant-pathogen interaction (ko04626)	[T]	Signal transduction mechanisms	Protein kinase domain	Rust resistance kinase Lr10 OS=Triticum aestivum OX=4565 GN=LRK10 PE=2 SV=1	T	Signal transduction mechanisms	PREDICTED: rust resistance kinase Lr10-like isoform X1 [Nelumbo nucifera]
Nn1g08393	--	--	--	K00817|1.7e-11|lang:109325818|K00817 histidinol-phosphate aminotransferase [EC:2.6.1.9] | (RefSeq) histidinol-phosphate aminotransferase, chloroplastic	Histidine metabolism (ko00340);; Tyrosine metabolism (ko00350);; Phenylalanine metabolism (ko00360);; Phenylalanine, tyrosine and tryptophan biosynthesis (ko00400);; Tropane, piperidine and pyridine alkaloid biosynthesis (ko00960);; Biosynthesis of amino acids (ko01230)	--	--	--	--	--	--	PREDICTED: uncharacterized protein LOC104596769 [Nelumbo nucifera]
Nn5g29632	[L]	Replication, recombination and repair	Molecular Function: catalytic activity (GO:0003824);; Biological Process: base-excision repair (GO:0006284);;	K01247|2.0e-231|nnu:104595671|K01247 DNA-3-methyladenine glycosylase II [EC:3.2.2.21] | (RefSeq) uncharacterized LOC104595671	Base excision repair (ko03410)	[L]	Replication, recombination and repair	HhH-GPD superfamily base excision DNA repair protein	--	L	Replication, recombination and repair	PREDICTED: uncharacterized protein LOC104595671 isoform X1 [Nelumbo nucifera]
Nn4g25114	--	--	Molecular Function: transcription factor activity, sequence-specific DNA binding (GO:0003700);;	K16221|6.7e-18|nnu:104589565|K16221 transcription factor TCP21 (protein CCA1 HIKING EXPEDITION) | (RefSeq) transcription factor TCP7-like	Circadian rhythm - plant (ko04712)	--	--	--	--	K	Transcription	PREDICTED: transcription factor TCP7-like [Nelumbo nucifera]
Nn8g40745	--	--	--	--	--	--	--	--	--	S	Function unknown	uncharacterized protein LOC114755375 [Prosopis alba]
Nn3g17990	[H]	Coenzyme transport and metabolism	Molecular Function: tetrahydrofolylpolyglutamate synthase activity (GO:0004326);; Molecular Function: ATP binding (GO:0005524);;	K20457|0.0e+00|nnu:104592271|K20457 dihydrofolate synthase [EC:6.3.2.12] | (RefSeq) dihydrofolate synthetase	Folate biosynthesis (ko00790)	[H]	Coenzyme transport and metabolism	Mur ligase middle domain	Dihydrofolate synthetase OS=Arabidopsis thaliana OX=3702 GN=DHFS PE=1 SV=1	H	Coenzyme transport and metabolism	PREDICTED: dihydrofolate synthetase isoform X1 [Nelumbo nucifera]
Nn5g28027	--	--	Molecular Function: protein serine/threonine kinase activity (GO:0004674);; Molecular Function: ATP binding (GO:0005524);; Cellular Component: integral component of membrane (GO:0016021);; Molecular Function: polysaccharide binding (GO:0030247);;	--	--	--	--	Wall-associated kinase	--	S	Function unknown	PREDICTED: putative wall-associated receptor kinase-like 16 [Nelumbo nucifera]
Nn4g22335	[MR]	Cell wall/membrane/envelope biogenesis;; General function prediction only	Molecular Function: racemase and epimerase activity, acting on amino acids and derivatives (GO:0016855);; Molecular Function: metal ion binding (GO:0046872);;	--	--	--	--	--	L-Ala-D/L-amino acid epimerase OS=Populus trichocarpa OX=3694 GN=POPTR_0012s05040g PE=3 SV=2	M	Cell wall/membrane/envelope biogenesis	PREDICTED: L-Ala-D/L-amino acid epimerase isoform X1 [Nelumbo nucifera]
Nn105s43184	--	--	--	--	--	--	--	--	--	S	Function unknown	hypothetical protein GOBAR_AA32096 [Gossypium barbadense]
Nelumbo_nucifera_newGene_1025	--	--	Molecular Function: transaminase activity (GO:0008483);; Biological Process: biosynthetic process (GO:0009058);; Molecular Function: pyridoxal phosphate binding (GO:0030170);;	K14272|4.3e-08|zma:100284842|K14272 glutamate--glyoxylate aminotransferase [EC:2.6.1.4 2.6.1.2 2.6.1.44] | (RefSeq) uncharacterized protein LOC100284842	Arginine biosynthesis (ko00220);; Alanine, aspartate and glutamate metabolism (ko00250);; Glycine, serine and threonine metabolism (ko00260);; Glyoxylate and dicarboxylate metabolism (ko00630);; Carbon fixation in photosynthetic organisms (ko00710);; Carbon metabolism (ko01200);; 2-Oxocarboxylic acid metabolism (ko01210);; Biosynthesis of amino acids (ko01230)	[E]	Amino acid transport and metabolism	--	Glutamate--glyoxylate aminotransferase 2 OS=Arabidopsis thaliana OX=3702 GN=GGAT2 PE=1 SV=1	--	--	PREDICTED: LOW QUALITY PROTEIN: glutamate--glyoxylate aminotransferase 2 [Nelumbo nucifera]
Nn1g03519	--	--	--	--	--	--	--	--	--	--	--	PREDICTED: uncharacterized protein LOC104610934 [Nelumbo nucifera]
Nn2g14883	--	--	Cellular Component: integral component of membrane (GO:0016021);;	--	--	[S]	Function unknown	Reactive mitochondrial oxygen species modulator 1	--	S	Function unknown	PREDICTED: reactive oxygen species modulator 1-like [Nelumbo nucifera]
Nn2g10818	--	--	Molecular Function: sulfotransferase activity (GO:0008146);; Cellular Component: integral component of membrane (GO:0016021);;	K22218|2.8e-111|nnu:104594871|K22218 protein-tyrosine sulfotransferase [EC:2.8.2.20] | (RefSeq) protein-tyrosine sulfotransferase	--	--	--	Sulfotransferase domain	Protein-tyrosine sulfotransferase OS=Arabidopsis thaliana OX=3702 GN=TPST PE=1 SV=3	S	Function unknown	PREDICTED: protein-tyrosine sulfotransferase isoform X1 [Nelumbo nucifera]
Nn1g06187	[T]	Signal transduction mechanisms	Molecular Function: protein serine/threonine kinase activity (GO:0004674);; Molecular Function: ATP binding (GO:0005524);; Cellular Component: integral component of membrane (GO:0016021);;	K00924|1.4e-76|smo:SELMODRAFT_165220|K00924 kinase [EC:2.7.1.-] | (RefSeq) hypothetical protein	--	--	--	Leucine rich repeat	Receptor-like protein kinase 2 OS=Arabidopsis thaliana OX=3702 GN=RCH2 PE=1 SV=1	T	Signal transduction mechanisms	PREDICTED: LRR receptor-like serine/threonine-protein kinase RCH1 [Nelumbo nucifera]
Nn5g28696	--	--	Molecular Function: serine-type endopeptidase activity (GO:0004252);;	--	--	--	--	Fibronectin type-III domain	--	O	Posttranslational modification, protein turnover, chaperones	PREDICTED: subtilisin-like protease SBT4.14 [Nelumbo nucifera]
Nn3g18958	[J]	Translation, ribosomal structure and biogenesis	Molecular Function: structural constituent of ribosome (GO:0003735);; Cellular Component: ribosome (GO:0005840);; Biological Process: translation (GO:0006412);; Molecular Function: rRNA binding (GO:0019843);;	K02990|2.8e-112|nnu:104604044|K02990 small subunit ribosomal protein S6 | (RefSeq) 30S ribosomal protein S6 alpha, chloroplastic	Ribosome (ko03010)	--	--	Ribosomal protein S6	30S ribosomal protein S6 alpha, chloroplastic OS=Arabidopsis thaliana OX=3702 GN=RPS6 PE=2 SV=1	J	Translation, ribosomal structure and biogenesis	PREDICTED: 30S ribosomal protein S6 alpha, chloroplastic isoform X1 [Nelumbo nucifera]
Nn3g18812	--	--	Molecular Function: transcription cofactor activity (GO:0003712);; Biological Process: regulation of transcription from RNA polymerase II promoter (GO:0006357);; Cellular Component: mediator complex (GO:0016592);;	K15151|6.2e-81|nnu:104593484|K15151 mediator of RNA polymerase II transcription subunit 10 | (RefSeq) mediator of RNA polymerase II transcription subunit 10b-like	--	[K]	Transcription	Transcription factor subunit Med10 of Mediator complex	Mediator of RNA polymerase II transcription subunit 10b OS=Arabidopsis thaliana OX=3702 GN=MED10B PE=1 SV=1	K	Transcription	PREDICTED: mediator of RNA polymerase II transcription subunit 10b-like [Nelumbo nucifera]
Nn3g17046	[C]	Energy production and conversion	Molecular Function: pyruvate dehydrogenase (acetyl-transferring) activity (GO:0004739);; Biological Process: acetyl-CoA biosynthetic process from pyruvate (GO:0006086);; Cellular Component: intracellular membrane-bounded organelle (GO:0043231);;	K00161|2.1e-227|nnu:104596102|K00161 pyruvate dehydrogenase E1 component alpha subunit [EC:1.2.4.1] | (RefSeq) pyruvate dehydrogenase E1 component subunit alpha, mitochondrial-like	Glycolysis / Gluconeogenesis (ko00010);; Citrate cycle (TCA cycle) (ko00020);; Pyruvate metabolism (ko00620);; Carbon metabolism (ko01200)	[C]	Energy production and conversion	Dehydrogenase E1 component	Pyruvate dehydrogenase E1 component subunit alpha, mitochondrial OS=Solanum tuberosum OX=4113 PE=1 SV=1	C	Energy production and conversion	PREDICTED: pyruvate dehydrogenase E1 component subunit alpha, mitochondrial-like [Nelumbo nucifera]
Nn3g20659	[J]	Translation, ribosomal structure and biogenesis	Biological Process: pseudouridine synthesis (GO:0001522);; Molecular Function: RNA binding (GO:0003723);; Molecular Function: pseudouridine synthase activity (GO:0009982);;	K06180|3.6e-138|nnu:104585965|K06180 23S rRNA pseudouridine1911/1915/1917 synthase [EC:5.4.99.23] | (RefSeq) RNA pseudouridine synthase 2, chloroplastic	--	[A]	RNA processing and modification	RNA pseudouridylate synthase	RNA pseudouridine synthase 2, chloroplastic OS=Oryza sativa subsp. japonica OX=39947 GN=Os06g0717400 PE=2 SV=1	A	RNA processing and modification	PREDICTED: RNA pseudouridine synthase 2, chloroplastic isoform X2 [Nelumbo nucifera]
Nn1g04187	--	--	Cellular Component: integral component of membrane (GO:0016021);;	K21435|7.2e-31|var:108322980|K21435 ankyrin repeat domain-containing protein 6 | (RefSeq) ankyrin repeat-containing protein At3g12360-like	--	[R]	General function prediction only	Ankyrin repeats (3 copies)	--	S	Function unknown	PREDICTED: ankyrin repeat-containing protein ITN1-like [Nelumbo nucifera]
Nn6g34727	--	--	Cellular Component: integral component of membrane (GO:0016021);;	--	--	--	--	Late embryogenesis abundant protein	NDR1/HIN1-like protein 10 OS=Arabidopsis thaliana OX=3702 GN=NHL10 PE=2 SV=1	S	Function unknown	PREDICTED: protein YLS9-like [Nelumbo nucifera]
Nn2g11180	--	--	--	K12173|8.1e-31|gmx:100794341|K12173 BRCA1-A complex subunit BRE | (RefSeq) BRISC and BRCA1-A complex member 2	Homologous recombination (ko03440)	--	--	Thaumatin family	Thaumatin-like protein OS=Oryza sativa subsp. japonica OX=39947 GN=Os11g0706600 PE=2 SV=1	S	Function unknown	PREDICTED: thaumatin-like protein [Nelumbo nucifera]
Nn1g04917	--	--	Molecular Function: hydrolase activity, hydrolyzing O-glycosyl compounds (GO:0004553);; Biological Process: carbohydrate metabolic process (GO:0005975);;	K12309|1.1e-09|ath:AT3G52840|K12309 beta-galactosidase [EC:3.2.1.23] | (RefSeq) BGAL2; beta-galactosidase 2	Galactose metabolism (ko00052);; Other glycan degradation (ko00511);; Glycosaminoglycan degradation (ko00531);; Sphingolipid metabolism (ko00600);; Glycosphingolipid biosynthesis - ganglio series (ko00604)	[G]	Carbohydrate transport and metabolism	Glycosyl hydrolases family 35	Beta-galactosidase 2 OS=Arabidopsis thaliana OX=3702 GN=BGAL2 PE=2 SV=2	--	--	Beta-galactosidase 4 [Vitis vinifera]
Nn4g24647	--	--	Molecular Function: transcription cofactor activity (GO:0003712);; Molecular Function: histone acetyltransferase activity (GO:0004402);; Biological Process: regulation of transcription, DNA-templated (GO:0006355);; Molecular Function: zinc ion binding (GO:0008270);; Cellular Component: host cell nucleus (GO:0042025);;	K04498|1.2e-91|nnu:104612622|K04498 E1A/CREB-binding protein [EC:2.3.1.48] | (RefSeq) histone acetyltransferase HAC1-like	--	[K]	Transcription	TAZ zinc finger	Histone acetyltransferase HAC12 OS=Arabidopsis thaliana OX=3702 GN=HAC12 PE=3 SV=2	K	Transcription	PREDICTED: histone acetyltransferase HAC1-like [Nelumbo nucifera]
Nn5g28383	[M]	Cell wall/membrane/envelope biogenesis	Molecular Function: protein kinase activity (GO:0004672);; Molecular Function: ATP binding (GO:0005524);; Cellular Component: integral component of membrane (GO:0016021);;	K23544|3.1e-82|brp:103842861|K23544 serine incorporator 1/3 | (RefSeq) serine incorporator 3	--	--	--	Protein kinase domain	Wall-associated receptor kinase-like 2 OS=Arabidopsis thaliana OX=3702 GN=WAKL2 PE=2 SV=1	T	Signal transduction mechanisms	PREDICTED: wall-associated receptor kinase-like 10 [Nelumbo nucifera]
Nn2g13635	--	--	--	K15235|9.6e-20|tcc:18590530|K15235 josephin [EC:3.4.19.12] | (RefSeq) josephin-like protein	--	[R]	General function prediction only	--	--	S	Function unknown	PREDICTED: josephin-like protein [Vitis vinifera]
Nn8g40079	--	--	Biological Process: regulation of flower development (GO:0009909);;	--	--	--	--	--	Protein HEADING DATE REPRESSOR 1 OS=Oryza sativa subsp. indica OX=39946 GN=HDR1 PE=3 SV=1	--	--	PREDICTED: uncharacterized protein LOC104609194 [Nelumbo nucifera]
Nn1g01320	--	--	Molecular Function: magnesium ion binding (GO:0000287);; Molecular Function: electron carrier activity (GO:0009055);; Cellular Component: photosystem I (GO:0009522);; Cellular Component: plastid (GO:0009536);; Biological Process: photosynthesis (GO:0015979);; Cellular Component: integral component of membrane (GO:0016021);; Molecular Function: chlorophyll binding (GO:0016168);; Biological Process…	K02689|8.1e-63|nnu:10743882|K02689 photosystem I P700 chlorophyll a apoprotein A1 | (RefSeq) psaA, N623_p065; photosystem I P700 apoprotein A1	Photosynthesis (ko00195)	--	--	Photosystem I psaA/psaB protein	Photosystem I P700 chlorophyll a apoprotein A1 OS=Drimys granadensis OX=224735 GN=psaA PE=3 SV=1	C	Energy production and conversion	photosystem I P700 chlorophy11 A apoprotein A1 [Adenophora remotiflora]
Nn4g23385	[J]	Translation, ribosomal structure and biogenesis	Molecular Function: structural constituent of ribosome (GO:0003735);; Cellular Component: ribosome (GO:0005840);; Biological Process: translation (GO:0006412);;	K02966|1.5e-20|nnu:104597979|K02966 small subunit ribosomal protein S19e | (RefSeq) 40S ribosomal protein S19-3	Ribosome (ko03010)	[J]	Translation, ribosomal structure and biogenesis	Ribosomal protein S19e	40S ribosomal protein S19-3 OS=Arabidopsis thaliana OX=3702 GN=RPS19C PE=2 SV=1	J	Translation, ribosomal structure and biogenesis	PREDICTED: 40S ribosomal protein S19-3-like [Nelumbo nucifera]
Nn4g23336	--	--	Cellular Component: ubiquitin ligase complex (GO:0000151);; Biological Process: ubiquitin-dependent protein catabolic process (GO:0006511);; Molecular Function: ubiquitin-ubiquitin ligase activity (GO:0034450);;	K10597|0.0e+00|nnu:104598018|K10597 ubiquitin conjugation factor E4 B [EC:2.3.2.27] | (RefSeq) probable ubiquitin conjugation factor E4	Ubiquitin mediated proteolysis (ko04120);; Protein processing in endoplasmic reticulum (ko04141)	[O]	Posttranslational modification, protein turnover, chaperones	Ubiquitin elongating factor core	Probable ubiquitin conjugation factor E4 OS=Arabidopsis thaliana OX=3702 GN=PUB1 PE=2 SV=1	O	Posttranslational modification, protein turnover, chaperones	PREDICTED: probable ubiquitin conjugation factor E4 [Nelumbo nucifera]
Nn4g22674	--	--	--	--	--	[I]	Lipid transport and metabolism	CRAL/TRIO domain	--	I	Lipid transport and metabolism	PREDICTED: motile sperm domain-containing protein 2 [Nelumbo nucifera]
Nn010s41437	--	--	Cellular Component: chloroplast inner membrane (GO:0009706);; Molecular Function: hydrogen ion transmembrane transporter activity (GO:0015078);; Cellular Component: integral component of membrane (GO:0016021);;	K02634|7.9e-19|cann:107858750|K02634 apocytochrome f | (RefSeq) cytochrome f-like	Photosynthesis (ko00195)	--	--	CemA family	Chloroplast envelope membrane protein OS=Platanus occidentalis OX=4403 GN=cemA PE=3 SV=1	U	Intracellular trafficking, secretion, and vesicular transport	chloroplast envelope membrane protein [Nelumbo lutea]
Nn1g07051	--	--	Molecular Function: protein binding (GO:0005515);; Cellular Component: integral component of membrane (GO:0016021);;	--	--	--	--	Leucine Rich repeats (2 copies)	--	S	Function unknown	LOW QUALITY PROTEIN: receptor-like protein 46 [Quercus lobata]
Nn3g17219	--	--	Molecular Function: DNA binding (GO:0003677);; Cellular Component: nuclear origin of replication recognition complex (GO:0005664);; Biological Process: DNA replication (GO:0006260);;	K02608|1.1e-159|nnu:104597419|K02608 origin recognition complex subunit 6 | (RefSeq) origin of replication complex subunit 6	--	[L]	Replication, recombination and repair	Origin recognition complex subunit 6 (ORC6)	Origin of replication complex subunit 6 OS=Oryza sativa subsp. indica OX=39946 GN=OsI_26966 PE=3 SV=1	L	Replication, recombination and repair	PREDICTED: origin of replication complex subunit 6 [Nelumbo nucifera]
Nn2g10856	[M]	Cell wall/membrane/envelope biogenesis	Molecular Function: protein kinase activity (GO:0004672);; Molecular Function: calcium ion binding (GO:0005509);; Molecular Function: ATP binding (GO:0005524);;	K13412|6.5e-202|nnu:104594903|K13412 calcium-dependent protein kinase [EC:2.7.11.1] | (RefSeq) calcium-dependent protein kinase 13	Plant-pathogen interaction (ko04626)	[T]	Signal transduction mechanisms	Protein kinase domain	Calcium-dependent protein kinase 13 OS=Arabidopsis thaliana OX=3702 GN=CPK13 PE=1 SV=2	T	Signal transduction mechanisms	PREDICTED: calcium-dependent protein kinase 13 [Nelumbo nucifera]
Nn3g17795	--	--	Cellular Component: protein phosphatase type 2A complex (GO:0000159);; Biological Process: response to acid chemical (GO:0001101);; Molecular Function: protein binding (GO:0005515);; Cellular Component: cellular_component (GO:0005575);; Cellular Component: cell wall (GO:0005618);; Cellular Component: intracellular (GO:0005622);; Cellular Component: cell (GO:0005623);; Cellular Component: nucleus …	K03456|6.2e-106|nnu:104601618|K03456 serine/threonine-protein phosphatase 2A regulatory subunit A | (RefSeq) serine/threonine-protein phosphatase 2A 65 kDa regulatory subunit A beta isoform	mRNA surveillance pathway (ko03015)	[T]	Signal transduction mechanisms	HEAT repeat	Serine/threonine-protein phosphatase 2A 65 kDa regulatory subunit A beta isoform OS=Arabidopsis thaliana OX=3702 GN=PP2AA2 PE=1 SV=2	T	Signal transduction mechanisms	PREDICTED: serine/threonine-protein phosphatase 2A 65 kDa regulatory subunit A beta isoform [Nelumbo nucifera]
Nn2g12328	--	--	Biological Process: mitotic sister chromatid cohesion (GO:0007064);;	K11267|5.3e-59|tcc:18597347|K11267 sister chromatid cohesion protein PDS5 | (RefSeq) sister chromatid cohesion protein PDS5 homolog A	--	[D]	Cell cycle control, cell division, chromosome partitioning	--	--	D	Cell cycle control, cell division, chromosome partitioning	PREDICTED: micronuclear linker histone polyprotein-like [Nelumbo nucifera]
Nn1g08819	[J]	Translation, ribosomal structure and biogenesis	--	--	--	--	--	Conserved hypothetical protein 95	--	L	Replication, recombination and repair	PREDICTED: uncharacterized protein LOC104608018 [Nelumbo nucifera]
Nn5g29703	--	--	Molecular Function: zinc ion binding (GO:0008270);;	K05849|3.4e-109|ini:109158657|K05849 solute carrier family 8 (sodium/calcium exchanger) | (RefSeq) pentatricopeptide repeat-containing protein At3g62890-like	--	[R]	General function prediction only	DYW family of nucleic acid deaminases	Pentatricopeptide repeat-containing protein At5g48910 OS=Arabidopsis thaliana OX=3702 GN=PCMP-H38 PE=2 SV=1	S	Function unknown	PREDICTED: pentatricopeptide repeat-containing protein At4g21065-like [Nelumbo nucifera]
Nn2g12181	--	--	Molecular Function: ATP binding (GO:0005524);;	K10875|1.7e-72|nnu:104607713|K10875 DNA repair and recombination protein RAD54 and RAD54-like protein [EC:3.6.4.-] | (RefSeq) SNF2 domain-containing protein CLASSY 1-like	Homologous recombination (ko03440)	[L]	Replication, recombination and repair	--	SNF2 domain-containing protein CLASSY 1 OS=Arabidopsis thaliana OX=3702 GN=CLSY1 PE=1 SV=1	L	Replication, recombination and repair	PREDICTED: SNF2 domain-containing protein CLASSY 1-like [Nelumbo nucifera]
Nn220s45309	--	--	--	--	--	--	--	--	--	--	--	hypothetical protein CSA_004614 [Cucumis sativus]
Nn5g28425	--	--	Cellular Component: cellular_component (GO:0005575);; Cellular Component: intracellular (GO:0005622);; Cellular Component: cell (GO:0005623);; Cellular Component: cytoplasm (GO:0005737);; Cellular Component: cytosol (GO:0005829);; Cellular Component: plasma membrane (GO:0005886);; Biological Process: transport (GO:0006810);; Biological Process: endocytosis (GO:0006897);; Biological Process: recep…	--	--	[R]	General function prediction only	--	Auxilin-related protein 1 OS=Arabidopsis thaliana OX=3702 GN=AUXI1 PE=1 SV=2	S	Function unknown	PREDICTED: auxilin-related protein 2-like [Nelumbo nucifera]
Nn6g34386	[R]	General function prediction only	--	K01094|2.9e-207|nnu:104608394|K01094 phosphatidylglycerophosphatase GEP4 [EC:3.1.3.27] | (RefSeq) uncharacterized LOC104608394	Glycerophospholipid metabolism (ko00564)	[R]	General function prediction only	Mitochondrial PGP phosphatase	Phosphatidylglycerophosphate phosphatase 1, chloroplastic/mitochondrial OS=Arabidopsis thaliana OX=3702 GN=PGPP1 PE=1 SV=1	S	Function unknown	PREDICTED: uncharacterized protein LOC104608394 isoform X1 [Nelumbo nucifera]
Nn1g04944	--	--	Molecular Function: catechol oxidase activity (GO:0004097);; Cellular Component: integral component of membrane (GO:0016021);; Biological Process: pigment biosynthetic process (GO:0046148);; Molecular Function: metal ion binding (GO:0046872);;	K00422|0.0e+00|nnu:104601839|K00422 polyphenol oxidase [EC:1.10.3.1] | (RefSeq) aureusidin synthase-like	Tyrosine metabolism (ko00350);; Isoquinoline alkaloid biosynthesis (ko00950)	--	--	Protein of unknown function (DUF_B2219)	Aureusidin synthase OS=Antirrhinum majus OX=4151 GN=AS1 PE=1 SV=1	S	Function unknown	PREDICTED: aureusidin synthase-like [Nelumbo nucifera]
Nn1g03073	--	--	Molecular Function: transferase activity (GO:0016740);;	K00799|1.3e-18|nnu:104587641|K00799 glutathione S-transferase [EC:2.5.1.18] | (RefSeq) probable glutathione S-transferase	Glutathione metabolism (ko00480)	--	--	--	--	O	Posttranslational modification, protein turnover, chaperones	PREDICTED: probable glutathione S-transferase [Nelumbo nucifera]
Nn1g01397	--	--	--	--	--	--	--	--	--	--	--	PREDICTED: uncharacterized protein LOC104598005 [Nelumbo nucifera]
Nn1g01414	--	--	Biological Process: immune system process (GO:0002376);; Cellular Component: cellular_component (GO:0005575);; Cellular Component: extracellular region (GO:0005576);; Cellular Component: intracellular (GO:0005622);; Cellular Component: cell (GO:0005623);; Cellular Component: cytoplasm (GO:0005737);; Biological Process: response to stress (GO:0006950);; Biological Process: defense response (GO:000…	K12173|5.1e-24|gmx:100794341|K12173 BRCA1-A complex subunit BRE | (RefSeq) BRISC and BRCA1-A complex member 2	Homologous recombination (ko03440)	--	--	Thaumatin family	Thaumatin-like protein OS=Olea europaea OX=4146 PE=1 SV=1	S	Function unknown	PREDICTED: protein P21 [Nelumbo nucifera]
Nn8g40290	--	--	Biological Process: reproduction (GO:0000003);; Biological Process: response to acid chemical (GO:0001101);; Biological Process: developmental process involved in reproduction (GO:0003006);; Cellular Component: cellular_component (GO:0005575);; Cellular Component: intracellular (GO:0005622);; Cellular Component: cell (GO:0005623);; Cellular Component: cytoplasm (GO:0005737);; Cellular Component: …	K12493|1.2e-76|nnu:104586714|K12493 ADP-ribosylation factor GTPase-activating protein 2/3 | (RefSeq) probable ADP-ribosylation factor GTPase-activating protein AGD8	Endocytosis (ko04144)	[T]	Signal transduction mechanisms	--	Probable ADP-ribosylation factor GTPase-activating protein AGD8 OS=Arabidopsis thaliana OX=3702 GN=AGD8 PE=1 SV=1	T	Signal transduction mechanisms	PREDICTED: probable ADP-ribosylation factor GTPase-activating protein AGD8, partial [Nelumbo nucifera]
Nn2g15279	--	--	--	--	--	--	--	--	--	--	--	hypothetical protein BVC80_9055g9 [Macleaya cordata]
Nn8g41156	--	--	--	K08248|4.5e-23|zju:107414194|K08248 (R)-mandelonitrile lyase [EC:4.1.2.10] | (RefSeq) (R)-mandelonitrile lyase 1-like	Cyanoamino acid metabolism (ko00460)	[R]	General function prediction only	gag-polypeptide of LTR copia-type	--	L	Replication, recombination and repair	Retrovirus-related Pol polyprotein from transposon TNT 1-94 [Cucumis melo var. makuwa]
Nn4g25953	--	--	Molecular Function: DNA binding (GO:0003677);; Molecular Function: transcription factor activity, sequence-specific DNA binding (GO:0003700);; Cellular Component: nucleus (GO:0005634);;	K09286|5.3e-28|nnu:104592717|K09286 EREBP-like factor | (RefSeq) ethylene-responsive transcription factor LEP-like	--	--	--	AP2 domain	Ethylene-responsive transcription factor ERF086 OS=Arabidopsis thaliana OX=3702 GN=ERF086 PE=1 SV=2	K	Transcription	PREDICTED: ethylene-responsive transcription factor LEP-like [Nelumbo nucifera]
Nn4g23070	[C]	Energy production and conversion	Molecular Function: oxidoreductase activity, acting on the aldehyde or oxo group of donors, NAD or NADP as acceptor (GO:0016620);;	K00294|1.4e-306|nnu:104586749|K00294 1-pyrroline-5-carboxylate dehydrogenase [EC:1.2.1.88] | (RefSeq) probable aldehyde dehydrogenase	Alanine, aspartate and glutamate metabolism (ko00250);; Arginine and proline metabolism (ko00330)	[C]	Energy production and conversion	Aldehyde dehydrogenase family	Probable aldehyde dehydrogenase OS=Linum usitatissimum OX=4006 GN=FIS1 PE=2 SV=1	C	Energy production and conversion	PREDICTED: probable aldehyde dehydrogenase [Nelumbo nucifera]
Nn3g21929	--	--	--	--	--	--	--	--	--	S	Function unknown	PREDICTED: uncharacterized protein LOC104607157 [Nelumbo nucifera]
Nn2g12886	--	--	--	--	--	--	--	Protein of unknown function (DUF1635)	--	S	Function unknown	PREDICTED: uncharacterized protein LOC104599278 [Nelumbo nucifera]
Nn127s43691	--	--	--	--	--	--	--	--	--	--	--	hypothetical protein LR48_Vigan05g084500 [Vigna angularis]
Nn1g08142	[G]	Carbohydrate transport and metabolism	Molecular Function: UDP-glycosyltransferase activity (GO:0008194);;	K13692|1.2e-123|crb:17879960|K13692 UDP-glucose:(indol-3-yl)acetate beta-D-glucosyltransferase [EC:2.4.1.121] | (RefSeq) UDP-glycosyltransferase 75D1	--	[GC]	Carbohydrate transport and metabolism;; Energy production and conversion	UDP-glucoronosyl and UDP-glucosyl transferase	UDP-glycosyltransferase 75C1 OS=Solanum lycopersicum OX=4081 GN=UGT75C1 PE=1 SV=1	--	--	PREDICTED: crocetin glucosyltransferase, chloroplastic-like [Nelumbo nucifera]
Nn3g21109	--	--	Molecular Function: transcription factor activity, sequence-specific DNA binding (GO:0003700);; Cellular Component: nucleus (GO:0005634);; Molecular Function: sequence-specific DNA binding (GO:0043565);;	K13425|1.6e-30|rcu:8286686|K13425 WRKY transcription factor 22 | (RefSeq) WRKY transcription factor 22	MAPK signaling pathway - plant (ko04016);; Plant-pathogen interaction (ko04626)	--	--	WRKY DNA -binding domain	Probable WRKY transcription factor 65 OS=Arabidopsis thaliana OX=3702 GN=WRKY65 PE=2 SV=1	K	Transcription	PREDICTED: probable WRKY transcription factor 65 isoform X2 [Nelumbo nucifera]
Nn8g40669	[P]	Inorganic ion transport and metabolism	Molecular Function: calcium-transporting ATPase activity (GO:0005388);; Molecular Function: calmodulin binding (GO:0005516);; Molecular Function: ATP binding (GO:0005524);; Cellular Component: integral component of membrane (GO:0016021);;	K01537|0.0e+00|nnu:104611393|K01537 P-type Ca2+ transporter type 2C [EC:7.2.2.10] | (RefSeq) calcium-transporting ATPase 10, plasma membrane-type	--	[P]	Inorganic ion transport and metabolism	Cation transporting ATPase, C-terminus	Calcium-transporting ATPase 5, plasma membrane-type OS=Oryza sativa subsp. japonica OX=39947 GN=ACA5 PE=1 SV=2	P	Inorganic ion transport and metabolism	PREDICTED: calcium-transporting ATPase 10, plasma membrane-type [Nelumbo nucifera]
Nn4g25566	--	--	Molecular Function: iron ion transmembrane transporter activity (GO:0005381);; Cellular Component: integral component of membrane (GO:0016021);;	K14685|1.4e-25|ppp:112273634|K14685 solute carrier family 40 (iron-regulated transporter), member 1 | (RefSeq) solute carrier family 40 member 1-like	--	[P]	Inorganic ion transport and metabolism	Ferroportin1 (FPN1)	Solute carrier family 40 member 3, chloroplastic OS=Arabidopsis thaliana OX=3702 GN=IREG3 PE=1 SV=1	P	Inorganic ion transport and metabolism	PREDICTED: solute carrier family 40 member 3, chloroplastic-like isoform X2 [Nelumbo nucifera]
Nn7g35890	--	--	Biological Process: fucose metabolic process (GO:0006004);; Cellular Component: integral component of membrane (GO:0016021);; Molecular Function: transferase activity, transferring glycosyl groups (GO:0016757);;	--	--	--	--	GDP-fucose protein O-fucosyltransferase	--	G	Carbohydrate transport and metabolism	PREDICTED: uncharacterized protein LOC104597650 [Nelumbo nucifera]
Nn6g32493	--	--	--	--	--	--	--	--	--	--	--	Regulator of rDNA transcription protein 15 [Capsicum baccatum]
Nn6g32499	--	--	Molecular Function: monooxygenase activity (GO:0004497);;	--	--	[R]	General function prediction only	--	--	B	Chromatin structure and dynamics	uncharacterized protein LOC111387661 [Olea europaea var. sylvestris]
Nn2g14168	[P]	Inorganic ion transport and metabolism	Molecular Function: carbonate dehydratase activity (GO:0004089);; Molecular Function: zinc ion binding (GO:0008270);;	K01674|5.2e-153|nnu:104607740|K01674 carbonic anhydrase [EC:4.2.1.1] | (RefSeq) alpha carbonic anhydrase 1, chloroplastic-like	Nitrogen metabolism (ko00910)	[R]	General function prediction only	Eukaryotic-type carbonic anhydrase	Alpha carbonic anhydrase 1, chloroplastic OS=Arabidopsis thaliana OX=3702 GN=ACA1 PE=1 SV=2	P	Inorganic ion transport and metabolism	PREDICTED: alpha carbonic anhydrase 1, chloroplastic-like [Nelumbo nucifera]
Nn1g03954	--	--	Cellular Component: cytoplasm (GO:0005737);; Cellular Component: microtubule (GO:0005874);; Molecular Function: microtubule binding (GO:0008017);; Cellular Component: katanin complex (GO:0008352);; Biological Process: microtubule severing (GO:0051013);;	K18643|3.7e-109|nnu:104612577|K18643 katanin p80 WD40 repeat-containing subunit B1 | (RefSeq) katanin p80 WD40 repeat-containing subunit B1 homolog	--	[D]	Cell cycle control, cell division, chromosome partitioning	WD domain, G-beta repeat	Katanin p80 WD40 repeat-containing subunit B1 homolog KTN80.2 OS=Arabidopsis thaliana OX=3702 GN=KTN80.2 PE=1 SV=1	Z	Cytoskeleton	PREDICTED: katanin p80 WD40 repeat-containing subunit B1 homolog [Nelumbo nucifera]
Nn6g34477	--	--	Cellular Component: cell wall (GO:0005618);; Molecular Function: manganese ion binding (GO:0030145);; Molecular Function: nutrient reservoir activity (GO:0045735);; Cellular Component: apoplast (GO:0048046);;	--	--	--	--	Cupin	Germin-like protein subfamily T member 2 OS=Arabidopsis thaliana OX=3702 GN=At1g18980 PE=2 SV=1	S	Function unknown	PREDICTED: germin-like protein subfamily T member 2 [Nelumbo nucifera]
Nn1g03059	--	--	Molecular Function: motor activity (GO:0003774);; Molecular Function: actin binding (GO:0003779);; Molecular Function: ATP binding (GO:0005524);; Biological Process: actin filament organization (GO:0007015);; Cellular Component: myosin complex (GO:0016459);;	K10357|0.0e+00|nnu:104587632|K10357 myosin V | (RefSeq) myosin-6-like	--	[Z]	Cytoskeleton	Myosin head (motor domain)	Myosin-6 OS=Arabidopsis thaliana OX=3702 GN=XI-2 PE=1 SV=1	Z	Cytoskeleton	PREDICTED: myosin-6-like [Nelumbo nucifera]
Nn1g00415	--	--	Cellular Component: integral component of membrane (GO:0016021);;	K22985|6.8e-227|nnu:104604667|K22985 G protein-coupled receptor 107 | (RefSeq) protein GPR107-like	--	[T]	Signal transduction mechanisms	Lung seven transmembrane receptor	Protein CANDIDATE G-PROTEIN COUPLED RECEPTOR 7 OS=Arabidopsis thaliana OX=3702 GN=CAND7 PE=2 SV=1	T	Signal transduction mechanisms	PREDICTED: protein GPR107-like [Nelumbo nucifera]
Nn1g01628	[D]	Cell cycle control, cell division, chromosome partitioning	Molecular Function: ATPase activity (GO:0016887);;	K03609|1.5e-186|nnu:104595978|K03609 septum site-determining protein MinD | (RefSeq) putative septum site-determining protein minD homolog, chloroplastic	--	[D]	Cell cycle control, cell division, chromosome partitioning	CobQ/CobB/MinD/ParA nucleotide binding domain	Putative septum site-determining protein minD homolog, chloroplastic OS=Arabidopsis thaliana OX=3702 GN=MIND1 PE=1 SV=1	D	Cell cycle control, cell division, chromosome partitioning	PREDICTED: putative septum site-determining protein minD homolog, chloroplastic [Nelumbo nucifera]
Nn5g30480	--	--	Cellular Component: ubiquitin ligase complex (GO:0000151);; Biological Process: protein polyubiquitination (GO:0000209);; Biological Process: nucleotide-excision repair, DNA damage recognition (GO:0000715);; Molecular Function: molecular_function (GO:0003674);; Molecular Function: nucleic acid binding (GO:0003676);; Molecular Function: DNA binding (GO:0003677);; Molecular Function: damaged DNA bi…	--	--	[T]	Signal transduction mechanisms	WD domain, G-beta repeat	--	T	Signal transduction mechanisms	PREDICTED: uncharacterized protein LOC104607674 isoform X2 [Nelumbo nucifera]
Nn3g19591	--	--	--	--	--	--	--	--	--	S	Function unknown	PREDICTED: uncharacterized protein LOC104594331 [Nelumbo nucifera]
Nn3g17313	--	--	Biological Process: fucose metabolic process (GO:0006004);; Molecular Function: transferase activity, transferring glycosyl groups (GO:0016757);;	K23280|5.3e-292|nnu:104598136|K23280 rhamnogalacturonan I rhamnosyltransferase [EC:2.4.1.351] | (RefSeq) uncharacterized protein At1g04910	--	--	--	GDP-fucose protein O-fucosyltransferase	Rhamnogalacturonan I rhamnosyltransferase 1 OS=Arabidopsis thaliana OX=3702 GN=RRT4 PE=1 SV=1	G	Carbohydrate transport and metabolism	PREDICTED: uncharacterized protein At1g04910 [Nelumbo nucifera]
Nn8g38868	[E]	Amino acid transport and metabolism	Biological Process: histidine biosynthetic process (GO:0000105);; Molecular Function: imidazoleglycerol-phosphate synthase activity (GO:0000107);; Molecular Function: glutaminase activity (GO:0004359);; Biological Process: glutamine metabolic process (GO:0006541);; Cellular Component: chloroplast (GO:0009507);; Molecular Function: oxo-acid-lyase activity (GO:0016833);;	K01663|0.0e+00|nnu:104600724|K01663 imidazole glycerol-phosphate synthase [EC:4.3.2.10] | (RefSeq) imidazole glycerol phosphate synthase hisHF, chloroplastic	Histidine metabolism (ko00340);; Biosynthesis of amino acids (ko01230)	[E]	Amino acid transport and metabolism	Histidine biosynthesis protein	Imidazole glycerol phosphate synthase hisHF, chloroplastic OS=Arabidopsis thaliana OX=3702 GN=HISN4 PE=2 SV=1	E	Amino acid transport and metabolism	PREDICTED: imidazole glycerol phosphate synthase hisHF, chloroplastic [Nelumbo nucifera]
Nn3g16772	[C]	Energy production and conversion	--	--	--	[O]	Posttranslational modification, protein turnover, chaperones	DnaJ domain	Chaperone protein dnaJ C76, chloroplastic OS=Arabidopsis thaliana OX=3702 GN=DJC76 PE=2 SV=1	O	Posttranslational modification, protein turnover, chaperones	PREDICTED: uncharacterized protein LOC104593132, partial [Nelumbo nucifera]
Nn6g35208	--	--	Molecular Function: hydrolase activity (GO:0016787);;	--	--	[V]	Defense mechanisms	alpha/beta hydrolase fold	Probable carboxylesterase 8 OS=Arabidopsis thaliana OX=3702 GN=CXE8 PE=2 SV=1	V	Defense mechanisms	PREDICTED: probable carboxylesterase 9 [Nelumbo nucifera]
Nn6g34843	[Q]	Secondary metabolites biosynthesis, transport and catabolism	Molecular Function: oxidoreductase activity (GO:0016491);; Molecular Function: metal ion binding (GO:0046872);;	K24028|1.1e-49|atr:105420915|K24028 salicylic acid 3-hydroxylase [EC:1.14.11.-] | (RefSeq) protein DMR6-LIKE OXYGENASE 1-like isoform X1	--	[QR]	Secondary metabolites biosynthesis, transport and catabolism;; General function prediction only	2OG-Fe(II) oxygenase superfamily	1-aminocyclopropane-1-carboxylate oxidase homolog 5 OS=Arabidopsis thaliana OX=3702 GN=2A6 PE=2 SV=2	Q	Secondary metabolites biosynthesis, transport and catabolism	PREDICTED: 1-aminocyclopropane-1-carboxylate oxidase homolog 4-like [Nelumbo nucifera]
Nn3g19598	--	--	Cellular Component: cell wall (GO:0005618);; Biological Process: carbohydrate metabolic process (GO:0005975);; Biological Process: arabinogalactan protein metabolic process (GO:0010405);; Molecular Function: polysaccharide binding (GO:0030247);; Molecular Function: raffinose alpha-galactosidase activity (GO:0052692);;	--	--	[G]	Carbohydrate transport and metabolism	--	--	G	Carbohydrate transport and metabolism	Alpha-galactosidase [Ananas comosus]
Nn8g40943	[R]	General function prediction only	Molecular Function: nucleic acid binding (GO:0003676);; Molecular Function: RNA-DNA hybrid ribonuclease activity (GO:0004523);; Biological Process: signal transduction (GO:0007165);; Molecular Function: ADP binding (GO:0043531);;	K00695|2.7e-76|mtr:MTR_6g478030|K00695 sucrose synthase [EC:2.4.1.13] | (RefSeq) sucrose synthase	Starch and sucrose metabolism (ko00500)	--	--	NB-ARC domain	Disease resistance protein RUN1 OS=Vitis rotundifolia OX=103349 GN=RUN1 PE=1 SV=1	S	Function unknown	PREDICTED: TMV resistance protein N-like [Nelumbo nucifera]
Nn6g34437	--	--	Molecular Function: electron carrier activity (GO:0009055);; Molecular Function: protein disulfide oxidoreductase activity (GO:0015035);;	K03676|2.2e-54|nnu:104608428|K03676 glutaredoxin 3 | (RefSeq) monothiol glutaredoxin-S2-like	--	[O]	Posttranslational modification, protein turnover, chaperones	Glutaredoxin	Monothiol glutaredoxin-S2 OS=Arabidopsis thaliana OX=3702 GN=GRXS2 PE=3 SV=1	O	Posttranslational modification, protein turnover, chaperones	PREDICTED: monothiol glutaredoxin-S2-like [Nelumbo nucifera]
Nn1g05162	--	--	Biological Process: negative regulation of transcription, DNA-templated (GO:0045892);;	K03260|2.0e-07|lja:Lj4g3v1989860.1|K03260 translation initiation factor 4G | (RefSeq) Lj4g3v1989860.1; -	RNA transport (ko03013)	[T]	Signal transduction mechanisms	MA3 domain	MA3 DOMAIN-CONTAINING TRANSLATION REGULATORY FACTOR 2 OS=Arabidopsis thaliana OX=3702 GN=MRF2 PE=1 SV=1	T	Signal transduction mechanisms	PREDICTED: uncharacterized protein LOC104587437 [Nelumbo nucifera]
Nn7g35816	--	--	Molecular Function: DNA binding (GO:0003677);; Cellular Component: nucleus (GO:0005634);;	K12580|4.8e-25|aly:110227739|K12580 CCR4-NOT transcription complex subunit 3 | (RefSeq) myb-related protein 1-like isoform X1	RNA degradation (ko03018)	--	--	MYB-CC type transfactor, LHEQLE motif	Myb-related protein 2 OS=Arabidopsis thaliana OX=3702 GN=MYR2 PE=1 SV=1	K	Transcription	PREDICTED: myb-related protein 2-like isoform X1 [Nelumbo nucifera]
Nn5g27197	--	--	Biological Process: reproduction (GO:0000003);; Biological Process: system process (GO:0003008);; Cellular Component: cellular_component (GO:0005575);; Cellular Component: intracellular (GO:0005622);; Cellular Component: cell (GO:0005623);; Cellular Component: nucleus (GO:0005634);; Cellular Component: nuclear envelope (GO:0005635);; Cellular Component: nuclear pore (GO:0005643);; Cellular Compon…	K14320|7.3e-91|nnu:104593947|K14320 aladin | (RefSeq) aladin	RNA transport (ko03013)	[R]	General function prediction only	--	Aladin OS=Arabidopsis thaliana OX=3702 GN=AAAS PE=1 SV=1	S	Function unknown	PREDICTED: aladin isoform X2 [Nelumbo nucifera]
Nn2g12327	[C]	Energy production and conversion	Molecular Function: oxidoreductase activity, acting on the aldehyde or oxo group of donors, NAD or NADP as acceptor (GO:0016620);;	K00131|1.5e-287|nnu:104603324|K00131 glyceraldehyde-3-phosphate dehydrogenase (NADP+) [EC:1.2.1.9] | (RefSeq) NADP-dependent glyceraldehyde-3-phosphate dehydrogenase	Glycolysis / Gluconeogenesis (ko00010);; Pentose phosphate pathway (ko00030);; Carbon metabolism (ko01200)	[C]	Energy production and conversion	Aldehyde dehydrogenase family	NADP-dependent glyceraldehyde-3-phosphate dehydrogenase OS=Nicotiana plumbaginifolia OX=4092 GN=GAPN PE=2 SV=1	C	Energy production and conversion	PREDICTED: NADP-dependent glyceraldehyde-3-phosphate dehydrogenase [Nelumbo nucifera]
Nn6g34979	--	--	--	--	--	--	--	--	--	S	Function unknown	PREDICTED: uncharacterized protein LOC104588119 [Nelumbo nucifera]
Nn6g34340	[M]	Cell wall/membrane/envelope biogenesis	Molecular Function: protein kinase activity (GO:0004672);; Molecular Function: ATP binding (GO:0005524);;	K13417|6.2e-68|bna:111204599|K13417 somatic embryogenesis receptor kinase 4 [EC:2.7.10.1 2.7.11.1] | (RefSeq) somatic embryogenesis receptor kinase 4-like	Plant-pathogen interaction (ko04626)	[T]	Signal transduction mechanisms	Protein kinase domain	PTI1-like tyrosine-protein kinase At3g15890 OS=Arabidopsis thaliana OX=3702 GN=At3g15890 PE=2 SV=1	T	Signal transduction mechanisms	PTI1-like tyrosine-protein kinase At3g15890 [Punica granatum]
Nn1g01227	--	--	Cellular Component: integral component of membrane (GO:0016021);;	--	--	--	--	Petal formation-expressed	Probable F-box protein At4g22030 OS=Arabidopsis thaliana OX=3702 GN=At4g22030 PE=4 SV=1	S	Function unknown	PREDICTED: probable F-box protein At4g22030 [Nelumbo nucifera]
Nn5g30130	--	--	Biological Process: regulation of transcription, DNA-templated (GO:0006355);; Biological Process: circadian rhythm (GO:0007623);;	--	--	--	--	--	Protein LNK1 OS=Arabidopsis thaliana OX=3702 GN=LNK1 PE=1 SV=1	S	Function unknown	PREDICTED: protein LNK1-like isoform X1 [Nelumbo nucifera]
Nn1g01869	--	--	Molecular Function: protein kinase activity (GO:0004672);; Molecular Function: ATP binding (GO:0005524);;	--	--	[R]	General function prediction only	Protein kinase domain	Probable plastid-lipid-associated protein 14, chloroplastic OS=Arabidopsis thaliana OX=3702 GN=PAP14 PE=1 SV=1	G	Carbohydrate transport and metabolism	PREDICTED: probable plastid-lipid-associated protein 14, chloroplastic isoform X1 [Nelumbo nucifera]
Nn152s44208	--	--	--	--	--	--	--	--	--	--	--	unnamed protein product [Prunus armeniaca]
Nn8g40466	--	--	Molecular Function: zinc ion binding (GO:0008270);;	K22733|2.1e-133|cit:102612526|K22733 magnesium transporter | (RefSeq) uncharacterized protein LOC102612526	--	[R]	General function prediction only	PPR repeat	Pentatricopeptide repeat-containing protein At4g35130, chloroplastic OS=Arabidopsis thaliana OX=3702 GN=PCMP-H27 PE=3 SV=1	S	Function unknown	PREDICTED: pentatricopeptide repeat-containing protein At4g35130, chloroplastic [Nelumbo nucifera]
Nn435s46667	--	--	--	--	--	--	--	--	--	--	--	Regulator of rDNA transcription protein 15 [Capsicum baccatum]
Nn2g15147	--	--	Cellular Component: mitochondrial matrix (GO:0005759);;	K15414|1.3e-111|nnu:104606280|K15414 complement component 1 Q subcomponent-binding protein, mitochondrial | (RefSeq) mitochondrial acidic protein MAM33	--	--	--	Mitochondrial glycoprotein	--	S	Function unknown	PREDICTED: mitochondrial acidic protein MAM33 [Nelumbo nucifera]
Nelumbo_nucifera_newGene_967	--	--	--	--	--	--	--	--	--	--	--	PREDICTED: uncharacterized protein LOC109115765 [Nelumbo nucifera]
Nn1g07449	--	--	Molecular Function: structural constituent of nuclear pore (GO:0017056);;	K14300|0.0e+00|nnu:104594209|K14300 nuclear pore complex protein Nup133 | (RefSeq) nuclear pore complex protein NUP133	RNA transport (ko03013)	--	--	Nup133 N terminal like	Nuclear pore complex protein NUP133 OS=Arabidopsis thaliana OX=3702 GN=NUP133 PE=1 SV=1	S	Function unknown	PREDICTED: nuclear pore complex protein NUP133 [Nelumbo nucifera]
Nn2g12692	--	--	Cellular Component: plasma membrane (GO:0005886);; Cellular Component: integral component of membrane (GO:0016021);;	--	--	--	--	Domain of unknown function (DUF588)	CASP-like protein 2C1 OS=Vitis vinifera OX=29760 GN=VIT_11s0052g01140 PE=2 SV=1	S	Function unknown	PREDICTED: CASP-like protein 2C1 [Nelumbo nucifera]
Nn195s44824	--	--	--	--	--	--	--	--	--	--	--	Regulator of rDNA transcription protein 15 [Capsicum baccatum]
Nn5g27579	--	--	Molecular Function: phosphoprotein phosphatase activity (GO:0004721);; Cellular Component: nucleus (GO:0005634);;	K17618|1.2e-183|nnu:104589414|K17618 ubiquitin-like domain-containing CTD phosphatase 1 [EC:3.1.3.16] | (RefSeq) ubiquitin-like domain-containing CTD phosphatase	--	[K]	Transcription	NLI interacting factor-like phosphatase	Ubiquitin-like domain-containing CTD phosphatase OS=Arabidopsis thaliana OX=3702 GN=At4g06599 PE=2 SV=1	K	Transcription	PREDICTED: ubiquitin-like domain-containing CTD phosphatase [Nelumbo nucifera]
Nn244s45731	--	--	--	--	--	--	--	--	--	--	--	hypothetical protein LR48_Vigan05g084500 [Vigna angularis]
Nn2g15164	[T]	Signal transduction mechanisms	Molecular Function: protein kinase activity (GO:0004672);; Molecular Function: ATP binding (GO:0005524);;	K13430|2.7e-49|lang:109357403|K13430 serine/threonine-protein kinase PBS1 [EC:2.7.11.1] | (RefSeq) serine/threonine-protein kinase PBS1-like	Plant-pathogen interaction (ko04626)	[T]	Signal transduction mechanisms	Protein kinase domain	Serine/threonine-protein kinase-like protein At3g51990 OS=Arabidopsis thaliana OX=3702 GN=At3g51990 PE=2 SV=1	T	Signal transduction mechanisms	PREDICTED: serine/threonine-protein kinase-like protein At3g51990 [Nelumbo nucifera]
Nn5g29177	--	--	--	--	--	[S]	Function unknown	Oxidoreductase-like protein, N-terminal	--	S	Function unknown	PREDICTED: uncharacterized protein LOC104602013 [Nelumbo nucifera]
Nn6g33884	--	--	--	--	--	--	--	Embryo-specific protein 3, (ATS3)	PLAT domain-containing protein 1 OS=Arabidopsis thaliana OX=3702 GN=PLAT1 PE=1 SV=1	S	Function unknown	PREDICTED: PLAT domain-containing protein 3-like [Nelumbo nucifera]
Nn8g41019	[J]	Translation, ribosomal structure and biogenesis	Biological Process: pseudouridine synthesis (GO:0001522);; Molecular Function: RNA binding (GO:0003723);; Molecular Function: pseudouridine synthase activity (GO:0009982);;	K22538|5.1e-12|mpp:MICPUCDRAFT_59888|K22538 mitochondrial RNA pseudouridine synthase RPUSD4 [EC:5.4.99.-] | (RefSeq) hypothetical protein	--	[A]	RNA processing and modification	RNA pseudouridylate synthase	RNA pseudouridine synthase 3, mitochondrial OS=Arabidopsis thaliana OX=3702 GN=At1g78910 PE=2 SV=1	A	RNA processing and modification	PREDICTED: RNA pseudouridine synthase 3, mitochondrial isoform X1 [Nelumbo nucifera]
Nn2g12834	--	--	Molecular Function: intramolecular lyase activity (GO:0016872);;	K01859|2.4e-223|nnu:104599237|K01859 chalcone isomerase [EC:5.5.1.6] | (RefSeq) chalcone--flavonone isomerase 2-like	Flavonoid biosynthesis (ko00941)	--	--	Chalcone-flavanone isomerase	Chalcone--flavonone isomerase OS=Camellia sinensis OX=4442 GN=CHI PE=2 SV=2	S	Function unknown	PREDICTED: chalcone--flavonone isomerase 2-like [Nelumbo nucifera]
Nn3g16973	--	--	Biological Process: galactose metabolic process (GO:0006012);; Molecular Function: inositol 3-alpha-galactosyltransferase activity (GO:0047216);;	K18819|4.2e-43|nnu:104587235|K18819 inositol 3-alpha-galactosyltransferase [EC:2.4.1.123] | (RefSeq) galactinol synthase 1-like	Galactose metabolism (ko00052)	[G]	Carbohydrate transport and metabolism	--	Galactinol synthase 1 OS=Ajuga reptans OX=38596 GN=GOLS1 PE=1 SV=1	G	Carbohydrate transport and metabolism	PREDICTED: galactinol synthase 1-like isoform X1 [Nelumbo nucifera]
Nn5g30284	[J]	Translation, ribosomal structure and biogenesis	Biological Process: RNA methylation (GO:0001510);; Molecular Function: methyltransferase activity (GO:0008168);; Biological Process: 7-methylguanosine RNA capping (GO:0009452);;	K14292|0.0e+00|nnu:104606219|K14292 trimethylguanosine synthase [EC:2.1.1.-] | (RefSeq) uncharacterized LOC104606219	RNA transport (ko03013)	[R]	General function prediction only	RNA cap guanine-N2 methyltransferase	--	S	Function unknown	PREDICTED: uncharacterized protein LOC104606219 isoform X1 [Nelumbo nucifera]
Nn2g10910	[P]	Inorganic ion transport and metabolism	Molecular Function: potassium ion transmembrane transporter activity (GO:0015079);; Cellular Component: integral component of membrane (GO:0016021);;	K03549|1.7e-179|nnu:104594943|K03549 KUP system potassium uptake protein | (RefSeq) potassium transporter 1	--	--	--	K+ potassium transporter	Potassium transporter 1 OS=Arabidopsis thaliana OX=3702 GN=POT1 PE=1 SV=2	P	Inorganic ion transport and metabolism	PREDICTED: potassium transporter 1 [Nelumbo nucifera]
Nn1g01896	[R]	General function prediction only	Molecular Function: ATP binding (GO:0005524);; Molecular Function: ATPase activity (GO:0016887);;	K06184|0.0e+00|nnu:104600385|K06184 ATP-binding cassette, subfamily F, member 1 | (RefSeq) ABC transporter F family member 4	--	[J]	Translation, ribosomal structure and biogenesis	ABC transporter	ABC transporter F family member 4 OS=Arabidopsis thaliana OX=3702 GN=ABCF4 PE=2 SV=1	J	Translation, ribosomal structure and biogenesis	PREDICTED: ABC transporter F family member 4 [Nelumbo nucifera]
Nn1g06249	--	--	Molecular Function: 1-phosphatidylinositol binding (GO:0005545);; Cellular Component: clathrin-coated vesicle (GO:0030136);; Molecular Function: clathrin binding (GO:0030276);; Biological Process: clathrin coat assembly (GO:0048268);;	K20043|1.4e-72|cann:107878180|K20043 clathrin coat assembly protein AP180 | (RefSeq) clathrin coat assembly protein AP180-like	--	[TU]	Signal transduction mechanisms;; Intracellular trafficking, secretion, and vesicular transport	ANTH domain	Putative clathrin assembly protein At1g03050 OS=Arabidopsis thaliana OX=3702 GN=At1g03050 PE=2 SV=1	--	--	PREDICTED: putative clathrin assembly protein At1g03050 [Nelumbo nucifera]
Nn4g25448	--	--	Molecular Function: GTP binding (GO:0005525);; Cellular Component: cytoplasm (GO:0005737);; Biological Process: intracellular protein transport (GO:0006886);; Biological Process: vesicle-mediated transport (GO:0016192);;	K07937|2.9e-99|cam:101496091|K07937 ADP-ribosylation factor 1/2 | (RefSeq) ADP-ribosylation factor	Endocytosis (ko04144)	[U]	Intracellular trafficking, secretion, and vesicular transport	ADP-ribosylation factor family	ADP-ribosylation factor 2 OS=Oryza sativa subsp. japonica OX=39947 GN=ARF PE=2 SV=2	U	Intracellular trafficking, secretion, and vesicular transport	ADP ribosylation factor [Phaseolus vulgaris]
Nn3g21825	--	--	--	K17469|2.6e-06|nnu:104600085|K17469 sulfate transporter 2, low-affinity | (RefSeq) low affinity sulfate transporter 3-like	--	--	--	--	Sulfate transporter 2.2 OS=Arabidopsis thaliana OX=3702 GN=SULTR2;2 PE=1 SV=3	--	--	--
Nn7g35899	--	--	--	--	--	--	--	--	--	--	--	PREDICTED: uncharacterized protein LOC104597639 [Nelumbo nucifera]
Nn6g34812	--	--	--	K15111|3.0e-30|spen:107015750|K15111 solute carrier family 25 (mitochondrial S-adenosylmethionine transporter), member 26 | (RefSeq) LOW QUALITY PROTEIN: protein MITOFERRINLIKE 1, chloroplastic	--	--	--	Plant organelle RNA recognition domain	Protein WHAT'S THIS FACTOR 1 homolog, chloroplastic OS=Oryza sativa subsp. japonica OX=39947 GN=Os05g0571100 PE=2 SV=1	S	Function unknown	PREDICTED: protein ROOT PRIMORDIUM DEFECTIVE 1 [Nelumbo nucifera]
Nn2g13334	--	--	--	--	--	--	--	--	--	--	--	PREDICTED: putative protein TPRXL [Nelumbo nucifera]
Nn7g38206	--	--	--	--	--	--	--	--	--	--	--	uncharacterized protein LOC111015812 [Momordica charantia]
Nn1g09792	--	--	Molecular Function: metal ion binding (GO:0046872);;	K08852|2.9e-07|mpp:MICPUCDRAFT_15400|K08852 serine/threonine-protein kinase/endoribonuclease IRE1 [EC:2.7.11.1 3.1.26.-] | (RefSeq) hypothetical protein	Protein processing in endoplasmic reticulum (ko04141)	[R]	General function prediction only	Zinc finger C-x8-C-x5-C-x3-H type (and similar)	Zinc finger CCCH domain-containing protein ZFN-like OS=Pisum sativum OX=3888 PE=2 SV=1	S	Function unknown	PREDICTED: zinc finger CCCH domain-containing protein ZFN-like isoform X1 [Nelumbo nucifera]
Nn7g35954	--	--	Cellular Component: integral component of membrane (GO:0016021);;	K00558|1.5e-13|zju:107415089|K00558 DNA (cytosine-5)-methyltransferase 1 [EC:2.1.1.37] | (RefSeq) LOW QUALITY PROTEIN: DNA (cytosine-5)-methyltransferase CMT3-like	Cysteine and methionine metabolism (ko00270)	--	--	--	--	--	--	hypothetical protein BVC80_881g67 [Macleaya cordata]
Nn1g09636	--	--	Molecular Function: zinc ion binding (GO:0008270);; Cellular Component: integral component of membrane (GO:0016021);;	--	--	[A]	RNA processing and modification	Protein of unknown function (DUF3675)	--	A	RNA processing and modification	PREDICTED: uncharacterized protein LOC104605219 [Nelumbo nucifera]
Nn6g34855	--	--	--	--	--	--	--	Hemerythrin HHE cation binding domain	--	S	Function unknown	PREDICTED: uncharacterized protein LOC104588984 isoform X1 [Nelumbo nucifera]
Nn4g23520	--	--	Molecular Function: transferase activity, transferring glycosyl groups (GO:0016757);;	K06617|4.1e-66|vvi:100251818|K06617 raffinose synthase [EC:2.4.1.82] | (RefSeq) galactinol--sucrose galactosyltransferase	Galactose metabolism (ko00052)	--	--	Raffinose synthase or seed imbibition protein Sip1	Probable galactinol--sucrose galactosyltransferase 5 OS=Arabidopsis thaliana OX=3702 GN=RFS5 PE=1 SV=1	S	Function unknown	PREDICTED: galactinol--sucrose galactosyltransferase [Vitis vinifera]
Nn4g25056	[G]	Carbohydrate transport and metabolism	Molecular Function: pectate lyase activity (GO:0030570);; Biological Process: pectin catabolic process (GO:0045490);; Molecular Function: metal ion binding (GO:0046872);;	K01728|3.0e-175|nnu:104594849|K01728 pectate lyase [EC:4.2.2.2] | (RefSeq) putative pectate lyase 2	Pentose and glucuronate interconversions (ko00040)	--	--	Pectate lyase	Probable pectate lyase 16 OS=Arabidopsis thaliana OX=3702 GN=At4g22080 PE=2 SV=1	G	Carbohydrate transport and metabolism	PREDICTED: putative pectate lyase 2 [Nelumbo nucifera]
Nn3g19236	--	--	Molecular Function: DNA binding (GO:0003677);; Cellular Component: nucleus (GO:0005634);; Biological Process: regulation of transcription, DNA-templated (GO:0006355);; Biological Process: auxin-activated signaling pathway (GO:0009734);;	K14486|2.6e-189|nnu:104609299|K14486 auxin response factor | (RefSeq) auxin response factor 7-like	Plant hormone signal transduction (ko04075)	--	--	Auxin response factor	Auxin response factor 19 OS=Arabidopsis thaliana OX=3702 GN=ARF19 PE=1 SV=2	K	Transcription	PREDICTED: auxin response factor 19-like [Nelumbo nucifera]
Nn4g23494	[G]	Carbohydrate transport and metabolism	Biological Process: lipid metabolic process (GO:0006629);; Molecular Function: phosphoric diester hydrolase activity (GO:0008081);;	--	--	--	--	--	PI-PLC X domain-containing protein At5g67130 OS=Arabidopsis thaliana OX=3702 GN=At5g67130 PE=1 SV=1	S	Function unknown	PREDICTED: PI-PLC X domain-containing protein At5g67130 [Nelumbo nucifera]
Nn7g37477	[M]	Cell wall/membrane/envelope biogenesis	Molecular Function: protein kinase activity (GO:0004672);; Molecular Function: ATP binding (GO:0005524);; Cellular Component: integral component of membrane (GO:0016021);;	K13415|1.5e-78|jcu:105636573|K13415 protein brassinosteroid insensitive 1 [EC:2.7.10.1 2.7.11.1] | (RefSeq) protein BRASSINOSTEROID INSENSITIVE 1	Plant hormone signal transduction (ko04075)	--	--	Protein tyrosine and serine/threonine kinase	Probably inactive leucine-rich repeat receptor-like protein kinase At5g48380 OS=Arabidopsis thaliana OX=3702 GN=At5g48380 PE=1 SV=1	T	Signal transduction mechanisms	PREDICTED: probably inactive leucine-rich repeat receptor-like protein kinase At5g48380 [Nelumbo nucifera]
Nn2g10577	--	--	Cellular Component: integral component of membrane (GO:0016021);;	--	--	--	--	--	--	--	--	uncharacterized protein LOC114265720 [Camellia sinensis]
Nn5g30513	--	--	Cellular Component: integral component of membrane (GO:0016021);;	--	--	--	--	Conserved in the green lineage and diatoms 27	Protein CONSERVED IN THE GREEN LINEAGE AND DIATOMS 27, chloroplastic OS=Arabidopsis thaliana OX=3702 GN=CGLD27 PE=2 SV=1	S	Function unknown	PREDICTED: uncharacterized protein LOC104607887 [Nelumbo nucifera]
Nn7g37474	--	--	Cellular Component: integral component of membrane (GO:0016021);;	K01184|1.6e-15|bna:106400152|K01184 polygalacturonase [EC:3.2.1.15] | (RefSeq) polygalacturonase	Pentose and glucuronate interconversions (ko00040)	[R]	General function prediction only	Ankyrin repeats (3 copies)	Ankyrin repeat-containing protein At5g02620 OS=Arabidopsis thaliana OX=3702 GN=At5g02620 PE=1 SV=1	L	Replication, recombination and repair	PREDICTED: ankyrin repeat-containing protein At5g02620-like [Nelumbo nucifera]
Nn1g01120	--	--	Molecular Function: DNA binding (GO:0003677);; Cellular Component: nucleus (GO:0005634);;	K09422|2.1e-88|nnu:104602266|K09422 transcription factor MYB, plant | (RefSeq) protein ODORANT1-like	--	--	--	--	--	--	--	PREDICTED: protein ODORANT1-like [Nelumbo nucifera]
Nn2g15849	[R]	General function prediction only	Molecular Function: O-methyltransferase activity (GO:0008171);; Biological Process: methylation (GO:0032259);;	K00588|5.1e-128|nnu:104611137|K00588 caffeoyl-CoA O-methyltransferase [EC:2.1.1.104] | (RefSeq) flavonoid 3',5'-methyltransferase-like	Phenylpropanoid biosynthesis (ko00940);; Flavonoid biosynthesis (ko00941);; Stilbenoid, diarylheptanoid and gingerol biosynthesis (ko00945)	[Q]	Secondary metabolites biosynthesis, transport and catabolism	O-methyltransferase	Flavonoid 3',5'-methyltransferase OS=Vitis vinifera OX=29760 GN=FAOMT PE=1 SV=1	Q	Secondary metabolites biosynthesis, transport and catabolism	PREDICTED: flavonoid 3',5'-methyltransferase-like [Nelumbo nucifera]
Nelumbo_nucifera_newGene_3033	--	--	--	--	--	--	--	--	--	--	--	PREDICTED: uncharacterized protein LOC104593314 [Nelumbo nucifera]
Nn4g26180	--	--	Biological Process: reproduction (GO:0000003);; Biological Process: response to acid chemical (GO:0001101);; Biological Process: developmental process involved in reproduction (GO:0003006);; Cellular Component: cellular_component (GO:0005575);; Cellular Component: intracellular (GO:0005622);; Cellular Component: cell (GO:0005623);; Cellular Component: nucleus (GO:0005634);; Biological Process: re…	--	--	[O]	Posttranslational modification, protein turnover, chaperones	--	EID1-like F-box protein 3 OS=Arabidopsis thaliana OX=3702 GN=EDL3 PE=2 SV=1	O	Posttranslational modification, protein turnover, chaperones	PREDICTED: EID1-like F-box protein 3 [Nelumbo nucifera]
Nn5g27923	--	--	Cellular Component: integral component of membrane (GO:0016021);;	K20890|7.0e-25|oeu:111370894|K20890 xylan alpha-glucuronosyltransferase [EC:2.4.1.-] | (RefSeq) UDP-glucuronate:xylan alpha-glucuronosyltransferase 1-like	--	[R]	General function prediction only	Domain of unknown function	--	G	Carbohydrate transport and metabolism	PREDICTED: uncharacterized protein LOC104596680 isoform X2 [Nelumbo nucifera]
Nn6g32260	--	--	Molecular Function: nucleic acid binding (GO:0003676);; Molecular Function: zinc ion binding (GO:0008270);;	K13449|1.2e-15|cpep:111785251|K13449 pathogenesis-related protein 1 | (RefSeq) basic form of pathogenesis-related protein 1-like	MAPK signaling pathway - plant (ko04016);; Plant hormone signal transduction (ko04075);; Plant-pathogen interaction (ko04626)	[R]	General function prediction only	gag-polypeptide of LTR copia-type	--	L	Replication, recombination and repair	PREDICTED: uncharacterized protein LOC104605001 [Nelumbo nucifera]
Nn8g38582	--	--	Biological Process: reproduction (GO:0000003);; Biological Process: response to acid chemical (GO:0001101);; Biological Process: developmental process involved in reproduction (GO:0003006);; Molecular Function: molecular_function (GO:0003674);; Molecular Function: transcription cofactor activity (GO:0003712);; Molecular Function: transcription corepressor activity (GO:0003714);; Cellular Componen…	K13464|5.1e-154|nnu:104600505|K13464 jasmonate ZIM domain-containing protein | (RefSeq) protein TIFY 10B	Plant hormone signal transduction (ko04075)	--	--	tify domain	Protein TIFY 10B OS=Arabidopsis thaliana OX=3702 GN=TIFY10B PE=1 SV=1	S	Function unknown	PREDICTED: protein TIFY 10B [Nelumbo nucifera]
Nn5g30356	--	--	--	--	--	--	--	Filament-like plant protein, long coiled-coil	Filament-like plant protein 7 OS=Arabidopsis thaliana OX=3702 GN=FPP7 PE=3 SV=2	S	Function unknown	PREDICTED: filament-like plant protein 7 isoform X1 [Nelumbo nucifera]
Nn8g40482	[I]	Lipid transport and metabolism	Molecular Function: hydrolase activity (GO:0016787);;	K14493|2.3e-65|atr:18446855|K14493 gibberellin receptor GID1 [EC:3.-.-.-] | (RefSeq) gibberellin receptor GID1C	Plant hormone signal transduction (ko04075)	[V]	Defense mechanisms	alpha/beta hydrolase fold	Probable carboxylesterase 18 OS=Arabidopsis thaliana OX=3702 GN=CXE18 PE=1 SV=1	V	Defense mechanisms	PREDICTED: probable carboxylesterase 18 [Nelumbo nucifera]
Nn1g07711	--	--	Biological Process: protein glycosylation (GO:0006486);; Molecular Function: transferase activity, transferring glycosyl groups (GO:0016757);;	K18789|9.0e-59|psom:113357475|K18789 xylogalacturonan beta-1,3-xylosyltransferase [EC:2.4.2.41] | (RefSeq) probable glycosyltransferase At5g20260	--	[GMW]	Carbohydrate transport and metabolism;; Cell wall/membrane/envelope biogenesis;; Extracellular structures	Exostosin family	Probable glycosyltransferase At3g07620 OS=Arabidopsis thaliana OX=3702 GN=At3g07620 PE=3 SV=1	--	--	PREDICTED: LOW QUALITY PROTEIN: probable glycosyltransferase At3g07620 [Nelumbo nucifera]
Nn1g04512	--	--	Molecular Function: transferase activity, transferring acyl groups other than amino-acyl groups (GO:0016747);;	K19747|3.3e-67|dct:110092161|K19747 BAHD acyltransferase [EC:2.3.1.-] | (RefSeq) BAHD acyltransferase DCR-like	--	--	--	Transferase family	Uncharacterized acetyltransferase At3g50280 OS=Arabidopsis thaliana OX=3702 GN=At3g50280 PE=3 SV=1	S	Function unknown	PREDICTED: uncharacterized acetyltransferase At3g50280-like [Nelumbo nucifera]
Nn1g00852	[D]	Cell cycle control, cell division, chromosome partitioning	Molecular Function: ATP binding (GO:0005524);;	--	--	--	--	--	Protein SEEDLING PLASTID DEVELOPMENT 1 OS=Arabidopsis thaliana OX=3702 GN=SPD1 PE=2 SV=1	--	--	PREDICTED: uncharacterized protein ycf45 isoform X2 [Nelumbo nucifera]
Nn1g09382	[T]	Signal transduction mechanisms	Molecular Function: molecular_function (GO:0003674);; Molecular Function: binding (GO:0005488);; Cellular Component: cellular_component (GO:0005575);; Cellular Component: intracellular (GO:0005622);; Cellular Component: cell (GO:0005623);; Cellular Component: cytoplasm (GO:0005737);; Cellular Component: mitochondrion (GO:0005739);; Biological Process: response to stress (GO:0006950);; Biological …	--	--	--	--	CBS domain	CBS domain-containing protein CBSX3, mitochondrial OS=Arabidopsis thaliana OX=3702 GN=CBSX3 PE=1 SV=1	S	Function unknown	PREDICTED: CBS domain-containing protein CBSX3, mitochondrial-like [Nelumbo nucifera]
Nn5g28787	--	--	Biological Process: protein deneddylation (GO:0000338);; Cellular Component: COP9 signalosome (GO:0008180);; Biological Process: COP9 signalosome assembly (GO:0010387);;	K12181|5.2e-12|nnu:104599934|K12181 COP9 signalosome complex subunit 8 | (RefSeq) COP9 signalosome complex subunit 8	--	[OT]	Posttranslational modification, protein turnover, chaperones;; Signal transduction mechanisms	--	COP9 signalosome complex subunit 8 OS=Arabidopsis thaliana OX=3702 GN=CSN8 PE=1 SV=1	--	--	PREDICTED: COP9 signalosome complex subunit 8 [Nelumbo nucifera]
Nn5g31329	--	--	--	--	--	--	--	--	--	--	--	hypothetical protein CQW23_34295 [Capsicum baccatum]
Nn1g02752	[M]	Cell wall/membrane/envelope biogenesis	Molecular Function: protein serine/threonine kinase activity (GO:0004674);; Molecular Function: ATP binding (GO:0005524);;	K08794|2.7e-134|nnu:104600864|K08794 calcium/calmodulin-dependent protein kinase I [EC:2.7.11.17] | (RefSeq) phosphoenolpyruvate carboxylase kinase 1-like	--	[T]	Signal transduction mechanisms	Protein kinase domain	Phosphoenolpyruvate carboxylase kinase 1 OS=Arabidopsis thaliana OX=3702 GN=PPCK1 PE=1 SV=1	T	Signal transduction mechanisms	PREDICTED: phosphoenolpyruvate carboxylase kinase 1-like isoform X2 [Nelumbo nucifera]
Nn6g31501	[R]	General function prediction only	Molecular Function: ARF guanyl-nucleotide exchange factor activity (GO:0005086);; Biological Process: regulation of ARF protein signal transduction (GO:0032012);;	K13462|0.0e+00|nnu:104589434|K13462 guanine nucleotide-exchange factor | (RefSeq) brefeldin A-inhibited guanine nucleotide-exchange protein 5	--	[U]	Intracellular trafficking, secretion, and vesicular transport	Sec7 domain	Brefeldin A-inhibited guanine nucleotide-exchange protein 5 OS=Arabidopsis thaliana OX=3702 GN=BIG5 PE=1 SV=2	L	Replication, recombination and repair	PREDICTED: brefeldin A-inhibited guanine nucleotide-exchange protein 5 isoform X2 [Nelumbo nucifera]
Nn1g09874	--	--	Cellular Component: Golgi membrane (GO:0000139);; Molecular Function: pyrimidine nucleotide-sugar transmembrane transporter activity (GO:0015165);; Cellular Component: integral component of membrane (GO:0016021);;	K15272|4.4e-30|qsu:111997732|K15272 solute carrier family 35 (UDP-sugar transporter), member A1/2/3 | (RefSeq) CMP-sialic acid transporter 2-like	--	[G]	Carbohydrate transport and metabolism	Nucleotide-sugar transporter	CMP-sialic acid transporter 3 OS=Arabidopsis thaliana OX=3702 GN=UTR6 PE=2 SV=1	G	Carbohydrate transport and metabolism	PREDICTED: CMP-sialic acid transporter 2-like [Nelumbo nucifera]
Nn2g13135	--	--	Cellular Component: integral component of membrane (GO:0016021);; Molecular Function: phosphatase activity (GO:0016791);;	K15731|3.1e-159|nnu:104602596|K15731 carboxy-terminal domain RNA polymerase II polypeptide A small phosphatase [EC:3.1.3.16] | (RefSeq) CTD nuclear envelope phosphatase 1 homolog	--	[K]	Transcription	NLI interacting factor-like phosphatase	Mitochondrial import inner membrane translocase subunit TIM50 OS=Phytophthora infestans OX=4787 GN=TIM50 PE=2 SV=1	K	Transcription	PREDICTED: CTD nuclear envelope phosphatase 1 homolog [Nelumbo nucifera]
Nn2g12914	--	--	Cellular Component: nucleosome (GO:0000786);; Molecular Function: DNA binding (GO:0003677);; Cellular Component: nucleus (GO:0005634);; Molecular Function: protein heterodimerization activity (GO:0046982);;	K11251|4.9e-76|nnu:104599302|K11251 histone H2A | (RefSeq) histone H2A-like	--	[B]	Chromatin structure and dynamics	C-terminus of histone H2A	Histone H2A OS=Euphorbia esula OX=3993 PE=2 SV=1	B	Chromatin structure and dynamics	PREDICTED: histone H2A-like [Nelumbo nucifera]
Nn2g14614	--	--	Cellular Component: nuclear chromosome (GO:0000228);; Cellular Component: condensed chromosome (GO:0000793);; Cellular Component: condensed nuclear chromosome (GO:0000794);; Biological Process: in utero embryonic development (GO:0001701);; Biological Process: somitogenesis (GO:0001756);; Biological Process: regulation of protein phosphorylation (GO:0001932);; Molecular Function: protease binding …	--	--	--	--	--	--	O	Posttranslational modification, protein turnover, chaperones	hypothetical protein EZV62_002804 [Acer yangbiense]
Nn3g18070	--	--	--	--	--	--	--	DUF761-associated sequence motif	--	--	--	PREDICTED: uncharacterized protein LOC104592177 [Nelumbo nucifera]
Nn1g09345	--	--	Molecular Function: protein binding (GO:0005515);; Biological Process: cellular protein modification process (GO:0006464);; Biological Process: proteolysis (GO:0006508);; Biological Process: ubiquitin-dependent protein catabolic process (GO:0006511);; Biological Process: nitrogen compound metabolic process (GO:0006807);; Biological Process: biological_process (GO:0008150);; Biological Process: me…	--	--	--	--	F-box-like	F-box protein SKIP31 OS=Arabidopsis thaliana OX=3702 GN=SKIP31 PE=1 SV=1	S	Function unknown	PREDICTED: F-box protein SKIP31-like isoform X1 [Nelumbo nucifera]
Nn2g11637	--	--	Molecular Function: endoribonuclease activity, producing 5'-phosphomonoesters (GO:0016891);; Biological Process: tRNA 3'-trailer cleavage (GO:0042779);;	K00784|3.9e-11|nnu:104612364|K00784 ribonuclease Z [EC:3.1.26.11] | (RefSeq) zinc phosphodiesterase ELAC protein 2-like	RNA transport (ko03013)	--	--	--	--	U	Intracellular trafficking, secretion, and vesicular transport	PREDICTED: zinc phosphodiesterase ELAC protein 2-like isoform X1 [Nelumbo nucifera]
Nn3g16565	--	--	Biological Process: spindle assembly (GO:0051225);; Cellular Component: HAUS complex (GO:0070652);;	K07953|8.2e-25|vvi:100266574|K07953 GTP-binding protein SAR1 [EC:3.6.5.-] | (RefSeq) GTP-binding protein SAR1B-like	Protein processing in endoplasmic reticulum (ko04141)	--	--	--	AUGMIN subunit 6 OS=Arabidopsis thaliana OX=3702 GN=AUG6 PE=1 SV=1	S	Function unknown	PREDICTED: AUGMIN subunit 6-like [Nelumbo nucifera]
Nn3g20332	[P]	Inorganic ion transport and metabolism	Molecular Function: hydrolase activity (GO:0016787);;	--	--	--	--	Beta-lactamase superfamily domain	--	S	Function unknown	PREDICTED: putative hydrolase C777.06c [Nelumbo nucifera]
Nn3g19536	--	--	--	K14318|5.2e-15|aof:109831087|K14318 nuclear pore complex protein Nup88 | (RefSeq) LOW QUALITY PROTEIN: nuclear pore complex protein NUP88	RNA transport (ko03013)	[L]	Replication, recombination and repair	DDE superfamily endonuclease	--	B	Chromatin structure and dynamics	PREDICTED: uncharacterized protein LOC104613038 [Nelumbo nucifera]
Nn3g19336	--	--	--	--	--	--	--	--	--	--	--	hypothetical protein E1A91_A01G033000v1 [Gossypium mustelinum]
Nn7g36553	[M]	Cell wall/membrane/envelope biogenesis	Molecular Function: protein serine/threonine kinase activity (GO:0004674);; Molecular Function: calcium ion binding (GO:0005509);; Molecular Function: ATP binding (GO:0005524);; Cellular Component: integral component of membrane (GO:0016021);; Molecular Function: polysaccharide binding (GO:0030247);;	K23544|2.4e-123|brp:103842861|K23544 serine incorporator 1/3 | (RefSeq) serine incorporator 3	--	--	--	Protein kinase domain	Wall-associated receptor kinase 2 OS=Arabidopsis thaliana OX=3702 GN=WAK2 PE=1 SV=1	T	Signal transduction mechanisms	PREDICTED: putative wall-associated receptor kinase-like 16 [Nelumbo nucifera]
Nn1g03534	--	--	--	--	--	--	--	Protein of unknown function (DUF1442)	--	--	--	PREDICTED: uncharacterized protein LOC104596244 [Nelumbo nucifera]
Nn1g01409	--	--	Molecular Function: nucleic acid binding (GO:0003676);; Molecular Function: RNA-DNA hybrid ribonuclease activity (GO:0004523);;	--	--	--	--	--	--	S	Function unknown	PREDICTED: uncharacterized protein LOC104592081 isoform X1 [Nelumbo nucifera]
Nn4g22366	--	--	Molecular Function: protein kinase activity (GO:0004672);; Molecular Function: ATP binding (GO:0005524);; Cellular Component: integral component of membrane (GO:0016021);;	--	--	--	--	--	--	T	Signal transduction mechanisms	PREDICTED: LOW QUALITY PROTEIN: protein LYK2-like [Nelumbo nucifera]
Nn6g31621	--	--	--	K20308|0.0e+00|nnu:104606860|K20308 trafficking protein particle complex subunit 11 | (RefSeq) trafficking protein particle complex subunit 11	--	[S]	Function unknown	Foie gras liver health family 1	--	--	--	PREDICTED: trafficking protein particle complex subunit 11 isoform X1 [Nelumbo nucifera]
Nn3g21123	--	--	Molecular Function: zinc ion binding (GO:0008270);;	K22262|2.1e-166|qsu:112034235|K22262 WD repeat and FYVE domain-containing protein 3 | (RefSeq) protein SPIRRIG	--	[R]	General function prediction only	PPR repeat family	Pentatricopeptide repeat-containing protein DOT4, chloroplastic OS=Arabidopsis thaliana OX=3702 GN=DOT4 PE=2 SV=1	J	Translation, ribosomal structure and biogenesis	PREDICTED: pentatricopeptide repeat-containing protein DOT4, chloroplastic [Nelumbo nucifera]
Nn1g02497	--	--	Molecular Function: DNA binding (GO:0003677);; Molecular Function: protein dimerization activity (GO:0046983);;	--	--	[L]	Replication, recombination and repair	Domain of unknown function (DUF4413)	Zinc finger BED domain-containing protein RICESLEEPER 1 OS=Oryza sativa subsp. japonica OX=39947 GN=Os05g0239150 PE=3 SV=1	L	Replication, recombination and repair	PREDICTED: zinc finger BED domain-containing protein RICESLEEPER 3-like [Nelumbo nucifera]
Nn2g12303	[M]	Cell wall/membrane/envelope biogenesis	--	K03098|2.9e-107|nnu:104603340|K03098 apolipoprotein D and lipocalin family protein | (RefSeq) temperature-induced lipocalin-1-like	--	[M]	Cell wall/membrane/envelope biogenesis	Lipocalin-like domain	Temperature-induced lipocalin-1 OS=Arabidopsis thaliana OX=3702 GN=TIL PE=1 SV=1	M	Cell wall/membrane/envelope biogenesis	PREDICTED: temperature-induced lipocalin-1-like [Nelumbo nucifera]
Nn6g32858	--	--	--	--	--	--	--	--	--	--	--	rRNA intron-encoded homing endonuclease [Gossypium australe]
Nn4g22330	--	--	Molecular Function: phosphatase activity (GO:0016791);;	K17616|1.7e-129|nnu:104591716|K17616 CTD small phosphatase-like protein 2 [EC:3.1.3.-] | (RefSeq) CTD small phosphatase-like protein 2	--	[K]	Transcription	NLI interacting factor-like phosphatase	--	K	Transcription	PREDICTED: CTD small phosphatase-like protein 2 [Nelumbo nucifera]
Nn4g24593	[T]	Signal transduction mechanisms	Molecular Function: solute:proton antiporter activity (GO:0015299);; Cellular Component: integral component of membrane (GO:0016021);;	K14726|2.2e-35|cme:CYME_CMS152C|K14726 solute carrier family 9 (sodium/hydrogen exchanger), member 10/11 | (RefSeq) probable sodium/hydrogen antiporter	--	[P]	Inorganic ion transport and metabolism	Sodium/hydrogen exchanger family	Sodium/hydrogen exchanger 7 OS=Arabidopsis thaliana OX=3702 GN=NHX7 PE=1 SV=1	P	Inorganic ion transport and metabolism	PREDICTED: sodium/hydrogen exchanger 8 [Nelumbo nucifera]
Nn5g29760	[O]	Posttranslational modification, protein turnover, chaperones	Molecular Function: ATP binding (GO:0005524);;	K03695|6.1e-153|nnu:104611040|K03695 ATP-dependent Clp protease ATP-binding subunit ClpB | (RefSeq) chaperone protein ClpB1	--	[O]	Posttranslational modification, protein turnover, chaperones	AAA lid domain	Chaperone protein ClpB1 OS=Arabidopsis thaliana OX=3702 GN=CLPB1 PE=1 SV=2	O	Posttranslational modification, protein turnover, chaperones	PREDICTED: chaperone protein ClpB1 [Nelumbo nucifera]
Nn6g33734	--	--	Cellular Component: protein kinase CK2 complex (GO:0005956);; Molecular Function: kinase activity (GO:0016301);; Molecular Function: protein kinase regulator activity (GO:0019887);;	K03115|1.1e-164|nnu:104606389|K03115 casein kinase II subunit beta | (RefSeq) casein kinase II subunit beta-1-like	Ribosome biogenesis in eukaryotes (ko03008);; Circadian rhythm - plant (ko04712)	[TDK]	Signal transduction mechanisms;; Cell cycle control, cell division, chromosome partitioning;; Transcription	Casein kinase II regulatory subunit	Casein kinase II subunit beta-1 OS=Arabidopsis thaliana OX=3702 GN=CKB1 PE=1 SV=1	--	--	PREDICTED: putative casein kinase II subunit beta-4 isoform X2 [Nelumbo nucifera]
Nn2g14844	[G]	Carbohydrate transport and metabolism	Molecular Function: phosphoglycerate kinase activity (GO:0004618);; Biological Process: glycolytic process (GO:0006096);;	K00927|1.4e-65|nnu:104606042|K00927 phosphoglycerate kinase [EC:2.7.2.3] | (RefSeq) phosphoglycerate kinase, chloroplastic-like	Glycolysis / Gluconeogenesis (ko00010);; Carbon fixation in photosynthetic organisms (ko00710);; Carbon metabolism (ko01200);; Biosynthesis of amino acids (ko01230)	[G]	Carbohydrate transport and metabolism	Phosphoglycerate kinase	Phosphoglycerate kinase 2, chloroplastic OS=Arabidopsis thaliana OX=3702 GN=At1g56190 PE=1 SV=3	G	Carbohydrate transport and metabolism	PREDICTED: phosphoglycerate kinase, chloroplastic-like [Nelumbo nucifera]
Nn8g40506	[S]	Function unknown	Cellular Component: extracellular region (GO:0005576);;	K13449|3.3e-45|egu:105031941|K13449 pathogenesis-related protein 1 | (RefSeq) pathogenesis-related protein PRB1-3-like	MAPK signaling pathway - plant (ko04016);; Plant hormone signal transduction (ko04075);; Plant-pathogen interaction (ko04626)	[S]	Function unknown	Cysteine-rich secretory protein family	Pathogenesis-related protein PR-1 OS=Medicago truncatula OX=3880 GN=PR-1 PE=2 SV=1	S	Function unknown	PREDICTED: pathogenesis-related protein PR-1 [Nelumbo nucifera]
Nn6g34263	--	--	Cellular Component: integral component of membrane (GO:0016021);;	K19039|7.8e-09|csat:104737016|K19039 E3 ubiquitin-protein ligase ATL7/58/59 [EC:2.3.2.27] | (RefSeq) RING-H2 finger protein ATL7-like	--	[O]	Posttranslational modification, protein turnover, chaperones	RING-H2 zinc finger domain	RING-H2 finger protein ATL63 OS=Arabidopsis thaliana OX=3702 GN=ATL63 PE=2 SV=1	O	Posttranslational modification, protein turnover, chaperones	PREDICTED: RING-H2 finger protein ATL80-like [Nelumbo nucifera]
Nn136s43837	--	--	--	--	--	--	--	--	--	--	--	hypothetical protein CSA_004614 [Cucumis sativus]
Nn4g22391	[E]	Amino acid transport and metabolism	Molecular Function: urease activity (GO:0009039);; Molecular Function: nickel cation binding (GO:0016151);; Biological Process: urea catabolic process (GO:0043419);;	K01427|0.0e+00|nnu:104591664|K01427 urease [EC:3.5.1.5] | (RefSeq) urease	Arginine biosynthesis (ko00220);; Purine metabolism (ko00230)	--	--	Amidohydrolase family	Urease OS=Oryza sativa subsp. indica OX=39946 PE=1 SV=1	F	Nucleotide transport and metabolism	PREDICTED: urease isoform X1 [Nelumbo nucifera]
Nn4g26212	--	--	Cellular Component: nucleus (GO:0005634);; Molecular Function: protein heterodimerization activity (GO:0046982);;	K08066|3.9e-148|nnu:104612503|K08066 nuclear transcription factor Y, gamma | (RefSeq) nuclear transcription factor Y subunit C-9	--	[K]	Transcription	Histone-like transcription factor (CBF/NF-Y) and archaeal histone	Nuclear transcription factor Y subunit C-3 OS=Arabidopsis thaliana OX=3702 GN=NFYC3 PE=1 SV=1	K	Transcription	PREDICTED: nuclear transcription factor Y subunit C-9 [Nelumbo nucifera]
Nn1g04723	--	--	Cellular Component: integral component of membrane (GO:0016021);; Biological Process: vesicle-mediated transport (GO:0016192);;	K08486|2.3e-34|nnu:104608306|K08486 syntaxin 1B/2/3 | (RefSeq) syntaxin-related protein KNOLLE	SNARE interactions in vesicular transport (ko04130)	[U]	Intracellular trafficking, secretion, and vesicular transport	Syntaxin	Syntaxin-112 OS=Arabidopsis thaliana OX=3702 GN=SYP112 PE=2 SV=2	U	Intracellular trafficking, secretion, and vesicular transport	PREDICTED: syntaxin-related protein KNOLLE [Nelumbo nucifera]
Nn1g07171	--	--	Molecular Function: hydrolase activity, acting on ester bonds (GO:0016788);;	--	--	--	--	GDSL-like Lipase/Acylhydrolase	GDSL esterase/lipase At5g55050 OS=Arabidopsis thaliana OX=3702 GN=At5g55050 PE=2 SV=1	L	Replication, recombination and repair	PREDICTED: GDSL esterase/lipase At5g55050-like [Nelumbo nucifera]
Nn1g00786	--	--	Cellular Component: integral component of membrane (GO:0016021);;	K20359|1.1e-46|qsu:112029759|K20359 PRA1 family protein 1 | (RefSeq) PRA1 family protein F3-like	--	[U]	Intracellular trafficking, secretion, and vesicular transport	PRA1 family protein	PRA1 family protein F4 OS=Arabidopsis thaliana OX=3702 GN=PRA1F4 PE=2 SV=1	U	Intracellular trafficking, secretion, and vesicular transport	PREDICTED: PRA1 family protein F3-like [Nelumbo nucifera]
Nn4g25982	--	--	Molecular Function: zinc ion binding (GO:0008270);;	K10144|6.6e-148|nnu:104586097|K10144 RING finger and CHY zinc finger domain-containing protein 1 [EC:2.3.2.27] | (RefSeq) E3 ubiquitin-protein ligase MIEL1	Ubiquitin mediated proteolysis (ko04120)	[R]	General function prediction only	Zinc-ribbon	E3 ubiquitin-protein ligase MIEL1 OS=Arabidopsis thaliana OX=3702 GN=MIEL1 PE=1 SV=1	O	Posttranslational modification, protein turnover, chaperones	PREDICTED: E3 ubiquitin-protein ligase MIEL1 [Nelumbo nucifera]
Nn7g36646	[J]	Translation, ribosomal structure and biogenesis	Molecular Function: structural constituent of ribosome (GO:0003735);; Cellular Component: ribosome (GO:0005840);; Biological Process: translation (GO:0006412);; Molecular Function: rRNA binding (GO:0019843);;	K02887|1.8e-54|nnu:104611296|K02887 large subunit ribosomal protein L20 | (RefSeq) 50S ribosomal protein L20-like	Ribosome (ko03010)	[J]	Translation, ribosomal structure and biogenesis	Ribosomal protein L20	50S ribosomal protein L20, organellar chromatophore OS=Paulinella chromatophora OX=39717 GN=rpl20 PE=3 SV=1	J	Translation, ribosomal structure and biogenesis	PREDICTED: uncharacterized protein LOC104611296 [Nelumbo nucifera]
Nn1g02336	--	--	Molecular Function: nucleic acid binding (GO:0003676);; Molecular Function: RNA-DNA hybrid ribonuclease activity (GO:0004523);;	K13415|9.0e-06|obr:102715163|K13415 protein brassinosteroid insensitive 1 [EC:2.7.10.1 2.7.11.1] | (RefSeq) protein BRASSINOSTEROID INSENSITIVE 1-like	Plant hormone signal transduction (ko04075)	--	--	--	--	S	Function unknown	PREDICTED: uncharacterized protein LOC109159424 [Ipomoea nil]
Nn1g07503	--	--	--	K17046|1.1e-12|tcc:18593293|K17046 protein DEK | (RefSeq) DNA ligase 1	--	--	--	--	--	--	--	PREDICTED: uncharacterized protein LOC104594246 [Nelumbo nucifera]
Nn1g09245	--	--	--	K20286|3.8e-66|nnu:104592155|K20286 TATA element modulatory factor | (RefSeq) golgin candidate 5-like	--	--	--	--	--	K	Transcription	PREDICTED: golgin candidate 5-like isoform X1 [Nelumbo nucifera]
Nn394s46554	--	--	--	--	--	--	--	--	--	--	--	pentatricopeptide repeat-containing protein At3g50420-like [Populus trichocarpa]
Nelumbo_nucifera_newGene_591	--	--	Molecular Function: nucleic acid binding (GO:0003676);;	--	--	[R]	General function prediction only	--	--	E	Amino acid transport and metabolism	PREDICTED: uncharacterized protein LOC104612286 [Nelumbo nucifera]
Nn1g10066	--	--	Molecular Function: ATP binding (GO:0005524);; Cellular Component: chloroplast stroma (GO:0009570);;	K09286|2.1e-06|ghi:107919633|K09286 EREBP-like factor | (RefSeq) ethylene-responsive transcription factor 13-like	--	--	--	Plant protein of unknown function (DUF825)	Protein Ycf2 OS=Chloranthus spicatus OX=13006 GN=ycf2-A PE=3 SV=1	C	Energy production and conversion	Ycf2 [Amphilophium nunezii]
Nn4g24387	--	--	Biological Process: karyogamy (GO:0000741);; Cellular Component: cellular_component (GO:0005575);; Cellular Component: intracellular (GO:0005622);; Cellular Component: cell (GO:0005623);; Cellular Component: nucleus (GO:0005634);; Biological Process: organelle organization (GO:0006996);; Biological Process: nucleus organization (GO:0006997);; Biological Process: multicellular organism development…	K13148|6.9e-150|nnu:109115425|K13148 integrator complex subunit 11 [EC:3.1.27.-] | (RefSeq) cleavage and polyadenylation specificity factor subunit 3-II-like	--	[A]	RNA processing and modification	Zn-dependent metallo-hydrolase RNA specificity domain	Cleavage and polyadenylation specificity factor subunit 3-II OS=Arabidopsis thaliana OX=3702 GN=CPSF73-II PE=1 SV=2	A	RNA processing and modification	PREDICTED: cleavage and polyadenylation specificity factor subunit 3-II-like [Nelumbo nucifera]
Nn6g33034	--	--	--	--	--	--	--	--	--	--	--	rRNA intron-encoded homing endonuclease [Gossypium australe]
Nn1g08548	--	--	Molecular Function: transcription factor activity, sequence-specific DNA binding (GO:0003700);; Cellular Component: nucleus (GO:0005634);; Molecular Function: sequence-specific DNA binding (GO:0043565);;	K13424|1.1e-21|ccaj:109816325|K13424 WRKY transcription factor 33 | (RefSeq) probable WRKY transcription factor 33	MAPK signaling pathway - plant (ko04016);; Plant-pathogen interaction (ko04626)	--	--	WRKY DNA -binding domain	Probable WRKY transcription factor 9 OS=Arabidopsis thaliana OX=3702 GN=WRKY9 PE=2 SV=1	K	Transcription	PREDICTED: probable WRKY transcription factor 9 [Nelumbo nucifera]
Nn3g20567	--	--	--	--	--	--	--	--	--	--	--	uncharacterized protein LOC118033973 [Populus alba]
Nn3g16799	--		Molecular Function: protein kinase activity (GO:0004672);; Molecular Function: ATP binding (GO:0005524);; Cellular Component: integral component of membrane (GO:0016021);;	K24104|1.8e-47|thj:104799061|K24104 GPN-loop GTPase | (RefSeq) LOW QUALITY PROTEIN: uncharacterized protein LOC104799061	--	--	--	Protein kinase domain	Putative cysteine-rich receptor-like protein kinase 43 OS=Arabidopsis thaliana OX=3702 GN=CRK43 PE=3 SV=1	T	Signal transduction mechanisms	PREDICTED: putative cysteine-rich receptor-like protein kinase 43 [Nelumbo nucifera]
Nn6g32092	--	--	Molecular Function: translation initiation factor activity (GO:0003743);;	K03113|1.1e-34|nnu:104585667|K03113 translation initiation factor 1 | (RefSeq) protein translation factor SUI1 homolog	RNA transport (ko03013)	[J]	Translation, ribosomal structure and biogenesis	Translation initiation factor SUI1	Protein translation factor SUI1 homolog OS=Zea mays OX=4577 GN=TIF PE=3 SV=1	J	Translation, ribosomal structure and biogenesis	protein translation factor SUI1 homolog [Nymphaea colorata]
Nn1g05285	[G]	Carbohydrate transport and metabolism	Molecular Function: hydrolase activity, hydrolyzing O-glycosyl compounds (GO:0004553);; Biological Process: carbohydrate metabolic process (GO:0005975);; Biological Process: actin filament organization (GO:0007015);; Molecular Function: actin filament binding (GO:0051015);;	K01210|2.6e-31|qsu:112019139|K01210 glucan 1,3-beta-glucosidase [EC:3.2.1.58] | (RefSeq) glucan 1,3-beta-glucosidase-like	Starch and sucrose metabolism (ko00500)	--	--	Cellulase (glycosyl hydrolase family 5)	--	G	Carbohydrate transport and metabolism	PREDICTED: glucan 1,3-beta-glucosidase A-like [Nelumbo nucifera]
Nn221s45341	--	--	--	--	--	--	--	--	--	--	--	predicted protein [Micromonas pusilla CCMP1545]
Nn087s42766	--	--	--	--	--	--	--	--	--	--	--	hypothetical protein GLYMA_13G011700 [Glycine max]
Nn4g22346	--	--	Molecular Function: molecular_function (GO:0003674);; Molecular Function: binding (GO:0005488);; Molecular Function: protein binding (GO:0005515);; Cellular Component: cellular_component (GO:0005575);; Cellular Component: intracellular (GO:0005622);; Cellular Component: cell (GO:0005623);; Cellular Component: cytoplasm (GO:0005737);; Biological Process: movement of cell or subcellular component (…	K23538|4.4e-113|nnu:104591705|K23538 ELMO domain-containing protein | (RefSeq) ELMO domain-containing protein A-like	--	[S]	Function unknown	ELMO/CED-12 family	--	S	Function unknown	PREDICTED: ELMO domain-containing protein A-like isoform X1 [Nelumbo nucifera]
Nn1g06287	--	--	Molecular Function: oxidoreductase activity, acting on the aldehyde or oxo group of donors, disulfide as acceptor (GO:0016624);;	K00166|3.5e-60|nnu:104599555|K00166 2-oxoisovalerate dehydrogenase E1 component alpha subunit [EC:1.2.4.4] | (RefSeq) 2-oxoisovalerate dehydrogenase subunit alpha 2, mitochondrial-like	Valine, leucine and isoleucine degradation (ko00280);; Propanoate metabolism (ko00640)	[C]	Energy production and conversion	--	2-oxoisovalerate dehydrogenase subunit alpha 1, mitochondrial OS=Arabidopsis thaliana OX=3702 GN=At1g21400 PE=2 SV=1	C	Energy production and conversion	PREDICTED: 2-oxoisovalerate dehydrogenase subunit alpha 1, mitochondrial-like isoform X1 [Nelumbo nucifera]
Nn2g12830	[P]	Inorganic ion transport and metabolism	Molecular Function: cation transmembrane transporter activity (GO:0008324);; Cellular Component: integral component of membrane (GO:0016021);;	K14689|1.3e-231|nnu:104599232|K14689 solute carrier family 30 (zinc transporter), member 2 | (RefSeq) metal tolerance protein A1-like	--	[P]	Inorganic ion transport and metabolism	Cation efflux family	Metal tolerance protein 1 OS=Arabidopsis thaliana OX=3702 GN=MTP1 PE=1 SV=2	P	Inorganic ion transport and metabolism	PREDICTED: metal tolerance protein A1-like [Nelumbo nucifera]
Nn1g04148	--	--	Molecular Function: ATP transmembrane transporter activity (GO:0005347);; Cellular Component: mitochondrial inner membrane (GO:0005743);; Cellular Component: integral component of membrane (GO:0016021);;	K05863|2.7e-161|nnu:104608195|K05863 solute carrier family 25 (mitochondrial adenine nucleotide translocator), member 4/5/6/31 | (RefSeq) ADP,ATP carrier protein 3, mitochondrial-like	--	[C]	Energy production and conversion	Mitochondrial carrier protein	ADP,ATP carrier protein 3, mitochondrial OS=Arabidopsis thaliana OX=3702 GN=AAC3 PE=1 SV=1	C	Energy production and conversion	PREDICTED: ADP,ATP carrier protein 3, mitochondrial-like isoform X2 [Nelumbo nucifera]
Nn5g27630	--	--	Molecular Function: SNAP receptor activity (GO:0005484);; Biological Process: intracellular protein transport (GO:0006886);; Cellular Component: integral component of membrane (GO:0016021);; Biological Process: vesicle-mediated transport (GO:0016192);;	K08486|1.7e-156|nnu:104596836|K08486 syntaxin 1B/2/3 | (RefSeq) syntaxin-132	SNARE interactions in vesicular transport (ko04130)	[U]	Intracellular trafficking, secretion, and vesicular transport	Syntaxin	Syntaxin-132 OS=Arabidopsis thaliana OX=3702 GN=SYP132 PE=1 SV=1	U	Intracellular trafficking, secretion, and vesicular transport	PREDICTED: syntaxin-132 [Nelumbo nucifera]
Nn143s44082	--	--	--	--	--	--	--	--	--	--	--	hypothetical protein GLYMA_13G011700 [Glycine max]
Nn1g00883	[E]	Amino acid transport and metabolism	Cellular Component: integral component of membrane (GO:0016021);; Molecular Function: transmembrane transporter activity (GO:0022857);;	K03294|7.1e-304|nnu:104610473|K03294 basic amino acid/polyamine antiporter, APA family | (RefSeq) cationic amino acid transporter 9, chloroplastic	--	[E]	Amino acid transport and metabolism	Amino acid permease	Cationic amino acid transporter 9, chloroplastic OS=Arabidopsis thaliana OX=3702 GN=CAT9 PE=2 SV=1	E	Amino acid transport and metabolism	PREDICTED: cationic amino acid transporter 9, chloroplastic [Nelumbo nucifera]
Nn2g12118	[G]	Carbohydrate transport and metabolism	Molecular Function: transferase activity, transferring glycosyl groups (GO:0016757);;	K06617|0.0e+00|nnu:104586132|K06617 raffinose synthase [EC:2.4.1.82] | (RefSeq) probable galactinol--sucrose galactosyltransferase 6	Galactose metabolism (ko00052)	--	--	Raffinose synthase or seed imbibition protein Sip1	Probable galactinol--sucrose galactosyltransferase 6 OS=Arabidopsis thaliana OX=3702 GN=RFS6 PE=2 SV=2	S	Function unknown	PREDICTED: probable galactinol--sucrose galactosyltransferase 6 isoform X1 [Nelumbo nucifera]
Nn2g11249	--	--	Cellular Component: Golgi apparatus (GO:0005794);; Cellular Component: integral component of membrane (GO:0016021);; Biological Process: vesicle-mediated transport (GO:0016192);;	K22940|5.3e-125|nnu:104597089|K22940 protein YIPF1/2 | (RefSeq) protein YIPF1 homolog	--	[S]	Function unknown	Yip1 domain	--	S	Function unknown	PREDICTED: protein YIPF1 homolog [Nelumbo nucifera]
Nn2g10435	--	--	Molecular Function: ATP binding (GO:0005524);; Cellular Component: nucleus (GO:0005634);;	K11643|6.1e-115|nnu:104603338|K11643 chromodomain-helicase-DNA-binding protein 4 [EC:3.6.4.12] | (RefSeq) CHD3-type chromatin-remodeling factor PICKLE	--	[R]	General function prediction only	Chromo (CHRromatin Organisation MOdifier) domain	CHD3-type chromatin-remodeling factor PICKLE OS=Arabidopsis thaliana OX=3702 GN=PKL PE=1 SV=1	--	--	PREDICTED: CHD3-type chromatin-remodeling factor PICKLE [Nelumbo nucifera]
Nn1g08680	--	--	Cellular Component: mitochondrial respiratory chain complex II, succinate dehydrogenase complex (ubiquinone) (GO:0005749);;	--	--	--	--	--	Succinate dehydrogenase subunit 6, mitochondrial OS=Arabidopsis thaliana OX=3702 GN=SDH6 PE=1 SV=1	S	Function unknown	PREDICTED: succinate dehydrogenase subunit 6, mitochondrial [Nelumbo nucifera]
Nn8g38986	[NW]	Cell motility;; Extracellular structures	Molecular Function: protein kinase activity (GO:0004672);; Molecular Function: ATP binding (GO:0005524);; Cellular Component: integral component of membrane (GO:0016021);;	K16224|5.3e-65|brp:103829497|K16224 senescence-induced receptor-like serine/threonine-protein kinase | (RefSeq) senescence-induced receptor-like serine/threonine-protein kinase isoform X2	MAPK signaling pathway - plant (ko04016);; Plant-pathogen interaction (ko04626)	--	--	Protein tyrosine and serine/threonine kinase	Probable LRR receptor-like serine/threonine-protein kinase At4g29180 OS=Arabidopsis thaliana OX=3702 GN=At4g29180 PE=1 SV=2	G	Carbohydrate transport and metabolism	PREDICTED: putative leucine-rich repeat receptor-like serine/threonine-protein kinase At2g19230, partial [Nelumbo nucifera]
Nn2g10346	--	--	Cellular Component: nuclear chromosome (GO:0000228);; Cellular Component: chromatin (GO:0000785);; Cellular Component: nuclear chromatin (GO:0000790);; Biological Process: sister chromatid segregation (GO:0000819);; Molecular Function: molecular_function (GO:0003674);; Molecular Function: chromatin binding (GO:0003682);; Molecular Function: binding (GO:0005488);; Cellular Component: cellular_comp…	--	--	[S]	Function unknown	Mini-chromosome maintenance replisome factor	Mini-chromosome maintenance complex-binding protein OS=Arabidopsis thaliana OX=3702 GN=ETG1 PE=1 SV=1	S	Function unknown	PREDICTED: mini-chromosome maintenance complex-binding protein-like isoform X2 [Nelumbo nucifera]
Nn2g11106	--	--	Molecular Function: zinc ion binding (GO:0008270);; Molecular Function: ubiquitin protein ligase activity (GO:0061630);; Biological Process: ubiquitin-dependent protein catabolic process via the N-end rule pathway (GO:0071596);;	K11978|2.4e-32|ppp:112284714|K11978 E3 ubiquitin-protein ligase UBR3 [EC:2.3.2.27] | (RefSeq) E3 ubiquitin-protein ligase PRT6-like isoform X1	--	[O]	Posttranslational modification, protein turnover, chaperones	Proteolysis_6 C-terminal	E3 ubiquitin-protein ligase PRT6 OS=Arabidopsis thaliana OX=3702 GN=PRT6 PE=1 SV=1	O	Posttranslational modification, protein turnover, chaperones	PREDICTED: E3 ubiquitin-protein ligase PRT6 isoform X4 [Nelumbo nucifera]
Nn5g27792	--	--	Molecular Function: molecular_function (GO:0003674);; Molecular Function: transcription factor activity, sequence-specific DNA binding (GO:0003700);; Cellular Component: cellular_component (GO:0005575);; Cellular Component: intracellular (GO:0005622);; Cellular Component: cell (GO:0005623);; Cellular Component: nucleus (GO:0005634);; Biological Process: regulation of transcription, DNA-templated …	K14412|4.6e-42|obr:102714333|K14412 alpha-1,4-fucosyltransferase [EC:2.4.1.65] | (RefSeq) uncharacterized LOC102714333	Various types of N-glycan biosynthesis (ko00513)	[R]	General function prediction only	--	Protein SENSITIVE TO PROTON RHIZOTOXICITY 1 OS=Arabidopsis thaliana OX=3702 GN=STOP1 PE=2 SV=1	S	Function unknown	PREDICTED: protein SENSITIVE TO PROTON RHIZOTOXICITY 1 [Nelumbo nucifera]
Nn5g27339	[R]	General function prediction only	Biological Process: autophagosome assembly (GO:0000045);; Biological Process: autophagy of mitochondrion (GO:0000422);; Biological Process: mitophagy (GO:0000423);; Molecular Function: molecular_function (GO:0003674);; Molecular Function: binding (GO:0005488);; Molecular Function: protein binding (GO:0005515);; Cellular Component: cellular_component (GO:0005575);; Cellular Component: intracellula…	K17985|3.7e-309|mdm:103453501|K17985 activating molecule in BECN1-regulated autophagy protein 1 | (RefSeq) uncharacterized protein LOC103453501 isoform X1	--	[R]	General function prediction only	WD domain, G-beta repeat	--	S	Function unknown	PREDICTED: uncharacterized protein LOC104610171 [Nelumbo nucifera]
Nn4g22967	--	--	Molecular Function: DNA binding (GO:0003677);; Cellular Component: nucleus (GO:0005634);; Molecular Function: zinc ion binding (GO:0008270);;	K08869|2.0e-24|cre:CHLREDRAFT_165812|K08869 aarF domain-containing kinase | (RefSeq) predicted protein	--	--	--	Myb-like DNA-binding domain	Transcription factor MYB1R1 OS=Solanum tuberosum OX=4113 PE=2 SV=1	K	Transcription	PREDICTED: transcription factor MYB1R1-like [Nelumbo nucifera]
Nn4g22248	[R]	General function prediction only	--	K22418|4.7e-163|nnu:104591773|K22418 11beta/17beta-hydroxysteroid dehydrogenase [EC:1.1.1.146 1.1.1.-] | (RefSeq) 11-beta-hydroxysteroid dehydrogenase 1B-like	--	[Q]	Secondary metabolites biosynthesis, transport and catabolism	short chain dehydrogenase	11-beta-hydroxysteroid dehydrogenase 1A OS=Arabidopsis thaliana OX=3702 GN=HSD1 PE=1 SV=1	Q	Secondary metabolites biosynthesis, transport and catabolism	PREDICTED: 11-beta-hydroxysteroid dehydrogenase 1B-like isoform X2 [Nelumbo nucifera]
Nn6g34643	--	--	Cellular Component: integral component of membrane (GO:0016021);;	K22736|5.7e-36|ini:109172650|K22736 vacuolar iron transporter family protein | (RefSeq) uncharacterized LOC109172650	--	--	--	--	--	--	--	PREDICTED: uncharacterized protein LOC104590574 isoform X2 [Nelumbo nucifera]
Nn7g38260	--	--	Molecular Function: DNA binding (GO:0003677);; Molecular Function: transcription factor activity, sequence-specific DNA binding (GO:0003700);; Cellular Component: nucleus (GO:0005634);;	K09286|1.4e-18|nnu:104604770|K09286 EREBP-like factor | (RefSeq) ethylene-responsive transcription factor ERF023-like	--	--	--	--	--	K	Transcription	PREDICTED: ethylene-responsive transcription factor ERF023-like [Nelumbo nucifera]
Nn2g13676	--	--	Molecular Function: molecular_function (GO:0003674);; Molecular Function: binding (GO:0005488);; Molecular Function: phospholipid binding (GO:0005543);; Molecular Function: lipid binding (GO:0008289);; Molecular Function: phosphatidylinositol-3-phosphate binding (GO:0032266);; Molecular Function: phosphatidylinositol binding (GO:0035091);; Molecular Function: ion binding (GO:0043167);; Molecular …	--	--	--	--	PH domain	Pleckstrin homology domain-containing protein 1 OS=Arabidopsis thaliana OX=3702 GN=PH1 PE=2 SV=2	T	Signal transduction mechanisms	PREDICTED: pleckstrin homology domain-containing protein 1-like [Nelumbo nucifera]
Nn7g36554	--	--	Molecular Function: protein kinase activity (GO:0004672);; Molecular Function: calcium ion binding (GO:0005509);; Molecular Function: ATP binding (GO:0005524);; Cellular Component: integral component of membrane (GO:0016021);; Molecular Function: polysaccharide binding (GO:0030247);;	--	--	--	--	Wall-associated receptor kinase galacturonan-binding	Wall-associated receptor kinase 4 OS=Arabidopsis thaliana OX=3702 GN=WAK4 PE=2 SV=1	T	Signal transduction mechanisms	PREDICTED: putative wall-associated receptor kinase-like 16 [Nelumbo nucifera]
Nn5g28741	--	--	Cellular Component: integral component of membrane (GO:0016021);; Molecular Function: transmembrane transporter activity (GO:0022857);;	--	--	--	--	EamA-like transporter family	WAT1-related protein At5g64700 OS=Arabidopsis thaliana OX=3702 GN=At5g64700 PE=2 SV=1	S	Function unknown	PREDICTED: WAT1-related protein At5g64700-like [Nelumbo nucifera]
Nn8g39856	[M]	Cell wall/membrane/envelope biogenesis	Molecular Function: protein serine/threonine kinase activity (GO:0004674);; Molecular Function: ATP binding (GO:0005524);; Biological Process: signal transduction (GO:0007165);; Cellular Component: integral component of membrane (GO:0016021);;	K07198|4.8e-65|aly:9308209|K07198 5'-AMP-activated protein kinase, catalytic alpha subunit [EC:2.7.11.11] | (RefSeq) CBL-interacting serine/threonine-protein kinase 25	--	[T]	Signal transduction mechanisms	Protein kinase domain	CBL-interacting serine/threonine-protein kinase 25 OS=Arabidopsis thaliana OX=3702 GN=CIPK25 PE=2 SV=1	T	Signal transduction mechanisms	PREDICTED: CBL-interacting serine/threonine-protein kinase 25-like [Nelumbo nucifera]
Nn4g23351	--	--	--	--	--	--	--	--	--	--	--	PREDICTED: uncharacterized protein LOC104598007 isoform X3 [Nelumbo nucifera]
Nn5g31040	--	--	Molecular Function: nucleic acid binding (GO:0003676);; Molecular Function: aspartic-type endopeptidase activity (GO:0004190);; Biological Process: DNA integration (GO:0015074);;	--	--	--	--	Retrotransposon gag protein	--	H	Coenzyme transport and metabolism	uncharacterized protein LOC107175359, partial [Citrus sinensis]
Nn2g10763	--	--	--	K06569|2.9e-265|nnu:104594831|K06569 melanoma-associated antigen p97 | (RefSeq) serotransferrin-like	--	--	--	Transferrin	--	P	Inorganic ion transport and metabolism	PREDICTED: serotransferrin-like [Nelumbo nucifera]
Nn7g36731	--	--	Molecular Function: phospholipase A2 activity (GO:0004623);; Biological Process: phospholipid metabolic process (GO:0006644);; Biological Process: arachidonic acid secretion (GO:0050482);;	--	--	--	--	--	--	S	Function unknown	PREDICTED: uncharacterized protein LOC104611351 [Nelumbo nucifera]
Nn6g33356	[V]	Defense mechanisms	Molecular Function: antiporter activity (GO:0015297);; Cellular Component: integral component of membrane (GO:0016021);; Molecular Function: xenobiotic transporter activity (GO:0042910);;	K03327|0.0e+00|nnu:104610670|K03327 multidrug resistance protein, MATE family | (RefSeq) protein DETOXIFICATION 35-like	--	[R]	General function prediction only	MatE	Protein DETOXIFICATION 34 OS=Arabidopsis thaliana OX=3702 GN=DTX34 PE=2 SV=1	V	Defense mechanisms	PREDICTED: protein DETOXIFICATION 35-like [Nelumbo nucifera]
Nn5g31350	--	--	--	--	--	--	--	--	--	S	Function unknown	hypothetical protein BC332_33811 [Capsicum chinense]
Nn7g36580	[T]	Signal transduction mechanisms	Molecular Function: solute:proton antiporter activity (GO:0015299);; Cellular Component: integral component of membrane (GO:0016021);;	--	--	[P]	Inorganic ion transport and metabolism	Sodium/hydrogen exchanger family	Cation/H(+) antiporter 15 OS=Arabidopsis thaliana OX=3702 GN=CHX15 PE=2 SV=1	P	Inorganic ion transport and metabolism	PREDICTED: cation/H(+) antiporter 15-like [Nelumbo nucifera]
Nelumbo_nucifera_newGene_604	--	--	Molecular Function: nucleic acid binding (GO:0003676);; Biological Process: DNA integration (GO:0015074);;	K19199|5.9e-18|jre:108998805|K19199 protein-histidine N-methyltransferase [EC:2.1.1.85] | (RefSeq) uncharacterized protein LOC108998805 isoform X1	--	[R]	General function prediction only	RNase H-like domain found in reverse transcriptase	--	E	Amino acid transport and metabolism	hypothetical protein F2P56_035816, partial [Juglans regia]
Nn7g38178	[G]	Carbohydrate transport and metabolism	Molecular Function: chitinase activity (GO:0004568);; Biological Process: carbohydrate metabolic process (GO:0005975);; Biological Process: chitin catabolic process (GO:0006032);; Biological Process: cell wall macromolecule catabolic process (GO:0016998);;	K20547|3.9e-42|qsu:112008707|K20547 basic endochitinase B [EC:3.2.1.14] | (RefSeq) endochitinase-like	Amino sugar and nucleotide sugar metabolism (ko00520);; MAPK signaling pathway - plant (ko04016)	[R]	General function prediction only	Chitinase class I	Chitinase-like protein 1 OS=Arabidopsis thaliana OX=3702 GN=CTL1 PE=1 SV=1	S	Function unknown	PREDICTED: chitinase-like protein 1 [Nelumbo nucifera]
Nn1g08105	--	--	Molecular Function: molecular_function (GO:0003674);; Molecular Function: nucleic acid binding (GO:0003676);; Molecular Function: RNA binding (GO:0003723);; Molecular Function: catalytic activity (GO:0003824);; Molecular Function: nuclease activity (GO:0004518);; Molecular Function: endonuclease activity (GO:0004519);; Molecular Function: binding (GO:0005488);; Cellular Component: cellular_compon…	--	--	--	--	--	--	S	Function unknown	PREDICTED: pentatricopeptide repeat-containing protein At1g11900 isoform X1 [Nelumbo nucifera]
Nn6g33114	--	--	--	--	--	--	--	--	--	--	--	hypothetical protein LR48_Vigan05g084500 [Vigna angularis]
Nn058s41957	--	--	--	--	--	--	--	--	--	--	--	uncharacterized protein LOC118033973 [Populus alba]
Nn1g04575	--	--	--	--	--	--	--	--	--	S	Function unknown	PREDICTED: uncharacterized protein LOC104599411 [Nelumbo nucifera]
Nn6g34393	--	--	Molecular Function: protein kinase activity (GO:0004672);; Molecular Function: ATP binding (GO:0005524);;	K13416|3.8e-16|oeu:111394691|K13416 brassinosteroid insensitive 1-associated receptor kinase 1 [EC:2.7.10.1 2.7.11.1] | (RefSeq) BRASSINOSTEROID INSENSITIVE 1-associated receptor kinase 1-like isoform X1	MAPK signaling pathway - plant (ko04016);; Plant hormone signal transduction (ko04075);; Plant-pathogen interaction (ko04626)	--	--	Protein tyrosine and serine/threonine kinase	Probable LRR receptor-like serine/threonine-protein kinase At1g53440 OS=Arabidopsis thaliana OX=3702 GN=At1g53440 PE=2 SV=2	T	Signal transduction mechanisms	PREDICTED: probable LRR receptor-like serine/threonine-protein kinase At1g53440 [Nelumbo nucifera]
Nn8g38641	--	--	Molecular Function: G-protein coupled receptor binding (GO:0001664);; Molecular Function: GTPase activity (GO:0003924);; Molecular Function: GTP binding (GO:0005525);; Cellular Component: heterotrimeric G-protein complex (GO:0005834);; Biological Process: adenylate cyclase-modulating G-protein coupled receptor signaling pathway (GO:0007188);; Molecular Function: G-protein beta/gamma-subunit compl…	K19729|3.0e-221|nnu:104600554|K19729 guanine nucleotide-binding protein G(t) subunit alpha 3 | (RefSeq) guanine nucleotide-binding protein alpha-1 subunit	--	[DT]	Cell cycle control, cell division, chromosome partitioning;; Signal transduction mechanisms	G-protein alpha subunit	Guanine nucleotide-binding protein alpha-1 subunit OS=Pisum sativum OX=3888 GN=GPA1 PE=2 SV=1	--	--	PREDICTED: guanine nucleotide-binding protein alpha-1 subunit [Nelumbo nucifera]
Nn2g12465	--	--	Molecular Function: protein binding (GO:0005515);;	K04079|9.1e-10|ccaj:109791684|K04079 molecular chaperone HtpG | (RefSeq) F-box/kelch-repeat protein At3g06240-like isoform X1	Protein processing in endoplasmic reticulum (ko04141);; Plant-pathogen interaction (ko04626)	--	--	F-box associated domain	Putative F-box protein At1g50870 OS=Arabidopsis thaliana OX=3702 GN=At1g50870 PE=4 SV=1	S	Function unknown	PREDICTED: putative F-box protein At5g52610 [Nelumbo nucifera]
Nn4g24341	--	--	Molecular Function: methyltransferase activity (GO:0008168);; Biological Process: methylation (GO:0032259);;	K21806|1.9e-32|nnu:104589084|K21806 protein N-lysine methyltransferase METTL21D [EC:2.1.1.-] | (RefSeq) protein-lysine methyltransferase METTL21D	--	[A]	RNA processing and modification	Lysine methyltransferase	--	A	RNA processing and modification	PREDICTED: protein-lysine methyltransferase METTL21D [Nelumbo nucifera]
Nn6g34328	[G]	Carbohydrate transport and metabolism	Molecular Function: magnesium ion binding (GO:0000287);; Biological Process: carbohydrate metabolic process (GO:0005975);; Molecular Function: intramolecular transferase activity, phosphotransferases (GO:0016868);;	K01835|0.0e+00|nnu:104608353|K01835 phosphoglucomutase [EC:5.4.2.2] | (RefSeq) phosphoglucomutase, chloroplastic	Glycolysis / Gluconeogenesis (ko00010);; Pentose phosphate pathway (ko00030);; Galactose metabolism (ko00052);; Purine metabolism (ko00230);; Starch and sucrose metabolism (ko00500);; Amino sugar and nucleotide sugar metabolism (ko00520)	[G]	Carbohydrate transport and metabolism	Phosphoglucomutase/phosphomannomutase, alpha/beta/alpha domain I	Phosphoglucomutase, chloroplastic OS=Arabidopsis thaliana OX=3702 GN=PGMP PE=1 SV=2	G	Carbohydrate transport and metabolism	PREDICTED: phosphoglucomutase, chloroplastic isoform X1 [Nelumbo nucifera]
Nn6g32814	--	--	--	--	--	--	--	--	--	--	--	hypothetical protein CICLE_v10029531mg [Citrus clementina]
Nn4g24495	[R]	General function prediction only	Molecular Function: oxidoreductase activity (GO:0016491);;	--	--	[GQ]	Carbohydrate transport and metabolism;; Secondary metabolites biosynthesis, transport and catabolism	Oxidoreductase family, NAD-binding Rossmann fold	Uncharacterized oxidoreductase At4g09670 OS=Arabidopsis thaliana OX=3702 GN=At4g09670 PE=1 SV=1	--	--	PREDICTED: uncharacterized oxidoreductase At4g09670-like [Nelumbo nucifera]
Nn7g35874	--	--	Molecular Function: translation initiation factor activity (GO:0003743);; Cellular Component: cytoplasm (GO:0005737);;	K03259|7.0e-125|nnu:104597662|K03259 translation initiation factor 4E | (RefSeq) eukaryotic translation initiation factor NCBP-like	RNA transport (ko03013)	[J]	Translation, ribosomal structure and biogenesis	Eukaryotic initiation factor 4E	Eukaryotic translation initiation factor NCBP OS=Oryza sativa subsp. japonica OX=39947 GN=NCBP PE=2 SV=1	J	Translation, ribosomal structure and biogenesis	PREDICTED: eukaryotic translation initiation factor NCBP-like [Nelumbo nucifera]
Nn7g37022	[K]	Transcription	Molecular Function: DNA binding (GO:0003677);; Molecular Function: DNA-directed 5'-3' RNA polymerase activity (GO:0003899);; Biological Process: transcription, DNA-templated (GO:0006351);; Molecular Function: zinc ion binding (GO:0008270);; Cellular Component: host cell nucleus (GO:0042025);;	K02999|0.0e+00|nnu:104593642|K02999 DNA-directed RNA polymerase I subunit RPA1 [EC:2.7.7.6] | (RefSeq) DNA-directed RNA polymerase I subunit 1	RNA polymerase (ko03020)	[K]	Transcription	RNA polymerase Rpb1, domain 5	DNA-directed RNA polymerase I subunit 1 OS=Arabidopsis thaliana OX=3702 GN=NRPA1 PE=3 SV=1	K	Transcription	PREDICTED: DNA-directed RNA polymerase I subunit 1 [Nelumbo nucifera]
Nn2g14981	--	--	--	--	--	--	--	--	--	--	--	PREDICTED: stress response protein NST1-like isoform X2 [Nelumbo nucifera]
Nn2g10343	--	--	Biological Process: response to red or far red light (GO:0009639);; Biological Process: negative gravitropism (GO:0009959);;	--	--	--	--	Plant protein of unknown function (DUF641)	--	S	Function unknown	PREDICTED: uncharacterized protein LOC104594519 [Nelumbo nucifera]
Nn1g08615	--	--	Molecular Function: RNA binding (GO:0003723);;	--	--	--	--	RNA recognition motif. (a.k.a. RRM, RBD, or RNP domain)	--	--	--	PREDICTED: uncharacterized protein LOC104589758 [Nelumbo nucifera]
Nn5g30372	--	--	Molecular Function: microtubule motor activity (GO:0003777);; Molecular Function: ATP binding (GO:0005524);; Biological Process: microtubule-based movement (GO:0007018);; Molecular Function: microtubule binding (GO:0008017);;	K18806|1.2e-88|mis:MICPUN_63076|K18806 kinesin family member 7 | (RefSeq) predicted protein	--	[Z]	Cytoskeleton	Kinesin motor domain	Kinesin-like protein KIN-4A OS=Gossypium hirsutum OX=3635 GN=KIN4A PE=2 SV=1	Z	Cytoskeleton	PREDICTED: kinesin-like protein KIN-4A isoform X2 [Nelumbo nucifera]
Nn2g14238	--	--	Cellular Component: integral component of membrane (GO:0016021);;	K14332|7.6e-70|nnu:104601342|K14332 photosystem I subunit PsaO | (RefSeq) photosystem I subunit O	Photosynthesis (ko00195)	--	--	--	Photosystem I subunit O OS=Arabidopsis thaliana OX=3702 GN=PSAO PE=1 SV=1	S	Function unknown	PREDICTED: photosystem I subunit O [Nelumbo nucifera]
Nn5g28093	--	--	Molecular Function: nutrient reservoir activity (GO:0045735);;	--	--	--	--	Cupin	11S globulin seed storage protein 1 OS=Carya illinoinensis OX=32201 PE=1 SV=1	O	Posttranslational modification, protein turnover, chaperones	PREDICTED: legumin B-like [Nelumbo nucifera]
Nn2g10571	--	--	Cellular Component: Ino80 complex (GO:0031011);;	K11671|0.0e+00|nnu:104594699|K11671 nuclear factor related to kappa-B-binding protein | (RefSeq) uncharacterized LOC104594699	--	[K]	Transcription	--	--	K	Transcription	PREDICTED: uncharacterized protein LOC104594699 [Nelumbo nucifera]
Nn1g01368	--	--	Biological Process: reproduction (GO:0000003);; Biological Process: response to hypoxia (GO:0001666);; Biological Process: developmental process involved in reproduction (GO:0003006);; Molecular Function: molecular_function (GO:0003674);; Molecular Function: nucleic acid binding (GO:0003676);; Molecular Function: DNA binding (GO:0003677);; Molecular Function: binding (GO:0005488);; Molecular Func…	--	--	--	--	LIM-domain binding protein	Probable transcriptional regulator SLK2 OS=Arabidopsis thaliana OX=3702 GN=SLK2 PE=1 SV=1	K	Transcription	PREDICTED: probable transcriptional regulator SLK2 [Nelumbo nucifera]
Nn3g20471	--	--	--	--	--	--	--	--	--	--	--	hypothetical protein CK203_055982 [Vitis vinifera]
Nn2g10610	[J]	Translation, ribosomal structure and biogenesis	Cellular Component: ribosome (GO:0005840);; Biological Process: ribosome biogenesis (GO:0042254);;	K02864|5.7e-116|nnu:104594722|K02864 large subunit ribosomal protein L10 | (RefSeq) 50S ribosomal protein L10, chloroplastic-like	Ribosome (ko03010)	--	--	Ribosomal protein L10	50S ribosomal protein L10, chloroplastic OS=Nicotiana tabacum OX=4097 GN=RPL10 PE=2 SV=1	J	Translation, ribosomal structure and biogenesis	PREDICTED: 50S ribosomal protein L10, chloroplastic-like [Nelumbo nucifera]
Nn7g37341	--	--	Molecular Function: molecular_function (GO:0003674);; Molecular Function: catalytic activity (GO:0003824);; Molecular Function: ubiquitin-protein transferase activity (GO:0004842);; Molecular Function: protein binding (GO:0005515);; Biological Process: cellular protein modification process (GO:0006464);; Biological Process: nitrogen compound metabolic process (GO:0006807);; Biological Process: mu…	--	--	--	--	F-box domain	F-box/kelch-repeat protein At3g61590 OS=Arabidopsis thaliana OX=3702 GN=At3g61590 PE=1 SV=1	S	Function unknown	PREDICTED: F-box/kelch-repeat protein At3g61590-like [Nelumbo nucifera]
Nn3g19259	[H]	Coenzyme transport and metabolism	Molecular Function: alternative oxidase activity (GO:0009916);; Cellular Component: integral component of membrane (GO:0016021);; Molecular Function: metal ion binding (GO:0046872);; Cellular Component: respiratory chain (GO:0070469);; Molecular Function: ubiquinol:oxygen oxidoreductase activity (GO:0102721);;	K17893|1.2e-204|nnu:104612872|K17893 ubiquinol oxidase [EC:1.10.3.11] | (RefSeq) ubiquinol oxidase 2, mitochondrial-like	--	--	--	Alternative oxidase	Ubiquinol oxidase 1, mitochondrial OS=Nicotiana tabacum OX=4097 GN=AOX1 PE=1 SV=1	C	Energy production and conversion	PREDICTED: ubiquinol oxidase 2, mitochondrial-like [Nelumbo nucifera]
Nn3g21884	--	--	Molecular Function: peroxidase activity (GO:0004601);; Cellular Component: extracellular region (GO:0005576);; Biological Process: response to oxidative stress (GO:0006979);; Molecular Function: heme binding (GO:0020037);; Biological Process: hydrogen peroxide catabolic process (GO:0042744);; Molecular Function: metal ion binding (GO:0046872);;	K00430|1.7e-193|nnu:104607212|K00430 peroxidase [EC:1.11.1.7] | (RefSeq) peroxidase 5-like	Phenylpropanoid biosynthesis (ko00940)	--	--	Peroxidase	Peroxidase 5 OS=Vitis vinifera OX=29760 GN=GSVIVT00037159001 PE=1 SV=2	Q	Secondary metabolites biosynthesis, transport and catabolism	PREDICTED: peroxidase 5-like [Nelumbo nucifera]
Nn2g13586	--	--	Cellular Component: endoplasmic reticulum membrane (GO:0005789);; Cellular Component: integral component of membrane (GO:0016021);;	K20723|1.6e-64|nnu:104601185|K20723 reticulon-3 | (RefSeq) reticulon-like protein B12	--	[U]	Intracellular trafficking, secretion, and vesicular transport	Reticulon	Reticulon-like protein B12 OS=Arabidopsis thaliana OX=3702 GN=RTNLB12 PE=2 SV=1	U	Intracellular trafficking, secretion, and vesicular transport	PREDICTED: reticulon-like protein B12 [Nelumbo nucifera]
Nn1g00126	--	--	Cellular Component: integral component of membrane (GO:0016021);;	K19041|4.1e-63|cmax:111498996|K19041 E3 ubiquitin-protein ligase RNF38/44 [EC:2.3.2.27] | (RefSeq) RING-H2 finger protein ATL52-like	--	[O]	Posttranslational modification, protein turnover, chaperones	Ring finger domain	E3 ubiquitin-protein ligase Os04g0590900 OS=Oryza sativa subsp. japonica OX=39947 GN=Os04g0590900 PE=2 SV=2	O	Posttranslational modification, protein turnover, chaperones	PREDICTED: E3 ubiquitin-protein ligase Os04g0590900 [Nelumbo nucifera]
Nn209s45147	--	--	--	--	--	--	--	--	--	--	--	predicted protein [Micromonas pusilla CCMP1545]
Nn3g21089	[L]	Replication, recombination and repair	Molecular Function: DNA binding (GO:0003677);; Molecular Function: DNA-directed DNA polymerase activity (GO:0003887);; Molecular Function: ATP binding (GO:0005524);; Biological Process: DNA replication (GO:0006260);; Cellular Component: DNA polymerase III complex (GO:0009360);;	K10755|6.3e-12|vcn:VOLCADRAFT_56553|K10755 replication factor C subunit 2/4 | (RefSeq) rfc4; DNA replication factor C complex subunit 4	DNA replication (ko03030);; Nucleotide excision repair (ko03420);; Mismatch repair (ko03430)	[L]	Replication, recombination and repair	DNA polymerase III, delta subunit	Protein STICHEL-like 3 OS=Arabidopsis thaliana OX=3702 GN=At4g18820 PE=3 SV=1	L	Replication, recombination and repair	PREDICTED: protein STICHEL-like 3 isoform X3 [Nelumbo nucifera]
Nn430s46638	--	--	--	--	--	--	--	--	--	S	Function unknown	hypothetical protein CQW23_35335 [Capsicum baccatum]
Nn2g10680	--	--	Molecular Function: RNA ligase (ATP) activity (GO:0003972);; Molecular Function: ATP binding (GO:0005524);; Biological Process: tRNA splicing, via endonucleolytic cleavage and ligation (GO:0006388);;	--	--	--	--	Fungal tRNA ligase phosphodiesterase domain	tRNA ligase 1 OS=Arabidopsis thaliana OX=3702 GN=RNL PE=1 SV=1	S	Function unknown	PREDICTED: uncharacterized protein LOC104594775 [Nelumbo nucifera]
Nn3g20226	--	--	--	K20818|4.0e-81|nnu:104590507|K20818 KxDL motif-containing protein 1 | (RefSeq) kxDL motif-containing protein 1	--	[S]	Function unknown	Uncharacterized conserved protein	--	S	Function unknown	PREDICTED: kxDL motif-containing protein 1 [Nelumbo nucifera]
Nn4g24321	--	--	Cellular Component: integral component of membrane (GO:0016021);;	--	--	--	--	Salt stress response/antifungal	Plasmodesmata-located protein 7 OS=Arabidopsis thaliana OX=3702 GN=PDLP7 PE=1 SV=1	S	Function unknown	PREDICTED: cysteine-rich repeat secretory protein 60-like [Nelumbo nucifera]
Nn6g33794	[J]	Translation, ribosomal structure and biogenesis	Molecular Function: structural constituent of ribosome (GO:0003735);; Cellular Component: ribosome (GO:0005840);; Biological Process: translation (GO:0006412);;	K02884|9.7e-122|nnu:104598409|K02884 large subunit ribosomal protein L19 | (RefSeq) 50S ribosomal protein L19-2, chloroplastic-like	Ribosome (ko03010)	[J]	Translation, ribosomal structure and biogenesis	Ribosomal protein L19	50S ribosomal protein L19-2, chloroplastic OS=Arabidopsis thaliana OX=3702 GN=At5g47190 PE=2 SV=1	J	Translation, ribosomal structure and biogenesis	PREDICTED: 50S ribosomal protein L19-2, chloroplastic-like [Nelumbo nucifera]
Nn2g12217	--	--	Molecular Function: zinc ion binding (GO:0008270);;	--	--	--	--	PLATZ transcription factor	--	S	Function unknown	PREDICTED: uncharacterized protein LOC104588578 [Nelumbo nucifera]
Nn046s41854	--	--	Cellular Component: integral component of membrane (GO:0016021);; Molecular Function: transmembrane transporter activity (GO:0022857);;	--	--	--	--	--	--	--	--	hypothetical protein VITISV_012740 [Vitis vinifera]
Nn5g29207	--	--	--	--	--	--	--	--	--	--	--	PREDICTED: uncharacterized protein LOC104607530 [Nelumbo nucifera]
Nn3g21170	--	--	Cellular Component: integral component of membrane (GO:0016021);;	--	--	--	--	Family of unknown function (DUF716)	--	S	Function unknown	PREDICTED: transmembrane protein 45B [Nelumbo nucifera]
Nn3g20404	--	--	--	--	--	--	--	Myb/SANT-like DNA-binding domain	--	S	Function unknown	PREDICTED: L10-interacting MYB domain-containing protein-like [Nelumbo nucifera]
Nn7g36154	[P]	Inorganic ion transport and metabolism	Molecular Function: copper ion binding (GO:0005507);; Molecular Function: ATP binding (GO:0005524);; Cellular Component: integral component of membrane (GO:0016021);; Molecular Function: cation-transporting ATPase activity (GO:0019829);; Biological Process: metal ion transport (GO:0030001);;	K17686|0.0e+00|nnu:104597452|K17686 P-type Cu+ transporter [EC:7.2.2.8] | (RefSeq) probable copper-transporting ATPase HMA5	MAPK signaling pathway - plant (ko04016)	[P]	Inorganic ion transport and metabolism	E1-E2 ATPase	Copper-transporting ATPase HMA4 OS=Oryza sativa subsp. japonica OX=39947 GN=HMA4 PE=1 SV=1	P	Inorganic ion transport and metabolism	PREDICTED: probable copper-transporting ATPase HMA5 [Nelumbo nucifera]
Nn3g17710	--	--	Molecular Function: acid phosphatase activity (GO:0003993);; Molecular Function: metal ion binding (GO:0046872);;	K22390|5.8e-18|nnu:104597949|K22390 acid phosphatase type 7 | (RefSeq) probable inactive purple acid phosphatase 1	--	[G]	Carbohydrate transport and metabolism	--	Probable inactive purple acid phosphatase 1 OS=Arabidopsis thaliana OX=3702 GN=PAP1 PE=2 SV=1	G	Carbohydrate transport and metabolism	PREDICTED: probable inactive purple acid phosphatase 1 [Nelumbo nucifera]
Nn6g34943	--	--	Molecular Function: nucleic acid binding (GO:0003676);;	K14771|2.5e-10|vcn:VOLCADRAFT_116880|K14771 U3 small nucleolar RNA-associated protein 19 | (RefSeq) hypothetical protein	--	[A]	RNA processing and modification	R3H domain	--	A	RNA processing and modification	PREDICTED: cAMP-regulated phosphoprotein 21-like [Nelumbo nucifera]
Nn2g14895	[G]	Carbohydrate transport and metabolism	Molecular Function: UDP-glycosyltransferase activity (GO:0008194);;	K22845|3.3e-267|nnu:104590057|K22845 phlorizin synthase [EC:2.4.1.357] | (RefSeq) UDP-glycosyltransferase 88F3-like	Flavonoid biosynthesis (ko00941)	[GC]	Carbohydrate transport and metabolism;; Energy production and conversion	UDP-glucoronosyl and UDP-glucosyl transferase	UDP-glycosyltransferase 88F3 OS=Pyrus communis OX=23211 GN=UGT88F3 PE=2 SV=1	--	--	PREDICTED: UDP-glycosyltransferase 88F3-like [Nelumbo nucifera]
Nn8g40909	--	--	Biological Process: nuclear-transcribed mRNA catabolic process, deadenylation-dependent decay (GO:0000288);; Biological Process: nuclear-transcribed mRNA catabolic process, exonucleolytic (GO:0000291);; Cellular Component: chromatin (GO:0000785);; Biological Process: nuclear-transcribed mRNA catabolic process (GO:0000956);; Cellular Component: cellular_component (GO:0005575);; Cellular Component:…	K00703|2.9e-13|nnu:104589519|K00703 starch synthase [EC:2.4.1.21] | (RefSeq) granule-bound starch synthase 2, chloroplastic/amyloplastic-like	Starch and sucrose metabolism (ko00500)	[R]	General function prediction only	Tetratricopeptide repeat	--	E	Amino acid transport and metabolism	PREDICTED: uncharacterized protein LOC109114545 [Nelumbo nucifera]
Nn122s43482	--	--	--	--	--	--	--	--	--	--	--	uncharacterized protein LOC115972856 [Quercus lobata]
Nn6g31830	--	--	Cellular Component: integral component of membrane (GO:0016021);;	--	--	--	--	--	--	--	--	PREDICTED: uncharacterized protein LOC104604358 [Nelumbo nucifera]
Nn2g11617	[O]	Posttranslational modification, protein turnover, chaperones	Molecular Function: metalloendopeptidase activity (GO:0004222);; Molecular Function: ATP binding (GO:0005524);;	K03798|1.0e-80|ccp:CHC_T00009248001|K03798 cell division protease FtsH [EC:3.4.24.-] | (RefSeq) cell division protein FtsH	--	[O]	Posttranslational modification, protein turnover, chaperones	ATPase family associated with various cellular activities (AAA)	Probable inactive ATP-dependent zinc metalloprotease FTSHI 2, chloroplastic OS=Arabidopsis thaliana OX=3702 GN=FTSHI2 PE=1 SV=1	O	Posttranslational modification, protein turnover, chaperones	PREDICTED: probable inactive ATP-dependent zinc metalloprotease FTSHI 2, chloroplastic [Nelumbo nucifera]
Nn7g37904	--	--	--	--	--	[S]	Function unknown	--	--	G	Carbohydrate transport and metabolism	PREDICTED: uncharacterized protein LOC104609514 [Nelumbo nucifera]
Nn1g00303	--	--	Biological Process: response to acid chemical (GO:0001101);; Molecular Function: molecular_function (GO:0003674);; Molecular Function: catalytic activity (GO:0003824);; Molecular Function: thiol-dependent ubiquitin-specific protease activity (GO:0004843);; Cellular Component: cellular_component (GO:0005575);; Cellular Component: intracellular (GO:0005622);; Cellular Component: cell (GO:0005623);;…	--	--	[DR]	Cell cycle control, cell division, chromosome partitioning;; General function prediction only	--	--	D	Cell cycle control, cell division, chromosome partitioning	PREDICTED: uncharacterized protein LOC104604818 [Nelumbo nucifera]
Nn4g23633	--	--	Molecular Function: molecular_function (GO:0003674);; Molecular Function: catalytic activity (GO:0003824);; Molecular Function: ubiquitin-protein transferase activity (GO:0004842);; Biological Process: cellular protein modification process (GO:0006464);; Biological Process: proteolysis (GO:0006508);; Biological Process: ubiquitin-dependent protein catabolic process (GO:0006511);; Biological Proce…	K16282|2.6e-28|vvi:104878969|K16282 E3 ubiquitin-protein ligase RHA2 [EC:2.3.2.27] | (RefSeq) E3 ubiquitin-protein ligase RHA2B-like	--	[O]	Posttranslational modification, protein turnover, chaperones	Ring finger domain	Probable E3 ubiquitin-protein ligase XERICO OS=Arabidopsis thaliana OX=3702 GN=XERICO PE=1 SV=1	O	Posttranslational modification, protein turnover, chaperones	RING-H2 finger protein ATL51-like [Vitis riparia]
Nn2g10841	--	--	Molecular Function: nutrient reservoir activity (GO:0045735);;	--	--	--	--	Cupin	Vicilin Jug r 2.0101 (Fragment) OS=Juglans regia OX=51240 PE=1 SV=1	S	Function unknown	PREDICTED: vicilin-like antimicrobial peptides 2-2 [Nelumbo nucifera]
Nn8g41171	[J]	Translation, ribosomal structure and biogenesis	Molecular Function: nucleic acid binding (GO:0003676);; Molecular Function: aspartate-tRNA ligase activity (GO:0004815);; Molecular Function: ATP binding (GO:0005524);; Cellular Component: cytoplasm (GO:0005737);; Biological Process: aspartyl-tRNA aminoacylation (GO:0006422);;	K22503|8.0e-32|nnu:104611773|K22503 aspartyl-tRNA synthetase [EC:6.1.1.12] | (RefSeq) aspartate--tRNA ligase 2, cytoplasmic-like	Aminoacyl-tRNA biosynthesis (ko00970)	[J]	Translation, ribosomal structure and biogenesis	tRNA synthetases class II (D, K and N)	Aspartate--tRNA ligase 2, cytoplasmic OS=Arabidopsis thaliana OX=3702 GN=IBI1 PE=1 SV=1	J	Translation, ribosomal structure and biogenesis	PREDICTED: aspartate--tRNA ligase 2, cytoplasmic-like [Nelumbo nucifera]
Nn8g40392	[R]	General function prediction only	Molecular Function: phosphoglycerate dehydrogenase activity (GO:0004617);; Biological Process: L-serine biosynthetic process (GO:0006564);; Molecular Function: NAD binding (GO:0051287);;	K00058|3.3e-287|nnu:104603133|K00058 D-3-phosphoglycerate dehydrogenase / 2-oxoglutarate reductase [EC:1.1.1.95 1.1.1.399] | (RefSeq) D-3-phosphoglycerate dehydrogenase 1, chloroplastic-like	Glycine, serine and threonine metabolism (ko00260);; Cysteine and methionine metabolism (ko00270);; Carbon metabolism (ko01200);; Biosynthesis of amino acids (ko01230)	[E]	Amino acid transport and metabolism	D-isomer specific 2-hydroxyacid dehydrogenase, NAD binding domain	D-3-phosphoglycerate dehydrogenase 2, chloroplastic OS=Arabidopsis thaliana OX=3702 GN=PGDH2 PE=1 SV=2	E	Amino acid transport and metabolism	PREDICTED: D-3-phosphoglycerate dehydrogenase 1, chloroplastic-like [Nelumbo nucifera]
Nn1g06096	--	--	--	--	--	--	--	--	--	L	Replication, recombination and repair	--
Nn2g12995	--	--	Molecular Function: structural constituent of ribosome (GO:0003735);; Biological Process: translation (GO:0006412);; Cellular Component: small ribosomal subunit (GO:0015935);;	K02973|1.8e-23|cmax:111483580|K02973 small subunit ribosomal protein S23e | (RefSeq) 40S ribosomal protein S23-like	Ribosome (ko03010)	[J]	Translation, ribosomal structure and biogenesis	--	40S ribosomal protein S23 OS=Fragaria ananassa OX=3747 GN=RPS23 PE=2 SV=1	J	Translation, ribosomal structure and biogenesis	hypothetical protein CMV_027526, partial [Castanea mollissima]
Nn1g09535	--	--	Biological Process: Group II intron splicing (GO:0000373);; Biological Process: RNA splicing, via transesterification reactions (GO:0000375);; Biological Process: RNA splicing, via transesterification reactions with bulged adenosine as nucleophile (GO:0000377);; Molecular Function: molecular_function (GO:0003674);; Molecular Function: nucleic acid binding (GO:0003676);; Molecular Function: RNA bi…	K15111|4.1e-19|spen:107015750|K15111 solute carrier family 25 (mitochondrial S-adenosylmethionine transporter), member 26 | (RefSeq) LOW QUALITY PROTEIN: protein MITOFERRINLIKE 1, chloroplastic	--	--	--	Plant organelle RNA recognition domain	Protein WHAT'S THIS FACTOR 1 homolog, chloroplastic OS=Oryza sativa subsp. japonica OX=39947 GN=Os05g0571100 PE=2 SV=1	S	Function unknown	PREDICTED: protein ROOT PRIMORDIUM DEFECTIVE 1 [Nelumbo nucifera]
Nn2g10364	--	--	--	--	--	--	--	--	Outer envelope pore protein 16, chloroplastic OS=Pisum sativum OX=3888 GN=OEP16 PE=1 SV=1	U	Intracellular trafficking, secretion, and vesicular transport	PREDICTED: outer envelope pore protein 16, chloroplastic-like [Nelumbo nucifera]
Nn090s42827	--	--	--	--	--	--	--	--	--	S	Function unknown	hypothetical protein CQW23_35335 [Capsicum baccatum]
Nn6g34151	--	--	--	--	--	--	--	--	--	--	--	PREDICTED: uncharacterized protein LOC104598658 [Nelumbo nucifera]
Nn7g37702	[L]	Replication, recombination and repair	Molecular Function: nucleic acid binding (GO:0003676);; Molecular Function: helicase activity (GO:0004386);; Molecular Function: ATP binding (GO:0005524);;	K16911|9.8e-182|ccaj:109805117|K16911 ATP-dependent RNA helicase DDX21 [EC:3.6.4.13] | (RefSeq) DEAD-box ATP-dependent RNA helicase 53-like	--	[A]	RNA processing and modification	DEAD/DEAH box helicase	DEAD-box ATP-dependent RNA helicase 53, mitochondrial OS=Arabidopsis thaliana OX=3702 GN=RH53 PE=1 SV=1	A	RNA processing and modification	PREDICTED: DEAD-box ATP-dependent RNA helicase 53-like [Nelumbo nucifera]
Nn3g19344	--	--	Molecular Function: molecular_function (GO:0003674);; Molecular Function: nucleic acid binding (GO:0003676);; Molecular Function: DNA binding (GO:0003677);; Molecular Function: binding (GO:0005488);; Cellular Component: cellular_component (GO:0005575);; Cellular Component: intracellular (GO:0005622);; Cellular Component: cell (GO:0005623);; Cellular Component: nucleus (GO:0005634);; Biological Pr…	K08835|2.9e-14|ppp:112289801|K08835 serine/threonine-protein kinase OSR1/STK39 [EC:2.7.11.1] | (RefSeq) serine/threonine-protein kinase 24-like	--	--	--	GAGA binding protein-like family	Protein BASIC PENTACYSTEINE7 OS=Arabidopsis thaliana OX=3702 GN=BPC7 PE=1 SV=1	S	Function unknown	PREDICTED: protein BASIC PENTACYSTEINE7-like [Nelumbo nucifera]
Nn3g17381	--	--	--	--	--	--	--	Remorin, C-terminal region	--	S	Function unknown	PREDICTED: remorin-like isoform X1 [Nelumbo nucifera]
Nn3g17066	[T]	Signal transduction mechanisms	Molecular Function: phosphoprotein phosphatase activity (GO:0004721);;	K04382|8.6e-151|nnu:104596284|K04382 serine/threonine-protein phosphatase 2A catalytic subunit [EC:3.1.3.16] | (RefSeq) serine/threonine-protein phosphatase PP2A catalytic subunit	mRNA surveillance pathway (ko03015);; Autophagy - other (ko04136)	[T]	Signal transduction mechanisms	Calcineurin-like phosphoesterase	Serine/threonine-protein phosphatase PP2A catalytic subunit OS=Hevea brasiliensis OX=3981 GN=PP2A PE=2 SV=1	T	Signal transduction mechanisms	PREDICTED: serine/threonine-protein phosphatase PP2A catalytic subunit [Nelumbo nucifera]
Nn5g27965	--	--	--	--	--	--	--	--	--	--	--	PREDICTED: uncharacterized protein LOC104588732 isoform X2 [Nelumbo nucifera]
Nn104s43175	--	--	--	--	--	--	--	--	--	--	--	predicted protein [Micromonas pusilla CCMP1545]
Nn1g05867	[R]	General function prediction only	Biological Process: lipid catabolic process (GO:0016042);; Molecular Function: hydrolase activity (GO:0016787);;	K16815|2.0e-07|cme:CYME_CMT312C|K16815 calcium-independent phospholipase A2-gamma | (RefSeq) membrane-associated calcium-independent phospholipase A2	--	[I]	Lipid transport and metabolism	Patatin-like phospholipase	Patatin-like protein 2 OS=Arabidopsis thaliana OX=3702 GN=PLP2 PE=1 SV=1	I	Lipid transport and metabolism	PREDICTED: patatin-like protein 2 [Nelumbo nucifera]
Nn038s41637	--	--	--	--	--	--	--	--	--	--	--	unnamed protein product [Prunus armeniaca]
Nn5g28207	--	--	Cellular Component: endoplasmic reticulum membrane (GO:0005789);; Cellular Component: integral component of membrane (GO:0016021);;	K20352|2.4e-116|nnu:104608476|K20352 p24 family protein delta-1 | (RefSeq) transmembrane emp24 domain-containing protein p24delta3-like	--	[U]	Intracellular trafficking, secretion, and vesicular transport	emp24/gp25L/p24 family/GOLD	Transmembrane emp24 domain-containing protein p24delta3 OS=Arabidopsis thaliana OX=3702 GN=At1g09580 PE=1 SV=1	U	Intracellular trafficking, secretion, and vesicular transport	PREDICTED: transmembrane emp24 domain-containing protein p24delta3-like [Nelumbo nucifera]
Nn2g14987	--	--	Molecular Function: DNA binding (GO:0003677);; Cellular Component: nucleus (GO:0005634);; Molecular Function: protein dimerization activity (GO:0046983);;	--	--	--	--	SRF-type transcription factor (DNA-binding and dimerisation domain)	--	--	--	PREDICTED: agamous-like MADS-box protein AGL82 [Nelumbo nucifera]
Nn217s45264	--	--	--	--	--	--	--	--	--	--	--	predicted protein [Micromonas pusilla CCMP1545]
Nn6g33148	--	--	--	--	--	--	--	--	--	--	--	rRNA intron-encoded homing endonuclease [Gossypium australe]
Nn2g13144	--	--	Molecular Function: transcription factor activity, sequence-specific DNA binding (GO:0003700);; Cellular Component: nucleus (GO:0005634);; Molecular Function: sequence-specific DNA binding (GO:0043565);;	--	--	[K]	Transcription	--	Trihelix transcription factor GT-3b OS=Arabidopsis thaliana OX=3702 GN=GT-3B PE=1 SV=1	K	Transcription	PREDICTED: trihelix transcription factor GT-3b-like isoform X1 [Nelumbo nucifera]
Nn3g16967	[N]	Cell motility	Cellular Component: integral component of membrane (GO:0016021);; Molecular Function: transferase activity (GO:0016740);;	K20887|0.0e+00|nnu:104595557|K20887 xyloglucan glycosyltransferase 4 [EC:2.4.1.-] | (RefSeq) xyloglucan glycosyltransferase 4	--	--	--	Glycosyl transferase family group 2	Xyloglucan glycosyltransferase 4 OS=Arabidopsis thaliana OX=3702 GN=CSLC4 PE=1 SV=1	M	Cell wall/membrane/envelope biogenesis	PREDICTED: xyloglucan glycosyltransferase 4 [Nelumbo nucifera]
Nn3g21810	--	--	Molecular Function: pectinesterase activity (GO:0030599);; Biological Process: cell wall modification (GO:0042545);; Molecular Function: aspartyl esterase activity (GO:0045330);; Biological Process: pectin catabolic process (GO:0045490);;	K01051|2.3e-14|cit:102614801|K01051 pectinesterase [EC:3.1.1.11] | (RefSeq) probable pectinesterase 53	Pentose and glucuronate interconversions (ko00040)	--	--	--	Probable pectinesterase 53 OS=Arabidopsis thaliana OX=3702 GN=PME53 PE=2 SV=1	G	Carbohydrate transport and metabolism	probable pectinesterase 53 [Morus notabilis]
Nn4g24310	[S]	Function unknown	Molecular Function: phospholipid binding (GO:0005543);;	K20043|5.5e-30|egu:105039411|K20043 clathrin coat assembly protein AP180 | (RefSeq) LOW QUALITY PROTEIN: putative clathrin assembly protein At5g57200	--	[TU]	Signal transduction mechanisms;; Intracellular trafficking, secretion, and vesicular transport	Protein of unknown function (DUF1674)	Putative clathrin assembly protein At5g57200 OS=Arabidopsis thaliana OX=3702 GN=At5g57200 PE=3 SV=1	--	--	PREDICTED: putative clathrin assembly protein At5g57200 [Nelumbo nucifera]
Nn2g14068	[I]	Lipid transport and metabolism	Molecular Function: oxidoreductase activity (GO:0016491);; Molecular Function: flavin adenine dinucleotide binding (GO:0050660);;	K08232|2.8e-241|nnu:104586919|K08232 monodehydroascorbate reductase (NADH) [EC:1.6.5.4] | (RefSeq) monodehydroascorbate reductase	Ascorbate and aldarate metabolism (ko00053)	[R]	General function prediction only	Pyridine nucleotide-disulphide oxidoreductase	Monodehydroascorbate reductase OS=Solanum lycopersicum OX=4081 GN=AFRR PE=1 SV=1	C	Energy production and conversion	PREDICTED: monodehydroascorbate reductase [Nelumbo nucifera]
Nn2g14198	--	--	Molecular Function: microtubule motor activity (GO:0003777);; Molecular Function: ATP binding (GO:0005524);; Biological Process: microtubule-based movement (GO:0007018);; Molecular Function: microtubule binding (GO:0008017);;	K10398|0.0e+00|nnu:104607646|K10398 kinesin family member 11 | (RefSeq) kinesin-like protein KIN-5C	--	[Z]	Cytoskeleton	Kinesin motor domain	Kinesin-like protein KIN-5C OS=Nicotiana tabacum OX=4097 GN=KIN5C PE=1 SV=1	Z	Cytoskeleton	PREDICTED: kinesin-like protein KIN-5C [Nelumbo nucifera]
Nn5g30524	--	--	Cellular Component: nucleosome (GO:0000786);; Molecular Function: DNA binding (GO:0003677);; Cellular Component: nucleus (GO:0005634);; Molecular Function: protein heterodimerization activity (GO:0046982);;	K11253|4.2e-09|adu:107460150|K11253 histone H3 | (RefSeq) histone H3.3	--	[B]	Chromatin structure and dynamics	Core histone H2A/H2B/H3/H4	Histone H3 type 1 OS=Chlamydomonas reinhardtii OX=3055 GN=ch3-I PE=1 SV=1	B	Chromatin structure and dynamics	histone H3 [Macleaya cordata]
Nn5g28785	--	--	Molecular Function: magnesium ion binding (GO:0000287);; Molecular Function: terpene synthase activity (GO:0010333);;	K18108|2.9e-175|vvi:100855144|K18108 (-)-alpha-terpineol synthase [EC:4.2.3.111] | (RefSeq) (-)-alpha-terpineol synthase	Monoterpenoid biosynthesis (ko00902)	--	--	Terpene synthase family, metal binding domain	(-)-alpha-terpineol synthase OS=Vitis vinifera OX=29760 PE=1 SV=1	S	Function unknown	PREDICTED: terpene synthase 10-like [Nelumbo nucifera]
Nn2g13379	--	--	Molecular Function: intramolecular transferase activity (GO:0016866);; Biological Process: plant-type cell wall organization or biogenesis (GO:0071669);;	K13379|3.1e-53|nnu:104597894|K13379 reversibly glycosylated polypeptide / UDP-arabinopyranose mutase [EC:2.4.1.- 5.4.99.30] | (RefSeq) UDP-arabinopyranose mutase 3	Amino sugar and nucleotide sugar metabolism (ko00520)	--	--	Reversibly glycosylated polypeptide	Probable UDP-arabinopyranose mutase 2 OS=Solanum tuberosum OX=4113 GN=UPTG2 PE=1 SV=1	S	Function unknown	PREDICTED: UDP-arabinopyranose mutase 3 [Nelumbo nucifera]
Nn3g16588	--	--	--	--	--	--	--	--	--	--	--	PREDICTED: uncharacterized protein LOC104592990 [Nelumbo nucifera]
Nn6g31945	[O]	Posttranslational modification, protein turnover, chaperones	Molecular Function: ATP binding (GO:0005524);; Cellular Component: chaperonin-containing T-complex (GO:0005832);; Biological Process: protein folding (GO:0006457);; Molecular Function: unfolded protein binding (GO:0051082);;	K09494|4.8e-36|ccav:112503298|K09494 T-complex protein 1 subunit beta | (RefSeq) T-complex protein 1 subunit beta	--	[O]	Posttranslational modification, protein turnover, chaperones	TCP-1/cpn60 chaperonin family	T-complex protein 1 subunit beta OS=Arabidopsis thaliana OX=3702 GN=CCT2 PE=1 SV=1	O	Posttranslational modification, protein turnover, chaperones	hypothetical protein E3N88_25415 [Mikania micrantha]
Nn1g07112	--	--	Cellular Component: integral component of membrane (GO:0016021);;	--	--	--	--	Protein of unknown function (DUF1084)	Tobamovirus multiplication protein 1 OS=Nicotiana tabacum OX=4097 GN=TOM1 PE=1 SV=1	S	Function unknown	PREDICTED: tobamovirus multiplication protein 1-like [Nelumbo nucifera]
Nn2g12732	--	--	Molecular Function: transcription factor activity, sequence-specific DNA binding (GO:0003700);;	--	--	--	--	--	--	K	Transcription	PREDICTED: basic leucine zipper 9-like isoform X1 [Nelumbo nucifera]
Nn4g24081	--	--	Cellular Component: integral component of membrane (GO:0016021);;	--	--	--	--	--	--	--	--	PREDICTED: uncharacterized protein LOC104587763 [Nelumbo nucifera]
Nn4g24947	[S]	Function unknown	Cellular Component: integral component of membrane (GO:0016021);; Biological Process: transmembrane transport (GO:0055085);;	K15363|5.1e-64|bna:111210893|K15363 fanconi-associated nuclease 1 [EC:3.1.21.- 3.1.4.1] | (RefSeq) fanconi-associated nuclease 1 homolog	--	--	--	OPT oligopeptide transporter protein	Probable metal-nicotianamine transporter YSL7 OS=Arabidopsis thaliana OX=3702 GN=YSL7 PE=2 SV=1	S	Function unknown	PREDICTED: probable metal-nicotianamine transporter YSL7 [Nelumbo nucifera]
Nn4g23757	--	--	--	K12603|9.6e-32|gmx:100819402|K12603 CCR4-NOT transcription complex subunit 6 [EC:3.1.13.4] | (RefSeq) carbon catabolite repressor protein 4 homolog 1	RNA degradation (ko03018)	[K]	Transcription	Endonuclease/Exonuclease/phosphatase family	Carbon catabolite repressor protein 4 homolog 3 OS=Arabidopsis thaliana OX=3702 GN=CCR4-3 PE=2 SV=2	L	Replication, recombination and repair	PREDICTED: carbon catabolite repressor protein 4 homolog 3 isoform X3 [Nelumbo nucifera]
Nn6g31573	--	--	Molecular Function: transferase activity, transferring glycosyl groups (GO:0016757);;	K23869|2.1e-279|nnu:104606894|K23869 galactan beta-1,4-galactosyltransferase [EC:2.4.1.-] | (RefSeq) galactan beta-1,4-galactosyltransferase GALS1-like	--	[S]	Function unknown	Glycosyltransferase family 92	Galactan beta-1,4-galactosyltransferase GALS1 OS=Arabidopsis thaliana OX=3702 GN=GALS1 PE=2 SV=2	S	Function unknown	PREDICTED: galactan beta-1,4-galactosyltransferase GALS1-like [Nelumbo nucifera]
Nn2g13460	--	--	Molecular Function: AT DNA binding (GO:0003680);; Molecular Function: transcription factor activity, sequence-specific DNA binding (GO:0003700);; Cellular Component: nucleus (GO:0005634);;	--	--	--	--	Plants and Prokaryotes Conserved (PCC) domain	AT-hook motif nuclear-localized protein 15 OS=Arabidopsis thaliana OX=3702 GN=AHL15 PE=2 SV=1	K	Transcription	PREDICTED: AT-hook motif nuclear-localized protein 15-like [Nelumbo nucifera]
Nn1g00965	[C]	Energy production and conversion	Biological Process: carbohydrate metabolic process (GO:0005975);; Biological Process: tricarboxylic acid cycle (GO:0006099);; Biological Process: malate metabolic process (GO:0006108);; Molecular Function: L-malate dehydrogenase activity (GO:0030060);;	K00025|1.4e-202|nnu:104602371|K00025 malate dehydrogenase [EC:1.1.1.37] | (RefSeq) malate dehydrogenase, cytoplasmic-like	Citrate cycle (TCA cycle) (ko00020);; Cysteine and methionine metabolism (ko00270);; Pyruvate metabolism (ko00620);; Glyoxylate and dicarboxylate metabolism (ko00630);; Carbon fixation in photosynthetic organisms (ko00710);; Carbon metabolism (ko01200)	[C]	Energy production and conversion	lactate/malate dehydrogenase, alpha/beta C-terminal domain	Malate dehydrogenase, cytoplasmic OS=Zea mays OX=4577 PE=1 SV=2	C	Energy production and conversion	PREDICTED: malate dehydrogenase, cytoplasmic-like isoform X1 [Nelumbo nucifera]
Nn1g02129	--	--	Cellular Component: integral component of membrane (GO:0016021);;	--	--	--	--	AWPM-19-like family	Membrane protein PM19L OS=Oryza sativa subsp. japonica OX=39947 GN=PM19L PE=2 SV=1	S	Function unknown	PREDICTED: uncharacterized protein LOC104596402 [Nelumbo nucifera]
Nn5g30731	--	--	Cellular Component: integral component of membrane (GO:0016021);;	K15692|9.5e-161|nnu:104590046|K15692 E3 ubiquitin-protein ligase RNF13 [EC:2.3.2.27] | (RefSeq) receptor homology region, transmembrane domain- and RING domain-containing protein 1	--	[O]	Posttranslational modification, protein turnover, chaperones	Ring finger domain	Receptor homology region, transmembrane domain- and RING domain-containing protein 1 OS=Arabidopsis thaliana OX=3702 GN=RMR1 PE=2 SV=1	O	Posttranslational modification, protein turnover, chaperones	PREDICTED: receptor homology region, transmembrane domain- and RING domain-containing protein 1 [Nelumbo nucifera]
Nn4g22677	--	--	--	--	--	--	--	SOUL heme-binding protein	--	S	Function unknown	PREDICTED: heme-binding protein 2-like [Nelumbo nucifera]
Nn139s43920	--	--	--	--	--	--	--	--	--	S	Function unknown	hypothetical protein CQW23_35335 [Capsicum baccatum]
Nn2g13967	--	--	Molecular Function: metal ion binding (GO:0046872);;	K22768|6.0e-08|ppp:112282188|K22768 methyl-CpG-binding domain-containing protein 9 [EC:2.3.1.48] | (RefSeq) uncharacterized protein LOC112282188 isoform X1	--	[BK]	Chromatin structure and dynamics;; Transcription	PHD-finger	DDT domain-containing protein PTM OS=Arabidopsis thaliana OX=3702 GN=PTM PE=1 SV=1	--	--	PREDICTED: DDT domain-containing protein PTM-like [Nelumbo nucifera]
Nn5g28403	--	--	Molecular Function: protein serine/threonine kinase activity (GO:0004674);; Molecular Function: calcium ion binding (GO:0005509);; Cellular Component: integral component of membrane (GO:0016021);; Molecular Function: polysaccharide binding (GO:0030247);;	--	--	--	--	--	--	T	Signal transduction mechanisms	PREDICTED: wall-associated receptor kinase 2-like [Nelumbo nucifera]
Nn5g27454	--	--	Cellular Component: integral component of membrane (GO:0016021);;	K23877|3.6e-73|pxb:103939645|K23877 xyloglucan O-acetyltransferase | (RefSeq) protein ALTERED XYLOGLUCAN 4-like	--	--	--	GDSL/SGNH-like Acyl-Esterase family found in Pmr5 and Cas1p	Protein trichome birefringence-like 18 OS=Arabidopsis thaliana OX=3702 GN=TBL18 PE=2 SV=1	S	Function unknown	PREDICTED: protein YLS7-like isoform X1 [Nelumbo nucifera]
Nn5g28185	[QV]	Secondary metabolites biosynthesis, transport and catabolism;; Defense mechanisms	Molecular Function: monooxygenase activity (GO:0004497);; Molecular Function: iron ion binding (GO:0005506);; Cellular Component: integral component of membrane (GO:0016021);; Molecular Function: oxidoreductase activity, acting on paired donors, with incorporation or reduction of molecular oxygen (GO:0016705);; Molecular Function: heme binding (GO:0020037);;	K20617|1.3e-147|pda:103697394|K20617 cytochrome P450 family 71 subfamily A | (RefSeq) cytochrome P450 71A1-like	--	[Q]	Secondary metabolites biosynthesis, transport and catabolism	Cytochrome P450	Cytochrome P450 71AP13 OS=Prunus mume OX=102107 GN=CYP71AP13 PE=2 SV=1	Q	Secondary metabolites biosynthesis, transport and catabolism	PREDICTED: cytochrome P450 71A1-like [Nelumbo nucifera]
Nn4g24366	--	--	Molecular Function: protein binding (GO:0005515);;	--	--	--	--	F-box domain	--	S	Function unknown	PREDICTED: F-box protein At4g12382-like [Nelumbo nucifera]
Nn6g35239	--	--	Cellular Component: chromosome, centromeric region (GO:0000775);; Cellular Component: nucleus (GO:0005634);; Biological Process: meiotic chromosome segregation (GO:0045132);;	--	--	--	--	Shugoshin C terminus	SHUGOSHIN 2 OS=Arabidopsis thaliana OX=3702 GN=SGO2 PE=2 SV=1	S	Function unknown	PREDICTED: shugoshin-1-like isoform X2 [Nelumbo nucifera]
Nn3g19414	--	--	Biological Process: carbohydrate metabolic process (GO:0005975);; Molecular Function: intramolecular transferase activity, phosphotransferases (GO:0016868);;	K01836|7.2e-153|nnu:104610445|K01836 phosphoacetylglucosamine mutase [EC:5.4.2.3] | (RefSeq) phosphoacetylglucosamine mutase	Amino sugar and nucleotide sugar metabolism (ko00520)	[G]	Carbohydrate transport and metabolism	Phosphoglucomutase/phosphomannomutase, alpha/beta/alpha domain I	Phosphoacetylglucosamine mutase OS=Arabidopsis thaliana OX=3702 GN=DRT101 PE=1 SV=1	G	Carbohydrate transport and metabolism	PREDICTED: phosphoacetylglucosamine mutase [Nelumbo nucifera]
Nn272s46024	--	--	--	--	--	--	--	--	--	--	--	hypothetical protein CQW23_34295 [Capsicum baccatum]
Nn5g29978	--	--	Molecular Function: protein dimerization activity (GO:0046983);;	K20558|4.0e-30|hbr:110645927|K20558 transcription factor SPEECHLESS | (RefSeq) transcription factor SPEECHLESS-like	MAPK signaling pathway - plant (ko04016)	--	--	Helix-loop-helix DNA-binding domain	Transcription factor bHLH94 OS=Arabidopsis thaliana OX=3702 GN=BHLH94 PE=1 SV=2	K	Transcription	PREDICTED: transcription factor bHLH94-like [Nelumbo nucifera]
Nn8g39606	--	--	Cellular Component: integral component of membrane (GO:0016021);; Molecular Function: kinase activity (GO:0016301);;	K17550|1.2e-25|qsu:111989606|K17550 protein phosphatase 1 regulatory subunit 7 | (RefSeq) probable LRR receptor-like serine/threonine-protein kinase At2g24230	--	[R]	General function prediction only	Leucine rich repeat	Receptor-like protein 13 OS=Arabidopsis thaliana OX=3702 GN=RLP13 PE=3 SV=1	A	RNA processing and modification	PREDICTED: LRR receptor-like serine/threonine-protein kinase GSO2 [Nelumbo nucifera]
Nn4g25521	[R]	General function prediction only	--	--	--	--	--	Serine hydrolase (FSH1)	Rhodanese-like domain-containing protein 6 OS=Arabidopsis thaliana OX=3702 GN=STR6 PE=2 SV=1	E	Amino acid transport and metabolism	PREDICTED: rhodanese-like domain-containing protein 6 [Nelumbo nucifera]
Nn8g39989	[Q]	Secondary metabolites biosynthesis, transport and catabolism	Biological Process: cellular aromatic compound metabolic process (GO:0006725);; Molecular Function: ferrous iron binding (GO:0008198);; Molecular Function: zinc ion binding (GO:0008270);; Molecular Function: oxidoreductase activity, acting on single donors with incorporation of molecular oxygen (GO:0016701);; Molecular Function: dioxygenase activity (GO:0051213);;	K15777|2.1e-174|nnu:104609146|K15777 4,5-DOPA dioxygenase extradiol [EC:1.13.11.-] | (RefSeq) extradiol ring-cleavage dioxygenase-like	Betalain biosynthesis (ko00965)	--	--	Catalytic LigB subunit of aromatic ring-opening dioxygenase	Extradiol ring-cleavage dioxygenase OS=Arabidopsis thaliana OX=3702 GN=LIGB PE=2 SV=1	S	Function unknown	PREDICTED: extradiol ring-cleavage dioxygenase-like [Nelumbo nucifera]
Nn4g22796	--	--	--	K07466|1.3e-35|atr:18434835|K07466 replication factor A1 | (RefSeq) uncharacterized protein At4g28440	DNA replication (ko03030);; Nucleotide excision repair (ko03420);; Mismatch repair (ko03430);; Homologous recombination (ko03440)	--	--	--	Uncharacterized protein At4g28440 OS=Arabidopsis thaliana OX=3702 GN=At4g28440 PE=1 SV=1	S	Function unknown	uncharacterized protein At4g28440-like [Vitis riparia]
Nn5g29999	[L]	Replication, recombination and repair	Molecular Function: DNA binding (GO:0003677);; Molecular Function: helicase activity (GO:0004386);; Molecular Function: ATP binding (GO:0005524);; Biological Process: DNA replication initiation (GO:0006270);;	K10738|1.9e-259|nnu:104604326|K10738 DNA helicase MCM9 [EC:3.6.4.12] | (RefSeq) probable DNA helicase MCM9	--	[L]	Replication, recombination and repair	MCM P-loop domain	Probable DNA helicase MCM9 OS=Arabidopsis thaliana OX=3702 GN=MCM9 PE=3 SV=1	L	Replication, recombination and repair	PREDICTED: probable DNA helicase MCM9 [Nelumbo nucifera]
Nn5g31066	--	--	Cellular Component: nucleus (GO:0005634);; Biological Process: regulation of transcription, DNA-templated (GO:0006355);; Molecular Function: zinc ion binding (GO:0008270);;	K17604|4.3e-118|pmum:103344202|K17604 zinc finger SWIM domain-containing protein 3 | (RefSeq) protein FAR1-RELATED SEQUENCE 5-like	--	--	--	FAR1 DNA-binding domain	Protein FAR1-RELATED SEQUENCE 5 OS=Arabidopsis thaliana OX=3702 GN=FRS5 PE=1 SV=1	S	Function unknown	PREDICTED: protein FAR1-RELATED SEQUENCE 5-like [Nelumbo nucifera]
Nn2g11500	--	--	Cellular Component: nucleus (GO:0005634);; Biological Process: DNA replication (GO:0006260);;	K10734|1.2e-103|nnu:104595036|K10734 GINS complex subunit 3 | (RefSeq) DNA replication complex GINS protein PSF3-like	--	[S]	Function unknown	GINS complex protein	--	S	Function unknown	PREDICTED: DNA replication complex GINS protein PSF3-like [Nelumbo nucifera]
Nn1g09534	[R]	General function prediction only	Biological Process: signal transduction (GO:0007165);; Molecular Function: ADP binding (GO:0043531);;	K00695|1.1e-126|mtr:MTR_6g478030|K00695 sucrose synthase [EC:2.4.1.13] | (RefSeq) sucrose synthase	Starch and sucrose metabolism (ko00500)	--	--	TIR domain	TMV resistance protein N OS=Nicotiana glutinosa OX=35889 GN=N PE=1 SV=1	S	Function unknown	PREDICTED: TMV resistance protein N-like isoform X1 [Nelumbo nucifera]
Nn3g16519	--	--	Molecular Function: double-stranded DNA binding (GO:0003690);; Biological Process: regulation of transcription, DNA-templated (GO:0006355);;	K15032|1.5e-158|nnu:104592930|K15032 mTERF domain-containing protein, mitochondrial | (RefSeq) transcription termination factor MTERF15, mitochondrial-like	--	[KR]	Transcription;; General function prediction only	mTERF	--	K	Transcription	PREDICTED: transcription termination factor MTERF15, mitochondrial-like [Nelumbo nucifera]
Nn2g14017	--	--	--	K01051|1.1e-12|var:108341535|K01051 pectinesterase [EC:3.1.1.11] | (RefSeq) probable pectinesterase/pectinesterase inhibitor 58	Pentose and glucuronate interconversions (ko00040)	[K]	Transcription	Myb/SANT-like DNA-binding domain	Trihelix transcription factor PTL OS=Arabidopsis thaliana OX=3702 GN=PTL PE=1 SV=1	K	Transcription	PREDICTED: trihelix transcription factor PTL-like [Nelumbo nucifera]
Nn1g06281	--	--	Molecular Function: ubiquitin-protein transferase activity (GO:0004842);;	K10260|3.8e-14|csl:COCSUDRAFT_23114|K10260 F-box and WD-40 domain protein 7 | (RefSeq) WD40 repeat-like protein	Ubiquitin mediated proteolysis (ko04120)	--	--	U-box domain	U-box domain-containing protein 26 OS=Arabidopsis thaliana OX=3702 GN=PUB26 PE=2 SV=1	H	Coenzyme transport and metabolism	PREDICTED: U-box domain-containing protein 26-like [Nelumbo nucifera]
Nn2g14408	--	--	Molecular Function: transcription factor activity, sequence-specific DNA binding (GO:0003700);; Cellular Component: nucleus (GO:0005634);;	K14514|2.3e-35|nnu:104590589|K14514 ethylene-insensitive protein 3 | (RefSeq) protein ETHYLENE INSENSITIVE 3-like	MAPK signaling pathway - plant (ko04016);; Plant hormone signal transduction (ko04075)	--	--	--	Protein ETHYLENE-INSENSITIVE 3-like 2 OS=Oryza sativa subsp. japonica OX=39947 GN=EIL2 PE=2 SV=2	S	Function unknown	PREDICTED: protein ETHYLENE INSENSITIVE 3-like [Nelumbo nucifera]
Nn7g36941	--	--	--	K16280|5.8e-13|nnu:104590299|K16280 E3 ubiquitin-protein ligase RGLG [EC:2.3.2.27] | (RefSeq) E3 ubiquitin-protein ligase RGLG1-like	--	--	--	--	--	O	Posttranslational modification, protein turnover, chaperones	PREDICTED: E3 ubiquitin-protein ligase RGLG1-like [Nelumbo nucifera]
Nn3g17527	[OT]	Posttranslational modification, protein turnover, chaperones;; Signal transduction mechanisms	Molecular Function: molecular_function (GO:0003674);; Molecular Function: binding (GO:0005488);; Cellular Component: cellular_component (GO:0005575);; Cellular Component: cell-cell junction (GO:0005911);; Biological Process: regulation of transcription, DNA-templated (GO:0006355);; Biological Process: cellular protein modification process (GO:0006464);; Biological Process: nitrogen compound metab…	--	--	--	--	ACT domain	ACT domain-containing protein ACR4 OS=Arabidopsis thaliana OX=3702 GN=ACR4 PE=2 SV=1	S	Function unknown	PREDICTED: ACT domain-containing protein ACR4-like [Nelumbo nucifera]
Nn5g27034	--	--	--	--	--	--	--	--	--	--	--	rRNA intron-encoded homing endonuclease [Gossypium australe]
Nn230s45536	--	--	--	--	--	--	--	--	--	--	--	rRNA intron-encoded homing endonuclease [Gossypium australe]
Nn194s44795	--	--	--	--	--	--	--	--	--	--	--	rRNA intron-encoded homing endonuclease [Gossypium australe]
Nn4g26499	--	--	Molecular Function: sucrose alpha-glucosidase activity (GO:0004575);; Biological Process: sucrose catabolic process (GO:0005987);; Molecular Function: glycopeptide alpha-N-acetylgalactosaminidase activity (GO:0033926);;	--	--	--	--	--	Alkaline/neutral invertase CINV1 OS=Arabidopsis thaliana OX=3702 GN=CINV1 PE=1 SV=1	S	Function unknown	PREDICTED: probable alkaline/neutral invertase D [Nelumbo nucifera]
Nn1g02693	--	--	--	--	--	--	--	--	--	--	--	PREDICTED: uncharacterized protein LOC104610066 [Nelumbo nucifera]
Nn8g38954	--	--	Biological Process: snRNA export from nucleus (GO:0006408);;	K14291|3.8e-134|nnu:104588206|K14291 phosphorylated adapter RNA export protein | (RefSeq) uncharacterized LOC104588206	RNA transport (ko03013)	[A]	RNA processing and modification	PHAX RNA-binding domain	--	A	RNA processing and modification	PREDICTED: uncharacterized protein LOC104588206 [Nelumbo nucifera]
Nn5g29377	--	--	--	K03100|2.3e-107|tcc:18591278|K03100 signal peptidase I [EC:3.4.21.89] | (RefSeq) probable thylakoidal processing peptidase 2, chloroplastic	Protein export (ko03060)	--	--	--	--	--	--	PREDICTED: uncharacterized protein LOC104595864 [Nelumbo nucifera]
Nn207s45075	--	--	--	--	--	--	--	--	--	--	--	hypothetical protein CSA_004614 [Cucumis sativus]
Nn7g36310	--	--	Biological Process: reproduction (GO:0000003);; Biological Process: developmental process involved in reproduction (GO:0003006);; Molecular Function: molecular_function (GO:0003674);; Molecular Function: nucleic acid binding (GO:0003676);; Molecular Function: RNA binding (GO:0003723);; Molecular Function: structural constituent of ribosome (GO:0003735);; Molecular Function: catalytic activity (GO…	--	--	[R]	General function prediction only	PPR repeat family	Pentatricopeptide repeat-containing protein At2g41720 OS=Arabidopsis thaliana OX=3702 GN=EMB2654 PE=2 SV=1	S	Function unknown	PREDICTED: pentatricopeptide repeat-containing protein At2g41720 isoform X1 [Nelumbo nucifera]
Nn5g29037	[I]	Lipid transport and metabolism	Molecular Function: inositol-3-phosphate synthase activity (GO:0004512);; Biological Process: inositol biosynthetic process (GO:0006021);; Biological Process: phospholipid biosynthetic process (GO:0008654);;	K01858|1.4e-293|nnu:104600092|K01858 myo-inositol-1-phosphate synthase [EC:5.5.1.4] | (RefSeq) inositol-3-phosphate synthase	Inositol phosphate metabolism (ko00562)	[I]	Lipid transport and metabolism	Myo-inositol-1-phosphate synthase	Inositol-3-phosphate synthase OS=Sesamum indicum OX=4182 PE=2 SV=1	I	Lipid transport and metabolism	PREDICTED: inositol-3-phosphate synthase [Nelumbo nucifera]
Nn152s44189	--	--	--	--	--	--	--	--	--	S	Function unknown	hypothetical protein GOBAR_AA32096 [Gossypium barbadense]
Nn2g12694	--	--	Molecular Function: molecular_function (GO:0003674);; Molecular Function: nucleic acid binding (GO:0003676);; Molecular Function: RNA binding (GO:0003723);; Molecular Function: catalytic activity (GO:0003824);; Molecular Function: nuclease activity (GO:0004518);; Molecular Function: endonuclease activity (GO:0004519);; Molecular Function: binding (GO:0005488);; Cellular Component: cellular_compon…	--	--	[R]	General function prediction only	PPR repeat family	Putative pentatricopeptide repeat-containing protein At1g02420 OS=Arabidopsis thaliana OX=3702 GN=At1g02420 PE=3 SV=2	S	Function unknown	PREDICTED: putative pentatricopeptide repeat-containing protein At1g02420 [Nelumbo nucifera]
Nn5g28440	[L]	Replication, recombination and repair	Molecular Function: DNA binding (GO:0003677);; Molecular Function: DNA topoisomerase type I activity (GO:0003917);; Cellular Component: chromosome (GO:0005694);; Biological Process: DNA topological change (GO:0006265);; Molecular Function: zinc ion binding (GO:0008270);;	K03165|0.0e+00|nnu:104606675|K03165 DNA topoisomerase III [EC:5.6.2.1] | (RefSeq) DNA topoisomerase 3-alpha	Homologous recombination (ko03440)	[L]	Replication, recombination and repair	DNA topoisomerase	DNA topoisomerase 3-alpha OS=Oryza sativa subsp. japonica OX=39947 GN=TOP3A PE=3 SV=1	L	Replication, recombination and repair	PREDICTED: DNA topoisomerase 3-alpha [Nelumbo nucifera]
Nn7g36224	--	--	--	K22262|1.8e-105|qsu:112034235|K22262 WD repeat and FYVE domain-containing protein 3 | (RefSeq) protein SPIRRIG	--	[R]	General function prediction only	PPR repeat family	Pentatricopeptide repeat-containing protein At2g33680 OS=Arabidopsis thaliana OX=3702 GN=PCMP-E19 PE=3 SV=1	S	Function unknown	PREDICTED: pentatricopeptide repeat-containing protein At2g33680-like [Nelumbo nucifera]
Nn059s42020	--	--	--	--	--	--	--	--	--	--	--	hypothetical protein LR48_Vigan05g084500 [Vigna angularis]
Nn031s41599	--	--	Molecular Function: ATP binding (GO:0005524);; Cellular Component: chloroplast (GO:0009507);;	--	--	--	--	--	--	--	--	hypothetical protein B456_005G082000 [Gossypium raimondii]
Nn8g39948	[IR]	Lipid transport and metabolism;; General function prediction only	Biological Process: lipid metabolic process (GO:0006629);; Cellular Component: integral component of membrane (GO:0016021);; Molecular Function: lipase activity (GO:0016298);;	K00679|4.7e-35|cic:CICLE_v10027727mg|K00679 phospholipid:diacylglycerol acyltransferase [EC:2.3.1.158] | (RefSeq) hypothetical protein	Glycerolipid metabolism (ko00561)	--	--	GDSL-like Lipase/Acylhydrolase	GDSL esterase/lipase 5 OS=Arabidopsis thaliana OX=3702 GN=GLIP5 PE=2 SV=2	I	Lipid transport and metabolism	PREDICTED: GDSL esterase/lipase 5-like [Nelumbo nucifera]
Nn4g26185	--	--	--	K16302|3.1e-94|rcu:8266776|K16302 metal transporter CNNM | (RefSeq) uncharacterized protein LOC8266776	--	--	--	--	--	--	--	PREDICTED: uncharacterized protein LOC104612678 isoform X3 [Nelumbo nucifera]
Nn7g37946	--	--	Molecular Function: protein binding (GO:0005515);;	K00924|2.1e-10|mcha:111011885|K00924 kinase [EC:2.7.1.-] | (RefSeq) receptor protein kinase TMK1	--	--	--	Leucine rich repeat	Polygalacturonase inhibitor OS=Pyrus communis OX=23211 GN=PGIP PE=1 SV=1	--	--	PREDICTED: polygalacturonase inhibitor 2-like [Nelumbo nucifera]
Nn3g19675	--	--	Cellular Component: cellular_component (GO:0005575);; Cellular Component: intracellular (GO:0005622);; Cellular Component: cell (GO:0005623);; Cellular Component: nucleus (GO:0005634);; Biological Process: nucleobase-containing compound metabolic process (GO:0006139);; Biological Process: transcription, DNA-templated (GO:0006351);; Biological Process: cellular aromatic compound metabolic process …	K13413|5.0e-51|sbi:110435403|K13413 mitogen-activated protein kinase kinase 4/5 [EC:2.7.12.2] | (RefSeq) mitogen-activated protein kinase kinase 5-like	MAPK signaling pathway - plant (ko04016);; Plant hormone signal transduction (ko04075);; Plant-pathogen interaction (ko04626)	--	--	Protein of unknown function (DUF640)	Protein LIGHT-DEPENDENT SHORT HYPOCOTYLS 4 OS=Arabidopsis thaliana OX=3702 GN=LSH4 PE=1 SV=1	S	Function unknown	PREDICTED: protein LIGHT-DEPENDENT SHORT HYPOCOTYLS 3-like isoform X2 [Nelumbo nucifera]
Nn5g28160	--	--	Cellular Component: integral component of membrane (GO:0016021);;	K10249|3.8e-19|bpg:Bathy14g02650|K10249 elongation of very long chain fatty acids protein 4 [EC:2.3.1.199] | (RefSeq) hypothetical protein	Fatty acid elongation (ko00062);; Biosynthesis of unsaturated fatty acids (ko01040);; Fatty acid metabolism (ko01212)	[I]	Lipid transport and metabolism	GNS1/SUR4 family	Elongation of fatty acids protein 3-like OS=Arabidopsis thaliana OX=3702 GN=HOS3 PE=2 SV=1	I	Lipid transport and metabolism	PREDICTED: elongation of fatty acids protein 3-like [Nelumbo nucifera]
Nn6g31512	[O]	Posttranslational modification, protein turnover, chaperones	--	K09503|1.3e-14|qsu:112019417|K09503 DnaJ homolog subfamily A member 2 | (RefSeq) mitochondrial protein import protein mas5-like	Protein processing in endoplasmic reticulum (ko04141)	[O]	Posttranslational modification, protein turnover, chaperones	X-domain of DnaJ-containing	Chaperone protein dnaJ 10 OS=Arabidopsis thaliana OX=3702 GN=ATJ10 PE=2 SV=2	O	Posttranslational modification, protein turnover, chaperones	PREDICTED: chaperone protein dnaJ 10-like [Nelumbo nucifera]
Nn4g24412	[P]	Inorganic ion transport and metabolism	Molecular Function: potassium ion transmembrane transporter activity (GO:0015079);; Cellular Component: integral component of membrane (GO:0016021);;	K03549|1.1e-63|zju:107419568|K03549 KUP system potassium uptake protein | (RefSeq) potassium transporter 25-like isoform X1	--	--	--	K+ potassium transporter	Potassium transporter 2 OS=Arabidopsis thaliana OX=3702 GN=POT2 PE=1 SV=2	P	Inorganic ion transport and metabolism	potassium transporter 25-like isoform X1 [Ziziphus jujuba]
Nn8g39941	[O]	Posttranslational modification, protein turnover, chaperones	Molecular Function: metalloendopeptidase activity (GO:0004222);; Molecular Function: zinc ion binding (GO:0008270);; Cellular Component: extracellular matrix (GO:0031012);;	K07761|1.6e-69|han:110896101|K07761 metalloendoproteinase 5-MMP [EC:3.4.24.-] | (RefSeq) metalloendoproteinase 5-MMP-like	--	[OW]	Posttranslational modification, protein turnover, chaperones;; Extracellular structures	Matrixin	Metalloendoproteinase 2-MMP OS=Arabidopsis thaliana OX=3702 GN=2MMP PE=1 SV=1	O	Posttranslational modification, protein turnover, chaperones	PREDICTED: metalloendoproteinase 2-MMP-like [Nelumbo nucifera]
Nn6g34121	--	--	--	--	--	--	--	--	--	--	--	hypothetical protein glysoja_001798, partial [Glycine soja]
Nn5g28140	--	--	--	K14709|4.6e-30|gra:105775689|K14709 solute carrier family 39 (zinc transporter), member 1/2/3 | (RefSeq) uncharacterized LOC105775689	--	--	--	XH domain	Protein INVOLVED IN DE NOVO 2 OS=Arabidopsis thaliana OX=3702 GN=IDN2 PE=1 SV=1	S	Function unknown	PREDICTED: factor of DNA methylation 4-like [Nelumbo nucifera]
Nn1g02279	[O]	Posttranslational modification, protein turnover, chaperones	Molecular Function: ATP binding (GO:0005524);;	K09489|0.0e+00|nnu:104596515|K09489 heat shock 70kDa protein 4 | (RefSeq) heat shock 70 kDa protein 8	--	[O]	Posttranslational modification, protein turnover, chaperones	Hsp70 protein	Heat shock 70 kDa protein 8 OS=Arabidopsis thaliana OX=3702 GN=HSP70-8 PE=1 SV=1	O	Posttranslational modification, protein turnover, chaperones	PREDICTED: heat shock 70 kDa protein 8 [Nelumbo nucifera]
Nn6g32578	--	--	--	--	--	--	--	--	--	--	--	unnamed protein product [Prunus armeniaca]
Nn3g16703	[R]	General function prediction only	Biological Process: defense response (GO:0006952);; Molecular Function: ADP binding (GO:0043531);;	K15078|1.5e-111|tcc:18614561|K15078 structure-specific endonuclease subunit SLX1 [EC:3.6.1.-] | (RefSeq) putative disease resistance protein RGA3	--	[T]	Signal transduction mechanisms	NB-ARC domain	Disease resistance protein RGA2 OS=Solanum bulbocastanum OX=147425 GN=RGA2 PE=1 SV=1	T	Signal transduction mechanisms	PREDICTED: disease resistance protein RGA2-like [Nelumbo nucifera]
Nelumbo_nucifera_newGene_2814	--	--	--	--	--	--	--	--	--	--	--	PREDICTED: uncharacterized protein LOC104589400 [Nelumbo nucifera]
Nn4g23025	[DZ]	Cell cycle control, cell division, chromosome partitioning;; Cytoskeleton	--	K10614|2.1e-24|cvr:CHLNCDRAFT_57991|K10614 E3 ubiquitin-protein ligase HERC3 [EC:2.3.2.26] | (RefSeq) hypothetical protein	Ubiquitin mediated proteolysis (ko04120)	[S]	Function unknown	Regulator of chromosome condensation (RCC1) repeat	Ultraviolet-B receptor UVR8 OS=Arabidopsis thaliana OX=3702 GN=UVR8 PE=1 SV=1	--	--	PREDICTED: ultraviolet-B receptor UVR8 isoform X3 [Nelumbo nucifera]
Nn5g29665	--	--	Biological Process: regulation of photomorphogenesis (GO:0010099);;	--	--	--	--	--	--	S	Function unknown	PREDICTED: uncharacterized protein LOC104595647 isoform X1 [Nelumbo nucifera]
Nn4g23221	--	--	Biological Process: signal transduction (GO:0007165);;	K20642|1.2e-06|lja:Lj3g3v2993420.1|K20642 Rho GTPase-activating protein 22/24/25 | (RefSeq) Lj3g3v2993420.1; -	--	--	--	--	--	T	Signal transduction mechanisms	PREDICTED: rho GTPase-activating protein 5 isoform X1 [Nelumbo nucifera]
Nn1g00530	--	--	Molecular Function: polysaccharide binding (GO:0030247);;	--	--	--	--	Wall-associated receptor kinase galacturonan-binding	--	S	Function unknown	PREDICTED: uncharacterized protein LOC104610365 [Nelumbo nucifera]
Nn1g04542	--	--	--	--	--	--	--	--	--	--	--	PREDICTED: TATA element modulatory factor isoform X1 [Nelumbo nucifera]
Nn3g17866	--	--	Cellular Component: integral component of membrane (GO:0016021);;	--	--	--	--	--	--	--	--	PREDICTED: uncharacterized protein LOC104602168 [Nelumbo nucifera]
Nn098s43098	--	--	--	--	--	--	--	--	--	S	Function unknown	hypothetical protein CQW23_35335 [Capsicum baccatum]
Nn6g32955	--	--	--	--	--	--	--	--	--	--	--	hypothetical protein CSA_004614 [Cucumis sativus]
Nn1g04706	[R]	General function prediction only	Molecular Function: protein kinase activity (GO:0004672);; Molecular Function: ATP binding (GO:0005524);; Cellular Component: integral component of membrane (GO:0016021);;	K13418|9.9e-35|ppp:112278174|K13418 somatic embryogenesis receptor kinase 1 [EC:2.7.10.1 2.7.11.1] | (RefSeq) LRR receptor kinase BAK1-like	--	--	--	Protein kinase domain	Probable LRR receptor-like serine/threonine-protein kinase At4g37250 OS=Arabidopsis thaliana OX=3702 GN=At4g37250 PE=1 SV=1	T	Signal transduction mechanisms	PREDICTED: probable LRR receptor-like serine/threonine-protein kinase At4g37250 [Nelumbo nucifera]
Nn6g32132	[E]	Amino acid transport and metabolism	Molecular Function: catalytic activity (GO:0003824);;	K15631|1.7e-12|ppp:112282503|K15631 molybdenum cofactor sulfurtransferase [EC:2.8.1.9] | (RefSeq) molybdenum cofactor sulfurase-like	Folate biosynthesis (ko00790)	[H]	Coenzyme transport and metabolism	--	Molybdenum cofactor sulfurase OS=Solanum lycopersicum OX=4081 GN=FLACCA PE=2 SV=1	H	Coenzyme transport and metabolism	PREDICTED: uncharacterized protein LOC104601966 [Nelumbo nucifera]
Nn3g20685	--	--	Molecular Function: DNA binding (GO:0003677);; Cellular Component: nucleus (GO:0005634);;	--	--	--	--	HMG-box domain	High mobility group B protein 14 OS=Arabidopsis thaliana OX=3702 GN=HMGB14 PE=2 SV=2	K	Transcription	PREDICTED: high mobility group B protein 14-like [Nelumbo nucifera]
Nn3g17764	[G]	Carbohydrate transport and metabolism	--	--	--	--	--	Beta-lactamase superfamily domain	--	S	Function unknown	PREDICTED: uncharacterized protein LOC104601444 [Nelumbo nucifera]
Nn152s44205	--	--	--	--	--	--	--	--	--	S	Function unknown	hypothetical protein CQW23_35335 [Capsicum baccatum]
Nn154s44275	--	--	--	--	--	--	--	--	--	--	--	hypothetical protein CMV_005638 [Castanea mollissima]
Nn1g04397	--	--	--	K01759|3.6e-27|aip:107644408|K01759 lactoylglutathione lyase [EC:4.4.1.5] | (RefSeq) probable lactoylglutathione lyase, chloroplastic	Pyruvate metabolism (ko00620)	--	--	--	--	S	Function unknown	PREDICTED: uncharacterized protein LOC104593437 [Nelumbo nucifera]
Nn3g18540	--	--	Molecular Function: nucleic acid binding (GO:0003676);;	K03695|1.5e-17|smo:SELMODRAFT_411118|K03695 ATP-dependent Clp protease ATP-binding subunit ClpB | (RefSeq) hypothetical protein	--	[R]	General function prediction only	G-patch domain	--	S	Function unknown	PREDICTED: G patch domain and ankyrin repeat-containing protein 1 homolog [Nelumbo nucifera]
Nn2g14221	--	--	Molecular Function: DNA binding (GO:0003677);; Cellular Component: nucleus (GO:0005634);; Biological Process: regulation of transcription, DNA-templated (GO:0006355);;	K00521|4.8e-08|cmos:111447866|K00521 ferric-chelate reductase [EC:1.16.1.7] | (RefSeq) ferric reduction oxidase 7, chloroplastic-like	--	--	--	No apical meristem (NAM) protein	NAC domain-containing protein 71 OS=Arabidopsis thaliana OX=3702 GN=NAC071 PE=2 SV=1	K	Transcription	PREDICTED: NAC domain-containing protein 90-like [Nelumbo nucifera]
Nn078s42621	--	--	--	--	--	--	--	--	--	--	--	hypothetical protein D0Y65_055488 [Glycine soja]
Nn4g23602	[G]	Carbohydrate transport and metabolism	Molecular Function: phosphogluconate dehydrogenase (decarboxylating) activity (GO:0004616);; Biological Process: pentose-phosphate shunt (GO:0006098);; Biological Process: D-gluconate metabolic process (GO:0019521);; Molecular Function: NADP binding (GO:0050661);;	K00033|2.9e-279|nnu:104597825|K00033 6-phosphogluconate dehydrogenase [EC:1.1.1.44 1.1.1.343] | (RefSeq) 6-phosphogluconate dehydrogenase, decarboxylating 3	Pentose phosphate pathway (ko00030);; Glutathione metabolism (ko00480);; Carbon metabolism (ko01200)	[G]	Carbohydrate transport and metabolism	6-phosphogluconate dehydrogenase, C-terminal domain	6-phosphogluconate dehydrogenase, decarboxylating 2 OS=Arabidopsis thaliana OX=3702 GN=PGD2 PE=1 SV=1	G	Carbohydrate transport and metabolism	PREDICTED: 6-phosphogluconate dehydrogenase, decarboxylating 3 [Nelumbo nucifera]
Nn1g05265	--	--	Biological Process: metal ion transport (GO:0030001);; Molecular Function: metal ion binding (GO:0046872);;	K18081|1.3e-09|smo:SELMODRAFT_437478|K18081 myotubularin-related protein 1/2 [EC:3.1.3.64 3.1.3.95] | (RefSeq) hypothetical protein	Inositol phosphate metabolism (ko00562);; Phosphatidylinositol signaling system (ko04070)	[P]	Inorganic ion transport and metabolism	Heavy-metal-associated domain	Heavy metal-associated isoprenylated plant protein 44 OS=Arabidopsis thaliana OX=3702 GN=HIPP44 PE=2 SV=1	P	Inorganic ion transport and metabolism	PREDICTED: heavy metal-associated isoprenylated plant protein 21-like [Nelumbo nucifera]
Nn6g35736	--	--	Cellular Component: integral component of membrane (GO:0016021);;	--	--	--	--	Cotton fibre expressed protein	--	S	Function unknown	PREDICTED: uncharacterized protein LOC104605671 [Nelumbo nucifera]
Nn4g22477	--	--	Cellular Component: integral component of membrane (GO:0016021);;	K12386|4.6e-35|nnu:104591594|K12386 cystinosin | (RefSeq) cystinosin homolog	--	[E]	Amino acid transport and metabolism	PQ loop repeat	Cystinosin homolog OS=Arabidopsis thaliana OX=3702 GN=At5g40670 PE=2 SV=1	E	Amino acid transport and metabolism	PREDICTED: cystinosin homolog isoform X5 [Nelumbo nucifera]
Nn148s44109	--	--	--	--	--	--	--	--	--	--	--	unnamed protein product [Prunus armeniaca]
Nn1g06936	--	--	--	--	--	--	--	--	--	T	Signal transduction mechanisms	PREDICTED: U-box domain-containing protein 33-like [Nelumbo nucifera]
Nn125s43582	--	--	--	--	--	--	--	--	--	--	--	hypothetical protein CSA_004614 [Cucumis sativus]
Nn6g31554	[H]	Coenzyme transport and metabolism	Molecular Function: uroporphyrinogen-III synthase activity (GO:0004852);; Biological Process: tetrapyrrole biosynthetic process (GO:0033014);;	--	--	--	--	Uroporphyrinogen-III synthase HemD	--	H	Coenzyme transport and metabolism	hypothetical protein TEA_026574 [Camellia sinensis var. sinensis]
Nn2g11100	--	--	Biological Process: lipid metabolic process (GO:0006629);;	K12382|1.9e-107|nnu:104597199|K12382 saposin | (RefSeq) prosaposin	Sphingolipid metabolism (ko00600)	[IG]	Lipid transport and metabolism;; Carbohydrate transport and metabolism	Saposin-like type B, region 1	--	--	--	PREDICTED: prosaposin [Nelumbo nucifera]
Nn3g17623	--	--	Cellular Component: integral component of membrane (GO:0016021);;	K00993|6.7e-49|bna:106453259|K00993 ethanolaminephosphotransferase [EC:2.7.8.1] | (RefSeq) uncharacterized protein LOC106453259	Phosphonate and phosphinate metabolism (ko00440);; Glycerophospholipid metabolism (ko00564);; Ether lipid metabolism (ko00565)	--	--	Protein of unknown function (DUF1262)	--	S	Function unknown	PREDICTED: uncharacterized protein LOC104600638 [Nelumbo nucifera]
Nn3g20029	[IQ]	Lipid transport and metabolism;; Secondary metabolites biosynthesis, transport and catabolism	Molecular Function: ligase activity (GO:0016874);;	K01904|8.0e-65|nnu:104599134|K01904 4-coumarate--CoA ligase [EC:6.2.1.12] | (RefSeq) 4-coumarate--CoA ligase 2-like	Ubiquinone and other terpenoid-quinone biosynthesis (ko00130);; Phenylpropanoid biosynthesis (ko00940)	[I]	Lipid transport and metabolism	AMP-binding enzyme	4-coumarate--CoA ligase 1 OS=Nicotiana tabacum OX=4097 GN=4CL1 PE=2 SV=1	I	Lipid transport and metabolism	PREDICTED: 4-coumarate--CoA ligase 2-like [Nelumbo nucifera]
Nn2g13092	[J]	Translation, ribosomal structure and biogenesis	Molecular Function: double-stranded RNA binding (GO:0003725);;	K04499|6.1e-72|nta:107761826|K04499 RuvB-like protein 1 (pontin 52) | (RefSeq) uncharacterized LOC107761826	--	[J]	Translation, ribosomal structure and biogenesis	Telomere recombination	--	J	Translation, ribosomal structure and biogenesis	PREDICTED: yrdC domain-containing protein, mitochondrial isoform X1 [Nelumbo nucifera]
Nn6g33569	[P]	Inorganic ion transport and metabolism	Molecular Function: ammonium transmembrane transporter activity (GO:0008519);; Cellular Component: integral component of membrane (GO:0016021);;	K03320|6.2e-173|nnu:104608802|K03320 ammonium transporter, Amt family | (RefSeq) ammonium transporter 1 member 1-like	--	[P]	Inorganic ion transport and metabolism	Ammonium Transporter Family	Ammonium transporter 1 member 1 OS=Arabidopsis thaliana OX=3702 GN=AMT1-1 PE=1 SV=1	P	Inorganic ion transport and metabolism	PREDICTED: ammonium transporter 1 member 1-like [Nelumbo nucifera]
Nn2g13333	--	--	Cellular Component: cellular_component (GO:0005575);; Cellular Component: intracellular (GO:0005622);; Cellular Component: cell (GO:0005623);; Cellular Component: nucleus (GO:0005634);; Cellular Component: organelle (GO:0043226);; Cellular Component: membrane-bounded organelle (GO:0043227);; Cellular Component: intracellular organelle (GO:0043229);; Cellular Component: intracellular membrane-boun…	K13944|1.2e-28|dcr:108213528|K13944 LOB domain-containing protein 16 | (RefSeq) LOB domain-containing protein 16-like	--	--	--	Lateral organ boundaries (LOB) domain	LOB domain-containing protein 15 OS=Arabidopsis thaliana OX=3702 GN=LBD15 PE=1 SV=2	S	Function unknown	PREDICTED: LOB domain-containing protein 15-like [Nelumbo nucifera]
Nn2g11777	--	--	Cellular Component: nucleus (GO:0005634);; Biological Process: negative regulation of transcription, DNA-templated (GO:0045892);;	K14834|4.5e-13|peq:110018374|K14834 nucleolar complex protein 3 | (RefSeq) nucleolar complex protein 3 homolog isoform X1	--	--	--	Transcriptional repressor, ovate	Transcription repressor OFP14 OS=Arabidopsis thaliana OX=3702 GN=OFP14 PE=1 SV=1	S	Function unknown	PREDICTED: transcription repressor OFP14-like [Nelumbo nucifera]
Nn1g00931	[KL]	Transcription;; Replication, recombination and repair	Molecular Function: helicase activity (GO:0004386);; Molecular Function: ATP binding (GO:0005524);;	K20092|1.3e-140|nnu:104602396|K20092 chromodomain-helicase-DNA-binding protein 1-like [EC:3.6.4.12] | (RefSeq) probable helicase CHR10	--	[K]	Transcription	SNF2 family N-terminal domain	Probable helicase CHR10 OS=Arabidopsis thaliana OX=3702 GN=CHR10 PE=3 SV=1	K	Transcription	PREDICTED: probable helicase CHR10 isoform X2 [Nelumbo nucifera]
Nn2g15501	[J]	Translation, ribosomal structure and biogenesis	Molecular Function: protein kinase activity (GO:0004672);; Molecular Function: ATP binding (GO:0005524);; Cellular Component: integral component of membrane (GO:0016021);;	K20718|5.1e-37|pop:7482132|K20718 LRR receptor-like serine/threonine-protein kinase ERECTA [EC:2.7.11.1] | (RefSeq) LRR receptor-like serine/threonine-protein kinase ERL1	MAPK signaling pathway - plant (ko04016)	--	--	Protein tyrosine and serine/threonine kinase	Receptor protein kinase-like protein ZAR1 OS=Arabidopsis thaliana OX=3702 GN=ZAR1 PE=1 SV=1	T	Signal transduction mechanisms	PREDICTED: receptor protein kinase-like protein ZAR1 [Nelumbo nucifera]
Nn035s41624	--	--	Biological Process: ubiquitin-dependent protein catabolic process (GO:0006511);; Biological Process: protein deubiquitination (GO:0016579);; Molecular Function: thiol-dependent ubiquitinyl hydrolase activity (GO:0036459);;	K11838|7.7e-38|nnu:104601486|K11838 ubiquitin carboxyl-terminal hydrolase 7 [EC:3.4.19.12] | (RefSeq) ubiquitin carboxyl-terminal hydrolase 12	--	[O]	Posttranslational modification, protein turnover, chaperones	--	Ubiquitin carboxyl-terminal hydrolase 12 OS=Arabidopsis thaliana OX=3702 GN=UBP12 PE=1 SV=2	O	Posttranslational modification, protein turnover, chaperones	PREDICTED: ubiquitin carboxyl-terminal hydrolase 12 isoform X2 [Nelumbo nucifera]
Nn1g04296	--	--	--	--	--	--	--	--	--	--	--	hypothetical protein FH972_003102 [Carpinus fangiana]
Nn413s46585	--	--	--	--	--	--	--	--	--	--	--	hypothetical protein LR48_Vigan05g084500 [Vigna angularis]
Nn8g40345	--	--	Cellular Component: integral component of membrane (GO:0016021);;	K03283|3.5e-28|cann:107854185|K03283 heat shock 70kDa protein 1/2/6/8 | (RefSeq) heat shock cognate 70 kDa protein 2-like	Spliceosome (ko03040);; Protein processing in endoplasmic reticulum (ko04141);; Endocytosis (ko04144)	--	--	Lecithin retinol acyltransferase	Protein LEAD-SENSITIVE 1 OS=Arabidopsis thaliana OX=3702 GN=PSE1 PE=2 SV=1	S	Function unknown	PREDICTED: uncharacterized protein LOC104586691 [Nelumbo nucifera]
Nn1g08216	[O]	Posttranslational modification, protein turnover, chaperones	--	K02634|2.8e-13|han:110919534|K02634 apocytochrome f | (RefSeq) uncharacterized protein LOC110919534	Photosynthesis (ko00195)	[O]	Posttranslational modification, protein turnover, chaperones	DnaJ domain	Chaperone protein dnaJ 20, chloroplastic OS=Arabidopsis thaliana OX=3702 GN=ATJ20 PE=1 SV=2	O	Posttranslational modification, protein turnover, chaperones	PREDICTED: chaperone protein dnaJ 20, chloroplastic-like isoform X1 [Nelumbo nucifera]
Nn4g22479	[O]	Posttranslational modification, protein turnover, chaperones	Molecular Function: cysteine-type endopeptidase activity (GO:0004197);; Cellular Component: integral component of membrane (GO:0016021);; Biological Process: CAAX-box protein processing (GO:0071586);;	K07052|8.1e-149|nnu:104591591|K07052 uncharacterized protein | (RefSeq) uncharacterized LOC104591591	--	--	--	CPBP intramembrane metalloprotease	--	S	Function unknown	PREDICTED: uncharacterized protein LOC104591591 isoform X3 [Nelumbo nucifera]
Nn1g01007	[O]	Posttranslational modification, protein turnover, chaperones	Cellular Component: integral component of membrane (GO:0016021);;	K09531|2.0e-300|nnu:104602341|K09531 DnaJ homolog subfamily C member 11 | (RefSeq) chaperone protein dnaJ 13	--	[O]	Posttranslational modification, protein turnover, chaperones	Domain of unknown function (DUF3395)	Chaperone protein dnaJ 13 OS=Arabidopsis thaliana OX=3702 GN=ATJ13 PE=1 SV=2	O	Posttranslational modification, protein turnover, chaperones	PREDICTED: chaperone protein dnaJ 13 [Nelumbo nucifera]
Nn1g03877	--	--	--	--	--	--	--	--	--	--	--	PREDICTED: uncharacterized protein LOC104612264 [Nelumbo nucifera]
Nn2g14592	--	--	Cellular Component: nascent polypeptide-associated complex (GO:0005854);;	K21919|1.3e-10|fve:101312714|K21919 BTB/POZ domain-containing protein KCTD9 | (RefSeq) FH protein interacting protein FIP2-like	--	[K]	Transcription	NAC domain	Nascent polypeptide-associated complex subunit alpha-like protein 1 OS=Arabidopsis thaliana OX=3702 GN=At3g12390 PE=1 SV=1	K	Transcription	PREDICTED: nascent polypeptide-associated complex subunit alpha-like protein 1 [Nelumbo nucifera]
Nn1g02568	--	--	Biological Process: defense response to bacterium (GO:0042742);; Biological Process: defense response to fungus (GO:0050832);;	--	--	--	--	Barwin family	Pathogenesis-related protein PR-4 (Fragment) OS=Prunus persica OX=3760 PE=2 SV=1	--	--	Pathogenesis-related protein PR-4B [Vitis vinifera]
Nn2g12699	[IQ]	Lipid transport and metabolism;; Secondary metabolites biosynthesis, transport and catabolism	Molecular Function: ligase activity (GO:0016874);;	K01904|5.7e-311|nnu:104599133|K01904 4-coumarate--CoA ligase [EC:6.2.1.12] | (RefSeq) 4-coumarate--CoA ligase 2-like	Ubiquinone and other terpenoid-quinone biosynthesis (ko00130);; Phenylpropanoid biosynthesis (ko00940)	[I]	Lipid transport and metabolism	AMP-binding enzyme	4-coumarate--CoA ligase 2 OS=Nicotiana tabacum OX=4097 GN=4CL2 PE=1 SV=1	I	Lipid transport and metabolism	PREDICTED: 4-coumarate--CoA ligase 2-like [Nelumbo nucifera]
Nn5g30257	--	--	Molecular Function: calcium ion binding (GO:0005509);;	K13448|2.7e-87|nnu:104606054|K13448 calcium-binding protein CML | (RefSeq) calmodulin-like protein 1	Plant-pathogen interaction (ko04626)	[T]	Signal transduction mechanisms	EF hand	Calmodulin-like protein 30 OS=Arabidopsis thaliana OX=3702 GN=CML30 PE=2 SV=1	T	Signal transduction mechanisms	PREDICTED: calmodulin-like protein 1 [Nelumbo nucifera]
Nn3g20576	--	--	--	--	--	--	--	--	--	S	Function unknown	hypothetical protein CQW23_35335 [Capsicum baccatum]
Nn2g13077	--	--	Cellular Component: integral component of membrane (GO:0016021);;	--	--	--	--	--	--	--	--	PREDICTED: amino acid permease 6-like [Nelumbo nucifera]
Nn1g04559	--	--	Molecular Function: hydrolase activity, acting on ester bonds (GO:0016788);;	K01114|3.6e-20|nnu:104591750|K01114 phospholipase C [EC:3.1.4.3] | (RefSeq) non-specific phospholipase C6-like	Inositol phosphate metabolism (ko00562);; Glycerophospholipid metabolism (ko00564);; Ether lipid metabolism (ko00565)	--	--	--	Non-specific phospholipase C6 OS=Arabidopsis thaliana OX=3702 GN=NPC6 PE=2 SV=1	M	Cell wall/membrane/envelope biogenesis	unnamed protein product, partial [Vitis vinifera]
Nn1g04461	--	--	Molecular Function: protein kinase activity (GO:0004672);; Molecular Function: ATP binding (GO:0005524);; Cellular Component: integral component of membrane (GO:0016021);;	K13416|6.7e-12|dzi:111309127|K13416 brassinosteroid insensitive 1-associated receptor kinase 1 [EC:2.7.10.1 2.7.11.1] | (RefSeq) BRASSINOSTEROID INSENSITIVE 1-associated receptor kinase 1-like isoform X1	MAPK signaling pathway - plant (ko04016);; Plant hormone signal transduction (ko04075);; Plant-pathogen interaction (ko04626)	--	--	Leucine rich repeat N-terminal domain	Protein MALE DISCOVERER 2 OS=Arabidopsis thaliana OX=3702 GN=MDIS2 PE=1 SV=1	T	Signal transduction mechanisms	PREDICTED: protein MALE DISCOVERER 1-like [Nelumbo nucifera]
Nn2g11378	[G]	Carbohydrate transport and metabolism	Molecular Function: hydrolase activity, hydrolyzing O-glycosyl compounds (GO:0004553);; Biological Process: carbohydrate metabolic process (GO:0005975);;	K05349|1.9e-262|nnu:104596995|K05349 beta-glucosidase [EC:3.2.1.21] | (RefSeq) beta-glucosidase BoGH3B-like	Cyanoamino acid metabolism (ko00460);; Starch and sucrose metabolism (ko00500);; Phenylpropanoid biosynthesis (ko00940)	--	--	Glycosyl hydrolase family 3 N terminal domain	Probable beta-D-xylosidase 6 OS=Arabidopsis thaliana OX=3702 GN=BXL6 PE=2 SV=1	G	Carbohydrate transport and metabolism	PREDICTED: uncharacterized protein LOC104596995 isoform X1 [Nelumbo nucifera]
Nn5g29646	[GI]	Carbohydrate transport and metabolism;; Lipid transport and metabolism	Molecular Function: pectinesterase activity (GO:0030599);; Biological Process: cell wall modification (GO:0042545);; Molecular Function: aspartyl esterase activity (GO:0045330);;	K01051|7.3e-200|nnu:109114579|K01051 pectinesterase [EC:3.1.1.11] | (RefSeq) putative pectinesterase 11	Pentose and glucuronate interconversions (ko00040)	--	--	Pectinesterase	Putative pectinesterase 11 OS=Arabidopsis thaliana OX=3702 GN=PME11 PE=3 SV=1	Q	Secondary metabolites biosynthesis, transport and catabolism	PREDICTED: putative pectinesterase 11 [Nelumbo nucifera]
Nn3g20290	--	--	Molecular Function: chaperone binding (GO:0051087);;	--	--	[T]	Signal transduction mechanisms	--	BAG family molecular chaperone regulator 2 OS=Arabidopsis thaliana OX=3702 GN=BAG2 PE=1 SV=1	T	Signal transduction mechanisms	PREDICTED: BAG family molecular chaperone regulator 3-like [Nelumbo nucifera]
Nn3g18479	--	--	Biological Process: gravitropism (GO:0009630);;	K12309|1.0e-54|lja:Lj3g3v0323160.1|K12309 beta-galactosidase [EC:3.2.1.23] | (RefSeq) Lj3g3v0323160.1; -	Galactose metabolism (ko00052);; Other glycan degradation (ko00511);; Glycosaminoglycan degradation (ko00531);; Sphingolipid metabolism (ko00600);; Glycosphingolipid biosynthesis - ganglio series (ko00604)	[R]	General function prediction only	Zinc finger, C2H2 type	Protein indeterminate-domain 14 OS=Arabidopsis thaliana OX=3702 GN=IDD14 PE=1 SV=1	S	Function unknown	PREDICTED: protein indeterminate-domain 16-like [Nelumbo nucifera]
Nn7g38167	[EF]	Amino acid transport and metabolism;; Nucleotide transport and metabolism	Molecular Function: carbamoyl-phosphate synthase (glutamine-hydrolyzing) activity (GO:0004088);; Biological Process: 'de novo' pyrimidine nucleobase biosynthetic process (GO:0006207);; Biological Process: glutamine metabolic process (GO:0006541);;	K01956|2.6e-244|nnu:104611000|K01956 carbamoyl-phosphate synthase small subunit [EC:6.3.5.5] | (RefSeq) carbamoyl-phosphate synthase small chain, chloroplastic	Pyrimidine metabolism (ko00240);; Alanine, aspartate and glutamate metabolism (ko00250)	[R]	General function prediction only	Carbamoyl-phosphate synthase small chain, CPSase domain	Carbamoyl-phosphate synthase small chain, chloroplastic OS=Arabidopsis thaliana OX=3702 GN=CARA PE=1 SV=1	--	--	PREDICTED: carbamoyl-phosphate synthase small chain, chloroplastic [Nelumbo nucifera]
Nn2g11110	--	--	Cellular Component: integral component of membrane (GO:0016021);;	--	--	--	--	--	--	--	--	hypothetical protein CISIN_1g037569mg [Citrus sinensis]
Nn6g31902	--	--	Biological Process: reproduction (GO:0000003);; Cellular Component: ubiquitin ligase complex (GO:0000151);; Molecular Function: inositol hexakisphosphate binding (GO:0000822);; Biological Process: developmental process involved in reproduction (GO:0003006);; Molecular Function: molecular_function (GO:0003674);; Molecular Function: catalytic activity (GO:0003824);; Molecular Function: ubiquitin-pr…	K14485|9.3e-18|nnu:104585903|K14485 transport inhibitor response 1 | (RefSeq) protein TRANSPORT INHIBITOR RESPONSE 1-like	Plant hormone signal transduction (ko04075)	[R]	General function prediction only	--	Protein TRANSPORT INHIBITOR RESPONSE 1 OS=Arabidopsis thaliana OX=3702 GN=TIR1 PE=1 SV=2	L	Replication, recombination and repair	PREDICTED: protein TRANSPORT INHIBITOR RESPONSE 1-like [Nelumbo nucifera]
Nn6g35365	--	--	Biological Process: fatty acid biosynthetic process (GO:0006633);; Cellular Component: membrane (GO:0016020);; Molecular Function: transferase activity, transferring acyl groups other than amino-acyl groups (GO:0016747);;	K15397|4.0e-60|nnu:104587752|K15397 3-ketoacyl-CoA synthase [EC:2.3.1.199] | (RefSeq) 3-ketoacyl-CoA synthase 4	Fatty acid elongation (ko00062);; Plant-pathogen interaction (ko04626)	--	--	FAE1/Type III polyketide synthase-like protein	3-ketoacyl-CoA synthase 4 OS=Arabidopsis thaliana OX=3702 GN=KCS4 PE=2 SV=1	I	Lipid transport and metabolism	PREDICTED: 3-ketoacyl-CoA synthase 4-like [Nelumbo nucifera]
Nn3g16606	--	--	Molecular Function: molecular_function (GO:0003674);; Molecular Function: catalytic activity (GO:0003824);; Cellular Component: cellular_component (GO:0005575);; Cellular Component: intracellular (GO:0005622);; Cellular Component: cell (GO:0005623);; Cellular Component: cytoplasm (GO:0005737);; Cellular Component: cytosol (GO:0005829);; Biological Process: phosphorus metabolic process (GO:0006793…	--	--	--	--	--	--	S	Function unknown	PREDICTED: uncharacterized protein LOC104593002 isoform X2 [Nelumbo nucifera]
Nn2g14582	--	--	Molecular Function: beta-N-acetylhexosaminidase activity (GO:0004563);; Biological Process: carbohydrate metabolic process (GO:0005975);;	K12373|1.1e-10|nnu:104612173|K12373 hexosaminidase [EC:3.2.1.52] | (RefSeq) beta-hexosaminidase 3-like	Other glycan degradation (ko00511);; Various types of N-glycan biosynthesis (ko00513);; Amino sugar and nucleotide sugar metabolism (ko00520);; Glycosaminoglycan degradation (ko00531);; Glycosphingolipid biosynthesis - globo and isoglobo series (ko00603);; Glycosphingolipid biosynthesis - ganglio series (ko00604)	--	--	--	Beta-hexosaminidase 3 OS=Arabidopsis thaliana OX=3702 GN=HEXO3 PE=1 SV=1	G	Carbohydrate transport and metabolism	PREDICTED: beta-hexosaminidase 3-like [Nelumbo nucifera]
Nn4g24665	[R]	General function prediction only	Molecular Function: ADP binding (GO:0043531);;	K15078|2.1e-116|tcc:18614561|K15078 structure-specific endonuclease subunit SLX1 [EC:3.6.1.-] | (RefSeq) putative disease resistance protein RGA3	--	[T]	Signal transduction mechanisms	NB-ARC domain	Putative disease resistance RPP13-like protein 1 OS=Arabidopsis thaliana OX=3702 GN=RPPL1 PE=3 SV=1	T	Signal transduction mechanisms	PREDICTED: putative disease resistance RPP13-like protein 1 [Nelumbo nucifera]
Nn7g38240	--	--	Cellular Component: integral component of membrane (GO:0016021);;	--	--	--	--	--	--	--	--	PREDICTED: uncharacterized protein LOC104599672 [Nelumbo nucifera]
Nn1g03995	[G]	Carbohydrate transport and metabolism	Cellular Component: integral component of membrane (GO:0016021);;	K03011|1.3e-24|ghi:107953086|K03011 DNA-directed RNA polymerase II subunit RPB3 | (RefSeq) uncharacterized protein LOC107953086	RNA polymerase (ko03020)	--	--	Protein of unknown function (DUF616)	Probable hexosyltransferase MUCI70 OS=Arabidopsis thaliana OX=3702 GN=MUCI70 PE=1 SV=1	S	Function unknown	PREDICTED: uncharacterized protein LOC104586462 [Nelumbo nucifera]
Nn5g28541	--	--	Molecular Function: electron carrier activity (GO:0009055);;	--	--	--	--	Plastocyanin-like domain	Chemocyanin OS=Lilium longiflorum OX=4690 PE=1 SV=1	S	Function unknown	PREDICTED: basic blue protein-like [Nelumbo nucifera]
Nn2g10966	--	--	--	K03549|7.3e-07|cann:107865483|K03549 KUP system potassium uptake protein | (RefSeq) potassium transporter 5-like	--	--	--	Peptide N-acetyl-beta-D-glucosaminyl asparaginase amidase A	Peptide-N4-(N-acetyl-beta-glucosaminyl)asparagine amidase A OS=Prunus dulcis OX=3755 PE=1 SV=2	S	Function unknown	PREDICTED: peptide-N4-(N-acetyl-beta-glucosaminyl)asparagine amidase A-like [Nelumbo nucifera]
Nn1g09651	--	--	Molecular Function: lipid transporter activity (GO:0005319);; Cellular Component: integral component of membrane (GO:0016021);;	K06316|1.3e-244|nnu:104605222|K06316 oligosaccharide translocation protein RFT1 | (RefSeq) protein RFT1 homolog	--	[D]	Cell cycle control, cell division, chromosome partitioning	Rft protein	--	D	Cell cycle control, cell division, chromosome partitioning	PREDICTED: protein RFT1 homolog isoform X1 [Nelumbo nucifera]
Nn2g13992	[O]	Posttranslational modification, protein turnover, chaperones	Cellular Component: integral component of membrane (GO:0016021);; Biological Process: sterol biosynthetic process (GO:0016126);; Molecular Function: oxidoreductase activity, acting on the CH-CH group of donors, NAD or NADP as acceptor (GO:0016628);;	K00222|1.0e-215|nnu:104612501|K00222 Delta14-sterol reductase [EC:1.3.1.70] | (RefSeq) delta(14)-sterol reductase	Steroid biosynthesis (ko00100)	[IT]	Lipid transport and metabolism;; Signal transduction mechanisms	Ergosterol biosynthesis ERG4/ERG24 family	Delta(14)-sterol reductase OS=Arabidopsis thaliana OX=3702 GN=FK PE=1 SV=2	--	--	PREDICTED: delta(14)-sterol reductase [Nelumbo nucifera]
Nn1g03851	[HT]	Coenzyme transport and metabolism;; Signal transduction mechanisms	Cellular Component: integral component of membrane (GO:0016021);; Molecular Function: kinase activity (GO:0016301);;	K08869|0.0e+00|nnu:104612249|K08869 aarF domain-containing kinase | (RefSeq) probable serine/threonine-protein kinase abkC	--	[R]	General function prediction only	ABC1 family	Secreted RxLR effector protein 27 OS=Plasmopara viticola OX=143451 GN=RxLR27 PE=2 SV=1	K	Transcription	PREDICTED: probable serine/threonine-protein kinase abkC isoform X2 [Nelumbo nucifera]
Nn5g27482	[J]	Translation, ribosomal structure and biogenesis	Molecular Function: N-acetyltransferase activity (GO:0008080);;	--	--	--	--	Acetyltransferase (GNAT) family	--	S	Function unknown	PREDICTED: uncharacterized protein LOC104588625 [Nelumbo nucifera]
Nn4g26242	[J]	Translation, ribosomal structure and biogenesis	Molecular Function: structural constituent of ribosome (GO:0003735);; Biological Process: translation (GO:0006412);; Cellular Component: large ribosomal subunit (GO:0015934);;	K02898|1.1e-75|nnu:104612302|K02898 large subunit ribosomal protein L26e | (RefSeq) 60S ribosomal protein L26-1-like	Ribosome (ko03010)	[J]	Translation, ribosomal structure and biogenesis	Ribosomal proteins L26 eukaryotic, L24P archaeal	60S ribosomal protein L26-1 OS=Arabidopsis thaliana OX=3702 GN=RPL26A PE=2 SV=2	J	Translation, ribosomal structure and biogenesis	PREDICTED: 60S ribosomal protein L26-1-like [Nelumbo nucifera]
Nn2g13497	--	--	Cellular Component: Golgi apparatus (GO:0005794);; Cellular Component: integral component of membrane (GO:0016021);; Biological Process: vesicle-mediated transport (GO:0016192);;	K22940|6.2e-45|nnu:104601124|K22940 protein YIPF1/2 | (RefSeq) protein YIPF1 homolog	--	[S]	Function unknown	--	--	S	Function unknown	PREDICTED: protein YIPF1-like isoform X2 [Nelumbo nucifera]
Nn2g10425	--	--	Biological Process: chlorophyll biosynthetic process (GO:0015995);; Molecular Function: magnesium chelatase activity (GO:0016851);;	--	--	--	--	CobN/Magnesium Chelatase	--	H	Coenzyme transport and metabolism	hypothetical protein M569_09907 [Genlisea aurea]
Nn3g20888	--	--	Cellular Component: integral component of membrane (GO:0016021);;	K03251|1.4e-17|obr:102709085|K03251 translation initiation factor 3 subunit D | (RefSeq) eukaryotic translation initiation factor 3 subunit D-like	RNA transport (ko03013)	--	--	Cold acclimation protein WCOR413	Cold-regulated 413 inner membrane protein 2, chloroplastic OS=Arabidopsis thaliana OX=3702 GN=COR413IM2 PE=1 SV=1	S	Function unknown	PREDICTED: cold-regulated 413 inner membrane protein 1, chloroplastic-like [Nelumbo nucifera]
Nn236s45584	--	--	--	--	--	--	--	--	--	--	--	hypothetical protein LR48_Vigan05g084500 [Vigna angularis]
Nn4g24548	--	--	Biological Process: microtubule cytoskeleton organization (GO:0000226);; Molecular Function: microtubule binding (GO:0008017);;	K16732|1.5e-292|nnu:104607245|K16732 protein regulator of cytokinesis 1 | (RefSeq) 65-kDa microtubule-associated protein 6-like	--	[DZ]	Cell cycle control, cell division, chromosome partitioning;; Cytoskeleton	Microtubule associated protein (MAP65/ASE1 family)	65-kDa microtubule-associated protein 6 OS=Arabidopsis thaliana OX=3702 GN=MAP65-6 PE=1 SV=1	--	--	PREDICTED: 65-kDa microtubule-associated protein 6-like isoform X1 [Nelumbo nucifera]
Nn4g26557	--	--	Biological Process: ubiquitin-dependent protein catabolic process (GO:0006511);; Cellular Component: cullin-RING ubiquitin ligase complex (GO:0031461);; Molecular Function: ubiquitin protein ligase binding (GO:0031625);;	K10609|0.0e+00|nnu:104610146|K10609 cullin 4 | (RefSeq) cullin-4-like	Nucleotide excision repair (ko03420);; Ubiquitin mediated proteolysis (ko04120)	[D]	Cell cycle control, cell division, chromosome partitioning	Cullin family	Cullin-4 OS=Arabidopsis thaliana OX=3702 GN=CUL4 PE=1 SV=1	D	Cell cycle control, cell division, chromosome partitioning	PREDICTED: cullin-4-like [Nelumbo nucifera]
Nn2g14808	[M]	Cell wall/membrane/envelope biogenesis	Molecular Function: hydrolase activity, acting on ester bonds (GO:0016788);;	K01114|1.6e-293|nnu:104606085|K01114 phospholipase C [EC:3.1.4.3] | (RefSeq) non-specific phospholipase C2-like	Inositol phosphate metabolism (ko00562);; Glycerophospholipid metabolism (ko00564);; Ether lipid metabolism (ko00565)	--	--	Phosphoesterase family	Non-specific phospholipase C2 OS=Arabidopsis thaliana OX=3702 GN=NPC2 PE=2 SV=1	M	Cell wall/membrane/envelope biogenesis	PREDICTED: non-specific phospholipase C2-like, partial [Nelumbo nucifera]
Nn1g09881	--	--	--	--	--	[S]	Function unknown	Uncharacterized conserved protein (DUF2054)	--	S	Function unknown	PREDICTED: uncharacterized protein LOC104586086 [Nelumbo nucifera]
Nn2g13651	--	--	Molecular Function: motor activity (GO:0003774);; Cellular Component: myosin complex (GO:0016459);;	--	--	--	--	Unconventional myosin tail, actin- and lipid-binding	--	S	Function unknown	PREDICTED: myosin IB heavy chain [Nelumbo nucifera]
Nn2g15542	--	--	Molecular Function: molecular_function (GO:0003674);; Molecular Function: enzyme inhibitor activity (GO:0004857);; Molecular Function: protein binding (GO:0005515);; Cellular Component: cellular_component (GO:0005575);; Cellular Component: cell wall (GO:0005618);; Cellular Component: intracellular (GO:0005622);; Cellular Component: cell (GO:0005623);; Cellular Component: cytoplasm (GO:0005737);; …	K13420|6.2e-10|cam:101514714|K13420 LRR receptor-like serine/threonine-protein kinase FLS2 [EC:2.7.11.1] | (RefSeq) probable LRR receptor-like serine/threonine-protein kinase At3g47570	MAPK signaling pathway - plant (ko04016);; Plant-pathogen interaction (ko04626)	--	--	Leucine rich repeat	Polygalacturonase inhibitor 2 OS=Arabidopsis thaliana OX=3702 GN=PGIP2 PE=2 SV=2	S	Function unknown	PREDICTED: polygalacturonase inhibitor-like [Nelumbo nucifera]
Nn8g41173	[J]	Translation, ribosomal structure and biogenesis	Molecular Function: nucleic acid binding (GO:0003676);; Molecular Function: aspartate-tRNA ligase activity (GO:0004815);; Molecular Function: ATP binding (GO:0005524);; Cellular Component: cytoplasm (GO:0005737);; Biological Process: aspartyl-tRNA aminoacylation (GO:0006422);;	K22503|1.4e-205|nnu:104611773|K22503 aspartyl-tRNA synthetase [EC:6.1.1.12] | (RefSeq) aspartate--tRNA ligase 2, cytoplasmic-like	Aminoacyl-tRNA biosynthesis (ko00970)	[J]	Translation, ribosomal structure and biogenesis	tRNA synthetases class II (D, K and N)	Aspartate--tRNA ligase 2, cytoplasmic OS=Arabidopsis thaliana OX=3702 GN=IBI1 PE=1 SV=1	J	Translation, ribosomal structure and biogenesis	PREDICTED: aspartate--tRNA ligase 2, cytoplasmic-like [Nelumbo nucifera]
Nn1g04288	--	--	Cellular Component: nuclear pore (GO:0005643);; Molecular Function: structural constituent of nuclear pore (GO:0017056);;	K14297|8.2e-52|nnu:104600046|K14297 nuclear pore complex protein Nup98-Nup96 | (RefSeq) nuclear pore complex protein NUP96	RNA transport (ko03013)	[YU]	Nuclear structure;; Intracellular trafficking, secretion, and vesicular transport	--	Nuclear pore complex protein NUP96 OS=Arabidopsis thaliana OX=3702 GN=NUP96 PE=1 SV=1	--	--	PREDICTED: nuclear pore complex protein NUP96 [Nelumbo nucifera]
Nn1g07635	--	--	Cellular Component: photosystem I (GO:0009522);; Biological Process: photosynthesis (GO:0015979);; Cellular Component: integral component of membrane (GO:0016021);;	K08905|2.0e-89|nnu:104594345|K08905 photosystem I subunit V | (RefSeq) photosystem I reaction center subunit V, chloroplastic	Photosynthesis (ko00195)	--	--	Photosystem I psaG / psaK	Photosystem I reaction center subunit V, chloroplastic OS=Arabidopsis thaliana OX=3702 GN=PSAG PE=1 SV=1	S	Function unknown	PREDICTED: photosystem I reaction center subunit V, chloroplastic [Nelumbo nucifera]
Nn5g28215	--	--	Cellular Component: integral component of membrane (GO:0016021);; Molecular Function: transmembrane transporter activity (GO:0022857);;	K17500|3.5e-51|nto:104085001|K17500 integrin-linked kinase-associated serine/threonine phosphatase 2C [EC:3.1.3.16] | (RefSeq) WAT1-related protein At3g18200 isoform X1	--	--	--	EamA-like transporter family	WAT1-related protein At1g21890 OS=Arabidopsis thaliana OX=3702 GN=At1g21890 PE=2 SV=1	S	Function unknown	PREDICTED: WAT1-related protein At1g21890-like [Nelumbo nucifera]
Nn1g08928	[M]	Cell wall/membrane/envelope biogenesis	Molecular Function: hydrolase activity, acting on ester bonds (GO:0016788);;	K01114|2.4e-90|nnu:104585630|K01114 phospholipase C [EC:3.1.4.3] | (RefSeq) non-specific phospholipase C3-like	Inositol phosphate metabolism (ko00562);; Glycerophospholipid metabolism (ko00564);; Ether lipid metabolism (ko00565)	--	--	Phosphoesterase family	Non-specific phospholipase C4 OS=Arabidopsis thaliana OX=3702 GN=NPC4 PE=1 SV=1	M	Cell wall/membrane/envelope biogenesis	PREDICTED: non-specific phospholipase C3-like [Nelumbo nucifera]
Nn1g00997	--	--	Cellular Component: integral component of membrane (GO:0016021);; Molecular Function: transferase activity (GO:0016740);;	K20890|3.5e-16|qsu:112017390|K20890 xylan alpha-glucuronosyltransferase [EC:2.4.1.-] | (RefSeq) putative UDP-glucuronate:xylan alpha-glucuronosyltransferase 4	--	[G]	Carbohydrate transport and metabolism	--	Putative glucuronosyltransferase PGSIP8 OS=Arabidopsis thaliana OX=3702 GN=PGSIP8 PE=2 SV=1	M	Cell wall/membrane/envelope biogenesis	PREDICTED: putative glucuronosyltransferase PGSIP8 [Nelumbo nucifera]
Nn3g18655	--	--	--	--	--	--	--	--	--	S	Function unknown	PREDICTED: uncharacterized protein LOC104592364 [Nelumbo nucifera]
Nn2g12240	[G]	Carbohydrate transport and metabolism	Biological Process: carbohydrate transport (GO:0008643);; Cellular Component: integral component of membrane (GO:0016021);; Molecular Function: transmembrane transporter activity (GO:0022857);;	K24193|3.3e-267|nnu:104603391|K24193 MFS transporter, SP family, sugar:H+ symporter | (RefSeq) sugar transport protein 7-like	--	[R]	General function prediction only	Sugar (and other) transporter	Sugar transport protein 7 OS=Arabidopsis thaliana OX=3702 GN=STP7 PE=1 SV=1	U	Intracellular trafficking, secretion, and vesicular transport	PREDICTED: sugar transport protein 7-like [Nelumbo nucifera]
Nn4g22386	--	--	Molecular Function: double-stranded DNA binding (GO:0003690);; Biological Process: regulation of transcription, DNA-templated (GO:0006355);;	K15032|2.5e-183|nnu:104591670|K15032 mTERF domain-containing protein, mitochondrial | (RefSeq) transcription termination factor MTERF5, chloroplastic	--	[KR]	Transcription;; General function prediction only	mTERF	Transcription termination factor MTERF5, chloroplastic OS=Arabidopsis thaliana OX=3702 GN=MTERF5 PE=1 SV=1	K	Transcription	PREDICTED: transcription termination factor MTERF5, chloroplastic isoform X2 [Nelumbo nucifera]
Nn3g16782	--	--	--	--	--	--	--	--	--	--	--	PREDICTED: uncharacterized protein LOC104593138 isoform X2 [Nelumbo nucifera]
Nn7g36953	--	--	Cellular Component: integral component of membrane (GO:0016021);; Molecular Function: transmembrane transporter activity (GO:0022857);;	K14638|2.2e-101|lsv:111891766|K14638 solute carrier family 15 (peptide/histidine transporter), member 3/4 | (RefSeq) protein NRT1/ PTR FAMILY 3.1-like	--	[E]	Amino acid transport and metabolism	POT family	Protein NRT1/ PTR FAMILY 3.1 OS=Arabidopsis thaliana OX=3702 GN=NPF3.1 PE=2 SV=1	E	Amino acid transport and metabolism	PREDICTED: protein NRT1/ PTR FAMILY 3.1-like [Nelumbo nucifera]
Nn5g27003	--	--	--	--	--	--	--	--	--	--	--	hypothetical protein E2542_SST04476 [Spatholobus suberectus]
Nn1g05383	--	--	Cellular Component: integral component of membrane (GO:0016021);;	K23870|4.0e-72|sita:101752622|K23870 putative pectin methyltransferase [EC:2.1.1.-] | (RefSeq) probable pectin methyltransferase QUA2	--	[S]	Function unknown	Thioredoxin	5'-adenylylsulfate reductase-like 4 OS=Arabidopsis thaliana OX=3702 GN=APRL4 PE=2 SV=1	S	Function unknown	PREDICTED: 5'-adenylylsulfate reductase-like 4 [Nelumbo nucifera]
Nn6g31537	[T]	Signal transduction mechanisms	Molecular Function: protein kinase activity (GO:0004672);; Molecular Function: ATP binding (GO:0005524);; Cellular Component: integral component of membrane (GO:0016021);;	K13435|3.6e-102|spen:107018783|K13435 serine/threonine-protein kinase Pto | (RefSeq) receptor-like protein kinase HERK 1 isoform X2	Plant-pathogen interaction (ko04626)	[T]	Signal transduction mechanisms	Protein tyrosine and serine/threonine kinase	Probable receptor-like protein kinase At4g39110 OS=Arabidopsis thaliana OX=3702 GN=At4g39110 PE=3 SV=1	T	Signal transduction mechanisms	PREDICTED: probable receptor-like protein kinase At4g39110 [Nelumbo nucifera]
Nn4g22309	[L]	Replication, recombination and repair	Molecular Function: dioxygenase activity (GO:0051213);;	K10765|4.7e-213|nnu:104591731|K10765 alkylated DNA repair protein alkB homolog 1 [EC:1.14.11.51 4.2.99.18 1.14.11.-] | (RefSeq) alpha-ketoglutarate-dependent dioxygenase alkB	--	[A]	RNA processing and modification	2OG-Fe(II) oxygenase superfamily	Alpha-ketoglutarate-dependent dioxygenase alkB OS=Arabidopsis thaliana OX=3702 GN=At1g11780 PE=2 SV=2	A	RNA processing and modification	PREDICTED: alpha-ketoglutarate-dependent dioxygenase alkB isoform X1 [Nelumbo nucifera]
Nn2g12257	--	--	--	K21594|3.6e-12|pxb:103946988|K21594 translation factor GUF1, mitochondrial [EC:3.6.5.-] | (RefSeq) translation factor GUF1 homolog, mitochondrial-like	--	--	--	--	--	S	Function unknown	PREDICTED: uncharacterized protein LOC104603379 [Nelumbo nucifera]
Nn4g24793	--	--	--	--	--	--	--	Myb/SANT-like DNA-binding domain	--	--	--	PREDICTED: L10-interacting MYB domain-containing protein-like [Nelumbo nucifera]
Nn315s46310	--	--	--	--	--	--	--	--	--	--	--	hypothetical protein CSA_004614 [Cucumis sativus]
Nn4g23612	--	--	--	K14772|0.0e+00|nnu:104597815|K14772 U3 small nucleolar RNA-associated protein 20 | (RefSeq) small subunit processome component 20 homolog	--	[V]	Defense mechanisms	Down-regulated in metastasis	--	V	Defense mechanisms	PREDICTED: small subunit processome component 20 homolog [Nelumbo nucifera]
Nn5g27484	[Q]	Secondary metabolites biosynthesis, transport and catabolism	Molecular Function: oxidoreductase activity (GO:0016491);; Molecular Function: isomerase activity (GO:0016853);;	K09835|1.4e-51|ccav:112518493|K09835 prolycopene isomerase [EC:5.2.1.13] | (RefSeq) prolycopene isomerase, chloroplastic isoform X1	Carotenoid biosynthesis (ko00906)	[H]	Coenzyme transport and metabolism	--	Prolycopene isomerase, chloroplastic OS=Daucus carota OX=4039 GN=CRTISO PE=2 SV=1	H	Coenzyme transport and metabolism	PREDICTED: prolycopene isomerase, chloroplastic [Nelumbo nucifera]
Nn1g06255	--	--	--	--	--	--	--	--	BTB/POZ domain-containing protein At2g13690 OS=Arabidopsis thaliana OX=3702 GN=PRL1-IFG PE=2 SV=2	S	Function unknown	PREDICTED: BTB/POZ domain-containing protein At2g13690-like [Nelumbo nucifera]
Nn5g27471	[T]	Signal transduction mechanisms	Molecular Function: phosphoprotein phosphatase activity (GO:0004721);; Molecular Function: metal ion binding (GO:0046872);;	K06269|3.6e-88|aof:109825741|K06269 serine/threonine-protein phosphatase PP1 catalytic subunit [EC:3.1.3.16] | (RefSeq) serine/threonine-protein phosphatase PP1	mRNA surveillance pathway (ko03015)	[TR]	Signal transduction mechanisms;; General function prediction only	Calcineurin-like phosphoesterase	Serine/threonine-protein phosphatase PP1 OS=Medicago sativa subsp. varia OX=36902 GN=PP1 PE=2 SV=1	T	Signal transduction mechanisms	uncharacterized protein A4U43_C01F19090 [Asparagus officinalis]
Nn2g15594	--	--	Molecular Function: oxidoreductase activity, acting on single donors with incorporation of molecular oxygen, incorporation of two atoms of oxygen (GO:0016702);; Biological Process: oxylipin biosynthetic process (GO:0031408);; Molecular Function: metal ion binding (GO:0046872);;	K00454|0.0e+00|nnu:104603494|K00454 lipoxygenase [EC:1.13.11.12] | (RefSeq) linoleate 13S-lipoxygenase 2-1, chloroplastic	Linoleic acid metabolism (ko00591);; alpha-Linolenic acid metabolism (ko00592)	--	--	Lipoxygenase	Linoleate 13S-lipoxygenase 2-1, chloroplastic OS=Solanum tuberosum OX=4113 GN=LOX2.1 PE=1 SV=1	E	Amino acid transport and metabolism	PREDICTED: linoleate 13S-lipoxygenase 2-1, chloroplastic [Nelumbo nucifera]
Nn1g05853	[J]	Translation, ribosomal structure and biogenesis	Molecular Function: RNA binding (GO:0003723);;	K13201|1.9e-45|csl:COCSUDRAFT_20324|K13201 nucleolysin TIA-1/TIAR | (RefSeq) RNA-binding domain-containing protein	--	[R]	General function prediction only	RNA recognition motif. (a.k.a. RRM, RBD, or RNP domain)	Polyadenylate-binding protein RBP47 OS=Nicotiana plumbaginifolia OX=4092 GN=RBP47 PE=1 SV=1	A	RNA processing and modification	PREDICTED: polyadenylate-binding protein RBP47-like isoform X1 [Nelumbo nucifera]
Nn3g17831	--	--	Molecular Function: protein dimerization activity (GO:0046983);;	--	--	--	--	--	--	K	Transcription	PREDICTED: transcription factor ABORTED MICROSPORES-like isoform X2 [Nelumbo nucifera]
Nn6g31596	--	--	Molecular Function: transcription factor activity, sequence-specific DNA binding (GO:0003700);;	--	--	--	--	Basic region leucine zipper	bZIP transcription factor 50 OS=Oryza sativa subsp. japonica OX=39947 GN=BZIP50 PE=2 SV=1	L	Replication, recombination and repair	PREDICTED: bZIP transcription factor 60 [Nelumbo nucifera]
Nn1g01463	--	--	Biological Process: response to abscisic acid (GO:0009737);;	--	--	--	--	CAP160 repeat	Low-temperature-induced 65 kDa protein OS=Arabidopsis thaliana OX=3702 GN=LTI65 PE=2 SV=2	S	Function unknown	PREDICTED: low-temperature-induced 65 kDa protein isoform X1 [Nelumbo nucifera]
Nn1g07189	--	--	--	--	--	--	--	Petal formation-expressed	Probable F-box protein At4g22030 OS=Arabidopsis thaliana OX=3702 GN=At4g22030 PE=4 SV=1	S	Function unknown	PREDICTED: probable F-box protein At4g22030 [Nelumbo nucifera]
Nn1g02073	--	--	Molecular Function: methyltransferase activity (GO:0008168);; Cellular Component: integral component of membrane (GO:0016021);; Biological Process: methylation (GO:0032259);;	K23872|9.6e-72|smo:SELMODRAFT_168608|K23872 putative homogalacturonan methyltransferase [EC:2.1.1.-] | (RefSeq) hypothetical protein	--	--	--	Putative S-adenosyl-L-methionine-dependent methyltransferase	Probable methyltransferase PMT21 OS=Arabidopsis thaliana OX=3702 GN=ERD3 PE=2 SV=1	S	Function unknown	PREDICTED: probable methyltransferase PMT21 [Nelumbo nucifera]
Nn221s45340	--	--	--	--	--	--	--	--	--	--	--	uncharacterized protein LOC118033973 [Populus alba]
Nn1g00683	--	--	Cellular Component: endoplasmic reticulum membrane (GO:0005789);; Biological Process: protein glycosylation (GO:0006486);; Biological Process: oligosaccharide-lipid intermediate biosynthetic process (GO:0006490);; Cellular Component: integral component of membrane (GO:0016021);; Molecular Function: dolichyl pyrophosphate Glc1Man9GlcNAc2 alpha-1,3-glucosyltransferase activity (GO:0042283);;	K03849|0.0e+00|nnu:104609859|K03849 alpha-1,3-glucosyltransferase [EC:2.4.1.265] | (RefSeq) probable dolichyl pyrophosphate Glc1Man9GlcNAc2 alpha-1,3-glucosyltransferase	N-Glycan biosynthesis (ko00510)	[K]	Transcription	ALG6, ALG8 glycosyltransferase family	Probable dolichyl pyrophosphate Glc1Man9GlcNAc2 alpha-1,3-glucosyltransferase OS=Arabidopsis thaliana OX=3702 GN=At2g44660 PE=2 SV=3	G	Carbohydrate transport and metabolism	PREDICTED: probable dolichyl pyrophosphate Glc1Man9GlcNAc2 alpha-1,3-glucosyltransferase [Nelumbo nucifera]
Nn2g14007	--	--	Biological Process: cell morphogenesis (GO:0000902);; Biological Process: post-chaperonin tubulin folding pathway (GO:0007023);; Molecular Function: tubulin binding (GO:0015631);;	K21766|5.5e-198|nnu:104612492|K21766 tubulin-specific chaperone C | (RefSeq) tubulin-folding cofactor C	--	[O]	Posttranslational modification, protein turnover, chaperones	Tubulin binding cofactor C	Tubulin-folding cofactor C OS=Arabidopsis thaliana OX=3702 GN=TFCC PE=1 SV=1	O	Posttranslational modification, protein turnover, chaperones	PREDICTED: tubulin-folding cofactor C [Nelumbo nucifera]
Nn1g08718	--	--	Cellular Component: extracellular region (GO:0005576);; Biological Process: rejection of self pollen (GO:0060320);;	--	--	--	--	Plant self-incompatibility protein S1	S-protein homolog 24 OS=Arabidopsis thaliana OX=3702 GN=SPH24 PE=3 SV=1	S	Function unknown	PREDICTED: uncharacterized protein LOC104609695 [Nelumbo nucifera]
Nn5g30714	--	--	Molecular Function: structural constituent of ribosome (GO:0003735);; Cellular Component: ribosome (GO:0005840);; Biological Process: translation (GO:0006412);; Cellular Component: chloroplast (GO:0009507);; Molecular Function: rRNA binding (GO:0019843);;	K19035|3.0e-38|nnu:104589113|K19035 50S ribosomal protein 6 | (RefSeq) 50S ribosomal protein 6, chloroplastic	--	--	--	Family of unknown function (DUF5323)	50S ribosomal protein 6, chloroplastic OS=Arabidopsis thaliana OX=3702 GN=PSRP6 PE=3 SV=1	J	Translation, ribosomal structure and biogenesis	PREDICTED: 50S ribosomal protein 6, chloroplastic [Nelumbo nucifera]
Nelumbo_nucifera_newGene_1499	--	--	--	--	--	--	--	--	--	--	--	PREDICTED: uncharacterized protein LOC104589039 [Nelumbo nucifera]
Nn8g39522	--	--	--	--	--	--	--	--	--	--	--	PREDICTED: myosin-10 [Nelumbo nucifera]
Nn7g37815	--	--	Molecular Function: RNA binding (GO:0003723);;	--	--	--	--	--	--	--	--	RNA recognition motif domain [Macleaya cordata]
Nn1g04934	--	--	Molecular Function: molecular_function (GO:0003674);; Molecular Function: catalytic activity (GO:0003824);; Molecular Function: carbonate dehydratase activity (GO:0004089);; Cellular Component: cellular_component (GO:0005575);; Cellular Component: intracellular (GO:0005622);; Cellular Component: cell (GO:0005623);; Cellular Component: cytoplasm (GO:0005737);; Cellular Component: mitochondrion (GO…	K01726|8.7e-11|nnu:104601832|K01726 gamma-carbonic anhydrase [EC:4.2.1.-] | (RefSeq) gamma carbonic anhydrase 1, mitochondrial	--	--	--	--	Gamma carbonic anhydrase 1, mitochondrial OS=Arabidopsis thaliana OX=3702 GN=GAMMACA1 PE=1 SV=1	S	Function unknown	PREDICTED: gamma carbonic anhydrase 1, mitochondrial [Nelumbo nucifera]
Nn3g20948	--	--	Molecular Function: UDP-glycosyltransferase activity (GO:0008194);;	K13691|3.0e-60|mesc:110629740|K13691 pathogen-inducible salicylic acid glucosyltransferase [EC:2.4.1.-] | (RefSeq) UDP-glycosyltransferase 74G1-like	--	[GC]	Carbohydrate transport and metabolism;; Energy production and conversion	UDP-glucoronosyl and UDP-glucosyl transferase	UDP-glycosyltransferase 83A1 OS=Arabidopsis thaliana OX=3702 GN=UGT83A1 PE=2 SV=1	G	Carbohydrate transport and metabolism	PREDICTED: UDP-glycosyltransferase 83A1-like [Nelumbo nucifera]
Nn4g24155	--	--	--	--	--	--	--	--	--	--	--	PREDICTED: extensin [Nelumbo nucifera]
Nn5g27937	[O]	Posttranslational modification, protein turnover, chaperones	Molecular Function: adenyl-nucleotide exchange factor activity (GO:0000774);; Cellular Component: mitochondrial matrix (GO:0005759);; Biological Process: protein folding (GO:0006457);; Molecular Function: protein homodimerization activity (GO:0042803);; Molecular Function: chaperone binding (GO:0051087);;	K03687|1.6e-127|nnu:104588717|K03687 molecular chaperone GrpE | (RefSeq) protein GrpE	--	[O]	Posttranslational modification, protein turnover, chaperones	GrpE	--	O	Posttranslational modification, protein turnover, chaperones	PREDICTED: uncharacterized protein LOC104588717 isoform X1 [Nelumbo nucifera]
Nn6g31581	[R]	General function prediction only	Molecular Function: ADP binding (GO:0043531);;	K13457|1.1e-63|nnu:104607883|K13457 disease resistance protein RPM1 | (RefSeq) disease resistance protein RPM1-like	Plant-pathogen interaction (ko04626)	[T]	Signal transduction mechanisms	NB-ARC domain	Disease resistance RPP13-like protein 4 OS=Arabidopsis thaliana OX=3702 GN=RPP13L4 PE=1 SV=2	T	Signal transduction mechanisms	PREDICTED: disease resistance RPP13-like protein 4 [Nelumbo nucifera]
Nn4g23381	[M]	Cell wall/membrane/envelope biogenesis	Molecular Function: UDP-glucose 6-dehydrogenase activity (GO:0003979);; Molecular Function: NAD binding (GO:0051287);;	K00012|4.5e-268|nnu:104597981|K00012 UDPglucose 6-dehydrogenase [EC:1.1.1.22] | (RefSeq) UDP-glucose 6-dehydrogenase 1	Pentose and glucuronate interconversions (ko00040);; Ascorbate and aldarate metabolism (ko00053);; Amino sugar and nucleotide sugar metabolism (ko00520)	[GT]	Carbohydrate transport and metabolism;; Signal transduction mechanisms	UDP-glucose/GDP-mannose dehydrogenase family, NAD binding domain	UDP-glucose 6-dehydrogenase 5 OS=Oryza sativa subsp. japonica OX=39947 GN=UGD5 PE=2 SV=1	--	--	PREDICTED: UDP-glucose 6-dehydrogenase 1 [Nelumbo nucifera]
Nn1g01155	[O]	Posttranslational modification, protein turnover, chaperones	Molecular Function: serine-type endopeptidase activity (GO:0004252);;	K13199|2.0e-16|mtr:MTR_7g081660|K13199 plasminogen activator inhibitor 1 RNA-binding protein | (RefSeq) nuclear RNA-binding-like protein	--	--	--	Subtilase family	Subtilisin-like protease SBT1.3 OS=Arabidopsis thaliana OX=3702 GN=SBT1.3 PE=2 SV=1	G	Carbohydrate transport and metabolism	PREDICTED: subtilisin-like protease SBT1.3 [Nelumbo nucifera]
Nn5g28086	--	--	--	--	--	--	--	--	--	S	Function unknown	PREDICTED: uncharacterized protein At4g22758 [Nelumbo nucifera]
Nn2g10766	--	--	Cellular Component: ubiquitin ligase complex (GO:0000151);; Molecular Function: molecular_function (GO:0003674);; Molecular Function: binding (GO:0005488);; Molecular Function: protein binding (GO:0005515);; Cellular Component: cellular_component (GO:0005575);; Cellular Component: intracellular (GO:0005622);; Cellular Component: cell (GO:0005623);; Cellular Component: nucleus (GO:0005634);; Cellu…	--	--	[R]	General function prediction only	Kelch motif	F-box/kelch-repeat protein At5g60570 OS=Arabidopsis thaliana OX=3702 GN=At5g60570 PE=2 SV=1	S	Function unknown	PREDICTED: F-box/kelch-repeat protein At5g60570-like [Nelumbo nucifera]
Nn2g10341	--	--	Molecular Function: O-methyltransferase activity (GO:0008171);; Biological Process: methylation (GO:0032259);; Molecular Function: protein dimerization activity (GO:0046983);;	K03453|1.1e-18|nnu:104587986|K03453 bile acid:Na+ symporter, BASS family | (RefSeq) probable sodium/metabolite cotransporter BASS3, chloroplastic	--	[P]	Inorganic ion transport and metabolism	--	Probable sodium/metabolite cotransporter BASS3, chloroplastic OS=Arabidopsis thaliana OX=3702 GN=BASS3 PE=2 SV=1	D	Cell cycle control, cell division, chromosome partitioning	PREDICTED: caffeic acid 3-O-methyltransferase [Nelumbo nucifera]
Nn6g35049	--	--	Biological Process: ethylene-activated signaling pathway (GO:0009873);; Cellular Component: integral component of membrane (GO:0016021);; Molecular Function: metal ion transmembrane transporter activity (GO:0046873);;	K14513|3.2e-17|vvi:100256742|K14513 ethylene-insensitive protein 2 | (RefSeq) ethylene-insensitive protein 2	MAPK signaling pathway - plant (ko04016);; Plant hormone signal transduction (ko04075)	[P]	Inorganic ion transport and metabolism	--	Ethylene-insensitive protein 2 OS=Arabidopsis thaliana OX=3702 GN=EIN2 PE=1 SV=1	P	Inorganic ion transport and metabolism	PREDICTED: ethylene-insensitive protein 2-like [Nelumbo nucifera]
Nn4g23055	--	--	Molecular Function: endopeptidase inhibitor activity (GO:0004866);;	--	--	--	--	Trypsin and protease inhibitor	Miraculin OS=Synsepalum dulcificum OX=3743 PE=1 SV=3	--	--	PREDICTED: 21 kDa seed protein-like [Nelumbo nucifera]
Nn4g22789	--	--	--	--	--	--	--	Histidine phosphatase superfamily (branch 1)	--	S	Function unknown	PREDICTED: uncharacterized protein LOC104587197 [Nelumbo nucifera]
Nn2g11918	--	--	Molecular Function: zinc ion binding (GO:0008270);; Cellular Component: integral component of membrane (GO:0016021);;	--	--	--	--	--	--	A	RNA processing and modification	PREDICTED: uncharacterized protein LOC104595315 [Nelumbo nucifera]
Nn5g28640	--	--	Cellular Component: integral component of membrane (GO:0016021);;	--	--	[T]	Signal transduction mechanisms	Organic solute transporter Ostalpha	Protein LAZ1 homolog 1 OS=Arabidopsis thaliana OX=3702 GN=At1g77220 PE=2 SV=1	T	Signal transduction mechanisms	PREDICTED: protein LAZ1 homolog 1 [Nelumbo nucifera]
Nn5g26919	[N]	Cell motility	Cellular Component: integral component of membrane (GO:0016021);; Molecular Function: transferase activity (GO:0016740);;	K00729|6.4e-196|nnu:104593807|K00729 dolichyl-phosphate beta-glucosyltransferase [EC:2.4.1.117] | (RefSeq) dolichyl-phosphate beta-glucosyltransferase-like	N-Glycan biosynthesis (ko00510)	[R]	General function prediction only	Glycosyl transferase family 2	--	M	Cell wall/membrane/envelope biogenesis	PREDICTED: dolichyl-phosphate beta-glucosyltransferase-like isoform X1 [Nelumbo nucifera]
Nn3g16823	--	--	--	K06195|1.1e-24|gmx:100782176|K06195 ApaG protein | (RefSeq) uncharacterized protein LOC100782176 isoform X1	--	--	--	UvrB/uvrC motif	--	P	Inorganic ion transport and metabolism	PREDICTED: uncharacterized protein LOC104591415 [Nelumbo nucifera]
Nn8g39159	[IQR]	Lipid transport and metabolism;; Secondary metabolites biosynthesis, transport and catabolism;; General function prediction only	Cellular Component: integral component of membrane (GO:0016021);;	K13606|3.0e-299|nnu:104592199|K13606 chlorophyll(ide) b reductase [EC:1.1.1.294] | (RefSeq) probable chlorophyll(ide) b reductase NYC1, chloroplastic	Porphyrin and chlorophyll metabolism (ko00860)	[R]	General function prediction only	short chain dehydrogenase	Probable chlorophyll(ide) b reductase NYC1, chloroplastic OS=Oryza sativa subsp. japonica OX=39947 GN=NYC1 PE=1 SV=1	Q	Secondary metabolites biosynthesis, transport and catabolism	PREDICTED: probable chlorophyll(ide) b reductase NYC1, chloroplastic [Nelumbo nucifera]
Nn6g31574	[T]	Signal transduction mechanisms	Molecular Function: protein kinase activity (GO:0004672);; Molecular Function: ATP binding (GO:0005524);; Cellular Component: integral component of membrane (GO:0016021);; Molecular Function: carbohydrate binding (GO:0030246);;	K01176|6.2e-65|sbi:8065370|K01176 alpha-amylase [EC:3.2.1.1] | (RefSeq) alpha-amylase isozyme 2A	Starch and sucrose metabolism (ko00500)	--	--	Legume lectin domain	Probable L-type lectin-domain containing receptor kinase S.5 OS=Arabidopsis thaliana OX=3702 GN=LECRKS5 PE=2 SV=1	T	Signal transduction mechanisms	PREDICTED: probable L-type lectin-domain containing receptor kinase S.5 [Nelumbo nucifera]
Nn087s42774	--	--	--	--	--	--	--	--	--	--	--	uncharacterized protein LOC118033973 [Populus alba]
Nn237s45614	--	--	--	--	--	--	--	--	--	--	--	unnamed protein product [Prunus armeniaca]
Nn1g07494	[T]	Signal transduction mechanisms	Molecular Function: phosphorelay sensor kinase activity (GO:0000155);; Biological Process: regulation of transcription, DNA-templated (GO:0006355);; Biological Process: detection of visible light (GO:0009584);; Biological Process: red, far-red light phototransduction (GO:0009585);; Molecular Function: photoreceptor activity (GO:0009881);; Biological Process: protein-tetrapyrrole linkage (GO:00170…	K12121|0.0e+00|ppp:112293278|K12121 phytochrome B | (RefSeq) phytochrome 1-like isoform X1	Circadian rhythm - plant (ko04712)	--	--	Phytochrome region	Phytochrome C OS=Oryza sativa subsp. japonica OX=39947 GN=PHYC PE=2 SV=1	T	Signal transduction mechanisms	PREDICTED: phytochrome C-like [Nelumbo nucifera]
Nn1g08972	[U]	Intracellular trafficking, secretion, and vesicular transport	Molecular Function: ATP binding (GO:0005524);; Biological Process: protein targeting (GO:0006605);; Cellular Component: membrane (GO:0016020);; Biological Process: protein import (GO:0017038);;	K03070|0.0e+00|nnu:104605827|K03070 preprotein translocase subunit SecA [EC:7.4.2.8] | (RefSeq) protein translocase subunit SECA2, chloroplastic	Protein export (ko03060)	--	--	SecA DEAD-like domain	Protein translocase subunit SECA2, chloroplastic OS=Arabidopsis thaliana OX=3702 GN=SECA2 PE=1 SV=1	U	Intracellular trafficking, secretion, and vesicular transport	PREDICTED: protein translocase subunit SECA2, chloroplastic isoform X1 [Nelumbo nucifera]
Nn5g29411	--	--	Biological Process: nuclear-transcribed mRNA catabolic process, nonsense-mediated decay (GO:0000184);; Molecular Function: protein serine/threonine kinase activity (GO:0004674);; Molecular Function: ATP binding (GO:0005524);;	K08873|0.0e+00|nnu:104595829|K08873 serine/threonine-protein kinase SMG1 [EC:2.7.11.1] | (RefSeq) uncharacterized LOC104595829	mRNA surveillance pathway (ko03015)	[L]	Replication, recombination and repair	Phosphatidylinositol 3- and 4-kinase	Serine/threonine-protein kinase TOR OS=Oryza sativa subsp. japonica OX=39947 GN=TOR PE=1 SV=3	L	Replication, recombination and repair	PREDICTED: uncharacterized protein LOC104595829 isoform X1 [Nelumbo nucifera]
Nn058s41970	--	--	--	--	--	--	--	--	--	S	Function unknown	hypothetical protein CQW23_35335 [Capsicum baccatum]
Nn7g37795	--	--	--	--	--	--	--	--	--	S	Function unknown	uncharacterized protein LOC109794389, partial [Cajanus cajan]
Nn1g03606	--	--	Biological Process: xylem development (GO:0010089);;	--	--	--	--	--	Vascular-related unknown protein 1 OS=Arabidopsis thaliana OX=3702 GN=VUP1 PE=2 SV=1	--	--	PREDICTED: uncharacterized protein LOC104610871 isoform X1 [Nelumbo nucifera]
Nelumbo_nucifera_newGene_2569	--	--	Cellular Component: nucleus (GO:0005634);; Biological Process: regulation of transcription, DNA-templated (GO:0006355);; Molecular Function: zinc ion binding (GO:0008270);;	K17604|1.1e-306|nnu:104613158|K17604 zinc finger SWIM domain-containing protein 3 | (RefSeq) protein FAR1-RELATED SEQUENCE 5-like	--	--	--	MULE transposase domain	Protein FAR1-RELATED SEQUENCE 5 OS=Arabidopsis thaliana OX=3702 GN=FRS5 PE=1 SV=1	S	Function unknown	PREDICTED: protein FAR1-RELATED SEQUENCE 5-like isoform X1 [Nelumbo nucifera]
Nn5g30757	[T]	Signal transduction mechanisms	Molecular Function: phosphorelay sensor kinase activity (GO:0000155);; Cellular Component: integral component of membrane (GO:0016021);;	K19691|2.7e-50|ppp:112294252|K19691 osomolarity two-component system, sensor histidine kinase NIK1 [EC:2.7.13.3] | (RefSeq) uncharacterized protein LOC112294252	--	[T]	Signal transduction mechanisms	Response regulator receiver domain	Histidine kinase 1 OS=Arabidopsis thaliana OX=3702 GN=AHK1 PE=1 SV=2	T	Signal transduction mechanisms	PREDICTED: histidine kinase 1 [Nelumbo nucifera]
Nn245s45756	--	--	--	--	--	--	--	--	--	--	--	rRNA intron-encoded homing endonuclease [Gossypium australe]
Nn1g05624	--	--	--	K14765|1.9e-170|nnu:104611947|K14765 U3 small nucleolar ribonucleoprotein protein LCP5 | (RefSeq) neuroguidin	--	[A]	RNA processing and modification	Sas10/Utp3/C1D family	--	A	RNA processing and modification	PREDICTED: neuroguidin isoform X3 [Nelumbo nucifera]
Nn3g21622	[J]	Translation, ribosomal structure and biogenesis	Molecular Function: nucleic acid binding (GO:0003676);; Molecular Function: 3'-5' exonuclease activity (GO:0008408);;	K09122|9.6e-19|cme:CYME_CMD071C|K09122 uncharacterized protein | (RefSeq) unknown ribonuclease	--	[L]	Replication, recombination and repair	3'-5' exonuclease	--	L	Replication, recombination and repair	PREDICTED: uncharacterized protein LOC104598841 [Nelumbo nucifera]
Nelumbo_nucifera_newGene_2673	--	--	Molecular Function: nucleic acid binding (GO:0003676);; Molecular Function: RNA-DNA hybrid ribonuclease activity (GO:0004523);;	K01265|1.3e-12|nnu:104603035|K01265 methionyl aminopeptidase [EC:3.4.11.18] | (RefSeq) methionine aminopeptidase 1B, chloroplastic-like	--	[R]	General function prediction only	Reverse transcriptase-like	--	S	Function unknown	PREDICTED: uncharacterized protein LOC104609700, partial [Nelumbo nucifera]
Nn6g33562	--	--	Cellular Component: integral component of membrane (GO:0016021);;	K10664|4.7e-43|nnu:104604112|K10664 E3 ubiquitin-protein ligase ATL6/9/15/31/42/55 [EC:2.3.2.27] | (RefSeq) E3 ubiquitin-protein ligase ATL6-like	--	[O]	Posttranslational modification, protein turnover, chaperones	Ring finger domain	RING-H2 finger protein ATL29 OS=Arabidopsis thaliana OX=3702 GN=ATL29 PE=3 SV=1	O	Posttranslational modification, protein turnover, chaperones	PREDICTED: RING-H2 finger protein ATL29 [Nelumbo nucifera]
Nn8g39893	--	--	--	--	--	--	--	--	--	S	Function unknown	PREDICTED: uncharacterized protein LOC104610749 isoform X1 [Nelumbo nucifera]
Nn3g20857	--	--	Cellular Component: integral component of membrane (GO:0016021);;	--	--	--	--	--	--	S	Function unknown	uncharacterized protein LOC110867357 [Helianthus annuus]
Nn6g32449	--	--	--	K11982|1.1e-16|cmax:111483664|K11982 E3 ubiquitin-protein ligase RNF115/126 [EC:2.3.2.27] | (RefSeq) E3 ubiquitin-protein ligase SIRP1-like isoform X1	--	[O]	Posttranslational modification, protein turnover, chaperones	Ring finger domain	E3 ubiquitin-protein ligase RDUF1 OS=Arabidopsis thaliana OX=3702 GN=RDUF1 PE=1 SV=1	O	Posttranslational modification, protein turnover, chaperones	PREDICTED: RING-H2 finger protein ATL20-like [Nelumbo nucifera]
Nn078s42611	--	--	--	--	--	--	--	--	--	--	--	hypothetical protein CR513_24668, partial [Mucuna pruriens]
Nn3g17282	--	--	--	--	--	--	--	--	--	O	Posttranslational modification, protein turnover, chaperones	PREDICTED: uncharacterized protein LOC104602979 isoform X2 [Nelumbo nucifera]
Nn1g07612	[M]	Cell wall/membrane/envelope biogenesis	Molecular Function: protein serine/threonine kinase activity (GO:0004674);; Molecular Function: ATP binding (GO:0005524);; Cellular Component: integral component of membrane (GO:0016021);;	K13415|2.5e-187|nnu:104605494|K13415 protein brassinosteroid insensitive 1 [EC:2.7.10.1 2.7.11.1] | (RefSeq) systemin receptor SR160-like	Plant hormone signal transduction (ko04075)	--	--	Protein kinase domain	Receptor-like protein kinase BRI1-like 3 OS=Arabidopsis thaliana OX=3702 GN=BRL3 PE=1 SV=1	T	Signal transduction mechanisms	PREDICTED: receptor-like protein kinase BRI1-like 3 [Nelumbo nucifera]
Nn3g18897	[J]	Translation, ribosomal structure and biogenesis	Molecular Function: methyltransferase activity (GO:0008168);; Biological Process: methylation (GO:0032259);;	K05925|0.0e+00|nnu:104594082|K05925 mRNA m6A methyltransferase catalytic subunit [EC:2.1.1.348] | (RefSeq) N6-adenosine-methyltransferase MT-A70-like	--	[A]	RNA processing and modification	MT-A70	Probable N6-adenosine-methyltransferase MT-A70-like OS=Oryza sativa subsp. japonica OX=39947 GN=Os02g0672600 PE=2 SV=1	A	RNA processing and modification	PREDICTED: N6-adenosine-methyltransferase MT-A70-like [Nelumbo nucifera]
Nn4g25212	--	--	Cellular Component: cellular_component (GO:0005575);; Cellular Component: intracellular (GO:0005622);; Cellular Component: cell (GO:0005623);; Cellular Component: cytoplasm (GO:0005737);; Cellular Component: peroxisome (GO:0005777);; Biological Process: organelle organization (GO:0006996);; Biological Process: biological_process (GO:0008150);; Biological Process: plastid organization (GO:0009657)…	--	--	--	--	--	--	S	Function unknown	PREDICTED: QWRF motif-containing protein 2 [Nelumbo nucifera]
Nn8g40362	[M]	Cell wall/membrane/envelope biogenesis	Molecular Function: protein serine/threonine kinase activity (GO:0004674);; Molecular Function: ATP binding (GO:0005524);; Cellular Component: integral component of membrane (GO:0016021);;	K20718|2.4e-71|lsv:111893200|K20718 LRR receptor-like serine/threonine-protein kinase ERECTA [EC:2.7.11.1] | (RefSeq) LRR receptor-like serine/threonine-protein kinase ERECTA	MAPK signaling pathway - plant (ko04016)	--	--	Protein kinase domain	Receptor-like protein kinase OS=Ipomoea nil OX=35883 GN=INRPK1 PE=2 SV=2	T	Signal transduction mechanisms	PREDICTED: receptor-like protein kinase [Nelumbo nucifera]
Nelumbo_nucifera_newGene_60	--	--	Cellular Component: integral component of membrane (GO:0016021);; Molecular Function: kinase activity (GO:0016301);;	K17550|1.4e-27|qsu:111989606|K17550 protein phosphatase 1 regulatory subunit 7 | (RefSeq) probable LRR receptor-like serine/threonine-protein kinase At2g24230	--	[R]	General function prediction only	Leucine rich repeat N-terminal domain	Receptor-like protein 14 OS=Arabidopsis thaliana OX=3702 GN=RLP14 PE=3 SV=1	A	RNA processing and modification	PREDICTED: leucine-rich repeat receptor-like protein kinase PEPR1 [Nelumbo nucifera]
Nn5g29747	--	--	--	--	--	--	--	--	--	S	Function unknown	PREDICTED: L10-interacting MYB domain-containing protein-like isoform X2 [Nelumbo nucifera]
Nn1g06241	[J]	Translation, ribosomal structure and biogenesis	Molecular Function: nucleic acid binding (GO:0003676);; Molecular Function: asparagine-tRNA ligase activity (GO:0004816);; Molecular Function: ATP binding (GO:0005524);; Biological Process: asparaginyl-tRNA aminoacylation (GO:0006421);;	K01893|8.0e-223|nnu:104606762|K01893 asparaginyl-tRNA synthetase [EC:6.1.1.22] | (RefSeq) asparagine--tRNA ligase, cytoplasmic 1-like	Aminoacyl-tRNA biosynthesis (ko00970)	[J]	Translation, ribosomal structure and biogenesis	tRNA synthetases class II (D, K and N)	Asparagine--tRNA ligase, cytoplasmic 1 OS=Arabidopsis thaliana OX=3702 GN=SYNC1 PE=1 SV=1	J	Translation, ribosomal structure and biogenesis	PREDICTED: asparagine--tRNA ligase, cytoplasmic 1-like [Nelumbo nucifera]
Nn1g07217	--	--	Molecular Function: molecular_function (GO:0003674);; Molecular Function: nucleic acid binding (GO:0003676);; Molecular Function: RNA binding (GO:0003723);; Molecular Function: catalytic activity (GO:0003824);; Molecular Function: nuclease activity (GO:0004518);; Molecular Function: endonuclease activity (GO:0004519);; Molecular Function: binding (GO:0005488);; Cellular Component: cellular_compon…	K22262|1.0e-110|qsu:112034235|K22262 WD repeat and FYVE domain-containing protein 3 | (RefSeq) protein SPIRRIG	--	[R]	General function prediction only	PPR repeat family	Pentatricopeptide repeat-containing protein At4g04370 OS=Arabidopsis thaliana OX=3702 GN=PCMP-E99 PE=3 SV=1	S	Function unknown	PREDICTED: pentatricopeptide repeat-containing protein At4g04370 [Nelumbo nucifera]
Nn1g04547	--	--	--	K14014|4.8e-17|nnu:104608498|K14014 small VCP/p97-interacting protein | (RefSeq) uncharacterized LOC104608498	Protein processing in endoplasmic reticulum (ko04141)	--	--	Small VCP/p97-interacting protein	--	S	Function unknown	PREDICTED: uncharacterized protein LOC104609714 [Nelumbo nucifera]
Nn1g08853	--	--	Molecular Function: DNA binding (GO:0003677);; Biological Process: regulation of transcription from RNA polymerase II promoter (GO:0006357);; Molecular Function: protein dimerization activity (GO:0046983);;	--	--	--	--	Helix-loop-helix DNA-binding domain	--	K	Transcription	PREDICTED: transcription factor ORG2-like [Nelumbo nucifera]
Nn4g26331	--	--	Cellular Component: nucleus (GO:0005634);; Biological Process: negative regulation of transcription, DNA-templated (GO:0045892);;	--	--	--	--	Transcriptional repressor, ovate	Transcription repressor OFP11 OS=Arabidopsis thaliana OX=3702 GN=OFP11 PE=2 SV=1	S	Function unknown	PREDICTED: transcription repressor OFP11-like [Nelumbo nucifera]
Nn1g02867	--	--	Cellular Component: cellular_component (GO:0005575);; Cellular Component: cell wall (GO:0005618);; Cellular Component: cell (GO:0005623);; Cellular Component: external encapsulating structure (GO:0030312);; Cellular Component: cell part (GO:0044464);; Cellular Component: cell periphery (GO:0071944);;	--	--	--	--	--	KIN14B-interacting protein At4g14310 OS=Arabidopsis thaliana OX=3702 GN=At4g14310 PE=1 SV=1	S	Function unknown	PREDICTED: uncharacterized protein LOC104602833 [Nelumbo nucifera]
Nn4g26336	--	--	--	--	--	[G]	Carbohydrate transport and metabolism	Glyoxalase/Bleomycin resistance protein/Dioxygenase superfamily	--	G	Carbohydrate transport and metabolism	PREDICTED: uncharacterized protein LOC104611672 [Nelumbo nucifera]
Nn1g09709	--	--	Molecular Function: 1-phosphatidylinositol binding (GO:0005545);; Cellular Component: clathrin-coated vesicle (GO:0030136);; Molecular Function: clathrin binding (GO:0030276);; Biological Process: clathrin coat assembly (GO:0048268);;	--	--	[TU]	Signal transduction mechanisms;; Intracellular trafficking, secretion, and vesicular transport	--	Putative clathrin assembly protein At1g33340 OS=Arabidopsis thaliana OX=3702 GN=At1g33340 PE=1 SV=1	--	--	PREDICTED: putative clathrin assembly protein At1g33340 [Nelumbo nucifera]
Nn6g34634	[J]	Translation, ribosomal structure and biogenesis	Cellular Component: ribosome (GO:0005840);; Biological Process: ribosome biogenesis (GO:0042254);;	K02941|2.0e-147|nnu:104590633|K02941 large subunit ribosomal protein LP0 | (RefSeq) 60S acidic ribosomal protein P0-like	Ribosome (ko03010)	[J]	Translation, ribosomal structure and biogenesis	Insertion domain in 60S ribosomal protein L10P	60S acidic ribosomal protein P0 OS=Glycine max OX=3847 PE=2 SV=1	J	Translation, ribosomal structure and biogenesis	PREDICTED: 60S acidic ribosomal protein P0-like [Nelumbo nucifera]
Nn3g20704	--	--	--	--	--	--	--	Leucine Rich Repeat	--	S	Function unknown	PREDICTED: putative F-box/FBD/LRR-repeat protein At1g78760 [Nelumbo nucifera]
Nn3g20895	--	--	Biological Process: RNA processing (GO:0006396);;	K13217|0.0e+00|nnu:104590454|K13217 pre-mRNA-processing factor 39 | (RefSeq) uncharacterized LOC104590454	--	[A]	RNA processing and modification	Tetratricopeptide repeat	--	A	RNA processing and modification	PREDICTED: uncharacterized protein LOC104590454 isoform X1 [Nelumbo nucifera]
Nn3g17204	--	--	--	--	--	--	--	--	--	--	--	PREDICTED: uncharacterized protein LOC104597305 [Nelumbo nucifera]
Nn1g05277	[I]	Lipid transport and metabolism	Molecular Function: inositol-3-phosphate synthase activity (GO:0004512);; Biological Process: inositol biosynthetic process (GO:0006021);; Biological Process: phospholipid biosynthetic process (GO:0008654);;	K01858|1.6e-292|nnu:104605929|K01858 myo-inositol-1-phosphate synthase [EC:5.5.1.4] | (RefSeq) inositol-3-phosphate synthase-like	Inositol phosphate metabolism (ko00562)	[I]	Lipid transport and metabolism	Myo-inositol-1-phosphate synthase	Inositol-3-phosphate synthase OS=Sesamum indicum OX=4182 PE=2 SV=1	I	Lipid transport and metabolism	PREDICTED: inositol-3-phosphate synthase-like [Nelumbo nucifera]
Nn6g34274	--	--	Cellular Component: Golgi membrane (GO:0000139);; Biological Process: GPI anchor biosynthetic process (GO:0006506);; Cellular Component: integral component of membrane (GO:0016021);;	K23553|7.0e-209|nnu:104612688|K23553 post-GPI attachment to proteins factor 3 | (RefSeq) post-GPI attachment to proteins factor 3-like	--	[S]	Function unknown	Per1-like family	--	C	Energy production and conversion	PREDICTED: post-GPI attachment to proteins factor 3-like [Nelumbo nucifera]
Nn2g11862	--	--	--	--	--	--	--	--	--	--	--	PREDICTED: uncharacterized protein LOC104595278 isoform X1 [Nelumbo nucifera]
Nn1g04009	--	--	--	--	--	[D]	Cell cycle control, cell division, chromosome partitioning	--	Wings apart-like protein 1 OS=Arabidopsis thaliana OX=3702 GN=WAPL1 PE=2 SV=1	D	Cell cycle control, cell division, chromosome partitioning	PREDICTED: uncharacterized protein LOC104588878 [Nelumbo nucifera]
Nn5g31281	--	--	--	--	--	--	--	--	--	--	--	unnamed protein product [Prunus armeniaca]
Nn1g00553	[I]	Lipid transport and metabolism	Molecular Function: 3-hydroxyisobutyryl-CoA hydrolase activity (GO:0003860);;	K05605|1.7e-91|nnu:104610378|K05605 3-hydroxyisobutyryl-CoA hydrolase [EC:3.1.2.4] | (RefSeq) 3-hydroxyisobutyryl-CoA hydrolase 1-like	Valine, leucine and isoleucine degradation (ko00280);; beta-Alanine metabolism (ko00410);; Propanoate metabolism (ko00640);; Carbon metabolism (ko01200)	--	--	Enoyl-CoA hydratase/isomerase	3-hydroxyisobutyryl-CoA hydrolase 1 OS=Arabidopsis thaliana OX=3702 GN=CHY1 PE=1 SV=1	I	Lipid transport and metabolism	PREDICTED: 3-hydroxyisobutyryl-CoA hydrolase 1-like isoform X1 [Nelumbo nucifera]
Nn4g23134	--	--	Cellular Component: nucleus (GO:0005634);; Biological Process: regulation of transcription, DNA-templated (GO:0006355);; Molecular Function: sequence-specific DNA binding (GO:0043565);;	K09338|8.0e-10|nnu:104608635|K09338 homeobox-leucine zipper protein | (RefSeq) homeobox-leucine zipper protein ATHB-6-like	--	--	--	--	--	--	--	PREDICTED: homeobox-leucine zipper protein ATHB-6-like [Nelumbo nucifera]
Nn3g20245	--	--	Molecular Function: RNA binding (GO:0003723);; Molecular Function: metal ion binding (GO:0046872);;	K14404|0.0e+00|nnu:104585866|K14404 cleavage and polyadenylation specificity factor subunit 4 | (RefSeq) 30-kDa cleavage and polyadenylation specificity factor 30	mRNA surveillance pathway (ko03015)	[TA]	Signal transduction mechanisms;; RNA processing and modification	YT521-B-like domain	30-kDa cleavage and polyadenylation specificity factor 30 OS=Arabidopsis thaliana OX=3702 GN=CPSF30 PE=1 SV=1	--	--	PREDICTED: 30-kDa cleavage and polyadenylation specificity factor 30 [Nelumbo nucifera]
Nn1g02337	--	--	--	--	--	--	--	--	--	--	--	PREDICTED: uncharacterized protein LOC104596544 [Nelumbo nucifera]
Nn6g32621	--	--	--	--	--	--	--	--	--	--	--	hypothetical protein E2542_SST30253 [Spatholobus suberectus]
Nn4g26373	--	--	--	K19367|3.1e-11|nnu:104611396|K19367 maspardin | (RefSeq) maspardin	Endocytosis (ko04144)	--	--	--	--	S	Function unknown	PREDICTED: maspardin [Nelumbo nucifera]
Nn7g36297	--	--	Biological Process: cytoskeleton organization (GO:0007010);; Molecular Function: actin filament binding (GO:0051015);;	K05768|5.3e-253|cmax:111492524|K05768 gelsolin | (RefSeq) villin-4-like isoform X1	--	[Z]	Cytoskeleton	Gelsolin repeat	Villin-2 OS=Arabidopsis thaliana OX=3702 GN=VLN2 PE=1 SV=2	Z	Cytoskeleton	PREDICTED: villin-2-like [Nelumbo nucifera]
Nn2g13389	[H]	Coenzyme transport and metabolism	Molecular Function: hydrolase activity (GO:0016787);;	K07025|1.6e-171|nnu:104601051|K07025 putative hydrolase of the HAD superfamily | (RefSeq) uncharacterized LOC104601051	--	[R]	General function prediction only	Haloacid dehalogenase-like hydrolase	--	S	Function unknown	PREDICTED: uncharacterized protein LOC104601051 [Nelumbo nucifera]
Nn2g14575	--	--	Molecular Function: serine-type endopeptidase activity (GO:0004252);;	--	--	--	--	Subtilase family	Subtilisin-like protease SBT2.4 OS=Arabidopsis thaliana OX=3702 GN=SBT2.4 PE=1 SV=1	O	Posttranslational modification, protein turnover, chaperones	PREDICTED: subtilisin-like protease SBT2.3 [Nelumbo nucifera]
Nn2g11362	--	--	Cellular Component: integral component of membrane (GO:0016021);; Molecular Function: transmembrane transporter activity (GO:0022857);;	K08193|3.1e-78|nnu:104597009|K08193 MFS transporter, ACS family, solute carrier family 17 (sodium-dependent inorganic phosphate cotransporter), other | (RefSeq) probable anion transporter 3, chloroplastic	--	[G]	Carbohydrate transport and metabolism	--	Probable anion transporter 3, chloroplastic OS=Arabidopsis thaliana OX=3702 GN=ANTR3 PE=2 SV=2	G	Carbohydrate transport and metabolism	PREDICTED: probable anion transporter 3, chloroplastic [Nelumbo nucifera]
Nn7g37465	--	--	Cellular Component: cellular_component (GO:0005575);; Cellular Component: intracellular (GO:0005622);; Cellular Component: cell (GO:0005623);; Cellular Component: cytoplasm (GO:0005737);; Cellular Component: cytosol (GO:0005829);; Cellular Component: intracellular part (GO:0044424);; Cellular Component: cytoplasmic part (GO:0044444);; Cellular Component: cell part (GO:0044464);;	--	--	--	--	--	--	S	Function unknown	PREDICTED: uncharacterized protein At5g48480 [Nelumbo nucifera]
Nn3g20807	--	--	--	--	--	--	--	--	--	--	--	hypothetical protein LR48_Vigan05g084500 [Vigna angularis]
Nn5g30107	--	--	Molecular Function: methyltransferase activity (GO:0008168);; Biological Process: methylation (GO:0032259);; Molecular Function: protein heterodimerization activity (GO:0046982);;	K15448|7.4e-66|nnu:104604922|K15448 multifunctional methyltransferase subunit TRM112 | (RefSeq) multifunctional methyltransferase subunit TRM112-like protein At1g22270	--	[S]	Function unknown	Trm112p-like protein	Multifunctional methyltransferase subunit TRM112 homolog A OS=Arabidopsis thaliana OX=3702 GN=TRM112A PE=1 SV=1	S	Function unknown	PREDICTED: multifunctional methyltransferase subunit TRM112-like protein At1g22270 [Nelumbo nucifera]
Nn5g29753	[H]	Coenzyme transport and metabolism	Biological Process: protoporphyrinogen IX biosynthetic process (GO:0006782);; Molecular Function: glutamyl-tRNA reductase activity (GO:0008883);; Molecular Function: NADP binding (GO:0050661);;	K02492|1.3e-299|nnu:104595576|K02492 glutamyl-tRNA reductase [EC:1.2.1.70] | (RefSeq) glutamyl-tRNA reductase 1, chloroplastic-like	Porphyrin and chlorophyll metabolism (ko00860)	--	--	Shikimate / quinate 5-dehydrogenase	Glutamyl-tRNA reductase 1, chloroplastic OS=Cucumis sativus OX=3659 GN=HEMA1 PE=2 SV=1	H	Coenzyme transport and metabolism	PREDICTED: glutamyl-tRNA reductase 1, chloroplastic-like [Nelumbo nucifera]
Nn5g30656	--	--	--	--	--	[S]	Function unknown	Uncharacterized conserved protein (DUF2045)	--	G	Carbohydrate transport and metabolism	PREDICTED: uncharacterized protein KIAA0930 homolog isoform X1 [Nelumbo nucifera]
Nn5g29713	--	--	--	--	--	--	--	--	--	--	--	hypothetical protein PanWU01x14_003610 [Parasponia andersonii]
Nn3g21595	--	--	Molecular Function: SNAP receptor activity (GO:0005484);; Biological Process: intracellular protein transport (GO:0006886);; Cellular Component: integral component of membrane (GO:0016021);; Biological Process: vesicle-mediated transport (GO:0016192);;	K08489|9.3e-151|nnu:104598862|K08489 syntaxin 16 | (RefSeq) syntaxin-41-like	SNARE interactions in vesicular transport (ko04130)	[U]	Intracellular trafficking, secretion, and vesicular transport	SNARE domain	Syntaxin-41 OS=Arabidopsis thaliana OX=3702 GN=SYP41 PE=1 SV=1	--	--	PREDICTED: syntaxin-41-like [Nelumbo nucifera]
Nn8g39488	--	--	Biological Process: photosystem II repair (GO:0010206);;	--	--	--	--	--	Thylakoid lumenal 16.5 kDa protein, chloroplastic OS=Arabidopsis thaliana OX=3702 GN=At4g02530 PE=1 SV=3	S	Function unknown	PREDICTED: thylakoid lumenal 16.5 kDa protein, chloroplastic [Nelumbo nucifera]
Nn1g07995	--	--	Molecular Function: DNA binding (GO:0003677);; Molecular Function: protein dimerization activity (GO:0046983);;	K01230|3.2e-15|vvi:100242837|K01230 mannosyl-oligosaccharide alpha-1,2-mannosidase [EC:3.2.1.113] | (RefSeq) mannosyl-oligosaccharide 1,2-alpha-mannosidase MNS1	N-Glycan biosynthesis (ko00510);; Various types of N-glycan biosynthesis (ko00513);; Protein processing in endoplasmic reticulum (ko04141)	--	--	hAT family C-terminal dimerisation region	--	--	--	PREDICTED: uncharacterized protein LOC104610093 [Nelumbo nucifera]
Nn4g23099	[O]	Posttranslational modification, protein turnover, chaperones	Molecular Function: peptidyl-prolyl cis-trans isomerase activity (GO:0003755);;	K12733|4.1e-13|ota:OT_ostta03g03340|K12733 peptidyl-prolyl cis-trans isomerase-like 1 [EC:5.2.1.8] | (RefSeq) Cyclophilin-type peptidyl-prolyl cis-trans isomerase, conserved site	Spliceosome (ko03040)	[O]	Posttranslational modification, protein turnover, chaperones	Cyclophilin type peptidyl-prolyl cis-trans isomerase/CLD	Peptidyl-prolyl cis-trans isomerase CYP23 OS=Arabidopsis thaliana OX=3702 GN=CYP23 PE=2 SV=1	O	Posttranslational modification, protein turnover, chaperones	PREDICTED: peptidyl-prolyl cis-trans isomerase CYP23 [Nelumbo nucifera]
Nn201s44935	--	--	--	--	--	--	--	--	--	--	--	unnamed protein product [Prunus armeniaca]
Nn2g12610	[ET]	Amino acid transport and metabolism;; Signal transduction mechanisms	Molecular Function: ligand-gated ion channel activity (GO:0015276);; Cellular Component: integral component of membrane (GO:0016021);;	K05387|0.0e+00|nnu:104599081|K05387 glutamate receptor, ionotropic, plant | (RefSeq) glutamate receptor 2.8-like	--	[PET]	Inorganic ion transport and metabolism;; Amino acid transport and metabolism;; Signal transduction mechanisms	Receptor family ligand binding region	Glutamate receptor 2.8 OS=Arabidopsis thaliana OX=3702 GN=GLR2.8 PE=2 SV=2	P	Inorganic ion transport and metabolism	PREDICTED: glutamate receptor 2.8-like [Nelumbo nucifera]
Nn8g39514	--	--	Molecular Function: DNA binding (GO:0003677);; Cellular Component: nucleus (GO:0005634);;	K09422|6.2e-123|nnu:104592480|K09422 transcription factor MYB, plant | (RefSeq) transcription factor MYB114-like	--	[K]	Transcription	Myb-like DNA-binding domain	Transcription factor MYB82 OS=Arabidopsis thaliana OX=3702 GN=MYB82 PE=1 SV=1	--	--	PREDICTED: transcription factor MYB114-like [Nelumbo nucifera]
Nn7g37745	--	--	--	K19619|2.5e-07|hbr:110670593|K19619 tyrosyl-DNA phosphodiesterase 2 [EC:3.1.4.-] | (RefSeq) uncharacterized protein LOC110670593	--	--	--	--	--	L	Replication, recombination and repair	PREDICTED: uncharacterized protein LOC104605328 [Nelumbo nucifera]
Nn8g38518	[O]	Posttranslational modification, protein turnover, chaperones	Molecular Function: ATP binding (GO:0005524);;	K03283|2.5e-87|nnu:104609134|K03283 heat shock 70kDa protein 1/2/6/8 | (RefSeq) heat shock 70 kDa protein	Spliceosome (ko03040);; Protein processing in endoplasmic reticulum (ko04141);; Endocytosis (ko04144)	[O]	Posttranslational modification, protein turnover, chaperones	Hsp70 protein	Heat shock cognate 70 kDa protein OS=Petunia hybrida OX=4102 GN=HSP70 PE=2 SV=1	O	Posttranslational modification, protein turnover, chaperones	PREDICTED: heat shock 70 kDa protein [Nelumbo nucifera]
Nn3g18984	--	--	Biological Process: ubiquitin-dependent protein catabolic process (GO:0006511);; Biological Process: multicellular organism development (GO:0007275);; Molecular Function: zinc ion binding (GO:0008270);; Cellular Component: host cell nucleus (GO:0042025);;	K04506|4.4e-30|nnu:104604027|K04506 E3 ubiquitin-protein ligase SIAH1 [EC:2.3.2.27] | (RefSeq) E3 ubiquitin-protein ligase SINAT5	Ubiquitin mediated proteolysis (ko04120)	[R]	General function prediction only	--	E3 ubiquitin-protein ligase SINAT5 OS=Arabidopsis thaliana OX=3702 GN=SINAT5 PE=1 SV=2	O	Posttranslational modification, protein turnover, chaperones	PREDICTED: E3 ubiquitin-protein ligase SINAT5 isoform X2 [Nelumbo nucifera]
Nn1g01316	[E]	Amino acid transport and metabolism	Molecular Function: catalytic activity (GO:0003824);;	K15631|1.2e-34|ppp:112292332|K15631 molybdenum cofactor sulfurtransferase [EC:2.8.1.9] | (RefSeq) molybdenum cofactor sulfurase-like isoform X1	Folate biosynthesis (ko00790)	[H]	Coenzyme transport and metabolism	--	Molybdenum cofactor sulfurase OS=Solanum lycopersicum OX=4081 GN=FLACCA PE=2 SV=1	H	Coenzyme transport and metabolism	PREDICTED: uncharacterized protein LOC104596201 [Nelumbo nucifera]
Nn1g08865	--	--	--	--	--	--	--	--	--	--	--	PREDICTED: uncharacterized protein LOC104605782 [Nelumbo nucifera]
Nelumbo_nucifera_newGene_1999	--	--	--	--	--	--	--	--	--	S	Function unknown	TPA: polyprotein [Oryza sativa Japonica Group]
Nn1g01247	[O]	Posttranslational modification, protein turnover, chaperones	Cellular Component: cellular_component (GO:0005575);; Cellular Component: intracellular (GO:0005622);; Cellular Component: cell (GO:0005623);; Cellular Component: cytoplasm (GO:0005737);; Cellular Component: vacuole (GO:0005773);; Cellular Component: vacuolar membrane (GO:0005774);; Cellular Component: Golgi apparatus (GO:0005794);; Cellular Component: plasma membrane (GO:0005886);; Cellular Comp…	--	--	[C]	Energy production and conversion	SPFH domain / Band 7 family	Hypersensitive-induced response protein 4 OS=Arabidopsis thaliana OX=3702 GN=HIR4 PE=1 SV=1	C	Energy production and conversion	PREDICTED: hypersensitive-induced response protein 4-like [Nelumbo nucifera]
Nn4g24334	--	--	Molecular Function: ADP binding (GO:0043531);;	--	--	--	--	Rx N-terminal domain	--	T	Signal transduction mechanisms	PREDICTED: disease resistance protein RGA2-like [Nelumbo nucifera]
Nn3g21864	--	--	--	--	--	[S]	Function unknown	Bucentaur or craniofacial development	--	K	Transcription	PREDICTED: craniofacial development protein 1 [Nelumbo nucifera]
Nn3g17199	--	--	--	--	--	--	--	rRNA processing/ribosome biogenesis	--	S	Function unknown	PREDICTED: proline-, glutamic acid- and leucine-rich protein 1-like isoform X1 [Nelumbo nucifera]
Nn3g17122	--	--	Cellular Component: integral component of membrane (GO:0016021);; Molecular Function: transmembrane transporter activity (GO:0022857);;	K14638|3.0e-191|cit:102607539|K14638 solute carrier family 15 (peptide/histidine transporter), member 3/4 | (RefSeq) protein NRT1/ PTR FAMILY 4.6 isoform X1	--	[E]	Amino acid transport and metabolism	POT family	Protein NRT1/ PTR FAMILY 4.6 OS=Arabidopsis thaliana OX=3702 GN=NPF4.6 PE=1 SV=1	E	Amino acid transport and metabolism	PREDICTED: protein NRT1/ PTR FAMILY 4.6 isoform X2 [Nelumbo nucifera]
Nn1g03912	--	--	Cellular Component: photosystem I (GO:0009522);; Cellular Component: photosystem II (GO:0009523);; Cellular Component: chloroplast thylakoid membrane (GO:0009535);; Biological Process: photosynthesis, light harvesting (GO:0009765);; Cellular Component: integral component of membrane (GO:0016021);; Molecular Function: chlorophyll binding (GO:0016168);; Biological Process: protein-chromophore linka…	K08914|4.0e-119|nnu:104612608|K08914 light-harvesting complex II chlorophyll a/b binding protein 3 | (RefSeq) chlorophyll a-b binding protein 13, chloroplastic-like	Photosynthesis - antenna proteins (ko00196)	--	--	Chlorophyll A-B binding protein	Chlorophyll a-b binding protein 13, chloroplastic OS=Solanum lycopersicum OX=4081 GN=CAB13 PE=1 SV=1	C	Energy production and conversion	PREDICTED: chlorophyll a-b binding protein 13, chloroplastic-like [Nelumbo nucifera]
Nn4g23013	--	--	Biological Process: cytokinin metabolic process (GO:0009690);; Molecular Function: cytokinin dehydrogenase activity (GO:0019139);; Molecular Function: FAD binding (GO:0071949);;	K00279|1.2e-14|nnu:104600585|K00279 cytokinin dehydrogenase [EC:1.5.99.12] | (RefSeq) cytokinin dehydrogenase 7	Zeatin biosynthesis (ko00908)	--	--	--	--	C	Energy production and conversion	PREDICTED: cytokinin dehydrogenase 7 [Nelumbo nucifera]
Nn5g30387	[O]	Posttranslational modification, protein turnover, chaperones	Molecular Function: cysteine-type peptidase activity (GO:0008234);;	K16290|2.4e-86|smo:SELMODRAFT_184826|K16290 xylem cysteine proteinase [EC:3.4.22.-] | (RefSeq) hypothetical protein	--	[O]	Posttranslational modification, protein turnover, chaperones	Papain family cysteine protease	Probable cysteine protease RD21B OS=Arabidopsis thaliana OX=3702 GN=RD21B PE=1 SV=1	O	Posttranslational modification, protein turnover, chaperones	PREDICTED: cysteine proteinase RD21A-like [Nelumbo nucifera]
Nn1g09652	[L]	Replication, recombination and repair	Molecular Function: endonuclease activity (GO:0004519);; Molecular Function: ATP binding (GO:0005524);; Biological Process: mismatch repair (GO:0006298);; Molecular Function: ATPase activity (GO:0016887);; Molecular Function: mismatched DNA binding (GO:0030983);; Biological Process: negative regulation of DNA recombination (GO:0045910);;	K07456|9.8e-62|csv:101208249|K07456 DNA mismatch repair protein MutS2 | (RefSeq) uncharacterized protein LOC101208249 isoform X1	Mismatch repair (ko03430)	--	--	MutS domain V	DNA mismatch repair protein MSH1, mitochondrial OS=Arabidopsis thaliana OX=3702 GN=MSH1 PE=1 SV=1	L	Replication, recombination and repair	PREDICTED: uncharacterized protein LOC104605235 isoform X1 [Nelumbo nucifera]
Nn151s44155	--	--	--	--	--	--	--	--	--	--	--	hypothetical protein GLYMA_13G011700 [Glycine max]
Nn2g13064	--	--	Molecular Function: SNAP receptor activity (GO:0005484);; Biological Process: intracellular protein transport (GO:0006886);; Cellular Component: integral component of membrane (GO:0016021);;	K08506|1.2e-87|nnu:104602649|K08506 syntaxin of plants SYP7 | (RefSeq) syntaxin-71-like	SNARE interactions in vesicular transport (ko04130)	--	--	--	Syntaxin-71 OS=Arabidopsis thaliana OX=3702 GN=SYP71 PE=1 SV=1	U	Intracellular trafficking, secretion, and vesicular transport	PREDICTED: syntaxin-71-like [Nelumbo nucifera]
Nn1g02925	--	--	Molecular Function: protein binding (GO:0005515);;	--	--	--	--	Leucine rich repeat	--	T	Signal transduction mechanisms	--
Nelumbo_nucifera_newGene_2731	--	--	Molecular Function: nucleic acid binding (GO:0003676);;	K15718|2.0e-07|oeu:111368968|K15718 linoleate 9S-lipoxygenase [EC:1.13.11.58] | (RefSeq) probable linoleate 9S-lipoxygenase 5	Linoleic acid metabolism (ko00591)	[R]	General function prediction only	--	--	J	Translation, ribosomal structure and biogenesis	PREDICTED: uncharacterized protein LOC104591012, partial [Nelumbo nucifera]
Nn2g11114	--	--	--	--	--	--	--	PDDEXK-like family of unknown function	--	S	Function unknown	PREDICTED: uncharacterized protein LOC104597192 [Nelumbo nucifera]
Nn2g11806	--	--	--	--	--	--	--	CASC3/Barentsz eIF4AIII binding	Protein MLN51 homolog OS=Arabidopsis thaliana OX=3702 GN=MLN51 PE=1 SV=1	S	Function unknown	PREDICTED: histone H3.v1-like isoform X1 [Nelumbo nucifera]
Nn7g35795	--	--	Cellular Component: mitochondrial respiratory chain complex III (GO:0005750);; Biological Process: mitochondrial electron transport, ubiquinol to cytochrome c (GO:0006122);;	K00417|6.9e-07|nnu:104592346|K00417 ubiquinol-cytochrome c reductase subunit 7 | (RefSeq) cytochrome b-c1 complex subunit 7-2-like	Oxidative phosphorylation (ko00190)	[C]	Energy production and conversion	--	Cytochrome b-c1 complex subunit 7-2, mitochondrial OS=Arabidopsis thaliana OX=3702 GN=QCR7-2 PE=1 SV=1	--	--	--
Nn6g34794	--	--	--	--	--	--	--	--	Uncharacterized protein At5g41620 OS=Arabidopsis thaliana OX=3702 GN=At5g41620 PE=2 SV=2	--	--	PREDICTED: uncharacterized protein At5g41620 [Nelumbo nucifera]
Nn1g05611	--	--	Molecular Function: UDP-glycosyltransferase activity (GO:0008194);; Cellular Component: integral component of membrane (GO:0016021);;	K18823|3.4e-94|aip:107622299|K18823 soyasaponin III rhamnosyltransferase [EC:2.4.1.273] | (RefSeq) soyasaponin III rhamnosyltransferase	--	[GC]	Carbohydrate transport and metabolism;; Energy production and conversion	UDP-glucoronosyl and UDP-glucosyl transferase	Putative UDP-rhamnose:rhamnosyltransferase 1 OS=Fragaria ananassa OX=3747 GN=GT4 PE=2 SV=1	--	--	PREDICTED: UDP-glycosyltransferase 91C1-like [Nelumbo nucifera]
Nn3g18681	--	--	Biological Process: endosomal transport (GO:0016197);;	K19022|0.0e+00|nnu:104592558|K19022 AP-5 complex subunit beta-1 | (RefSeq) uncharacterized LOC104592558	--	--	--	--	--	S	Function unknown	PREDICTED: uncharacterized protein LOC104592558 [Nelumbo nucifera]
Nn8g38743	--	--	Cellular Component: integral component of membrane (GO:0016021);;	K15121|4.6e-155|nnu:104600624|K15121 solute carrier family 25, member 44 | (RefSeq) solute carrier family 25 member 44-like	--	[C]	Energy production and conversion	Mitochondrial carrier protein	Mitochondrial carnitine/acylcarnitine carrier-like protein OS=Arabidopsis thaliana OX=3702 GN=BOU PE=1 SV=1	C	Energy production and conversion	PREDICTED: solute carrier family 25 member 44-like, partial [Nelumbo nucifera]
Nn6g35206	--	--	Molecular Function: NADPH-hemoprotein reductase activity (GO:0003958);; Cellular Component: endoplasmic reticulum membrane (GO:0005789);; Molecular Function: FMN binding (GO:0010181);; Cellular Component: integral component of membrane (GO:0016021);; Molecular Function: flavin adenine dinucleotide binding (GO:0050660);; Molecular Function: NADP binding (GO:0050661);;	K00327|6.4e-59|nnu:104603173|K00327 NADPH-ferrihemoprotein reductase [EC:1.6.2.4] | (RefSeq) NADPH--cytochrome P450 reductase-like	--	[C]	Energy production and conversion	--	NADPH--cytochrome P450 reductase OS=Catharanthus roseus OX=4058 GN=CPR PE=2 SV=1	C	Energy production and conversion	PREDICTED: NADPH--cytochrome P450 reductase-like [Nelumbo nucifera]
Nn4g23943	[E]	Amino acid transport and metabolism	Biological Process: glutamine metabolic process (GO:0006541);; Molecular Function: transferase activity (GO:0016740);; Molecular Function: hydrolase activity (GO:0016787);;	--	--	--	--	Peptidase C26	Putative glutamine amidotransferase GAT1_2.1 OS=Arabidopsis thaliana OX=3702 GN=GAT1_2.1 PE=2 SV=1	F	Nucleotide transport and metabolism	PREDICTED: putative glutamine amidotransferase PB2B2.05 [Nelumbo nucifera]
Nn5g31385	--	--	--	--	--	--	--	--	--	--	--	unnamed protein product [Prunus armeniaca]
Nn3g20789	--	--	Biological Process: response to stress (GO:0006950);; Biological Process: response to oxidative stress (GO:0006979);; Biological Process: biological_process (GO:0008150);; Biological Process: response to stimulus (GO:0050896);;	--	--	--	--	VQ motif	--	S	Function unknown	PREDICTED: VQ motif-containing protein 10-like [Nelumbo nucifera]
Nn1g09348	--	--	--	--	--	--	--	--	--	--	--	PREDICTED: glycine-rich protein A3-like [Nelumbo nucifera]
Nn5g31099	--	--	Cellular Component: integral component of membrane (GO:0016021);;	K13354|1.6e-36|nnu:104603859|K13354 solute carrier family 25 (peroxisomal adenine nucleotide transporter), member 17 | (RefSeq) peroxisomal nicotinamide adenine dinucleotide carrier-like	Peroxisome (ko04146)	[C]	Energy production and conversion	Mitochondrial carrier protein	Peroxisomal nicotinamide adenine dinucleotide carrier OS=Arabidopsis thaliana OX=3702 GN=PXN PE=1 SV=1	C	Energy production and conversion	PREDICTED: peroxisomal nicotinamide adenine dinucleotide carrier-like isoform X2 [Nelumbo nucifera]
Nn7g37266	--	--	Cellular Component: integral component of plasma membrane (GO:0005887);; Biological Process: protein secretion (GO:0009306);;	--	--	--	--	--	--	--	--	PREDICTED: uncharacterized protein LOC104595255 isoform X1 [Nelumbo nucifera]
Nn5g28437	--	--	Cellular Component: Golgi membrane (GO:0000139);; Cellular Component: endoplasmic reticulum membrane (GO:0005789);; Biological Process: intracellular protein transport (GO:0006886);; Molecular Function: zinc ion binding (GO:0008270);; Cellular Component: COPII vesicle coat (GO:0030127);; Biological Process: COPII-coated vesicle budding (GO:0090114);;	K14006|0.0e+00|nnu:104606673|K14006 protein transport protein SEC23 | (RefSeq) protein transport protein SEC23-like	Protein processing in endoplasmic reticulum (ko04141)	[U]	Intracellular trafficking, secretion, and vesicular transport	Sec23/Sec24 trunk domain	--	U	Intracellular trafficking, secretion, and vesicular transport	PREDICTED: protein transport protein SEC23-like [Nelumbo nucifera]
Nn119s43462	--	--	--	--	--	--	--	--	--	--	--	hypothetical protein CQW23_34295 [Capsicum baccatum]
Nn125s43610	--	--	--	--	--	--	--	--	--	--	--	unnamed protein product [Prunus armeniaca]
Nn5g28445	--	--	Molecular Function: oxidoreductase activity, acting on NAD(P)H, quinone or similar compound as acceptor (GO:0016655);;	--	--	--	--	Cyanobacterial and plastid NDH-1 subunit M	NAD(P)H-quinone oxidoreductase subunit M, chloroplastic OS=Vitis vinifera OX=29760 GN=ndhM PE=2 SV=1	S	Function unknown	PREDICTED: NAD(P)H-quinone oxidoreductase subunit M, chloroplastic [Nelumbo nucifera]
Nn3g17404	[M]	Cell wall/membrane/envelope biogenesis	Molecular Function: UDP-glucose 6-dehydrogenase activity (GO:0003979);; Molecular Function: NAD binding (GO:0051287);;	K00012|2.1e-236|nnu:104598784|K00012 UDPglucose 6-dehydrogenase [EC:1.1.1.22] | (RefSeq) UDP-glucose 6-dehydrogenase 1-like	Pentose and glucuronate interconversions (ko00040);; Ascorbate and aldarate metabolism (ko00053);; Amino sugar and nucleotide sugar metabolism (ko00520)	[GT]	Carbohydrate transport and metabolism;; Signal transduction mechanisms	UDP-glucose/GDP-mannose dehydrogenase family, NAD binding domain	UDP-glucose 6-dehydrogenase 5 OS=Oryza sativa subsp. japonica OX=39947 GN=UGD5 PE=2 SV=1	--	--	PREDICTED: UDP-glucose 6-dehydrogenase 1-like [Nelumbo nucifera]
Nn5g28547	--	--	Molecular Function: nucleic acid binding (GO:0003676);;	K14570|3.3e-239|nnu:104606737|K14570 RNA exonuclease 1 [EC:3.1.-.-] | (RefSeq) small RNA degrading nuclease 5	Ribosome biogenesis in eukaryotes (ko03008)	[L]	Replication, recombination and repair	Exonuclease	Small RNA degrading nuclease 5 OS=Arabidopsis thaliana OX=3702 GN=SDN5 PE=2 SV=2	L	Replication, recombination and repair	PREDICTED: small RNA degrading nuclease 5 isoform X2 [Nelumbo nucifera]
Nn1g03540	--	--	--	--	--	--	--	--	--	S	Function unknown	PREDICTED: uncharacterized protein LOC104610918 [Nelumbo nucifera]
Nn1g08965	[Q]	Secondary metabolites biosynthesis, transport and catabolism	Molecular Function: oxidoreductase activity (GO:0016491);; Molecular Function: metal ion binding (GO:0046872);;	K05933|2.8e-182|nnu:104605834|K05933 aminocyclopropanecarboxylate oxidase [EC:1.14.17.4] | (RefSeq) 1-aminocyclopropane-1-carboxylate oxidase 5	Cysteine and methionine metabolism (ko00270)	[QR]	Secondary metabolites biosynthesis, transport and catabolism;; General function prediction only	2OG-Fe(II) oxygenase superfamily	1-aminocyclopropane-1-carboxylate oxidase 5 OS=Arabidopsis thaliana OX=3702 GN=At1g77330 PE=2 SV=1	Q	Secondary metabolites biosynthesis, transport and catabolism	PREDICTED: 1-aminocyclopropane-1-carboxylate oxidase 5 [Nelumbo nucifera]
Nn6g33489	--	--	Cellular Component: integral component of membrane (GO:0016021);; Molecular Function: transferase activity (GO:0016740);;	--	--	[R]	General function prediction only	Glycosyl transferase family 90	--	S	Function unknown	PREDICTED: O-glucosyltransferase rumi-like [Nelumbo nucifera]
Nn5g29824	[C]	Energy production and conversion	Molecular Function: methylmalonate-semialdehyde dehydrogenase (acylating) activity (GO:0004491);;	K00140|7.0e-44|nnu:104611960|K00140 malonate-semialdehyde dehydrogenase (acetylating) / methylmalonate-semialdehyde dehydrogenase [EC:1.2.1.18 1.2.1.27] | (RefSeq) methylmalonate-semialdehyde dehydrogenase [acylating], mitochondrial-like	Valine, leucine and isoleucine degradation (ko00280);; beta-Alanine metabolism (ko00410);; Inositol phosphate metabolism (ko00562);; Propanoate metabolism (ko00640);; Carbon metabolism (ko01200)	[EG]	Amino acid transport and metabolism;; Carbohydrate transport and metabolism	Aldehyde dehydrogenase family	Methylmalonate-semialdehyde dehydrogenase [acylating], mitochondrial OS=Arabidopsis thaliana OX=3702 GN=ALDH6B2 PE=1 SV=2	--	--	PREDICTED: methylmalonate-semialdehyde dehydrogenase [acylating], mitochondrial-like isoform X3 [Nelumbo nucifera]
Nelumbo_nucifera_newGene_1043	--	--	Molecular Function: DNA binding (GO:0003677);; Cellular Component: nucleus (GO:0005634);; Cellular Component: host cell nucleus (GO:0042025);; Molecular Function: metal ion binding (GO:0046872);;	K22768|1.0e-54|nnu:104607891|K22768 methyl-CpG-binding domain-containing protein 9 [EC:2.3.1.48] | (RefSeq) methyl-CpG-binding domain-containing protein 9-like	--	--	--	--	--	S	Function unknown	PREDICTED: methyl-CpG-binding domain-containing protein 9-like [Nelumbo nucifera]
Nn2g12789	[O]	Posttranslational modification, protein turnover, chaperones	Cellular Component: integral component of membrane (GO:0016021);;	--	--	--	--	Methyltransferase FkbM domain	--	S	Function unknown	PREDICTED: uncharacterized protein LOC104599202 [Nelumbo nucifera]
Nn2g15331	--	--	Biological Process: defense response (GO:0006952);; Molecular Function: ADP binding (GO:0043531);;	--	--	--	--	Leucine rich repeat	--	T	Signal transduction mechanisms	PREDICTED: putative disease resistance protein RGA4 [Nelumbo nucifera]
Nn5g27739	--	--	Biological Process: mRNA splicing, via spliceosome (GO:0000398);;	K11984|0.0e+00|nnu:104596774|K11984 U4/U6.U5 tri-snRNP-associated protein 1 | (RefSeq) SART-1 family protein DOT2	Spliceosome (ko03040)	[A]	RNA processing and modification	SART-1 family	SART-1 family protein DOT2 OS=Arabidopsis thaliana OX=3702 GN=DOT2 PE=1 SV=1	A	RNA processing and modification	PREDICTED: SART-1 family protein DOT2 [Nelumbo nucifera]
Nn4g26452	--	--	Cellular Component: intracellular membrane-bounded organelle (GO:0043231);; Molecular Function: 2 iron, 2 sulfur cluster binding (GO:0051537);;	K23882|5.6e-46|nnu:104610865|K23882 CDGSH iron-sulfur domain-containing protein 2 | (RefSeq) CDGSH iron-sulfur domain-containing protein NEET	--	[R]	General function prediction only	--	CDGSH iron-sulfur domain-containing protein NEET OS=Arabidopsis thaliana OX=3702 GN=NEET PE=1 SV=1	S	Function unknown	PREDICTED: CDGSH iron-sulfur domain-containing protein NEET [Nelumbo nucifera]
Nn3g21627	--	--	--	--	--	--	--	Cotton fibre expressed protein	--	S	Function unknown	PREDICTED: uncharacterized protein LOC104598838 [Nelumbo nucifera]
Nn8g39416	--	--	Molecular Function: nucleic acid binding (GO:0003676);; Molecular Function: zinc ion binding (GO:0008270);; Biological Process: DNA integration (GO:0015074);;	K03006|3.2e-189|adu:107466525|K03006 DNA-directed RNA polymerase II subunit RPB1 [EC:2.7.7.6] | (RefSeq) LOW QUALITY PROTEIN: DNA-directed RNA polymerase II subunit 1-like	RNA polymerase (ko03020)	[R]	General function prediction only	Reverse transcriptase (RNA-dependent DNA polymerase)	Retrovirus-related Pol polyprotein from transposon TNT 1-94 OS=Nicotiana tabacum OX=4097 PE=2 SV=1	L	Replication, recombination and repair	Integrase, catalytic core [Cinnamomum micranthum f. kanehirae]
Nelumbo_nucifera_newGene_2145	--	--	Cellular Component: integral component of membrane (GO:0016021);;	--	--	--	--	--	--	--	--	--
Nn3g17425	--	--	Cellular Component: integral component of membrane (GO:0016021);; Molecular Function: transmembrane transporter activity (GO:0022857);;	K15283|1.0e-235|nnu:104598928|K15283 solute carrier family 35, member E1 | (RefSeq) triose phosphate/phosphate translocator, chloroplastic-like	--	[GE]	Carbohydrate transport and metabolism;; Amino acid transport and metabolism	Triose-phosphate Transporter family	Triose phosphate/phosphate translocator, chloroplastic OS=Spinacia oleracea OX=3562 PE=1 SV=1	--	--	PREDICTED: triose phosphate/phosphate translocator, chloroplastic-like isoform X2 [Nelumbo nucifera]
Nn5g31202	--	--	--	--	--	--	--	--	--	--	--	predicted protein [Micromonas pusilla CCMP1545]
Nn2g12746	--	--	--	--	--	--	--	Protein of unknown function (DUF632)	Protein ALTERED PHOSPHATE STARVATION RESPONSE 1 OS=Arabidopsis thaliana OX=3702 GN=APSR1 PE=2 SV=1	S	Function unknown	PREDICTED: uncharacterized protein LOC104599165 [Nelumbo nucifera]
Nn8g38949	--	--	Biological Process: positive regulation of DNA repair (GO:0045739);; Cellular Component: BRCA1-A complex (GO:0070531);; Cellular Component: BRISC complex (GO:0070552);;	K20776|1.7e-148|nnu:104588201|K20776 BRISC and BRCA1-A complex member 1 | (RefSeq) uncharacterized LOC104588201	Homologous recombination (ko03440)	--	--	--	--	--	--	PREDICTED: uncharacterized protein LOC104588201 [Nelumbo nucifera]
Nn2g11394	[H]	Coenzyme transport and metabolism	Biological Process: thiamine biosynthetic process (GO:0009228);; Molecular Function: carbon-carbon lyase activity (GO:0016830);; Molecular Function: iron-sulfur cluster binding (GO:0051536);;	K03147|1.1e-50|nnu:104601214|K03147 phosphomethylpyrimidine synthase [EC:4.1.99.17] | (RefSeq) phosphomethylpyrimidine synthase, chloroplastic	Thiamine metabolism (ko00730)	--	--	Radical SAM ThiC family	Phosphomethylpyrimidine synthase, chloroplastic OS=Arabidopsis thaliana OX=3702 GN=THIC PE=1 SV=1	H	Coenzyme transport and metabolism	Phosphomethylpyrimidine synthase [Thalictrum thalictroides]
Nn1g02666	--	--	--	--	--	[R]	General function prediction only	--	--	D	Cell cycle control, cell division, chromosome partitioning	PREDICTED: uncharacterized protein LOC104587837 [Nelumbo nucifera]
Nn1g05781	[G]	Carbohydrate transport and metabolism	Molecular Function: beta-galactosidase activity (GO:0004565);; Biological Process: carbohydrate metabolic process (GO:0005975);; Molecular Function: carbohydrate binding (GO:0030246);;	K12309|3.2e-281|ath:AT3G52840|K12309 beta-galactosidase [EC:3.2.1.23] | (RefSeq) BGAL2; beta-galactosidase 2	Galactose metabolism (ko00052);; Other glycan degradation (ko00511);; Glycosaminoglycan degradation (ko00531);; Sphingolipid metabolism (ko00600);; Glycosphingolipid biosynthesis - ganglio series (ko00604)	[G]	Carbohydrate transport and metabolism	Glycosyl hydrolases family 35	Beta-galactosidase 3 OS=Arabidopsis thaliana OX=3702 GN=BGAL3 PE=2 SV=1	G	Carbohydrate transport and metabolism	PREDICTED: beta-galactosidase 3-like [Nelumbo nucifera]
Nn2g14142	--	--	--	--	--	--	--	PPR repeat family	--	S	Function unknown	PREDICTED: pentatricopeptide repeat-containing protein At3g22470, mitochondrial-like [Nelumbo nucifera]
Nn5g29291	[J]	Translation, ribosomal structure and biogenesis	Molecular Function: RNA binding (GO:0003723);; Molecular Function: structural constituent of ribosome (GO:0003735);; Biological Process: translation (GO:0006412);; Cellular Component: small ribosomal subunit (GO:0015935);;	K02989|3.9e-103|nnu:104607605|K02989 small subunit ribosomal protein S5e | (RefSeq) 40S ribosomal protein S5-like	Ribosome (ko03010)	[J]	Translation, ribosomal structure and biogenesis	Ribosomal protein S7p/S5e	40S ribosomal protein S5 (Fragment) OS=Cicer arietinum OX=3827 GN=RPS5 PE=2 SV=1	J	Translation, ribosomal structure and biogenesis	PREDICTED: 40S ribosomal protein S5-like [Nelumbo nucifera]
Nn3g20663	--	--	Molecular Function: structural constituent of ribosome (GO:0003735);; Cellular Component: ribosome (GO:0005840);; Biological Process: translational elongation (GO:0006414);;	K02943|2.8e-34|nnu:104585963|K02943 large subunit ribosomal protein LP2 | (RefSeq) 60S acidic ribosomal protein P2-2-like	Ribosome (ko03010)	[J]	Translation, ribosomal structure and biogenesis	60s Acidic ribosomal protein	60S acidic ribosomal protein P2B OS=Zea mays OX=4577 GN=RPP2B PE=1 SV=1	J	Translation, ribosomal structure and biogenesis	PREDICTED: 60S acidic ribosomal protein P2-2-like [Nelumbo nucifera]
Nelumbo_nucifera_newGene_815	--	--	--	--	--	--	--	--	--	S	Function unknown	PREDICTED: uncharacterized protein LOC104599835 [Nelumbo nucifera]
Nn1g01374	--	--	Molecular Function: methyltransferase activity (GO:0008168);; Cellular Component: integral component of membrane (GO:0016021);; Biological Process: methylation (GO:0032259);;	K23872|2.6e-106|ats:109765487|K23872 putative homogalacturonan methyltransferase [EC:2.1.1.-] | (RefSeq) LOC109765487; probable methyltransferase PMT13	--	--	--	Putative S-adenosyl-L-methionine-dependent methyltransferase	Probable methyltransferase PMT15 OS=Arabidopsis thaliana OX=3702 GN=At4g00750 PE=2 SV=1	S	Function unknown	PREDICTED: probable methyltransferase PMT15 isoform X3 [Nelumbo nucifera]
Nn1g04625	[R]	General function prediction only	Molecular Function: protein-arginine N-methyltransferase activity (GO:0016274);;	K18477|4.5e-134|nnu:104611655|K18477 type IV protein arginine methyltransferase [EC:2.1.1.322] | (RefSeq) protein arginine N-methyltransferase 2	--	[E]	Amino acid transport and metabolism	Ankyrin repeats (many copies)	--	E	Amino acid transport and metabolism	PREDICTED: protein arginine N-methyltransferase 2 [Nelumbo nucifera]
Nn129s43726	--	--	--	--	--	--	--	--	--	--	--	hypothetical protein GLYMA_13G011700 [Glycine max]
Nn2g15837	[G]	Carbohydrate transport and metabolism	Molecular Function: beta-N-acetylhexosaminidase activity (GO:0004563);; Biological Process: carbohydrate metabolic process (GO:0005975);; Molecular Function: N-acetyl-beta-D-galactosaminidase activity (GO:0102148);;	K12373|0.0e+00|nnu:104611128|K12373 hexosaminidase [EC:3.2.1.52] | (RefSeq) beta-hexosaminidase 2	Other glycan degradation (ko00511);; Various types of N-glycan biosynthesis (ko00513);; Amino sugar and nucleotide sugar metabolism (ko00520);; Glycosaminoglycan degradation (ko00531);; Glycosphingolipid biosynthesis - globo and isoglobo series (ko00603);; Glycosphingolipid biosynthesis - ganglio series (ko00604)	[G]	Carbohydrate transport and metabolism	Glycosyl hydrolase family 20, catalytic domain	Beta-hexosaminidase 2 OS=Arabidopsis thaliana OX=3702 GN=HEXO2 PE=1 SV=1	G	Carbohydrate transport and metabolism	PREDICTED: beta-hexosaminidase 2 [Nelumbo nucifera]
Nn125s43628	--	--	--	--	--	--	--	--	--	--	--	hypothetical protein CSA_004614 [Cucumis sativus]
Nn1g08453	--	--	--	--	--	--	--	--	--	--	--	uncharacterized protein LOC111292314 isoform X1 [Durio zibethinus]
Nn110s43361	--	--	--	--	--	--	--	--	--	--	--	predicted protein [Micromonas pusilla CCMP1545]
Nn5g30211	--	--	Molecular Function: heme oxygenase (decyclizing) activity (GO:0004392);; Biological Process: heme oxidation (GO:0006788);;	K21480|8.8e-72|pper:18791836|K21480 heme oxygenase (biliverdin-producing, ferredoxin) [EC:1.14.15.20] | (RefSeq) probable inactive heme oxygenase 2, chloroplastic	Porphyrin and chlorophyll metabolism (ko00860)	[P]	Inorganic ion transport and metabolism	Heme oxygenase	Probable inactive heme oxygenase 2, chloroplastic OS=Arabidopsis thaliana OX=3702 GN=HO2 PE=2 SV=2	P	Inorganic ion transport and metabolism	PREDICTED: probable inactive heme oxygenase 2, chloroplastic isoform X2 [Nelumbo nucifera]
Nn4g23696	[J]	Translation, ribosomal structure and biogenesis	Molecular Function: translation initiation factor activity (GO:0003743);;	K03680|0.0e+00|nnu:104603062|K03680 translation initiation factor eIF-2B subunit delta | (RefSeq) translation initiation factor eIF-2B subunit delta-like	RNA transport (ko03013)	[J]	Translation, ribosomal structure and biogenesis	Initiation factor 2 subunit family	--	J	Translation, ribosomal structure and biogenesis	PREDICTED: translation initiation factor eIF-2B subunit delta-like [Nelumbo nucifera]
Nn2g12540	[T]	Signal transduction mechanisms	Molecular Function: phosphorelay sensor kinase activity (GO:0000155);; Molecular Function: ATP binding (GO:0005524);; Cellular Component: endoplasmic reticulum membrane (GO:0005789);; Cellular Component: integral component of membrane (GO:0016021);; Molecular Function: ethylene receptor activity (GO:0038199);; Molecular Function: metal ion binding (GO:0046872);; Molecular Function: ethylene bindi…	K14509|8.2e-148|nnu:104600824|K14509 ethylene receptor [EC:2.7.13.-] | (RefSeq) protein EIN4-like	MAPK signaling pathway - plant (ko04016);; Plant hormone signal transduction (ko04075)	[T]	Signal transduction mechanisms	GAF domain	Protein EIN4 OS=Arabidopsis thaliana OX=3702 GN=EIN4 PE=1 SV=1	T	Signal transduction mechanisms	PREDICTED: protein EIN4-like isoform X2 [Nelumbo nucifera]
Nn2g13801	--	--	Molecular Function: zinc ion binding (GO:0008270);;	K10683|8.5e-122|cic:CICLE_v10014038mg|K10683 BRCA1-associated RING domain protein 1 | (RefSeq) hypothetical protein	Homologous recombination (ko03440)	[R]	General function prediction only	PPR repeat	Putative pentatricopeptide repeat-containing protein At3g23330 OS=Arabidopsis thaliana OX=3702 GN=PCMP-H32 PE=3 SV=1	S	Function unknown	PREDICTED: pentatricopeptide repeat-containing protein At5g66520-like [Nelumbo nucifera]
Nn8g39722	--	--	Biological Process: mitotic cell cycle (GO:0000278);; Biological Process: mitotic cytokinesis (GO:0000281);; Biological Process: cytokinesis (GO:0000910);; Biological Process: cytokinesis by cell plate formation (GO:0000911);; Biological Process: cell plate assembly (GO:0000919);; Cellular Component: cellular_component (GO:0005575);; Cellular Component: intracellular (GO:0005622);; Cellular Compo…	K20306|0.0e+00|nnu:104588519|K20306 trafficking protein particle complex subunit 9 | (RefSeq) trafficking protein particle complex II-specific subunit 120 homolog	--	[U]	Intracellular trafficking, secretion, and vesicular transport	Transport protein Trs120 or TRAPPC9, TRAPP II complex subunit	Trafficking protein particle complex II-specific subunit 120 homolog OS=Arabidopsis thaliana OX=3702 GN=TRS120 PE=1 SV=1	U	Intracellular trafficking, secretion, and vesicular transport	PREDICTED: trafficking protein particle complex II-specific subunit 120 homolog isoform X2 [Nelumbo nucifera]
Nn061s42107	--	--	--	--	--	--	--	--	--	--	--	hypothetical protein CSA_004614 [Cucumis sativus]
Nn1g06532	--	--	Cellular Component: integral component of membrane (GO:0016021);;	--	--	--	--	--	--	--	--	PREDICTED: uncharacterized protein LOC104599389 [Nelumbo nucifera]
Nn8g40635	--	--	--	--	--	--	--	--	--	--	--	PREDICTED: uncharacterized protein LOC104589682 [Nelumbo nucifera]
Nn2g12949	[T]	Signal transduction mechanisms	Molecular Function: protein serine/threonine kinase activity (GO:0004674);; Molecular Function: ATP binding (GO:0005524);;	K13430|5.8e-159|nnu:104592805|K13430 serine/threonine-protein kinase PBS1 [EC:2.7.11.1] | (RefSeq) serine/threonine-protein kinase PBS1	Plant-pathogen interaction (ko04626)	[T]	Signal transduction mechanisms	Protein tyrosine and serine/threonine kinase	Probable serine/threonine-protein kinase PBL7 OS=Arabidopsis thaliana OX=3702 GN=PBL7 PE=1 SV=1	T	Signal transduction mechanisms	PREDICTED: serine/threonine-protein kinase CDL1-like isoform X1 [Nelumbo nucifera]
Nn2g14001	--	--	Molecular Function: GTPase activity (GO:0003924);; Molecular Function: GTP binding (GO:0005525);;	K07889|3.9e-53|qsu:112004584|K07889 Ras-related protein Rab-5C | (RefSeq) ras-related protein RABF1-like	Endocytosis (ko04144);; Phagosome (ko04145)	[U]	Intracellular trafficking, secretion, and vesicular transport	Ras family	Ras-related protein RABF1 OS=Arabidopsis thaliana OX=3702 GN=RABF1 PE=1 SV=1	U	Intracellular trafficking, secretion, and vesicular transport	PREDICTED: ras-related protein RABF1-like [Nelumbo nucifera]
Nn5g26966	--	--	Molecular Function: DNA binding (GO:0003677);; Cellular Component: nucleus (GO:0005634);; Cellular Component: host cell nucleus (GO:0042025);; Molecular Function: metal ion binding (GO:0046872);;	K13415|3.1e-20|mdm:103413440|K13415 protein brassinosteroid insensitive 1 [EC:2.7.10.1 2.7.11.1] | (RefSeq) uncharacterized protein LOC103413440 isoform X1	Plant hormone signal transduction (ko04075)	--	--	SBP domain	Squamosa promoter-binding-like protein 3 OS=Oryza sativa subsp. indica OX=39946 GN=SPL3 PE=2 SV=1	S	Function unknown	PREDICTED: squamosa promoter-binding-like protein 3 isoform X1 [Nelumbo nucifera]
Nn8g39436	[R]	General function prediction only	Biological Process: defense response (GO:0006952);; Molecular Function: ADP binding (GO:0043531);;	K13457|5.1e-118|qsu:111991885|K13457 disease resistance protein RPM1 | (RefSeq) putative disease resistance protein At1g50180	Plant-pathogen interaction (ko04626)	[T]	Signal transduction mechanisms	NB-ARC domain	Probable disease resistance protein RXW24L OS=Arabidopsis thaliana OX=3702 GN=RXW24L PE=2 SV=1	T	Signal transduction mechanisms	PREDICTED: disease resistance protein RPP8-like [Nelumbo nucifera]
Nn1g07699	--	--	Molecular Function: structural constituent of ribosome (GO:0003735);; Cellular Component: ribosome (GO:0005840);;	K17427|8.2e-85|nnu:104594322|K17427 large subunit ribosomal protein L46 | (RefSeq) 39S ribosomal protein L46, mitochondrial	--	[J]	Translation, ribosomal structure and biogenesis	--	--	J	Translation, ribosomal structure and biogenesis	PREDICTED: 39S ribosomal protein L46, mitochondrial [Nelumbo nucifera]
Nn3g19864	--	--	Cellular Component: integral component of membrane (GO:0016021);;	K23544|8.8e-248|nnu:104602128|K23544 serine incorporator 1/3 | (RefSeq) probable serine incorporator	--	[S]	Function unknown	Serine incorporator (Serinc)	--	S	Function unknown	PREDICTED: probable serine incorporator isoform X1 [Nelumbo nucifera]
Nn4g22700	--		Molecular Function: protein kinase activity (GO:0004672);; Molecular Function: ATP binding (GO:0005524);; Cellular Component: integral component of membrane (GO:0016021);;	K23544|2.1e-58|brp:103842861|K23544 serine incorporator 1/3 | (RefSeq) serine incorporator 3	--	--	--	Protein tyrosine and serine/threonine kinase	Cysteine-rich receptor-like protein kinase 42 OS=Arabidopsis thaliana OX=3702 GN=CRK42 PE=2 SV=1	T	Signal transduction mechanisms	PREDICTED: cysteine-rich receptor-like protein kinase 1 [Nelumbo nucifera]
Nn2g15175	--	--	Molecular Function: ATP binding (GO:0005524);; Molecular Function: transferase activity (GO:0016740);;	K10576|5.2e-38|nnu:104610637|K10576 ubiquitin-conjugating enzyme E2 H [EC:2.3.2.23] | (RefSeq) ubiquitin-conjugating enzyme E2 4-like	Ubiquitin mediated proteolysis (ko04120)	[O]	Posttranslational modification, protein turnover, chaperones	Ubiquitin-conjugating enzyme	Ubiquitin-conjugating enzyme E2 4 OS=Arabidopsis thaliana OX=3702 GN=UBC4 PE=2 SV=2	O	Posttranslational modification, protein turnover, chaperones	PREDICTED: ubiquitin-conjugating enzyme E2 5-like isoform X1 [Nelumbo nucifera]
Nn7g38114	--	--	Molecular Function: RNA binding (GO:0003723);;	K01148|9.3e-33|nnu:104610967|K01148 poly(A)-specific ribonuclease [EC:3.1.13.4] | (RefSeq) uncharacterized CRM domain-containing protein At3g25440, chloroplastic	RNA degradation (ko03018)	--	--	--	--	L	Replication, recombination and repair	PREDICTED: uncharacterized CRM domain-containing protein At3g25440, chloroplastic isoform X1 [Nelumbo nucifera]
Nn1g08811	--	--	Molecular Function: calcium ion binding (GO:0005509);; Molecular Function: zinc ion binding (GO:0008270);;	K13412|3.9e-06|dzi:111312304|K13412 calcium-dependent protein kinase [EC:2.7.11.1] | (RefSeq) calcium-dependent protein kinase 10-like	Plant-pathogen interaction (ko04626)	--	--	EF hand	--	L	Replication, recombination and repair	PREDICTED: uncharacterized protein LOC104587812 isoform X5 [Nelumbo nucifera]
Nn5g31193	--	--	--	--	--	--	--	--	--	--	--	hypothetical protein CSA_004614 [Cucumis sativus]
Nn067s42265	--	--	--	--	--	--	--	--	--	--	--	hypothetical protein CICLE_v10029531mg [Citrus clementina]
Nn3g19065	--	--	Molecular Function: structural molecule activity (GO:0005198);; Biological Process: protein transport (GO:0015031);; Biological Process: positive regulation of TORC1 signaling (GO:1904263);;	K14299|1.4e-69|nnu:104603966|K14299 nucleoporin SEH1 | (RefSeq) protein SEH1-like	RNA transport (ko03013)	[YU]	Nuclear structure;; Intracellular trafficking, secretion, and vesicular transport	--	Protein SEH1 OS=Arabidopsis thaliana OX=3702 GN=SEH1 PE=1 SV=1	U	Intracellular trafficking, secretion, and vesicular transport	PREDICTED: protein SEH1-like isoform X1 [Nelumbo nucifera]
Nn2g12491	[F]	Nucleotide transport and metabolism	Biological Process: glutamine metabolic process (GO:0006541);;	K22314|5.0e-105|nnu:104589829|K22314 glucosinolate gamma-glutamyl hydrolase [EC:3.4.19.16] | (RefSeq) gamma-glutamyl peptidase 5-like	--	[F]	Nucleotide transport and metabolism	Glutamine amidotransferase class-I	Gamma-glutamyl peptidase 5 OS=Arabidopsis thaliana OX=3702 GN=GGP5 PE=2 SV=1	F	Nucleotide transport and metabolism	PREDICTED: gamma-glutamyl peptidase 5-like [Nelumbo nucifera]
Nn3g18092	[I]	Lipid transport and metabolism	Molecular Function: 3-hydroxyacyl-CoA dehydrogenase activity (GO:0003857);; Cellular Component: peroxisome (GO:0005777);; Biological Process: fatty acid beta-oxidation (GO:0006635);;	K10527|3.4e-67|nnu:104595160|K10527 enoyl-CoA hydratase/3-hydroxyacyl-CoA dehydrogenase [EC:4.2.1.17 1.1.1.35 1.1.1.211] | (RefSeq) peroxisomal fatty acid beta-oxidation multifunctional protein AIM1	Fatty acid degradation (ko00071);; alpha-Linolenic acid metabolism (ko00592);; Fatty acid metabolism (ko01212)	[I]	Lipid transport and metabolism	Enoyl-CoA hydratase/isomerase	Peroxisomal fatty acid beta-oxidation multifunctional protein OS=Oryza sativa subsp. japonica OX=39947 GN=MFP PE=1 SV=2	I	Lipid transport and metabolism	PREDICTED: peroxisomal fatty acid beta-oxidation multifunctional protein AIM1 [Nelumbo nucifera]
Nn119s43435	--	--	--	--	--	--	--	--	--	--	--	hypothetical protein CICLE_v10029531mg [Citrus clementina]
Nn4g22190	--	--	--	--	--	--	--	--	--	--	--	PREDICTED: nucleolin [Nelumbo nucifera]
Nn2g15727	--	--	Cellular Component: plasma membrane (GO:0005886);;	--	--	--	--	Protein of unknown function (DUF1645)	--	S	Function unknown	PREDICTED: uncharacterized protein LOC105971356 [Erythranthe guttata]
Nn1g08833	--	--	Biological Process: protein import into nucleus (GO:0006606);; Molecular Function: Ran GTPase binding (GO:0008536);;	K20221|0.0e+00|nnu:104605771|K20221 importin-4 | (RefSeq) importin-4-like	--	[YU]	Nuclear structure;; Intracellular trafficking, secretion, and vesicular transport	HEAT repeat	--	--	--	PREDICTED: importin-4-like isoform X1 [Nelumbo nucifera]
Nn5g28983	--	--	Cellular Component: plasma membrane (GO:0005886);;	--	--	--	--	Ubiquitin-2 like Rad60 SUMO-like	Membrane-anchored ubiquitin-fold protein 3 OS=Oryza sativa subsp. japonica OX=39947 GN=MUB3 PE=3 SV=1	S	Function unknown	PREDICTED: membrane-anchored ubiquitin-fold protein 3-like isoform X2 [Nelumbo nucifera]
Nn4g24648	[E]	Amino acid transport and metabolism	Biological Process: histidine biosynthetic process (GO:0000105);; Molecular Function: magnesium ion binding (GO:0000287);; Molecular Function: ATP phosphoribosyltransferase activity (GO:0003879);; Cellular Component: cytoplasm (GO:0005737);;	K00765|1.5e-228|nnu:104611048|K00765 ATP phosphoribosyltransferase [EC:2.4.2.17] | (RefSeq) ATP phosphoribosyltransferase 1, chloroplastic-like	Histidine metabolism (ko00340);; Biosynthesis of amino acids (ko01230)	[E]	Amino acid transport and metabolism	ATP phosphoribosyltransferase	ATP phosphoribosyltransferase 1, chloroplastic OS=Arabidopsis thaliana OX=3702 GN=HISN1A PE=1 SV=1	E	Amino acid transport and metabolism	PREDICTED: ATP phosphoribosyltransferase 1, chloroplastic-like [Nelumbo nucifera]
Nn2g10813	--	--	Biological Process: cellular protein modification process (GO:0006464);;	K13113|7.1e-36|cpap:110814661|K13113 ubiquitin-like protein 5 | (RefSeq) ubiquitin-like protein 5	--	[O]	Posttranslational modification, protein turnover, chaperones	Ubiquitin family	Ubiquitin-like protein 5 OS=Arabidopsis thaliana OX=3702 GN=UBL5 PE=3 SV=1	O	Posttranslational modification, protein turnover, chaperones	PREDICTED: ubiquitin-like protein 5 [Nelumbo nucifera]
Nn2g10759	[HT]	Coenzyme transport and metabolism;; Signal transduction mechanisms	Molecular Function: protein kinase activity (GO:0004672);; Molecular Function: ATP binding (GO:0005524);;	K08869|0.0e+00|nnu:104594829|K08869 aarF domain-containing kinase | (RefSeq) uncharacterized protein sll0005	--	[R]	General function prediction only	ABC1 family	Protein ACTIVITY OF BC1 COMPLEX KINASE 3, chloroplastic OS=Arabidopsis thaliana OX=3702 GN=ABC1K3 PE=1 SV=1	L	Replication, recombination and repair	PREDICTED: uncharacterized protein LOC104594829 [Nelumbo nucifera]
Nn1g05822	--	--	--	K17086|8.2e-16|fve:101300290|K17086 transmembrane 9 superfamily member 2/4 | (RefSeq) uncharacterized LOC101300290	--	--	--	--	--	S	Function unknown	PREDICTED: uncharacterized protein LOC104591381 [Nelumbo nucifera]
Nn1g05956	--	--	Molecular Function: microtubule motor activity (GO:0003777);; Molecular Function: ATP binding (GO:0005524);; Cellular Component: microtubule (GO:0005874);; Biological Process: microtubule-based movement (GO:0007018);; Molecular Function: microtubule binding (GO:0008017);;	K10401|4.0e-294|nnu:104607572|K10401 kinesin family member 18/19 | (RefSeq) kinesin-like protein KIN-8B	--	[Z]	Cytoskeleton	Kinesin motor domain	Kinesin-like protein KIN-8B OS=Arabidopsis thaliana OX=3702 GN=KIN8B PE=2 SV=1	Z	Cytoskeleton	PREDICTED: kinesin-like protein KIN-8B isoform X1 [Nelumbo nucifera]
Nn1g03103	--	--	Cellular Component: extracellular region (GO:0005576);; Biological Process: rejection of self pollen (GO:0060320);;	--	--	--	--	Plant self-incompatibility protein S1	S-protein homolog 5 OS=Arabidopsis thaliana OX=3702 GN=SPH5 PE=2 SV=1	S	Function unknown	PREDICTED: pumilio homolog 15-like [Nelumbo nucifera]
Nn1g05994	[S]	Function unknown	--	K11168|3.1e-184|nnu:104605506|K11168 dehydrogenase/reductase SDR family member 12 [EC:1.1.-.-] | (RefSeq) dehydrogenase/reductase SDR family member 12	--	[Q]	Secondary metabolites biosynthesis, transport and catabolism	short chain dehydrogenase	Protochlorophyllide reductase, chloroplastic OS=Marchantia paleacea OX=56867 GN=PORA PE=2 SV=1	Q	Secondary metabolites biosynthesis, transport and catabolism	PREDICTED: dehydrogenase/reductase SDR family member 12 [Nelumbo nucifera]
Nn1g09050	[T]	Signal transduction mechanisms	Molecular Function: protein kinase activity (GO:0004672);; Molecular Function: ATP binding (GO:0005524);;	K13435|1.0e-58|spen:107018783|K13435 serine/threonine-protein kinase Pto | (RefSeq) receptor-like protein kinase HERK 1 isoform X2	Plant-pathogen interaction (ko04626)	[T]	Signal transduction mechanisms	Protein tyrosine and serine/threonine kinase	Probable receptor-like protein kinase At5g24010 OS=Arabidopsis thaliana OX=3702 GN=At5g24010 PE=1 SV=1	T	Signal transduction mechanisms	PREDICTED: LOW QUALITY PROTEIN: probable receptor-like protein kinase At5g24010, partial [Nelumbo nucifera]
Nn4g24610	--	--	Molecular Function: electron carrier activity (GO:0009055);;	--	--	--	--	Plastocyanin-like domain	--	S	Function unknown	PREDICTED: lamin-like protein [Nelumbo nucifera]
Nn5g28723	--	--	Biological Process: generation of catalytic spliceosome for second transesterification step (GO:0000350);;	K12870|1.2e-153|nnu:104599888|K12870 pre-mRNA-splicing factor ISY1 | (RefSeq) pre-mRNA-splicing factor ISY1 homolog	Spliceosome (ko03040)	[A]	RNA processing and modification	Isy1-like splicing family	--	A	RNA processing and modification	PREDICTED: pre-mRNA-splicing factor ISY1 homolog [Nelumbo nucifera]
Nn2g15925	--	--	Molecular Function: RNA binding (GO:0003723);; Molecular Function: metal ion binding (GO:0046872);;	--	--	--	--	Torus domain	Zinc finger CCCH domain-containing protein 53 OS=Oryza sativa subsp. japonica OX=39947 GN=Os07g0682400 PE=2 SV=1	A	RNA processing and modification	PREDICTED: zinc finger CCCH domain-containing protein 53-like isoform X1 [Nelumbo nucifera]
Nn1g02939	--	--	--	--	--	--	--	--	--	--	--	hypothetical protein CMV_008585 [Castanea mollissima]
Nn1g08112	--	--	Molecular Function: monooxygenase activity (GO:0004497);; Molecular Function: iron ion binding (GO:0005506);; Molecular Function: oxidoreductase activity, acting on paired donors, with incorporation or reduction of molecular oxygen (GO:0016705);; Molecular Function: heme binding (GO:0020037);;	K23136|1.0e-76|jre:109010345|K23136 fraxetin 5-hydroxylase [EC:1.14.14.164] | (RefSeq) xanthotoxin 5-hydroxylase CYP82C4-like	--	[Q]	Secondary metabolites biosynthesis, transport and catabolism	Cytochrome P450	Xanthotoxin 5-hydroxylase CYP82C4 OS=Arabidopsis thaliana OX=3702 GN=CYP82C4 PE=1 SV=1	Q	Secondary metabolites biosynthesis, transport and catabolism	PREDICTED: cytochrome P450 82C4-like, partial [Nelumbo nucifera]
Nn8g40990	--	--	Molecular Function: transferase activity, transferring acyl groups other than amino-acyl groups (GO:0016747);;	K13264|3.5e-37|mtr:MTR_6g015315|K13264 isoflavone 7-O-glucoside-6''-O-malonyltransferase [EC:2.3.1.115] | (RefSeq) malonyl-CoA:isoflavone 7-O-glucoside malonyltransferase	Isoflavonoid biosynthesis (ko00943);; Flavone and flavonol biosynthesis (ko00944)	--	--	Transferase family	Phenolic glucoside malonyltransferase 1 OS=Arabidopsis thaliana OX=3702 GN=PMAT1 PE=1 SV=1	S	Function unknown	PREDICTED: agmatine coumaroyltransferase-like [Nelumbo nucifera]
Nn1g03245	--	--	Molecular Function: protein binding (GO:0005515);; Cellular Component: cellular_component (GO:0005575);; Cellular Component: intracellular (GO:0005622);; Cellular Component: cell (GO:0005623);; Cellular Component: nucleus (GO:0005634);; Cellular Component: organelle (GO:0043226);; Cellular Component: membrane-bounded organelle (GO:0043227);; Cellular Component: intracellular organelle (GO:0043229…	--	--	[U]	Intracellular trafficking, secretion, and vesicular transport	Armadillo/beta-catenin-like repeat	--	U	Intracellular trafficking, secretion, and vesicular transport	PREDICTED: armadillo repeat-containing protein 4-like [Nelumbo nucifera]
Nn7g37146	--	--	Cellular Component: nucleus (GO:0005634);; Biological Process: intracellular protein transport (GO:0006886);; Molecular Function: Ran GTPase binding (GO:0008536);;	K20223|0.0e+00|nnu:104593565|K20223 importin-7 | (RefSeq) importin beta-like SAD2	--	[YU]	Nuclear structure;; Intracellular trafficking, secretion, and vesicular transport	Importin-beta N-terminal domain	Importin beta-like SAD2 OS=Arabidopsis thaliana OX=3702 GN=SAD2 PE=1 SV=1	--	--	PREDICTED: importin beta-like SAD2 [Nelumbo nucifera]
Nn1g10009	--	--	--	--	--	--	--	Mitovirus RNA-dependent RNA polymerase	--	S	Function unknown	hypothetical protein AQUCO_04400096v1 [Aquilegia coerulea]
Nn6g32291	--	--	--	--	--	--	--	--	--	--	--	PREDICTED: uncharacterized protein LOC104590104 [Nelumbo nucifera]
Nn4g26202	--	--	--	--	--	--	--	C2H2-type zinc finger	--	--	--	--
Nn8g38736	[G]	Carbohydrate transport and metabolism	Molecular Function: phosphogluconate dehydrogenase (decarboxylating) activity (GO:0004616);; Biological Process: pentose-phosphate shunt (GO:0006098);; Biological Process: D-gluconate metabolic process (GO:0019521);; Molecular Function: NADP binding (GO:0050661);;	K00033|7.4e-286|nnu:104600620|K00033 6-phosphogluconate dehydrogenase [EC:1.1.1.44 1.1.1.343] | (RefSeq) 6-phosphogluconate dehydrogenase, decarboxylating 1, chloroplastic	Pentose phosphate pathway (ko00030);; Glutathione metabolism (ko00480);; Carbon metabolism (ko01200)	[G]	Carbohydrate transport and metabolism	6-phosphogluconate dehydrogenase, C-terminal domain	6-phosphogluconate dehydrogenase, decarboxylating 1, chloroplastic OS=Arabidopsis thaliana OX=3702 GN=PGD1 PE=1 SV=1	G	Carbohydrate transport and metabolism	PREDICTED: 6-phosphogluconate dehydrogenase, decarboxylating 1, chloroplastic [Nelumbo nucifera]
Nn3g19908	--	--	Molecular Function: DNA binding (GO:0003677);; Molecular Function: metal ion binding (GO:0046872);;	--	--	[R]	General function prediction only	--	Protein CHROMATIN REMODELING 4 OS=Arabidopsis thaliana OX=3702 GN=CHR4 PE=2 SV=1	--	--	PREDICTED: protein CHROMATIN REMODELING 4-like [Nelumbo nucifera]
Nn1g03788	--	--	Cellular Component: integral component of membrane (GO:0016021);; Biological Process: recognition of pollen (GO:0048544);;	K03327|7.8e-10|cic:CICLE_v10018703mg|K03327 multidrug resistance protein, MATE family | (RefSeq) hypothetical protein	--	--	--	D-mannose binding lectin	G-type lectin S-receptor-like serine/threonine-protein kinase At4g27290 OS=Arabidopsis thaliana OX=3702 GN=At4g27290 PE=3 SV=4	T	Signal transduction mechanisms	hypothetical protein F0562_010234 [Nyssa sinensis]
Nn2g13438	[T]	Signal transduction mechanisms	Molecular Function: protein kinase activity (GO:0004672);; Molecular Function: ATP binding (GO:0005524);; Cellular Component: integral component of membrane (GO:0016021);; Molecular Function: carbohydrate binding (GO:0030246);;	K01176|4.4e-71|sbi:8065370|K01176 alpha-amylase [EC:3.2.1.1] | (RefSeq) alpha-amylase isozyme 2A	Starch and sucrose metabolism (ko00500)	--	--	Legume lectin domain	L-type lectin-domain containing receptor kinase IV.1 OS=Arabidopsis thaliana OX=3702 GN=LECRK41 PE=2 SV=1	T	Signal transduction mechanisms	PREDICTED: L-type lectin-domain containing receptor kinase IV.1-like isoform X1 [Nelumbo nucifera]
Nn5g30359	--	--	Molecular Function: transferase activity, transferring acyl groups other than amino-acyl groups (GO:0016747);;	K19747|8.6e-63|pda:103705482|K19747 BAHD acyltransferase [EC:2.3.1.-] | (RefSeq) BAHD acyltransferase DCR	--	--	--	Transferase family	Uncharacterized acetyltransferase At3g50280 OS=Arabidopsis thaliana OX=3702 GN=At3g50280 PE=3 SV=1	S	Function unknown	PREDICTED: uncharacterized acetyltransferase At3g50280 [Nelumbo nucifera]
Nn7g37460	--	--	Cellular Component: integral component of membrane (GO:0016021);;	--	--	--	--	--	--	--	--	PREDICTED: uncharacterized protein LOC104593354 [Nelumbo nucifera]
Nn105s43234	--	--	--	--	--	--	--	--	--	--	--	uncharacterized protein LOC118033973 [Populus alba]
Nn3g16735	--	--	Molecular Function: double-stranded DNA binding (GO:0003690);; Biological Process: regulation of transcription, DNA-templated (GO:0006355);;	K15032|5.5e-175|nnu:104589308|K15032 mTERF domain-containing protein, mitochondrial | (RefSeq) transcription termination factor MTERF4, chloroplastic	--	[KR]	Transcription;; General function prediction only	mTERF	Transcription termination factor MTERF4, chloroplastic OS=Arabidopsis thaliana OX=3702 GN=MTERF4 PE=1 SV=1	K	Transcription	PREDICTED: transcription termination factor MTERF4, chloroplastic [Nelumbo nucifera]
Nn4g24951	--	--	Biological Process: reproduction (GO:0000003);; Biological Process: developmental process involved in reproduction (GO:0003006);; Molecular Function: molecular_function (GO:0003674);; Molecular Function: transcription factor activity, sequence-specific DNA binding (GO:0003700);; Cellular Component: cellular_component (GO:0005575);; Cellular Component: intracellular (GO:0005622);; Cellular Compone…	--	--	[K]	Transcription	PWWP domain	ENHANCER OF AG-4 protein 2 OS=Arabidopsis thaliana OX=3702 GN=HUA2 PE=2 SV=1	K	Transcription	PREDICTED: ENHANCER OF AG-4 protein 2-like isoform X4 [Nelumbo nucifera]
Nn5g28232	--	--	Molecular Function: ADP binding (GO:0043531);;	K13459|0.0e+00|nnu:104608556|K13459 disease resistance protein RPS2 | (RefSeq) disease resistance protein At4g27190-like	Plant-pathogen interaction (ko04626)	[T]	Signal transduction mechanisms	NB-ARC domain	Disease resistance protein At4g27190 OS=Arabidopsis thaliana OX=3702 GN=At4g27190 PE=2 SV=1	T	Signal transduction mechanisms	PREDICTED: disease resistance protein At4g27190-like [Nelumbo nucifera]
Nn4g23424	[E]	Amino acid transport and metabolism	Biological Process: reproduction (GO:0000003);; Molecular Function: magnesium ion binding (GO:0000287);; Biological Process: developmental process involved in reproduction (GO:0003006);; Molecular Function: molecular_function (GO:0003674);; Molecular Function: catalytic activity (GO:0003824);; Molecular Function: phosphoserine phosphatase activity (GO:0004647);; Molecular Function: binding (GO:00…	K01079|1.3e-157|nnu:104598170|K01079 phosphoserine phosphatase [EC:3.1.3.3] | (RefSeq) phosphoserine phosphatase, chloroplastic-like	Glycine, serine and threonine metabolism (ko00260);; Carbon metabolism (ko01200);; Biosynthesis of amino acids (ko01230)	[E]	Amino acid transport and metabolism	haloacid dehalogenase-like hydrolase	Phosphoserine phosphatase, chloroplastic OS=Arabidopsis thaliana OX=3702 GN=PSP PE=1 SV=2	E	Amino acid transport and metabolism	PREDICTED: phosphoserine phosphatase, chloroplastic-like [Nelumbo nucifera]
Nn6g35333	[M]	Cell wall/membrane/envelope biogenesis	Molecular Function: protein serine/threonine kinase activity (GO:0004674);; Molecular Function: ATP binding (GO:0005524);; Cellular Component: integral component of membrane (GO:0016021);;	K00924|0.0e+00|nnu:104604480|K00924 kinase [EC:2.7.1.-] | (RefSeq) receptor-like protein kinase HSL1	--	--	--	Protein kinase domain	Receptor-like protein kinase 5 OS=Arabidopsis thaliana OX=3702 GN=RLK5 PE=1 SV=1	T	Signal transduction mechanisms	PREDICTED: receptor-like protein kinase HSL1 [Nelumbo nucifera]
Nn4g23219	--	--	Molecular Function: molecular_function (GO:0003674);; Molecular Function: nucleic acid binding (GO:0003676);; Molecular Function: RNA binding (GO:0003723);; Molecular Function: catalytic activity (GO:0003824);; Molecular Function: nuclease activity (GO:0004518);; Molecular Function: endonuclease activity (GO:0004519);; Molecular Function: binding (GO:0005488);; Cellular Component: cellular_compon…	K17710|9.1e-09|ath:AT5G25630|K17710 pentatricopeptide repeat domain-containing protein 1 | (RefSeq) Tetratricopeptide repeat (TPR)-like superfamily protein	--	[R]	General function prediction only	PPR repeat family	Pentatricopeptide repeat-containing protein At5g15280, mitochondrial OS=Arabidopsis thaliana OX=3702 GN=At5g15280 PE=1 SV=1	S	Function unknown	PREDICTED: pentatricopeptide repeat-containing protein At5g15280 [Nelumbo nucifera]
Nn1g02771	--	--	Molecular Function: nutrient reservoir activity (GO:0045735);;	--	--	--	--	Cupin	11S globulin seed storage protein 1 OS=Carya illinoinensis OX=32201 PE=1 SV=1	O	Posttranslational modification, protein turnover, chaperones	PREDICTED: 11S globulin subunit beta-like [Nelumbo nucifera]
Nn338s46404	--	--	--	--	--	--	--	--	--	--	--	hypothetical protein D0Y65_055488 [Glycine soja]
Nn8g38508	[E]	Amino acid transport and metabolism	Cellular Component: integral component of membrane (GO:0016021);; Molecular Function: oxidoreductase activity (GO:0016491);;	K14157|0.0e+00|hbr:110636543|K14157 alpha-aminoadipic semialdehyde synthase [EC:1.5.1.8 1.5.1.9] | (RefSeq) alpha-aminoadipic semialdehyde synthase-like isoform X1	Lysine degradation (ko00310)	[E]	Amino acid transport and metabolism	Saccharopine dehydrogenase C-terminal domain	Alpha-aminoadipic semialdehyde synthase OS=Arabidopsis thaliana OX=3702 GN=LKR/SDH PE=1 SV=1	E	Amino acid transport and metabolism	Saccharopine dehydrogenase / Homospermidine synthase [Macleaya cordata]
Nn1g01522	--	--	Molecular Function: structural constituent of ribosome (GO:0003735);; Cellular Component: ribosome (GO:0005840);; Biological Process: translation (GO:0006412);;	K02920|1.1e-51|nnu:104596062|K02920 large subunit ribosomal protein L36e | (RefSeq) 60S ribosomal protein L36-2-like	Ribosome (ko03010)	[J]	Translation, ribosomal structure and biogenesis	Ribosomal protein L36e	60S ribosomal protein L36-2 OS=Arabidopsis thaliana OX=3702 GN=RPL36B PE=3 SV=1	J	Translation, ribosomal structure and biogenesis	PREDICTED: 60S ribosomal protein L36-2-like [Nelumbo nucifera]
Nelumbo_nucifera_newGene_3277	--	--	--	--	--	--	--	Cotton fibre expressed protein	--	--	--	--
Nn3g19064	[M]	Cell wall/membrane/envelope biogenesis	Molecular Function: catalytic activity (GO:0003824);;	K08695|2.2e-38|nnu:104593362|K08695 anthocyanidin reductase [EC:1.3.1.77] | (RefSeq) anthocyanidin reductase-like	Flavonoid biosynthesis (ko00941)	[V]	Defense mechanisms	NAD dependent epimerase/dehydratase family	Putative anthocyanidin reductase OS=Ginkgo biloba OX=3311 PE=2 SV=1	V	Defense mechanisms	PREDICTED: vestitone reductase-like [Nelumbo nucifera]
Nn3g19481	[R]	General function prediction only	Molecular Function: chitinase activity (GO:0004568);; Biological Process: carbohydrate metabolic process (GO:0005975);; Biological Process: chitin catabolic process (GO:0006032);; Biological Process: cell wall macromolecule catabolic process (GO:0016998);;	K20547|3.9e-79|nnu:104609578|K20547 basic endochitinase B [EC:3.2.1.14] | (RefSeq) endochitinase-like	Amino sugar and nucleotide sugar metabolism (ko00520);; MAPK signaling pathway - plant (ko04016)	[R]	General function prediction only	Chitinase class I	Inactive chitinase-like protein 1 OS=Hevea brasiliensis OX=3981 GN=CHI-L1 PE=1 SV=2	U	Intracellular trafficking, secretion, and vesicular transport	PREDICTED: endochitinase-like [Nelumbo nucifera]
Nn4g23775	--	--	Cellular Component: mitochondrion (GO:0005739);;	K18171|2.3e-35|nnu:104603007|K18171 COX assembly mitochondrial protein 1 | (RefSeq) uncharacterized protein DDB_G0275933-like	--	[S]	Function unknown	Cytochrome c oxidase biogenesis protein Cmc1 like	--	S	Function unknown	PREDICTED: uncharacterized protein DDB_G0275933-like isoform X2 [Nelumbo nucifera]
Nn6g33462	--	--	Molecular Function: GTPase activity (GO:0003924);; Molecular Function: structural constituent of cytoskeleton (GO:0005200);; Molecular Function: GTP binding (GO:0005525);; Cellular Component: cytoplasm (GO:0005737);; Cellular Component: microtubule (GO:0005874);; Biological Process: microtubule-based process (GO:0007017);;	K07375|1.7e-123|nnu:104608696|K07375 tubulin beta | (RefSeq) tubulin beta-6 chain-like	Phagosome (ko04145)	[Z]	Cytoskeleton	Tubulin C-terminal domain	Tubulin beta chain OS=Hordeum vulgare OX=4513 GN=TUBB PE=2 SV=1	Z	Cytoskeleton	PREDICTED: tubulin beta-6 chain-like [Nelumbo nucifera]
Nn1g05283	[I]	Lipid transport and metabolism	Biological Process: fatty acid biosynthetic process (GO:0006633);; Molecular Function: hydro-lyase activity (GO:0016836);;	K02372|1.0e-131|nnu:104605933|K02372 3-hydroxyacyl-[acyl-carrier-protein] dehydratase [EC:4.2.1.59] | (RefSeq) 3-hydroxyacyl-[acyl-carrier-protein] dehydratase FabZ-like	Fatty acid biosynthesis (ko00061);; Biotin metabolism (ko00780);; Fatty acid metabolism (ko01212)	--	--	FabA-like domain	--	I	Lipid transport and metabolism	PREDICTED: uncharacterized protein LOC104605933 [Nelumbo nucifera]
Nn076s42473	--	--	--	--	--	[R]	General function prediction only	--	--	B	Chromatin structure and dynamics	unnamed protein product [Microthlaspi erraticum]
Nn1g06762	--	--	Cellular Component: integral component of membrane (GO:0016021);;	--	--	--	--	--	--	--	--	PREDICTED: uncharacterized protein LOC104605685 [Nelumbo nucifera]
Nn6g33896	--	--	Cellular Component: integral component of membrane (GO:0016021);;	K11584|3.5e-30|dcr:108200982|K11584 serine/threonine-protein phosphatase 2A regulatory subunit B' | (RefSeq) serine/threonine protein phosphatase 2A 57 kDa regulatory subunit B' beta isoform-like	mRNA surveillance pathway (ko03015)	--	--	--	GPI-anchored protein LLG1 OS=Arabidopsis thaliana OX=3702 GN=LLG1 PE=1 SV=1	S	Function unknown	PREDICTED: GPI-anchored protein LORELEI-like [Nelumbo nucifera]
Nn1g04743	[O]	Posttranslational modification, protein turnover, chaperones	Molecular Function: cysteine-type peptidase activity (GO:0008234);;	K16292|3.5e-117|csl:COCSUDRAFT_21961|K16292 KDEL-tailed cysteine endopeptidase [EC:3.4.22.-] | (RefSeq) hypothetical protein	--	[O]	Posttranslational modification, protein turnover, chaperones	Papain family cysteine protease	Cysteine proteinase RD21A OS=Arabidopsis thaliana OX=3702 GN=RD21A PE=1 SV=1	O	Posttranslational modification, protein turnover, chaperones	PREDICTED: cysteine proteinase RD21A-like [Nelumbo nucifera]
Nn8g39456	--	--	Biological Process: cellular response to phosphate starvation (GO:0016036);;	--	--	[P]	Inorganic ion transport and metabolism	SPX domain	SPX domain-containing protein 2 OS=Arabidopsis thaliana OX=3702 GN=SPX2 PE=2 SV=1	P	Inorganic ion transport and metabolism	PREDICTED: SPX domain-containing protein 1-like [Nelumbo nucifera]
Nn3g16254	--	--	Cellular Component: cellular_component (GO:0005575);; Cellular Component: intracellular (GO:0005622);; Cellular Component: cell (GO:0005623);; Cellular Component: cytoplasm (GO:0005737);; Cellular Component: vacuole (GO:0005773);; Cellular Component: organelle (GO:0043226);; Cellular Component: membrane-bounded organelle (GO:0043227);; Cellular Component: intracellular organelle (GO:0043229);; Ce…	--	--	--	--	--	Uncharacterized protein At4g14100 OS=Arabidopsis thaliana OX=3702 GN=At4g14100 PE=2 SV=1	S	Function unknown	PREDICTED: uncharacterized protein At4g14100-like [Nelumbo nucifera]
Nn188s44683	--	--	--	--	--	--	--	--	--	--	--	unnamed protein product [Prunus armeniaca]
Nn1g06756	[GR]	Carbohydrate transport and metabolism;; General function prediction only	Molecular Function: riboflavin kinase activity (GO:0008531);; Biological Process: riboflavin biosynthetic process (GO:0009231);; Molecular Function: hydrolase activity (GO:0016787);;	K20884|6.9e-162|nnu:104612283|K20884 riboflavin kinase / FMN hydrolase [EC:2.7.1.26 3.1.3.102] | (RefSeq) bifunctional riboflavin kinase/FMN phosphatase	Riboflavin metabolism (ko00740)	[H]	Coenzyme transport and metabolism	Haloacid dehalogenase-like hydrolase	Bifunctional riboflavin kinase/FMN phosphatase OS=Arabidopsis thaliana OX=3702 GN=FHY PE=1 SV=1	H	Coenzyme transport and metabolism	PREDICTED: bifunctional riboflavin kinase/FMN phosphatase isoform X2 [Nelumbo nucifera]
Nn1g05206	--	--	Biological Process: histone exchange (GO:0043486);; Molecular Function: metal ion binding (GO:0046872);;	K11663|3.0e-85|nnu:104589310|K11663 zinc finger HIT domain-containing protein 1 | (RefSeq) SWR1 complex subunit 6	--	[R]	General function prediction only	HIT zinc finger	SWR1 complex subunit 6 OS=Arabidopsis thaliana OX=3702 GN=SWC6 PE=1 SV=1	S	Function unknown	PREDICTED: SWR1 complex subunit 6 [Nelumbo nucifera]
Nn6g34510	--	--	--	--	--	--	--	--	--	--	--	PREDICTED: uncharacterized protein LOC104591250 [Nelumbo nucifera]
Nn282s46099	--	--	--	--	--	--	--	--	--	--	--	unnamed protein product [Prunus armeniaca]
Nn4g23677	--	--	Molecular Function: electron carrier activity (GO:0009055);; Cellular Component: integral component of membrane (GO:0016021);;	--	--	--	--	Plastocyanin-like domain	Early nodulin-like protein 2 OS=Arabidopsis thaliana OX=3702 GN=At4g27520 PE=1 SV=1	S	Function unknown	PREDICTED: mavicyanin-like [Nelumbo nucifera]
Nn6g32601	--	--	--	--	--	--	--	--	--	--	--	hypothetical protein LR48_Vigan05g084500 [Vigna angularis]
Nn7g38340	--	--	Molecular Function: DNA binding (GO:0003677);; Cellular Component: nucleus (GO:0005634);;	K09422|2.4e-96|nnu:104599741|K09422 transcription factor MYB, plant | (RefSeq) transcription factor MYB114-like	--	[K]	Transcription	Myb-like DNA-binding domain	Transcription factor MYB1 OS=Actinidia chinensis var. chinensis OX=1590841 GN=MYB1 PE=2 SV=1	--	--	PREDICTED: transcription factor MYB114-like [Nelumbo nucifera]
Nn3g20020	--	--	Cellular Component: integral component of membrane (GO:0016021);;	K17496|2.7e-93|nnu:104609413|K17496 mitochondrial import inner membrane translocase subunit TIM50 | (RefSeq) mitochondrial import inner membrane translocase subunit TIM50-like	--	[K]	Transcription	--	Mitochondrial import inner membrane translocase subunit TIM50 OS=Arabidopsis thaliana OX=3702 GN=TIM50 PE=1 SV=1	K	Transcription	PREDICTED: mitochondrial import inner membrane translocase subunit TIM50-like [Nelumbo nucifera]
Nn4g24160	--	--	Biological Process: response to acid chemical (GO:0001101);; Cellular Component: cellular_component (GO:0005575);; Cellular Component: intracellular (GO:0005622);; Cellular Component: cell (GO:0005623);; Cellular Component: nucleus (GO:0005634);; Biological Process: biological_process (GO:0008150);; Biological Process: response to endogenous stimulus (GO:0009719);; Biological Process: response to…	K06910|9.0e-69|boe:106294014|K06910 phosphatidylethanolamine-binding protein | (RefSeq) protein MOTHER of FT and TF 1	--	[R]	General function prediction only	Phosphatidylethanolamine-binding protein	Protein MOTHER of FT and TFL1 OS=Arabidopsis thaliana OX=3702 GN=MFT PE=1 SV=1	S	Function unknown	PREDICTED: protein MOTHER of FT and TFL1-like [Nelumbo nucifera]
Nn5g31070	--	--	Biological Process: mitotic spindle assembly checkpoint (GO:0007094);;	K02178|1.8e-223|nnu:104603837|K02178 checkpoint serine/threonine-protein kinase [EC:2.7.11.1] | (RefSeq) mitotic spindle checkpoint protein BUBR1	--	[D]	Cell cycle control, cell division, chromosome partitioning	Mad3/BUB1 homology region 1	Mitotic spindle checkpoint protein BUBR1 OS=Arabidopsis thaliana OX=3702 GN=BUBR1 PE=1 SV=2	D	Cell cycle control, cell division, chromosome partitioning	PREDICTED: mitotic spindle checkpoint protein BUBR1 [Nelumbo nucifera]
Nn5g28278	--	--	Cellular Component: integral component of membrane (GO:0016021);;	--	--	--	--	--	--	--	--	PREDICTED: uncharacterized membrane protein At1g06890-like [Nelumbo nucifera]
Nn5g31384	--	--	--	--	--	--	--	--	--	--	--	hypothetical protein D0Y65_055488 [Glycine soja]
Nn2g11301	--	--	Molecular Function: copper ion transmembrane transporter activity (GO:0005375);; Biological Process: cellular copper ion homeostasis (GO:0006878);; Cellular Component: integral component of membrane (GO:0016021);;	K14686|6.8e-84|nnu:104597055|K14686 solute carrier family 31 (copper transporter), member 1 | (RefSeq) copper transporter 6-like	--	[P]	Inorganic ion transport and metabolism	Ctr copper transporter family	Copper transporter 1 OS=Arabidopsis thaliana OX=3702 GN=COPT1 PE=2 SV=2	P	Inorganic ion transport and metabolism	PREDICTED: copper transporter 6-like [Nelumbo nucifera]
Nn3g17379	--	--	--	--	--	--	--	--	EID1-like F-box protein 1 OS=Arabidopsis thaliana OX=3702 GN=EDL1 PE=2 SV=1	S	Function unknown	EID1-like F-box protein 2 [Vitis vinifera]
Nn4g26380	--	--	Cellular Component: integral component of membrane (GO:0016021);; Molecular Function: protein-cysteine S-palmitoyltransferase activity (GO:0019706);;	K20028|8.3e-166|nnu:104611316|K20028 palmitoyltransferase ZDHHC2/15/20 [EC:2.3.1.225] | (RefSeq) probable protein S-acyltransferase 14	--	[R]	General function prediction only	DHHC palmitoyltransferase	Probable protein S-acyltransferase 14 OS=Arabidopsis thaliana OX=3702 GN=PAT14 PE=2 SV=1	I	Lipid transport and metabolism	PREDICTED: probable protein S-acyltransferase 14 [Nelumbo nucifera]
Nn7g37091	--	--	Molecular Function: zinc ion binding (GO:0008270);;	K22733|4.6e-17|cit:102612526|K22733 magnesium transporter | (RefSeq) uncharacterized protein LOC102612526	--	[R]	General function prediction only	--	Pentatricopeptide repeat-containing protein At4g02750 OS=Arabidopsis thaliana OX=3702 GN=PCMP-H24 PE=3 SV=1	S	Function unknown	PREDICTED: pentatricopeptide repeat-containing protein At1g08070, chloroplastic-like [Nelumbo nucifera]
Nn5g30967	--	--	Molecular Function: molecular_function (GO:0003674);; Molecular Function: transcription factor activity, sequence-specific DNA binding (GO:0003700);; Molecular Function: protein binding (GO:0005515);; Biological Process: regulation of transcription, DNA-templated (GO:0006355);; Biological Process: biological_process (GO:0008150);; Biological Process: regulation of biosynthetic process (GO:0009889…	K14494|6.3e-23|pop:18106830|K14494 DELLA protein | (RefSeq) uncharacterized protein LOC18106830	Plant hormone signal transduction (ko04075)	--	--	RWP-RK domain	Protein NLP2 OS=Arabidopsis thaliana OX=3702 GN=NLP2 PE=2 SV=3	K	Transcription	PREDICTED: protein NLP4 [Nelumbo nucifera]
Nn1g01876	--	--	--	K12827|4.7e-09|zma:100217051|K12827 splicing factor 3A subunit 3 | (RefSeq) uncharacterized protein LOC100217051	Spliceosome (ko03040)	[S]	Function unknown	Silencing defective 2 N-terminal ubiquitin domain	--	O	Posttranslational modification, protein turnover, chaperones	PREDICTED: protein SDE2 homolog [Nelumbo nucifera]
Nn1g09098	--	--	Cellular Component: integral component of membrane (GO:0016021);;	K23877|4.9e-39|cpap:110825055|K23877 xyloglucan O-acetyltransferase | (RefSeq) protein ALTERED XYLOGLUCAN 4	--	--	--	GDSL/SGNH-like Acyl-Esterase family found in Pmr5 and Cas1p	Protein trichome birefringence OS=Arabidopsis thaliana OX=3702 GN=TBR PE=1 SV=1	S	Function unknown	PREDICTED: protein trichome birefringence-like 36 [Nelumbo nucifera]
Nn3g21463	--	--	Molecular Function: ligase activity (GO:0016874);;	K16275|1.6e-75|nnu:104598961|K16275 E3 ubiquitin-protein ligase BAH [EC:2.3.2.27] | (RefSeq) probable E3 ubiquitin-protein ligase BAH1-like 2	--	--	--	--	Probable E3 ubiquitin-protein ligase BAH1-like 1 OS=Oryza sativa subsp. indica OX=39946 GN=OsI_27296 PE=3 SV=1	O	Posttranslational modification, protein turnover, chaperones	PREDICTED: probable E3 ubiquitin-protein ligase BAH1-like 2 [Nelumbo nucifera]
Nn7g36745	--	--	Molecular Function: nucleic acid binding (GO:0003676);; Molecular Function: RNA-DNA hybrid ribonuclease activity (GO:0004523);;	--	--	--	--	Reverse transcriptase-like	--	E	Amino acid transport and metabolism	--
Nn2g14707	--	--	--	--	--	--	--	--	--	U	Intracellular trafficking, secretion, and vesicular transport	--
Nn4g24436	--	--	Molecular Function: protein binding (GO:0005515);; Biological Process: cell communication (GO:0007154);; Biological Process: signal transduction (GO:0007165);; Biological Process: phototransduction (GO:0007602);; Biological Process: biological_process (GO:0008150);; Biological Process: response to radiation (GO:0009314);; Biological Process: response to light stimulus (GO:0009416);; Biological Pr…	--	--	[R]	General function prediction only	F-box domain	F-box protein AFR OS=Arabidopsis thaliana OX=3702 GN=AFR PE=1 SV=2	S	Function unknown	PREDICTED: F-box protein AFR-like [Nelumbo nucifera]
Nn2g13627	[J]	Translation, ribosomal structure and biogenesis	Molecular Function: structural constituent of ribosome (GO:0003735);; Cellular Component: ribosome (GO:0005840);; Biological Process: translation (GO:0006412);;	K02926|2.8e-160|nnu:104601218|K02926 large subunit ribosomal protein L4 | (RefSeq) 50S ribosomal protein L4, chloroplastic-like	Ribosome (ko03010)	[J]	Translation, ribosomal structure and biogenesis	Ribosomal protein L4/L1 family	50S ribosomal protein L4, chloroplastic OS=Arabidopsis thaliana OX=3702 GN=RPL4 PE=2 SV=2	J	Translation, ribosomal structure and biogenesis	PREDICTED: 50S ribosomal protein L4, chloroplastic-like [Nelumbo nucifera]
Nn4g23933	--	--	--	--	--	--	--	--	--	--	--	PREDICTED: uncharacterized protein LOC104602699 [Nelumbo nucifera]
Nn1g01856	--	--	Molecular Function: MAP kinase activity (GO:0004707);; Molecular Function: ATP binding (GO:0005524);;	K20536|2.0e-07|nnu:104594741|K20536 mitogen-activated protein kinase 3 [EC:2.7.11.24] | (RefSeq) mitogen-activated protein kinase 3-like	MAPK signaling pathway - plant (ko04016);; Plant-pathogen interaction (ko04626)	[T]	Signal transduction mechanisms	--	Mitogen-activated protein kinase 5 OS=Oryza sativa subsp. indica OX=39946 GN=MPK5 PE=1 SV=2	--	--	Mitogen-activated protein kinase [Actinidia chinensis var. chinensis]
Nn1g01491	--	--	Molecular Function: AT DNA binding (GO:0003680);; Cellular Component: nucleus (GO:0005634);;	--	--	--	--	Plants and Prokaryotes Conserved (PCC) domain	AT-hook motif nuclear-localized protein 11 OS=Arabidopsis thaliana OX=3702 GN=AHL11 PE=2 SV=1	K	Transcription	PREDICTED: AT-hook motif nuclear-localized protein 9-like [Nelumbo nucifera]
Nn6g32055	[G]	Carbohydrate transport and metabolism	Molecular Function: magnesium ion binding (GO:0000287);; Molecular Function: pyruvate kinase activity (GO:0004743);; Molecular Function: kinase activity (GO:0016301);; Molecular Function: potassium ion binding (GO:0030955);;	K00873|0.0e+00|nnu:104604215|K00873 pyruvate kinase [EC:2.7.1.40] | (RefSeq) pyruvate kinase isozyme A, chloroplastic-like	Glycolysis / Gluconeogenesis (ko00010);; Purine metabolism (ko00230);; Pyruvate metabolism (ko00620);; Carbon metabolism (ko01200);; Biosynthesis of amino acids (ko01230)	[G]	Carbohydrate transport and metabolism	Pyruvate kinase, barrel domain	Pyruvate kinase isozyme A, chloroplastic OS=Ricinus communis OX=3988 PE=1 SV=1	G	Carbohydrate transport and metabolism	PREDICTED: pyruvate kinase isozyme A, chloroplastic-like [Nelumbo nucifera]
Nn6g34449	--		Molecular Function: protein kinase activity (GO:0004672);; Molecular Function: ATP binding (GO:0005524);; Cellular Component: integral component of membrane (GO:0016021);;	K13416|5.8e-72|han:110928984|K13416 brassinosteroid insensitive 1-associated receptor kinase 1 [EC:2.7.10.1 2.7.11.1] | (RefSeq) BRASSINOSTEROID INSENSITIVE 1-associated receptor kinase 1-like isoform X1	MAPK signaling pathway - plant (ko04016);; Plant hormone signal transduction (ko04075);; Plant-pathogen interaction (ko04626)	--	--	Protein tyrosine and serine/threonine kinase	Probable LRR receptor-like serine/threonine-protein kinase At1g53440 OS=Arabidopsis thaliana OX=3702 GN=At1g53440 PE=2 SV=2	T	Signal transduction mechanisms	PREDICTED: probable LRR receptor-like serine/threonine-protein kinase At1g53440 [Nelumbo nucifera]
Nn5g30912	--	--	--	--	--	--	--	Arabidopsis protein of unknown function	--	S	Function unknown	PREDICTED: uncharacterized protein LOC104603719 [Nelumbo nucifera]
Nn1g00907	--	--	Cellular Component: mitochondrial inner membrane presequence translocase complex (GO:0005744);; Cellular Component: integral component of membrane (GO:0016021);; Biological Process: protein import into mitochondrial matrix (GO:0030150);;	K17796|3.0e-64|nnu:104598698|K17796 mitochondrial import inner membrane translocase subunit TIM21 | (RefSeq) probable mitochondrial import inner membrane translocase subunit TIM21	--	--	--	TIM21	Probable mitochondrial import inner membrane translocase subunit TIM21 OS=Arabidopsis thaliana OX=3702 GN=TIM21 PE=1 SV=1	O	Posttranslational modification, protein turnover, chaperones	PREDICTED: probable mitochondrial import inner membrane translocase subunit TIM21 [Nelumbo nucifera]
Nelumbo_nucifera_newGene_3176	--	--	Molecular Function: nucleic acid binding (GO:0003676);; Biological Process: DNA integration (GO:0015074);;	K12349|2.0e-34|ccaj:109806181|K12349 neutral ceramidase [EC:3.5.1.23] | (RefSeq) neutral ceramidase-like	Sphingolipid metabolism (ko00600)	[R]	General function prediction only	Integrase zinc binding domain	--	E	Amino acid transport and metabolism	hypothetical protein TSUD_162140 [Trifolium subterraneum]
Nn6g34342	--		Molecular Function: protein kinase activity (GO:0004672);; Molecular Function: ATP binding (GO:0005524);;	K00924|6.3e-20|zma:103629817|K00924 kinase [EC:2.7.1.-] | (RefSeq) receptor-like protein kinase 5	--	[T]	Signal transduction mechanisms	Protein kinase domain	Receptor-like serine/threonine-protein kinase At4g25390 OS=Arabidopsis thaliana OX=3702 GN=At4g25390 PE=2 SV=1	T	Signal transduction mechanisms	PREDICTED: receptor-like serine/threonine-protein kinase At2g45590 [Nelumbo nucifera]
Nn5g30847	--	--	--	--	--	--	--	--	--	--	--	PREDICTED: uncharacterized protein LOC104604312 [Nelumbo nucifera]
Nn157s44336	--	--	--	--	--	--	--	--	--	--	--	hypothetical protein CICLE_v10029531mg [Citrus clementina]
Nn2g11807	--	--	Biological Process: metal ion transport (GO:0030001);; Molecular Function: metal ion binding (GO:0046872);;	K14292|3.7e-18|spen:107013477|K14292 trimethylguanosine synthase [EC:2.1.1.-] | (RefSeq) trimethylguanosine synthase	RNA transport (ko03013)	[P]	Inorganic ion transport and metabolism	Heavy-metal-associated domain	Protein SODIUM POTASSIUM ROOT DEFECTIVE 2 OS=Arabidopsis thaliana OX=3702 GN=NAKR2 PE=2 SV=1	P	Inorganic ion transport and metabolism	PREDICTED: uncharacterized protein LOC104595243 [Nelumbo nucifera]
Nn5g28652	--	--	Cellular Component: integral component of membrane (GO:0016021);;	--	--	[S]	Function unknown	--	--	S	Function unknown	PREDICTED: uncharacterized protein C57A10.07 [Nelumbo nucifera]
Nn3g17461	--	--	Biological Process: signal transduction (GO:0007165);;	--	--	--	--	Ethylene-responsive binding factor-associated repression	Ninja-family protein AFP2 OS=Arabidopsis thaliana OX=3702 GN=AFP2 PE=1 SV=1	S	Function unknown	PREDICTED: ninja-family protein AFP3-like [Nelumbo nucifera]
Nn3g21661	[C]	Energy production and conversion	Molecular Function: electron carrier activity (GO:0009055);; Molecular Function: 2 iron, 2 sulfur cluster binding (GO:0051537);;	K22071|1.3e-105|nnu:104598811|K22071 ferredoxin-2, mitochondrial | (RefSeq) 2Fe-2S ferredoxin-like	--	[C]	Energy production and conversion	2Fe-2S iron-sulfur cluster binding domain	Adrenodoxin-like protein 2, mitochondrial OS=Arabidopsis thaliana OX=3702 GN=MFDX2 PE=2 SV=1	C	Energy production and conversion	PREDICTED: uncharacterized protein LOC104598811 isoform X1 [Nelumbo nucifera]
Nn1g05352	--	--	Biological Process: reproduction (GO:0000003);; Cellular Component: nuclear chromosome (GO:0000228);; Biological Process: nuclear division (GO:0000280);; Cellular Component: condensed chromosome (GO:0000793);; Cellular Component: condensed nuclear chromosome (GO:0000794);; Cellular Component: synaptonemal complex (GO:0000795);; Cellular Component: transverse filament (GO:0000802);; Cellular Compo…	K04077|4.7e-35|boe:106343980|K04077 chaperonin GroEL | (RefSeq) uncharacterized protein LOC106343980	RNA degradation (ko03018)	--	--	--	Synaptonemal complex protein 1 OS=Arabidopsis thaliana OX=3702 GN=ZYP1A PE=2 SV=1	S	Function unknown	PREDICTED: synaptonemal complex protein 1-like [Nelumbo nucifera]
Nn5g27971	--	--	Molecular Function: protein kinase activity (GO:0004672);; Molecular Function: ATP binding (GO:0005524);;	K20605|1.0e-167|nnu:104588734|K20605 mitogen-activated protein kinase kinase kinase 2 [EC:2.7.11.25] | (RefSeq) mitogen-activated protein kinase kinase kinase 1-like	MAPK signaling pathway - plant (ko04016)	[T]	Signal transduction mechanisms	Protein kinase domain	Mitogen-activated protein kinase kinase kinase 1 OS=Arabidopsis thaliana OX=3702 GN=MEKK1 PE=1 SV=2	T	Signal transduction mechanisms	PREDICTED: mitogen-activated protein kinase kinase kinase 1-like isoform X2 [Nelumbo nucifera]
Nn2g13480	[DZ]	Cell cycle control, cell division, chromosome partitioning;; Cytoskeleton	--	--	--	[S]	Function unknown	Regulator of chromosome condensation (RCC1) repeat	Ultraviolet-B receptor UVR8 OS=Arabidopsis thaliana OX=3702 GN=UVR8 PE=1 SV=1	I	Lipid transport and metabolism	PREDICTED: LOW QUALITY PROTEIN: ultraviolet-B receptor UVR8 [Nelumbo nucifera]
Nn4g24989	--	--	Cellular Component: cellular_component (GO:0005575);; Cellular Component: intracellular (GO:0005622);; Cellular Component: cell (GO:0005623);; Cellular Component: cytoplasm (GO:0005737);; Cellular Component: peroxisome (GO:0005777);; Biological Process: organelle organization (GO:0006996);; Biological Process: biological_process (GO:0008150);; Biological Process: plastid organization (GO:0009657)…	--	--	--	--	--	--	S	Function unknown	PREDICTED: QWRF motif-containing protein 2 [Nelumbo nucifera]
Nn4g26584	--	--	Cellular Component: cellular_component (GO:0005575);; Cellular Component: intracellular (GO:0005622);; Cellular Component: cell (GO:0005623);; Cellular Component: cytoplasm (GO:0005737);; Cellular Component: vacuole (GO:0005773);; Cellular Component: vacuolar membrane (GO:0005774);; Cellular Component: endoplasmic reticulum (GO:0005783);; Cellular Component: Golgi apparatus (GO:0005794);; Cellula…	--	--	--	--	--	--	O	Posttranslational modification, protein turnover, chaperones	--
Nn6g34430	--	--	Biological Process: immune system process (GO:0002376);; Biological Process: response to stress (GO:0006950);; Biological Process: defense response (GO:0006952);; Biological Process: immune response (GO:0006955);; Biological Process: biological_process (GO:0008150);; Biological Process: cell death (GO:0008219);; Biological Process: plant-type hypersensitive response (GO:0009626);; Biological Proc…	--	--	--	--	--	MACPF domain-containing protein CAD1 OS=Arabidopsis thaliana OX=3702 GN=CAD1 PE=2 SV=1	S	Function unknown	PREDICTED: MACPF domain-containing protein CAD1-like [Nelumbo nucifera]
Nn1g03384	[G]	Carbohydrate transport and metabolism	Molecular Function: cellulase activity (GO:0008810);; Biological Process: cellulose catabolic process (GO:0030245);;	K01179|2.0e-186|cmo:103482819|K01179 endoglucanase [EC:3.2.1.4] | (RefSeq) endoglucanase 6-like	Starch and sucrose metabolism (ko00500)	--	--	Glycosyl hydrolase family 9	Endoglucanase 11 OS=Arabidopsis thaliana OX=3702 GN=At2g32990 PE=2 SV=1	G	Carbohydrate transport and metabolism	PREDICTED: endoglucanase 11-like [Nelumbo nucifera]
Nn1g09429	--	--	--	--	--	--	--	Mitochondrial ribosomal protein subunit L20	Protein GAMETE CELL DEFECTIVE 1, mitochondrial OS=Oryza sativa subsp. japonica OX=39947 GN=GCD1 PE=2 SV=1	S	Function unknown	PREDICTED: uncharacterized protein LOC104612184 [Nelumbo nucifera]
Nn3g19447	--	--	--	--	--	--	--	Tetratricopeptide repeat	--	--	--	PREDICTED: uncharacterized protein LOC104609599 [Nelumbo nucifera]
Nn6g35712	--	--	Molecular Function: structural constituent of ribosome (GO:0003735);; Cellular Component: ribosome (GO:0005840);; Biological Process: translation (GO:0006412);;	K02883|4.8e-98|nnu:104609266|K02883 large subunit ribosomal protein L18e | (RefSeq) 60S ribosomal protein L18-2-like	Ribosome (ko03010)	[J]	Translation, ribosomal structure and biogenesis	Ribosomal protein 60S L18 and 50S L18e	60S ribosomal protein L18-2 OS=Arabidopsis thaliana OX=3702 GN=RPL18B PE=1 SV=2	J	Translation, ribosomal structure and biogenesis	PREDICTED: 60S ribosomal protein L18-2-like [Nelumbo nucifera]
Nn2g13420	--	--	Molecular Function: DNA binding (GO:0003677);; Cellular Component: nucleus (GO:0005634);;	K14491|1.1e-21|cmax:111498799|K14491 two-component response regulator ARR-B family | (RefSeq) two-component response regulator ARR12 isoform X1	Plant hormone signal transduction (ko04075)	--	--	Myb-like DNA-binding domain	Transcription factor BOA OS=Arabidopsis thaliana OX=3702 GN=BOA PE=2 SV=1	K	Transcription	PREDICTED: transcription factor PCL1-like [Nelumbo nucifera]
Nn1g04440	--	--	Molecular Function: oxidoreductase activity, acting on single donors with incorporation of molecular oxygen, incorporation of two atoms of oxygen (GO:0016702);;	K23953|6.2e-12|nnu:104609783|K23953 plant cysteine oxidase [EC:1.13.11.-] | (RefSeq) plant cysteine oxidase 5-like	--	--	--	--	Plant cysteine oxidase 4 OS=Arabidopsis thaliana OX=3702 GN=PCO4 PE=1 SV=2	S	Function unknown	PREDICTED: plant cysteine oxidase 5-like [Nelumbo nucifera]
Nn1g09501	--	--	Molecular Function: translation elongation factor activity (GO:0003746);; Cellular Component: nucleus (GO:0005634);; Molecular Function: metal ion binding (GO:0046872);;	--	--	[S]	Function unknown	Transcription elongation factor Elf1 like	Transcription elongation factor 1 homolog OS=Oryza sativa subsp. japonica OX=39947 GN=Os07g0631100 PE=3 SV=1	K	Transcription	transcription elongation factor 1 homolog [Amborella trichopoda]
Nn2g13945	--	--	Molecular Function: translation initiation factor activity (GO:0003743);;	K03236|3.3e-24|nnu:104606539|K03236 translation initiation factor 1A | (RefSeq) eukaryotic translation initiation factor 1A	RNA transport (ko03013)	[J]	Translation, ribosomal structure and biogenesis	Translation initiation factor 1A / IF-1	Eukaryotic translation initiation factor 1A OS=Triticum aestivum OX=4565 PE=1 SV=2	J	Translation, ribosomal structure and biogenesis	PREDICTED: eukaryotic translation initiation factor 1A [Nelumbo nucifera]
Nn7g36922	--	--	--	K14638|3.4e-11|pmum:103330861|K14638 solute carrier family 15 (peptide/histidine transporter), member 3/4 | (RefSeq) protein NRT1/ PTR FAMILY 5.4-like	--	--	--	Regulator of Ty1 transposition protein 107 BRCT domain	--	S	Function unknown	PREDICTED: uncharacterized protein LOC104607858 isoform X1 [Nelumbo nucifera]
Nn5g27148	--	--	Molecular Function: DNA binding (GO:0003677);;	K15777|2.2e-74|mesc:110630336|K15777 4,5-DOPA dioxygenase extradiol [EC:1.13.11.-] | (RefSeq) uncharacterized protein LOC110630336	Betalain biosynthesis (ko00965)	--	--	ZF-HD protein dimerisation region	Zinc-finger homeodomain protein 4 OS=Arabidopsis thaliana OX=3702 GN=ZHD4 PE=1 SV=1	K	Transcription	PREDICTED: zinc-finger homeodomain protein 4 [Nelumbo nucifera]
Nn3g18943	--	--	Molecular Function: nucleic acid binding (GO:0003676);; Molecular Function: RNA-DNA hybrid ribonuclease activity (GO:0004523);;	--	--	--	--	Reverse transcriptase-like	--	--	--	--
Nn431s46643	--	--	--	--	--	--	--	--	--	S	Function unknown	hypothetical protein VITISV_022569 [Vitis vinifera]
Nn143s44071	--	--	--	--	--	--	--	--	--	S	Function unknown	hypothetical protein GOBAR_AA32096 [Gossypium barbadense]
Nn1g07167	[EH]	Amino acid transport and metabolism;; Coenzyme transport and metabolism	Molecular Function: oxidoreductase activity, acting on a sulfur group of donors, disulfide as acceptor (GO:0016671);; Biological Process: sulfate reduction (GO:0019419);;	K05907|7.1e-170|nnu:104612772|K05907 adenylyl-sulfate reductase (glutathione) [EC:1.8.4.9] | (RefSeq) 5'-adenylylsulfate reductase 3, chloroplastic-like	Sulfur metabolism (ko00920)	[E]	Amino acid transport and metabolism	Phosphoadenosine phosphosulfate reductase family	5'-adenylylsulfate reductase 3, chloroplastic OS=Arabidopsis thaliana OX=3702 GN=APR3 PE=2 SV=2	--	--	PREDICTED: 5'-adenylylsulfate reductase 3, chloroplastic-like [Nelumbo nucifera]
Nelumbo_nucifera_newGene_1618	--	--	Cellular Component: plant-type vacuole (GO:0000325);; Molecular Function: molecular_function (GO:0003674);; Molecular Function: nucleic acid binding (GO:0003676);; Molecular Function: catalytic activity (GO:0003824);; Molecular Function: phosphoenolpyruvate carboxykinase (ATP) activity (GO:0004612);; Molecular Function: transporter activity (GO:0005215);; Molecular Function: ATP binding (GO:00055…	K01147|8.0e-35|vra:106774033|K01147 exoribonuclease II [EC:3.1.13.1] | (RefSeq) uncharacterized protein LOC106774033	--	[R]	General function prediction only	--	--	Q	Secondary metabolites biosynthesis, transport and catabolism	uncharacterized protein LOC113697007 isoform X1 [Coffea arabica]
Nn6g31679	--	--	Cellular Component: cellular_component (GO:0005575);; Cellular Component: intracellular (GO:0005622);; Cellular Component: cell (GO:0005623);; Cellular Component: cytoplasm (GO:0005737);; Biological Process: biological_process (GO:0008150);; Cellular Component: chloroplast (GO:0009507);; Cellular Component: plastid stroma (GO:0009532);; Cellular Component: plastid (GO:0009536);; Cellular Componen…	--	--	--	--	Domain of unknown function (DUF1995)	Protein LOW PSII ACCUMULATION 3, chloroplastic OS=Arabidopsis thaliana OX=3702 GN=LPA3 PE=1 SV=1	S	Function unknown	PREDICTED: protein LOW PSII ACCUMULATION 3, chloroplastic isoform X1 [Nelumbo nucifera]
Nn1g01691	--	--	Molecular Function: transcription factor activity, sequence-specific DNA binding (GO:0003700);; Cellular Component: nucleus (GO:0005634);; Molecular Function: sequence-specific DNA binding (GO:0043565);;	K12835|3.1e-25|cmax:111493042|K12835 ATP-dependent RNA helicase DDX42 [EC:3.6.4.13] | (RefSeq) DEAD-box ATP-dependent RNA helicase 24 isoform X1	Spliceosome (ko03040)	--	--	WRKY DNA -binding domain	Probable WRKY transcription factor 43 OS=Arabidopsis thaliana OX=3702 GN=WRKY43 PE=1 SV=1	K	Transcription	PREDICTED: probable WRKY transcription factor 43 [Nelumbo nucifera]
Nn1g06289	--	--	Molecular Function: DNA binding (GO:0003677);; Cellular Component: nucleus (GO:0005634);; Biological Process: regulation of transcription, DNA-templated (GO:0006355);;	K00521|5.6e-24|cmos:111447866|K00521 ferric-chelate reductase [EC:1.16.1.7] | (RefSeq) ferric reduction oxidase 7, chloroplastic-like	--	--	--	No apical meristem (NAM) protein	NAC domain-containing protein 104 OS=Arabidopsis thaliana OX=3702 GN=NAC104 PE=2 SV=1	K	Transcription	PREDICTED: NAC domain-containing protein 104-like [Nelumbo nucifera]
Nn5g28583	[J]	Translation, ribosomal structure and biogenesis	Molecular Function: nucleic acid binding (GO:0003676);; Molecular Function: asparagine-tRNA ligase activity (GO:0004816);; Molecular Function: ATP binding (GO:0005524);; Biological Process: asparaginyl-tRNA aminoacylation (GO:0006421);;	K01893|0.0e+00|nnu:104606762|K01893 asparaginyl-tRNA synthetase [EC:6.1.1.22] | (RefSeq) asparagine--tRNA ligase, cytoplasmic 1-like	Aminoacyl-tRNA biosynthesis (ko00970)	[J]	Translation, ribosomal structure and biogenesis	tRNA synthetases class II (D, K and N)	Asparagine--tRNA ligase, cytoplasmic 1 OS=Arabidopsis thaliana OX=3702 GN=SYNC1 PE=1 SV=1	J	Translation, ribosomal structure and biogenesis	PREDICTED: asparagine--tRNA ligase, cytoplasmic 1-like [Nelumbo nucifera]
Nn7g37698	[R]	General function prediction only	Molecular Function: oxidoreductase activity (GO:0016491);;	K18208|6.0e-57|nnu:104598324|K18208 renalase [EC:1.6.3.5] | (RefSeq) uncharacterized LOC104598324	--	--	--	NAD(P)-binding Rossmann-like domain	--	S	Function unknown	PREDICTED: uncharacterized protein LOC104598324 isoform X1 [Nelumbo nucifera]
Nn2g11509	--	--	Molecular Function: transferase activity (GO:0016740);;	--	--	[R]	General function prediction only	Glycosyl transferase family 90	--	S	Function unknown	PREDICTED: O-glucosyltransferase rumi homolog isoform X1 [Nelumbo nucifera]
Nn1g09662	--	--	Cellular Component: nucleus (GO:0005634);; Cellular Component: cytoplasm (GO:0005737);; Biological Process: protein transport (GO:0015031);; Molecular Function: ribosomal large subunit binding (GO:0043023);;	K07562|1.2e-299|nnu:104605227|K07562 nonsense-mediated mRNA decay protein 3 | (RefSeq) 60S ribosomal export protein NMD3	Ribosome biogenesis in eukaryotes (ko03008);; RNA transport (ko03013)	[J]	Translation, ribosomal structure and biogenesis	NMD3 family	--	J	Translation, ribosomal structure and biogenesis	PREDICTED: 60S ribosomal export protein NMD3 [Nelumbo nucifera]
Nn3g17089	--	--	Cellular Component: membrane (GO:0016020);; Molecular Function: transferase activity (GO:0016740);;	K20891|3.4e-255|nnu:104596429|K20891 beta-glucuronosyltransferase [EC:2.4.1.-] | (RefSeq) beta-glucuronosyltransferase GlcAT14B-like	--	[G]	Carbohydrate transport and metabolism	Core-2/I-Branching enzyme	Beta-glucuronosyltransferase GlcAT14A OS=Arabidopsis thaliana OX=3702 GN=GLCAT14A PE=2 SV=1	G	Carbohydrate transport and metabolism	PREDICTED: beta-glucuronosyltransferase GlcAT14B-like [Nelumbo nucifera]
Nn227s45460	--	--	--	--	--	--	--	--	--	--	--	hypothetical protein CQW23_34295 [Capsicum baccatum]
Nn3g19890	[G]	Carbohydrate transport and metabolism	Molecular Function: pectate lyase activity (GO:0030570);; Biological Process: pectin catabolic process (GO:0045490);; Molecular Function: metal ion binding (GO:0046872);;	K01728|5.2e-259|nnu:104602148|K01728 pectate lyase [EC:4.2.2.2] | (RefSeq) probable pectate lyase 8	Pentose and glucuronate interconversions (ko00040)	--	--	Pectate lyase	Probable pectate lyase 8 OS=Arabidopsis thaliana OX=3702 GN=At3g07010 PE=2 SV=1	G	Carbohydrate transport and metabolism	PREDICTED: probable pectate lyase 8 [Nelumbo nucifera]
Nn2g14441	--	--	Molecular Function: protein binding (GO:0005515);;	--	--	--	--	SAM domain (Sterile alpha motif)	--	S	Function unknown	PREDICTED: uncharacterized protein LOC104601481 [Nelumbo nucifera]
Nn1g05273	[P]	Inorganic ion transport and metabolism	Molecular Function: secondary active sulfate transmembrane transporter activity (GO:0008271);; Cellular Component: integral component of membrane (GO:0016021);;	K17470|0.0e+00|nnu:104605925|K17470 sulfate transporter 1, high-affinity | (RefSeq) sulfate transporter 1.2-like	--	[P]	Inorganic ion transport and metabolism	Sulfate permease family	Sulfate transporter 1.2 OS=Arabidopsis thaliana OX=3702 GN=SULTR1;2 PE=1 SV=1	P	Inorganic ion transport and metabolism	PREDICTED: sulfate transporter 1.2-like [Nelumbo nucifera]
Nn3g16769	--	--	--	K07512|1.7e-15|csat:109124554|K07512 mitochondrial enoyl-[acyl-carrier protein] reductase / trans-2-enoyl-CoA reductase [EC:1.3.1.- 1.3.1.38] | (RefSeq) probable trans-2-enoyl-CoA reductase, mitochondrial	Fatty acid biosynthesis (ko00061);; Fatty acid elongation (ko00062);; Fatty acid metabolism (ko01212)	--	--	--	--	--	--	PREDICTED: probable trans-2-enoyl-CoA reductase, mitochondrial [Nelumbo nucifera]
Nn3g16239	[P]	Inorganic ion transport and metabolism	Molecular Function: potassium ion transmembrane transporter activity (GO:0015079);; Cellular Component: integral component of membrane (GO:0016021);;	K03549|0.0e+00|nnu:104592715|K03549 KUP system potassium uptake protein | (RefSeq) potassium transporter 4	--	--	--	K+ potassium transporter	Potassium transporter 4 OS=Arabidopsis thaliana OX=3702 GN=POT4 PE=1 SV=2	P	Inorganic ion transport and metabolism	PREDICTED: potassium transporter 4 [Nelumbo nucifera]
Nn6g35218	--	--	Molecular Function: DNA binding (GO:0003677);; Cellular Component: nucleus (GO:0005634);; Biological Process: regulation of transcription, DNA-templated (GO:0006355);; Cellular Component: integral component of membrane (GO:0016021);;	K00521|2.2e-37|cmos:111447866|K00521 ferric-chelate reductase [EC:1.16.1.7] | (RefSeq) ferric reduction oxidase 7, chloroplastic-like	--	--	--	No apical meristem (NAM) protein	NAC domain-containing protein 53 OS=Arabidopsis thaliana OX=3702 GN=NAC053 PE=2 SV=1	P	Inorganic ion transport and metabolism	PREDICTED: NAC domain-containing protein 53 [Nelumbo nucifera]
Nn1g01213	--	--	--	--	--	--	--	--	--	--	--	PREDICTED: uncharacterized protein LOC104611850 [Nelumbo nucifera]
Nn1g06294	--	--	Molecular Function: protein binding (GO:0005515);;	K14962|2.6e-152|nnu:104599549|K14962 COMPASS component SWD2 | (RefSeq) WD repeat-containing protein 82-B	mRNA surveillance pathway (ko03015)	[ABO]	RNA processing and modification;; Chromatin structure and dynamics;; Posttranslational modification, protein turnover, chaperones	WD domain, G-beta repeat	Protein ANTHESIS POMOTING FACTOR 1 OS=Arabidopsis thaliana OX=3702 GN=APRF1 PE=2 SV=1	--	--	PREDICTED: WD repeat-containing protein 82-B isoform X2 [Nelumbo nucifera]
Nn5g28100	--	--	--	--	--	--	--	--	F-box/LRR-repeat protein At3g26922 OS=Arabidopsis thaliana OX=3702 GN=At3g26922 PE=2 SV=2	--	--	PREDICTED: uncharacterized protein LOC104608544 [Nelumbo nucifera]
Nn7g37645	--	--	Cellular Component: mitochondrion (GO:0005739);; Molecular Function: heme transporter activity (GO:0015232);; Cellular Component: membrane (GO:0016020);; Biological Process: cytochrome complex assembly (GO:0017004);;	--	--	--	--	--	Putative cytochrome c biogenesis ccmB-like mitochondrial protein OS=Arabidopsis thaliana OX=3702 GN=CCMB PE=2 SV=2	--	--	cytochrome c biogenesis ccmB, partial [Eschscholzia californica]
Nn6g33220	--	--	--	--	--	--	--	--	--	--	--	unnamed protein product [Prunus armeniaca]
Nn242s45717	--	--	--	--	--	--	--	--	--	--	--	unnamed protein product [Prunus armeniaca]
Nelumbo_nucifera_newGene_1403	--	--	--	K12667|8.1e-45|qsu:112019243|K12667 oligosaccharyltransferase complex subunit delta (ribophorin II) | (RefSeq) dolichyl-diphosphooligosaccharide--protein glycosyltransferase subunit 2	N-Glycan biosynthesis (ko00510);; Various types of N-glycan biosynthesis (ko00513);; Protein processing in endoplasmic reticulum (ko04141)	[R]	General function prediction only	--	--	L	Replication, recombination and repair	hypothetical protein VITISV_020730 [Vitis vinifera]
Nn7g38146	[L]	Replication, recombination and repair	Molecular Function: nucleic acid binding (GO:0003676);; Molecular Function: helicase activity (GO:0004386);; Molecular Function: ATP binding (GO:0005524);;	K14777|1.0e-238|nnu:104610987|K14777 ATP-dependent RNA helicase DDX47/RRP3 [EC:3.6.4.13] | (RefSeq) DEAD-box ATP-dependent RNA helicase 10	--	[A]	RNA processing and modification	DEAD/DEAH box helicase	DEAD-box ATP-dependent RNA helicase 10 OS=Arabidopsis thaliana OX=3702 GN=RH10 PE=1 SV=2	A	RNA processing and modification	PREDICTED: DEAD-box ATP-dependent RNA helicase 10 [Nelumbo nucifera]
Nn6g32664	--	--	--	--	--	--	--	--	--	--	--	predicted protein [Micromonas pusilla CCMP1545]
Nn1g00510	--	--	--	--	--	[O]	Posttranslational modification, protein turnover, chaperones	--	Probable E3 ubiquitin-protein ligase HIP1 OS=Oryza sativa subsp. japonica OX=39947 GN=HIP1 PE=1 SV=2	O	Posttranslational modification, protein turnover, chaperones	PREDICTED: E3 ubiquitin-protein ligase MBR2-like [Nelumbo nucifera]
Nn1g02985	--	--	Molecular Function: ubiquitin-protein transferase activity (GO:0004842);;	--	--	--	--	--	--	O	Posttranslational modification, protein turnover, chaperones	PREDICTED: E3 ubiquitin-protein ligase UPL5-like [Nelumbo nucifera]
Nn8g39750	--	--	Molecular Function: lipid binding (GO:0008289);;	--	--	--	--	Protein of unknown function (DUF1336)	Protein ENHANCED DISEASE RESISTANCE 2-like OS=Arabidopsis thaliana OX=3702 GN=EDR2L PE=2 SV=1	T	Signal transduction mechanisms	PREDICTED: protein ENHANCED DISEASE RESISTANCE 2-like isoform X3 [Nelumbo nucifera]
Nn1g04044	--	--	Cellular Component: integral component of membrane (GO:0016021);;	--	--	--	--	--	Tetraspanin-19 OS=Arabidopsis thaliana OX=3702 GN=TOM2AH3 PE=2 SV=1	--	--	PREDICTED: tetraspanin-19 isoform X2 [Nelumbo nucifera]
Nn167s44461	--	--	--	--	--	--	--	--	--	--	--	hypothetical protein D0Y65_055488 [Glycine soja]
Nn2g11286	--	--	Cellular Component: integral component of membrane (GO:0016021);;	--	--	--	--	--	--	--	--	PREDICTED: uncharacterized protein LOC104597066 [Nelumbo nucifera]
Nn2g11489	--	--	Molecular Function: nucleic acid binding (GO:0003676);; Molecular Function: RNA-DNA hybrid ribonuclease activity (GO:0004523);;	--	--	--	--	Reverse transcriptase-like	--	--	--	--
Nn7g36448	--	--	Cellular Component: apoplast (GO:0048046);;	K01870|2.2e-39|csat:104723377|K01870 isoleucyl-tRNA synthetase [EC:6.1.1.5] | (RefSeq) isoleucine--tRNA ligase, chloroplastic/mitochondrial-like	Aminoacyl-tRNA biosynthesis (ko00970)	--	--	Dirigent-like protein	Dirigent protein 3 OS=Arabidopsis thaliana OX=3702 GN=DIR3 PE=3 SV=1	S	Function unknown	PREDICTED: dirigent protein 22-like [Nelumbo nucifera]
Nn2g15553	--	--	Molecular Function: molecular_function (GO:0003674);; Molecular Function: enzyme inhibitor activity (GO:0004857);; Molecular Function: protein binding (GO:0005515);; Cellular Component: cellular_component (GO:0005575);; Cellular Component: cell wall (GO:0005618);; Cellular Component: intracellular (GO:0005622);; Cellular Component: cell (GO:0005623);; Cellular Component: cytoplasm (GO:0005737);; …	K01188|2.8e-18|sita:101778196|K01188 beta-glucosidase [EC:3.2.1.21] | (RefSeq) beta-glucosidase 12	Cyanoamino acid metabolism (ko00460);; Starch and sucrose metabolism (ko00500);; Phenylpropanoid biosynthesis (ko00940)	--	--	Leucine rich repeat	Polygalacturonase inhibitor OS=Vitis vinifera OX=29760 GN=pgip PE=1 SV=1	S	Function unknown	PREDICTED: polygalacturonase inhibitor-like [Nelumbo nucifera]
Nn1g07372	--	--	Molecular Function: calcium ion binding (GO:0005509);;	--	--	--	--	--	--	S	Function unknown	PREDICTED: uncharacterized protein LOC104594158 [Nelumbo nucifera]
Nn2g13008	[HR]	Coenzyme transport and metabolism;; General function prediction only	--	--	--	--	--	--	--	S	Function unknown	PREDICTED: uncharacterized protein LOC104588647 [Nelumbo nucifera]
Nn3g18093	--	--	Molecular Function: 3-hydroxyacyl-CoA dehydrogenase activity (GO:0003857);; Cellular Component: peroxisome (GO:0005777);; Biological Process: fatty acid beta-oxidation (GO:0006635);;	K10527|4.2e-42|nnu:104595160|K10527 enoyl-CoA hydratase/3-hydroxyacyl-CoA dehydrogenase [EC:4.2.1.17 1.1.1.35 1.1.1.211] | (RefSeq) peroxisomal fatty acid beta-oxidation multifunctional protein AIM1	Fatty acid degradation (ko00071);; alpha-Linolenic acid metabolism (ko00592);; Fatty acid metabolism (ko01212)	[I]	Lipid transport and metabolism	--	Peroxisomal fatty acid beta-oxidation multifunctional protein OS=Oryza sativa subsp. japonica OX=39947 GN=MFP PE=1 SV=2	I	Lipid transport and metabolism	PREDICTED: peroxisomal fatty acid beta-oxidation multifunctional protein AIM1 [Nelumbo nucifera]
Nn5g28371	[L]	Replication, recombination and repair	Molecular Function: translation initiation factor activity (GO:0003743);; Molecular Function: ATP binding (GO:0005524);;	K13025|3.3e-52|nnu:104587558|K13025 ATP-dependent RNA helicase [EC:3.6.4.13] | (RefSeq) eukaryotic initiation factor 4A-3	RNA transport (ko03013);; mRNA surveillance pathway (ko03015);; Spliceosome (ko03040)	[J]	Translation, ribosomal structure and biogenesis	DEAD/DEAH box helicase	Eukaryotic initiation factor 4A-III homolog A OS=Oryza sativa subsp. japonica OX=39947 GN=EIF4A3A PE=1 SV=1	A	RNA processing and modification	PREDICTED: eukaryotic initiation factor 4A-3 [Nelumbo nucifera]
Nn5g28912	--	--	Cellular Component: cellular_component (GO:0005575);; Cellular Component: intracellular (GO:0005622);; Cellular Component: cell (GO:0005623);; Cellular Component: nucleus (GO:0005634);; Cellular Component: organelle (GO:0043226);; Cellular Component: membrane-bounded organelle (GO:0043227);; Cellular Component: intracellular organelle (GO:0043229);; Cellular Component: intracellular membrane-boun…	K08332|7.0e-13|pxb:103957411|K08332 vacuolar protein 8 | (RefSeq) U-box domain-containing protein 4-like	--	[S]	Function unknown	Armadillo/beta-catenin-like repeat	--	S	Function unknown	PREDICTED: U-box domain-containing protein 4-like [Nelumbo nucifera]
Nn2g15171	--	--	Cellular Component: cytoplasm (GO:0005737);; Biological Process: ER to Golgi vesicle-mediated transport (GO:0006888);;	K14005|0.0e+00|nnu:104606298|K14005 protein transport protein SEC31 | (RefSeq) protein transport protein SEC31 homolog B-like	Protein processing in endoplasmic reticulum (ko04141)	[U]	Intracellular trafficking, secretion, and vesicular transport	Sec23-binding domain of Sec16	Protein transport protein SEC31 homolog B OS=Arabidopsis thaliana OX=3702 GN=SEC31B PE=1 SV=1	U	Intracellular trafficking, secretion, and vesicular transport	PREDICTED: protein transport protein SEC31 homolog B-like [Nelumbo nucifera]
Nn1g07720	[T]	Signal transduction mechanisms	Molecular Function: protein serine/threonine kinase activity (GO:0004674);; Molecular Function: ATP binding (GO:0005524);; Cellular Component: integral component of membrane (GO:0016021);;	K00924|1.2e-73|smo:SELMODRAFT_83623|K00924 kinase [EC:2.7.1.-] | (RefSeq) hypothetical protein	--	--	--	Leucine rich repeat	LRR receptor-like serine/threonine-protein kinase OS=Arabidopsis thaliana OX=3702 GN=RGI3 PE=1 SV=1	T	Signal transduction mechanisms	PREDICTED: probable LRR receptor-like serine/threonine-protein kinase At4g26540 [Nelumbo nucifera]
Nn5g27171	--	--	Biological Process: RNA splicing (GO:0008380);;	K12846|7.8e-48|nnu:104593927|K12846 U4/U6.U5 tri-snRNP-associated protein 3 | (RefSeq) U4/U6.U5 small nuclear ribonucleoprotein 27 kDa protein-like	Spliceosome (ko03040)	[R]	General function prediction only	U4/U6.U5 small nuclear ribonucleoproteins	--	S	Function unknown	PREDICTED: U4/U6.U5 small nuclear ribonucleoprotein 27 kDa protein-like [Nelumbo nucifera]
Nn5g31103	--	--	Molecular Function: O-methyltransferase activity (GO:0008171);; Biological Process: methylation (GO:0032259);; Molecular Function: protein dimerization activity (GO:0046983);;	K13066|1.8e-34|nnu:104601399|K13066 caffeic acid 3-O-methyltransferase [EC:2.1.1.68] | (RefSeq) caffeic acid 3-O-methyltransferase-like	Phenylpropanoid biosynthesis (ko00940)	[R]	General function prediction only	Dimerisation domain	Caffeic acid 3-O-methyltransferase 1 OS=Populus kitakamiensis OX=34292 GN=HOMT1 PE=3 SV=1	S	Function unknown	PREDICTED: caffeic acid 3-O-methyltransferase-like [Nelumbo nucifera]
Nn2g10613	[O]	Posttranslational modification, protein turnover, chaperones	Biological Process: oxidation-reduction process (GO:0055114);;	K10878|1.2e-88|zju:107432915|K10878 meiotic recombination protein SPO11 | (RefSeq) DNA topoisomerase 6 subunit A-like	--	[S]	Function unknown	AhpC/TSA antioxidant enzyme	Thioredoxin-like protein AAED1, chloroplastic OS=Arabidopsis thaliana OX=3702 GN=At2g37240 PE=1 SV=2	O	Posttranslational modification, protein turnover, chaperones	PREDICTED: thioredoxin-like protein AAED1, chloroplastic [Nelumbo nucifera]
Nn1g00230	--	--	Molecular Function: GTPase activity (GO:0003924);; Molecular Function: GTP binding (GO:0005525);;	K17065|7.1e-97|gsl:Gasu_23230|K17065 dynamin 1-like protein [EC:3.6.5.5] | (RefSeq) dynamin GTPase	--	[UR]	Intracellular trafficking, secretion, and vesicular transport;; General function prediction only	Dynamin central region	Dynamin-related protein 5A OS=Glycine max OX=3847 PE=2 SV=1	U	Intracellular trafficking, secretion, and vesicular transport	PREDICTED: dynamin-related protein 5A-like isoform X1 [Nelumbo nucifera]
Nn2g11506	--	--	Cellular Component: integral component of membrane (GO:0016021);;	--	--	--	--	Domain of unknown function (DUF4792)	--	O	Posttranslational modification, protein turnover, chaperones	PREDICTED: uncharacterized protein LOC104595042 isoform X1 [Nelumbo nucifera]
Nn5g28204	[O]	Posttranslational modification, protein turnover, chaperones	Biological Process: oxidation-reduction process (GO:0055114);;	--	--	--	--	Glutaredoxin-like domain (DUF836)	--	C	Energy production and conversion	PREDICTED: uncharacterized protein LOC104608479 [Nelumbo nucifera]
Nn4g25029	--	--	--	K00130|2.2e-16|aof:109826632|K00130 betaine-aldehyde dehydrogenase [EC:1.2.1.8] | (RefSeq) betaine aldehyde dehydrogenase 2, mitochondrial-like	Glycine, serine and threonine metabolism (ko00260)	--	--	--	--	S	Function unknown	PREDICTED: uncharacterized protein LOC104610136 [Nelumbo nucifera]
Nn3g18627	--	--	Biological Process: double-strand break repair (GO:0006302);; Biological Process: mitotic G2 DNA damage checkpoint (GO:0007095);; Cellular Component: Mre11 complex (GO:0030870);;	K10867|1.4e-110|nnu:104592162|K10867 nibrin | (RefSeq) nijmegen breakage syndrome 1 protein	Homologous recombination (ko03440)	--	--	FHA domain	Nijmegen breakage syndrome 1 protein OS=Arabidopsis thaliana OX=3702 GN=NBS1 PE=1 SV=1	L	Replication, recombination and repair	PREDICTED: nijmegen breakage syndrome 1 protein isoform X1 [Nelumbo nucifera]
Nn8g40422	--	--	Molecular Function: molecular_function (GO:0003674);; Molecular Function: nucleic acid binding (GO:0003676);; Molecular Function: RNA binding (GO:0003723);; Molecular Function: catalytic activity (GO:0003824);; Molecular Function: nuclease activity (GO:0004518);; Molecular Function: endonuclease activity (GO:0004519);; Molecular Function: binding (GO:0005488);; Cellular Component: cellular_compon…	K01426|7.4e-06|vvi:100248659|K01426 amidase [EC:3.5.1.4] | (RefSeq) putative amidase C869.01	Arginine and proline metabolism (ko00330);; Phenylalanine metabolism (ko00360);; Tryptophan metabolism (ko00380)	--	--	gag-polypeptide of LTR copia-type	--	L	Replication, recombination and repair	uncharacterized protein LOC111023806 [Momordica charantia]
Nn6g34562	--	--	Molecular Function: hydrolase activity, hydrolyzing O-glycosyl compounds (GO:0004553);; Cellular Component: cell wall (GO:0005618);; Biological Process: xyloglucan metabolic process (GO:0010411);; Molecular Function: xyloglucan:xyloglucosyl transferase activity (GO:0016762);; Biological Process: cell wall biogenesis (GO:0042546);; Cellular Component: apoplast (GO:0048046);; Biological Process: ce…	K08235|7.6e-174|nnu:104591216|K08235 xyloglucan:xyloglucosyl transferase [EC:2.4.1.207] | (RefSeq) probable xyloglucan endotransglucosylase/hydrolase protein 6	--	--	--	Glycosyl hydrolases family 16	Probable xyloglucan endotransglucosylase/hydrolase protein 7 OS=Arabidopsis thaliana OX=3702 GN=XTH7 PE=2 SV=2	G	Carbohydrate transport and metabolism	PREDICTED: probable xyloglucan endotransglucosylase/hydrolase protein 6 [Nelumbo nucifera]
Nn8g39696	[R]	General function prediction only	Cellular Component: nucleus (GO:0005634);; Molecular Function: metal ion binding (GO:0046872);;	K11422|2.7e-34|cme:CYME_CMG025C|K11422 [histone H3]-lysine4 N-trimethyltransferase SETD1 [EC:2.1.1.354] | (RefSeq) unknown RNA binding protein	Lysine degradation (ko00310)	[R]	General function prediction only	SET domain	Histone H3-lysine(4) N-trimethyltransferase ATX1 OS=Arabidopsis thaliana OX=3702 GN=ATX1 PE=1 SV=2	S	Function unknown	PREDICTED: uncharacterized protein LOC104588505 isoform X2 [Nelumbo nucifera]
Nn8g39835	--	--	--	--	--	--	--	--	--	--	--	PREDICTED: uncharacterized protein LOC104599411 [Nelumbo nucifera]
Nn1g02881	--	--	Biological Process: reproduction (GO:0000003);; Biological Process: cell morphogenesis (GO:0000902);; Biological Process: cell morphogenesis involved in differentiation (GO:0000904);; Biological Process: developmental process involved in reproduction (GO:0003006);; Cellular Component: cellular_component (GO:0005575);; Cellular Component: cell (GO:0005623);; Cellular Component: plasma membrane (GO…	--	--	--	--	P21-Rho-binding domain	CRIB domain-containing protein RIC6 OS=Arabidopsis thaliana OX=3702 GN=RIC6 PE=1 SV=1	S	Function unknown	CRIB domain-containing protein RIC6-like [Brassica napus]
Nn3g17044	--	--	--	--	--	--	--	Protein of unknown function (DUF760)	--	S	Function unknown	PREDICTED: uncharacterized protein LOC104596072 [Nelumbo nucifera]
Nn2g14836	[R]	General function prediction only	Molecular Function: hydrolase activity, acting on carbon-nitrogen (but not peptide) bonds (GO:0016810);;	K01880|1.8e-29|gsl:Gasu_19070|K01880 glycyl-tRNA synthetase [EC:6.1.1.14] | (RefSeq) glycyl-tRNA synthetase	Aminoacyl-tRNA biosynthesis (ko00970)	--	--	Amidohydrolase family	Protein LONG AFTER FAR-RED 3 OS=Arabidopsis thaliana OX=3702 GN=LAF3 PE=2 SV=1	S	Function unknown	PREDICTED: uncharacterized protein LOC104606051 isoform X1 [Nelumbo nucifera]
Nn2g15784	--	--	Cellular Component: membrane (GO:0016020);; Molecular Function: hydrolase activity, acting on glycosyl bonds (GO:0016798);;	K07964|8.3e-22|nnu:104592548|K07964 heparanase [EC:3.2.1.166] | (RefSeq) heparanase-like protein 3	Glycosaminoglycan degradation (ko00531)	--	--	Glycosyl hydrolase family 79, N-terminal domain	Heparanase-like protein 3 OS=Arabidopsis thaliana OX=3702 GN=At5g34940 PE=2 SV=2	S	Function unknown	PREDICTED: heparanase-like protein 3 [Nelumbo nucifera]
Nn151s44180	--	--	--	--	--	--	--	--	--	--	--	hypothetical protein CSA_004614 [Cucumis sativus]
Nn3g18292	--	--	Cellular Component: integral component of membrane (GO:0016021);;	K00434|2.5e-06|lsv:111888025|K00434 L-ascorbate peroxidase [EC:1.11.1.11] | (RefSeq) thylakoid lumenal 29 kDa protein, chloroplastic-like	Ascorbate and aldarate metabolism (ko00053);; Glutathione metabolism (ko00480)	[S]	Function unknown	TMEM214, C-terminal, caspase 4 activator	--	--	--	PREDICTED: transmembrane protein 214-like [Nelumbo nucifera]
Nn8g38725	--	--	Biological Process: lipid metabolic process (GO:0006629);; Molecular Function: O-acyltransferase activity (GO:0008374);; Cellular Component: integral component of membrane (GO:0016021);;	K00679|0.0e+00|nnu:104600613|K00679 phospholipid:diacylglycerol acyltransferase [EC:2.3.1.158] | (RefSeq) phospholipid:diacylglycerol acyltransferase 1-like	Glycerolipid metabolism (ko00561)	[I]	Lipid transport and metabolism	Lecithin:cholesterol acyltransferase	Phospholipid:diacylglycerol acyltransferase 1 OS=Arabidopsis thaliana OX=3702 GN=PDAT1 PE=2 SV=1	I	Lipid transport and metabolism	PREDICTED: phospholipid:diacylglycerol acyltransferase 1-like [Nelumbo nucifera]
Nn1g03504	--	--	Molecular Function: DNA binding (GO:0003677);; Molecular Function: catalytic activity (GO:0003824);; Cellular Component: nucleus (GO:0005634);;	K09422|2.0e-234|nnu:104610953|K09422 transcription factor MYB, plant | (RefSeq) myb-related protein B-like	--	[K]	Transcription	Myb-like DNA-binding domain	Transcription factor MYB101 OS=Arabidopsis thaliana OX=3702 GN=MYB101 PE=1 SV=1	--	--	PREDICTED: myb-related protein B-like [Nelumbo nucifera]
Nn3g18251	--	--	--	--	--	--	--	--	--	--	--	PREDICTED: uncharacterized protein LOC104604671 [Nelumbo nucifera]
Nn365s46509	--	--	--	--	--	--	--	--	--	--	--	unnamed protein product [Prunus armeniaca]
Nn2g10717	[I]	Lipid transport and metabolism	Molecular Function: acyl-CoA dehydrogenase activity (GO:0003995);; Molecular Function: flavin adenine dinucleotide binding (GO:0050660);;	K00253|9.2e-153|nnu:104594804|K00253 isovaleryl-CoA dehydrogenase [EC:1.3.8.4] | (RefSeq) isovaleryl-CoA dehydrogenase, mitochondrial	Valine, leucine and isoleucine degradation (ko00280)	[EI]	Amino acid transport and metabolism;; Lipid transport and metabolism	Acyl-CoA dehydrogenase, C-terminal domain	Isovaleryl-CoA dehydrogenase, mitochondrial OS=Oryza sativa subsp. japonica OX=39947 GN=Os05g0125500 PE=2 SV=2	--	--	PREDICTED: isovaleryl-CoA dehydrogenase, mitochondrial [Nelumbo nucifera]
Nn4g24240	--	--	Molecular Function: transcription cofactor activity (GO:0003712);; Cellular Component: nucleus (GO:0005634);;	K14494|3.4e-193|nnu:104609975|K14494 DELLA protein | (RefSeq) DELLA protein GAI1-like	Plant hormone signal transduction (ko04075)	--	--	GRAS domain family	DELLA protein GAI1 OS=Vitis vinifera OX=29760 GN=GAI1 PE=2 SV=1	K	Transcription	PREDICTED: DELLA protein GAI1-like [Nelumbo nucifera]
Nn1g05840	--	--	Molecular Function: RNA binding (GO:0003723);; Molecular Function: structural constituent of ribosome (GO:0003735);; Cellular Component: ribosome (GO:0005840);; Biological Process: translation (GO:0006412);; Cellular Component: ribonucleoprotein complex (GO:1990904);;	K02988|9.7e-07|cic:CICLE_v10031158mg|K02988 small subunit ribosomal protein S5 | (RefSeq) hypothetical protein	Ribosome (ko03010)	--	--	--	--	--	--	--
Nn7g36840	--	--	Cellular Component: integral component of membrane (GO:0016021);;	--	--	--	--	--	--	--	--	PREDICTED: uncharacterized protein LOC104607809 isoform X1 [Nelumbo nucifera]
Nn8g40742	--	--	Molecular Function: protein binding (GO:0005515);;	K12117|1.7e-45|brp:103828354|K12117 LOV kelch protein 2 | (RefSeq) adagio protein 2	--	[R]	General function prediction only	Galactose oxidase, central domain	F-box/kelch-repeat protein At1g51550 OS=Arabidopsis thaliana OX=3702 GN=At1g51550 PE=2 SV=1	S	Function unknown	PREDICTED: F-box/kelch-repeat protein At1g51550 [Nelumbo nucifera]
Nn6g32490	[R]	General function prediction only	Molecular Function: catalytic activity (GO:0003824);;	K07071|5.8e-35|nnu:104602045|K07071 uncharacterized protein | (RefSeq) epimerase family protein SDR39U1 homolog, chloroplastic	--	[F]	Nucleotide transport and metabolism	--	Epimerase family protein SDR39U1 homolog, chloroplastic OS=Arabidopsis thaliana OX=3702 GN=GC1 PE=2 SV=2	F	Nucleotide transport and metabolism	PREDICTED: epimerase family protein SDR39U1 homolog, chloroplastic [Nelumbo nucifera]
Nn5g28908	[M]	Cell wall/membrane/envelope biogenesis	Molecular Function: protein binding (GO:0005515);;	--	--	[R]	General function prediction only	Kelch motif	F-box/kelch-repeat protein SKIP6 OS=Arabidopsis thaliana OX=3702 GN=SKIP6 PE=1 SV=1	J	Translation, ribosomal structure and biogenesis	PREDICTED: F-box/kelch-repeat protein SKIP6-like [Nelumbo nucifera]
Nn1g00054	--	--	Cellular Component: integral component of membrane (GO:0016021);;	--	--	--	--	--	Protein CPR-5 OS=Arabidopsis thaliana OX=3702 GN=CPR5 PE=1 SV=1	--	--	PREDICTED: protein CPR-5 isoform X1 [Nelumbo nucifera]
Nelumbo_nucifera_newGene_3446	--	--	Molecular Function: nucleic acid binding (GO:0003676);; Molecular Function: zinc ion binding (GO:0008270);; Biological Process: DNA integration (GO:0015074);;	K12447|1.7e-53|thj:104808371|K12447 UDP-sugar pyrophosphorylase [EC:2.7.7.64] | (RefSeq) uncharacterized protein LOC104808371	Pentose and glucuronate interconversions (ko00040);; Galactose metabolism (ko00052);; Ascorbate and aldarate metabolism (ko00053);; Amino sugar and nucleotide sugar metabolism (ko00520)	[R]	General function prediction only	Reverse transcriptase (RNA-dependent DNA polymerase)	Retrovirus-related Pol polyprotein from transposon RE1 OS=Arabidopsis thaliana OX=3702 GN=RE1 PE=2 SV=1	G	Carbohydrate transport and metabolism	retrovirus-related Pol polyprotein from transposon TNT 1-94 [Trifolium pratense]
Nn4g23399	--	--	Biological Process: regulation of transcription, DNA-templated (GO:0006355);; Cellular Component: H4/H2A histone acetyltransferase complex (GO:0043189);;	--	--	--	--	Chromatin modification-related protein EAF7	--	S	Function unknown	PREDICTED: uncharacterized protein LOC104597968 [Nelumbo nucifera]
Nn2g14077	--	--	Cellular Component: cellular_component (GO:0005575);; Cellular Component: intracellular (GO:0005622);; Cellular Component: cell (GO:0005623);; Cellular Component: nucleus (GO:0005634);; Cellular Component: organelle (GO:0043226);; Cellular Component: membrane-bounded organelle (GO:0043227);; Cellular Component: intracellular organelle (GO:0043229);; Cellular Component: intracellular membrane-boun…	--	--	--	--	--	--	K	Transcription	PREDICTED: uncharacterized protein LOC104586912 isoform X2 [Nelumbo nucifera]
Nn5g31352	--	--	--	--	--	--	--	--	--	--	--	hypothetical protein CSA_004614 [Cucumis sativus]
Nn3g17104	--	--	Molecular Function: zinc ion binding (GO:0008270);;	K05849|8.1e-117|tcc:18613571|K05849 solute carrier family 8 (sodium/calcium exchanger) | (RefSeq) uncharacterized LOC18613571	--	[R]	General function prediction only	PPR repeat	Pentatricopeptide repeat-containing protein At1g59720, chloroplastic/mitochondrial OS=Arabidopsis thaliana OX=3702 GN=PCMP-H51 PE=1 SV=2	--	--	PREDICTED: pentatricopeptide repeat-containing protein At1g59720, chloroplastic/mitochondrial isoform X1 [Nelumbo nucifera]
Nelumbo_nucifera_newGene_1611	--	--	--	--	--	--	--	--	--	--	--	hypothetical protein EE612_052832 [Oryza sativa]
Nn6g32647	--	--	--	--	--	--	--	--	--	--	--	hypothetical protein CQW23_34295 [Capsicum baccatum]
Nn3g19680	[GM]	Carbohydrate transport and metabolism;; Cell wall/membrane/envelope biogenesis	Biological Process: carbohydrate metabolic process (GO:0005975);; Molecular Function: isomerase activity (GO:0016853);; Molecular Function: carbohydrate derivative binding (GO:0097367);; Biological Process: carbohydrate derivative metabolic process (GO:1901135);;	K06041|1.3e-224|nnu:104600887|K06041 arabinose-5-phosphate isomerase [EC:5.3.1.13] | (RefSeq) probable arabinose 5-phosphate isomerase	--	--	--	SIS domain	Probable arabinose 5-phosphate isomerase OS=Arabidopsis thaliana OX=3702 GN=SETH3 PE=2 SV=1	M	Cell wall/membrane/envelope biogenesis	PREDICTED: probable arabinose 5-phosphate isomerase [Nelumbo nucifera]
Nn3g21437	--	--	Molecular Function: transcription factor activity, sequence-specific DNA binding (GO:0003700);; Cellular Component: nucleus (GO:0005634);; Molecular Function: sequence-specific DNA binding (GO:0043565);;	--	--	--	--	--	--	K	Transcription	PREDICTED: probable WRKY transcription factor 4 [Nelumbo nucifera]
Nn1g10199	--	--	Biological Process: defense response (GO:0006952);;	--	--	--	--	Pathogenesis-related protein Bet v 1 family	Norbelladine synthase OS=Narcissus pseudonarcissus OX=39639 GN=NBS PE=1 SV=1	--	--	PREDICTED: S-norcoclaurine synthase 1-like [Nelumbo nucifera]
Nn5g31250	--	--	--	--	--	--	--	--	--	--	--	unnamed protein product [Prunus armeniaca]
Nn2g16015	--	--	Molecular Function: protein kinase activity (GO:0004672);; Molecular Function: ATP binding (GO:0005524);;	--	--	--	--	--	Wall-associated receptor kinase 5 OS=Arabidopsis thaliana OX=3702 GN=WAK5 PE=2 SV=1	T	Signal transduction mechanisms	PREDICTED: wall-associated receptor kinase-like 1 [Nelumbo nucifera]
Nn6g34031	--	--	Molecular Function: zinc ion binding (GO:0008270);;	--	--	--	--	PLATZ transcription factor	--	S	Function unknown	PREDICTED: uncharacterized protein LOC104598572 [Nelumbo nucifera]
Nn1g06910	--	--	Cellular Component: integral component of membrane (GO:0016021);;	--	--	--	--	--	--	--	--	hypothetical protein BVC80_8997g5 [Macleaya cordata]
Nn1g03981	--	--	--	K23541|4.8e-37|aof:109825764|K23541 Ca2+/H+ antiporter, TMEM165/GDT1 family | (RefSeq) putative pentatricopeptide repeat-containing protein At1g68930	--	[R]	General function prediction only	PPR repeat family	Pentatricopeptide repeat-containing protein At5g27110 OS=Arabidopsis thaliana OX=3702 GN=PCMP-E14 PE=2 SV=2	--	--	PREDICTED: pentatricopeptide repeat-containing protein At5g27110 [Nelumbo nucifera]
Nn069s42315	--	--	--	--	--	--	--	--	--	--	--	predicted protein [Micromonas pusilla CCMP1545]
Nelumbo_nucifera_newGene_2617	--	--	--	K17604|7.4e-17|ghi:107892715|K17604 zinc finger SWIM domain-containing protein 3 | (RefSeq) protein FAR1-RELATED SEQUENCE 5-like	--	[R]	General function prediction only	Retrotransposon gag protein	--	L	Replication, recombination and repair	PREDICTED: uncharacterized protein LOC109114250 [Nelumbo nucifera]
Nn5g27581	--	--	--	--	--	--	--	--	--	--	--	PREDICTED: uncharacterized protein LOC104587617 [Nelumbo nucifera]
Nn5g31274	--	--	--	--	--	--	--	--	--	--	--	unnamed protein product [Prunus armeniaca]
Nn2g10591	--	--	Cellular Component: integral component of membrane (GO:0016021);;	K19951|8.4e-252|nsy:104219976|K19951 TBC1 domain family member 8/9 | (RefSeq) TBC1 domain family member 8B-like	--	[U]	Intracellular trafficking, secretion, and vesicular transport	Rab-GTPase-TBC domain	--	U	Intracellular trafficking, secretion, and vesicular transport	PREDICTED: TBC1 domain family member 8B isoform X3 [Nelumbo nucifera]
Nn4g23711	--	--	--	K13115|9.9e-158|nnu:104603054|K13115 coiled-coil domain-containing protein 130 | (RefSeq) coiled-coil domain-containing protein 130	--	[S]	Function unknown	Family of unknown function (DUF572)	--	S	Function unknown	PREDICTED: coiled-coil domain-containing protein 130 [Nelumbo nucifera]
Nn1g08874	--	--	Molecular Function: DNA binding (GO:0003677);; Cellular Component: nucleus (GO:0005634);; Biological Process: regulation of transcription, DNA-templated (GO:0006355);;	K00521|2.9e-43|cmos:111447866|K00521 ferric-chelate reductase [EC:1.16.1.7] | (RefSeq) ferric reduction oxidase 7, chloroplastic-like	--	--	--	No apical meristem (NAM) protein	NAC domain-containing protein 2 OS=Arabidopsis thaliana OX=3702 GN=NAC002 PE=1 SV=2	K	Transcription	PREDICTED: NAC domain-containing protein 2-like [Nelumbo nucifera]
Nn3g17285	--	--	Molecular Function: damaged DNA binding (GO:0003684);; Cellular Component: nucleoplasm (GO:0005654);; Cellular Component: cytosol (GO:0005829);; Biological Process: nucleotide-excision repair (GO:0006289);; Molecular Function: polyubiquitin modification-dependent protein binding (GO:0031593);; Cellular Component: host cell nucleus (GO:0042025);; Molecular Function: ubiquitin binding (GO:0043130);…	K10839|5.0e-134|nnu:104605404|K10839 UV excision repair protein RAD23 | (RefSeq) ubiquitin receptor RAD23b-like	Nucleotide excision repair (ko03420);; Protein processing in endoplasmic reticulum (ko04141)	[L]	Replication, recombination and repair	UBA/TS-N domain	Ubiquitin receptor RAD23b OS=Arabidopsis thaliana OX=3702 GN=RAD23B PE=1 SV=3	O	Posttranslational modification, protein turnover, chaperones	PREDICTED: ubiquitin receptor RAD23b-like isoform X1 [Nelumbo nucifera]
Nn1g07661	--	--	Molecular Function: RNA binding (GO:0003723);;	--	--	[R]	General function prediction only	SPOC domain	Flowering time control protein FPA OS=Arabidopsis thaliana OX=3702 GN=FPA PE=1 SV=2	A	RNA processing and modification	PREDICTED: flowering time control protein FPA [Nelumbo nucifera]
Nn1g07250	--	--	Biological Process: response to acid chemical (GO:0001101);; Molecular Function: molecular_function (GO:0003674);; Molecular Function: binding (GO:0005488);; Molecular Function: protein binding (GO:0005515);; Cellular Component: cellular_component (GO:0005575);; Cellular Component: intracellular (GO:0005622);; Cellular Component: cell (GO:0005623);; Cellular Component: cytoplasm (GO:0005737);; Bi…	--	--	--	--	RbcX protein	Chaperonin-like RBCX protein 1, chloroplastic OS=Arabidopsis thaliana OX=3702 GN=RBCX1 PE=1 SV=1	S	Function unknown	PREDICTED: uncharacterized protein LOC104594073 [Nelumbo nucifera]
Nn1g04112	--	--	--	K10581|1.2e-06|nnu:104599386|K10581 ubiquitin-conjugating enzyme E2 O [EC:2.3.2.24] | (RefSeq) probable ubiquitin-conjugating enzyme E2 24	Ubiquitin mediated proteolysis (ko04120)	--	--	--	--	--	--	--
Nn5g30487	--	--	--	--	--	--	--	--	--	S	Function unknown	PREDICTED: uncharacterized protein LOC104607726 [Nelumbo nucifera]
Nn1g00498	[R]	General function prediction only	Molecular Function: O-methyltransferase activity (GO:0008171);;	K18883|6.6e-39|dosa:Os08t0498100-01|K18883 tricin synthase [EC:2.1.1.175] | (RefSeq) Os08g0498100; Similar to Caffeoyl-CoA O-methyltransferase 2 (EC 2.1.1.104) (Trans-caffeoyl-CoA 3-O-methyltransferase 2) (CCoAMT-2) (CCoAOMT-2).	--	[Q]	Secondary metabolites biosynthesis, transport and catabolism	O-methyltransferase	Tricin synthase 1 OS=Oryza sativa subsp. japonica OX=39947 GN=ROMT-15 PE=1 SV=1	Q	Secondary metabolites biosynthesis, transport and catabolism	PREDICTED: tricin synthase 1-like isoform X8 [Nelumbo nucifera]
Nn4g23373	[G]	Carbohydrate transport and metabolism	Biological Process: carbohydrate metabolic process (GO:0005975);; Molecular Function: glycogen phosphorylase activity (GO:0008184);; Molecular Function: pyridoxal phosphate binding (GO:0030170);; Molecular Function: SHG alpha-glucan phosphorylase activity (GO:0102499);;	K00688|0.0e+00|nnu:104597988|K00688 glycogen phosphorylase [EC:2.4.1.1] | (RefSeq) alpha-1,4 glucan phosphorylase L-2 isozyme, chloroplastic/amyloplastic	Starch and sucrose metabolism (ko00500)	[G]	Carbohydrate transport and metabolism	Carbohydrate phosphorylase	Alpha-1,4 glucan phosphorylase L-1 isozyme, chloroplastic/amyloplastic OS=Solanum tuberosum OX=4113 PE=1 SV=2	G	Carbohydrate transport and metabolism	PREDICTED: alpha-1,4 glucan phosphorylase L-2 isozyme, chloroplastic/amyloplastic [Nelumbo nucifera]
Nn3g20408	--	--	Molecular Function: RNA binding (GO:0003723);;	K21444|0.0e+00|nnu:104588765|K21444 poly(rC)-binding protein 3/4 | (RefSeq) KH domain-containing protein At4g18375-like	--	[AR]	RNA processing and modification;; General function prediction only	KH domain	KH domain-containing protein At4g18375 OS=Arabidopsis thaliana OX=3702 GN=At4g18375 PE=2 SV=1	A	RNA processing and modification	PREDICTED: KH domain-containing protein At4g18375-like [Nelumbo nucifera]
Nn1g01951	--	--	Cellular Component: integral component of membrane (GO:0016021);; Molecular Function: ligase activity (GO:0016874);;	K10601|4.8e-299|nnu:104587248|K10601 E3 ubiquitin-protein ligase synoviolin [EC:2.3.2.27] | (RefSeq) ERAD-associated E3 ubiquitin-protein ligase HRD1B-like	Ubiquitin mediated proteolysis (ko04120);; Protein processing in endoplasmic reticulum (ko04141)	[O]	Posttranslational modification, protein turnover, chaperones	Ring finger domain	ERAD-associated E3 ubiquitin-protein ligase HRD1A OS=Arabidopsis thaliana OX=3702 GN=HRD1A PE=2 SV=1	O	Posttranslational modification, protein turnover, chaperones	PREDICTED: ERAD-associated E3 ubiquitin-protein ligase HRD1B-like [Nelumbo nucifera]
Nn5g28505	--	--	Molecular Function: zinc ion binding (GO:0008270);;	K23541|1.0e-102|pda:103710599|K23541 Ca2+/H+ antiporter, TMEM165/GDT1 family | (RefSeq) pentatricopeptide repeat-containing protein At5g04780, mitochondrial-like	--	[R]	General function prediction only	PPR repeat	Pentatricopeptide repeat-containing protein At2g13600 OS=Arabidopsis thaliana OX=3702 GN=PCMP-E76 PE=3 SV=1	G	Carbohydrate transport and metabolism	PREDICTED: pentatricopeptide repeat-containing protein At2g13600 [Nelumbo nucifera]
Nn4g25624	--	--	Molecular Function: DNA binding (GO:0003677);;	K21596|0.0e+00|nnu:104605104|K21596 calmodulin-binding transcription activator | (RefSeq) calmodulin-binding transcription activator 5-like	--	[S]	Function unknown	CG-1 domain	Calmodulin-binding transcription activator 5 OS=Arabidopsis thaliana OX=3702 GN=CAMTA5 PE=2 SV=2	S	Function unknown	PREDICTED: calmodulin-binding transcription activator 5-like isoform X1 [Nelumbo nucifera]
Nn6g35504	--	--	Molecular Function: ATP transmembrane transporter activity (GO:0005347);; Cellular Component: mitochondrial inner membrane (GO:0005743);; Cellular Component: integral component of membrane (GO:0016021);;	K05863|6.3e-25|nnu:104586679|K05863 solute carrier family 25 (mitochondrial adenine nucleotide translocator), member 4/5/6/31 | (RefSeq) probable ADP,ATP carrier protein At5g56450	--	[C]	Energy production and conversion	Mitochondrial carrier protein	Probable ADP,ATP carrier protein At5g56450 OS=Arabidopsis thaliana OX=3702 GN=At5g56450 PE=2 SV=1	C	Energy production and conversion	PREDICTED: probable ADP,ATP carrier protein At5g56450 [Nelumbo nucifera]
Nn064s42226	[C]	Energy production and conversion	Cellular Component: integral component of membrane (GO:0016021);;	K05573|5.3e-32|aly:32283135|K05573 NAD(P)H-quinone oxidoreductase subunit 2 [EC:7.1.1.2] | (RefSeq) ndhB, B9N47_pgp004; NADH dehydrogenase subunit 2	Oxidative phosphorylation (ko00190)	[C]	Energy production and conversion	Proton-conducting membrane transporter	NAD(P)H-quinone oxidoreductase subunit 2, chloroplastic OS=Allium textile OX=207935 GN=ndhB PE=3 SV=2	C	Energy production and conversion	NADH dehydrogenase subunit 2 chloroplast [Cinnamomum micranthum f. kanehirae]
Nn267s45960	--	--	--	--	--	--	--	--	--	S	Function unknown	hypothetical protein GOBAR_AA32096 [Gossypium barbadense]
Nn8g41320	--	--	--	--	--	--	--	--	--	--	--	unnamed protein product [Prunus armeniaca]
Nn6g31841	[T]	Signal transduction mechanisms	Molecular Function: solute:proton antiporter activity (GO:0015299);; Cellular Component: integral component of membrane (GO:0016021);;	--	--	[P]	Inorganic ion transport and metabolism	Sodium/hydrogen exchanger family	Cation/H(+) antiporter 2 OS=Arabidopsis thaliana OX=3702 GN=CHX2 PE=2 SV=1	P	Inorganic ion transport and metabolism	PREDICTED: cation/H(+) antiporter 1-like [Nelumbo nucifera]
Nn3g20699	--	--	--	--	--	[T]	Signal transduction mechanisms	--	Uncharacterized protein At4g18257 OS=Arabidopsis thaliana OX=3702 GN=At4g18257 PE=1 SV=1	T	Signal transduction mechanisms	PREDICTED: uncharacterized protein At4g18257-like [Nelumbo nucifera]
Nn2g15288	--	--	Biological Process: mRNA splicing, via spliceosome (GO:0000398);;	K12855|1.0e-51|nnu:104588885|K12855 pre-mRNA-processing factor 6 | (RefSeq) protein STABILIZED1	Spliceosome (ko03040)	[A]	RNA processing and modification	Tetratricopeptide repeat	Protein STABILIZED1 OS=Arabidopsis thaliana OX=3702 GN=STA1 PE=1 SV=1	A	RNA processing and modification	PREDICTED: protein STABILIZED1 [Nelumbo nucifera]
Nn2g14656	--	--	Cellular Component: nucleus (GO:0005634);;	--	--	--	--	TFIIS helical bundle-like domain	Probable mediator of RNA polymerase II transcription subunit 26b OS=Arabidopsis thaliana OX=3702 GN=MED26B PE=2 SV=1	K	Transcription	PREDICTED: probable mediator of RNA polymerase II transcription subunit 26b [Nelumbo nucifera]
Nn1g09159	--	--	Biological Process: transcription, DNA-templated (GO:0006351);; Molecular Function: sequence-specific DNA binding (GO:0043565);;	--	--	--	--	Seed dormancy control	Protein DOG1-like 4 OS=Arabidopsis thaliana OX=3702 GN=DOGL4 PE=1 SV=1	S	Function unknown	PREDICTED: transcription factor TGA2.3-like [Nelumbo nucifera]
Nn1g00672	--	--	Cellular Component: proteasome regulatory particle, base subcomplex (GO:0008540);; Biological Process: protein catabolic process (GO:0030163);; Molecular Function: enzyme regulator activity (GO:0030234);; Biological Process: regulation of protein catabolic process (GO:0042176);;	K03028|0.0e+00|nnu:104609868|K03028 26S proteasome regulatory subunit N1 | (RefSeq) 26S proteasome non-ATPase regulatory subunit 2 homolog A	Proteasome (ko03050)	[O]	Posttranslational modification, protein turnover, chaperones	RPN1/RPN2 N-terminal domain	26S proteasome non-ATPase regulatory subunit 2 homolog A OS=Arabidopsis thaliana OX=3702 GN=RPN1A PE=1 SV=2	O	Posttranslational modification, protein turnover, chaperones	PREDICTED: 26S proteasome non-ATPase regulatory subunit 2 homolog A isoform X4 [Nelumbo nucifera]
Nn1g03162	--	--	Molecular Function: protein binding (GO:0005515);;	K14829|6.2e-241|nnu:104587917|K14829 pre-rRNA-processing protein IPI3 | (RefSeq) protein ROOT INITIATION DEFECTIVE 3-like	--	--	--	WD domain, G-beta repeat	--	S	Function unknown	PREDICTED: protein ROOT INITIATION DEFECTIVE 3-like [Nelumbo nucifera]
Nn6g34595	--	--	--	--	--	[MW]	Cell wall/membrane/envelope biogenesis;; Extracellular structures	Fasciclin domain	Fasciclin-like arabinogalactan protein 17 OS=Arabidopsis thaliana OX=3702 GN=FLA17 PE=2 SV=1	--	--	PREDICTED: fasciclin-like arabinogalactan protein 17 [Nelumbo nucifera]
Nn1g02806	--	--	Molecular Function: methyltransferase activity (GO:0008168);; Cellular Component: integral component of membrane (GO:0016021);; Biological Process: methylation (GO:0032259);;	K23872|5.2e-78|ppp:112276092|K23872 putative homogalacturonan methyltransferase [EC:2.1.1.-] | (RefSeq) probable methyltransferase PMT13	--	--	--	Putative S-adenosyl-L-methionine-dependent methyltransferase	Probable methyltransferase PMT3 OS=Arabidopsis thaliana OX=3702 GN=At4g14360 PE=2 SV=1	S	Function unknown	PREDICTED: probable methyltransferase PMT3 [Nelumbo nucifera]
Nn1g01711	--	--	Cellular Component: integral component of membrane (GO:0016021);;	--	--	--	--	Late embryogenesis abundant protein	--	S	Function unknown	PREDICTED: late embryogenesis abundant protein At1g64065 [Nelumbo nucifera]
Nn7g35829	--	--	Molecular Function: DNA binding (GO:0003677);; Molecular Function: zinc ion binding (GO:0008270);;	--	--	[R]	General function prediction only	A20-like zinc finger	Zinc finger A20 and AN1 domain-containing stress-associated protein 6 OS=Oryza sativa subsp. japonica OX=39947 GN=SAP6 PE=2 SV=1	S	Function unknown	PREDICTED: zinc finger A20 and AN1 domain-containing stress-associated protein 6-like [Nelumbo nucifera]
Nn267s45964	--	--	--	--	--	--	--	--	--	--	--	predicted protein [Micromonas pusilla CCMP1545]
Nn2g15729	--	--	Molecular Function: DNA binding (GO:0003677);; Molecular Function: alkylbase DNA N-glycosylase activity (GO:0003905);; Biological Process: base-excision repair (GO:0006284);;	K03652|3.5e-07|zju:107409860|K03652 DNA-3-methyladenine glycosylase [EC:3.2.2.21] | (RefSeq) DNA-3-methyladenine glycosylase	Base excision repair (ko03410)	[L]	Replication, recombination and repair	Methylpurine-DNA glycosylase (MPG)	DNA-3-methyladenine glycosylase OS=Arabidopsis thaliana OX=3702 GN=MAG PE=2 SV=1	--	--	hypothetical protein F2Q69_00031864 [Brassica cretica]
Nn5g28677	[R]	General function prediction only	Molecular Function: protein binding (GO:0005515);; Cellular Component: cellular_component (GO:0005575);; Cellular Component: intracellular (GO:0005622);; Cellular Component: cell (GO:0005623);; Cellular Component: cytoplasm (GO:0005737);; Cellular Component: endosome (GO:0005768);; Cellular Component: Golgi apparatus (GO:0005794);; Cellular Component: trans-Golgi network (GO:0005802);; Cellular C…	K20241|3.0e-272|nnu:104590337|K20241 WD repeat-containing protein 44 | (RefSeq) WD repeat-containing protein 44-like	--	[S]	Function unknown	WD domain, G-beta repeat	Protein SPA1-RELATED 3 OS=Arabidopsis thaliana OX=3702 GN=SPA3 PE=1 SV=1	L	Replication, recombination and repair	PREDICTED: WD repeat-containing protein 44-like isoform X1 [Nelumbo nucifera]
Nn6g32674	--	--	--	--	--	--	--	--	--	S	Function unknown	hypothetical protein CQW23_35335 [Capsicum baccatum]
Nn8g40941	--	--	--	--	--	--	--	--	--	S	Function unknown	PREDICTED: uncharacterized protein LOC104605865 [Nelumbo nucifera]
Nn203s45008	--	--	--	--	--	--	--	--	--	--	--	hypothetical protein CQW23_34295 [Capsicum baccatum]
Nn1g04355	[GHR]	Carbohydrate transport and metabolism;; Coenzyme transport and metabolism;; General function prediction only	Molecular Function: magnesium ion binding (GO:0000287);; Molecular Function: carboxy-lyase activity (GO:0016831);; Molecular Function: thiamine pyrophosphate binding (GO:0030976);;	K01568|0.0e+00|nnu:104613083|K01568 pyruvate decarboxylase [EC:4.1.1.1] | (RefSeq) pyruvate decarboxylase 1-like	Glycolysis / Gluconeogenesis (ko00010)	[EH]	Amino acid transport and metabolism;; Coenzyme transport and metabolism	Thiamine pyrophosphate enzyme, N-terminal TPP binding domain	Pyruvate decarboxylase 1 OS=Pisum sativum OX=3888 GN=PDC1 PE=2 SV=1	--	--	PREDICTED: pyruvate decarboxylase 1-like [Nelumbo nucifera]
Nn6g33907	--	--	Cellular Component: integral component of membrane (GO:0016021);;	--	--	--	--	PLAC8 family	Cell number regulator 6 OS=Zea mays OX=4577 GN=CNR6 PE=2 SV=1	S	Function unknown	PREDICTED: cell number regulator 6-like [Nelumbo nucifera]
Nn5g31353	--	--	--	--	--	--	--	--	--	S	Function unknown	hypothetical protein CQW23_35335 [Capsicum baccatum]
Nn7g35866	--	--	Cellular Component: integral component of membrane (GO:0016021);;	--	--	--	--	--	--	--	--	PREDICTED: uncharacterized protein LOC104597667 [Nelumbo nucifera]
Nn3g19580	--	--	Molecular Function: motor activity (GO:0003774);; Molecular Function: actin binding (GO:0003779);; Molecular Function: ATP binding (GO:0005524);; Biological Process: actin filament organization (GO:0007015);; Cellular Component: myosin complex (GO:0016459);;	K10357|3.8e-10|nnu:104610077|K10357 myosin V | (RefSeq) myosin-9-like	--	[Z]	Cytoskeleton	--	Myosin-9 OS=Arabidopsis thaliana OX=3702 GN=XI-C PE=2 SV=1	Z	Cytoskeleton	hypothetical protein AXF42_Ash006076 [Apostasia shenzhenica]
Nn5g29119	--	--	Cellular Component: integral component of membrane (GO:0016021);;	K13946|4.9e-274|nnu:104607586|K13946 auxin influx carrier (AUX1 LAX family) | (RefSeq) auxin transporter-like protein 2	Plant hormone signal transduction (ko04075)	[E]	Amino acid transport and metabolism	Transmembrane amino acid transporter protein	Auxin transporter-like protein 5 OS=Medicago truncatula OX=3880 GN=LAX5 PE=2 SV=1	E	Amino acid transport and metabolism	PREDICTED: auxin transporter-like protein 2 [Nelumbo nucifera]
Nn4g22754	--	--	--	K04728|4.9e-66|pmum:103338375|K04728 serine-protein kinase ATM [EC:2.7.11.1] | (RefSeq) serine/threonine-protein kinase ATM	Homologous recombination (ko03440)	--	--	PWWP domain	Serine/threonine-protein kinase ATM OS=Arabidopsis thaliana OX=3702 GN=ATM PE=1 SV=1	--	--	PREDICTED: uncharacterized protein LOC104587226 [Nelumbo nucifera]
Nn2g15930	--	--	--	--	--	--	--	--	--	--	--	PREDICTED: uncharacterized protein LOC104590932 [Nelumbo nucifera]
Nn4g22737	--	--	--	K22262|2.2e-73|qsu:112034235|K22262 WD repeat and FYVE domain-containing protein 3 | (RefSeq) protein SPIRRIG	--	[R]	General function prediction only	PPR repeat family	Pentatricopeptide repeat-containing protein At5g27110 OS=Arabidopsis thaliana OX=3702 GN=PCMP-E14 PE=2 SV=2	L	Replication, recombination and repair	PREDICTED: pentatricopeptide repeat-containing protein At1g74600, chloroplastic [Nelumbo nucifera]
Nn2g11896	[HC]	Coenzyme transport and metabolism;; Energy production and conversion	--	K09838|1.1e-11|ccav:112526755|K09838 zeaxanthin epoxidase [EC:1.14.15.21] | (RefSeq) zeaxanthin epoxidase, chloroplastic-like	Carotenoid biosynthesis (ko00906)	[CR]	Energy production and conversion;; General function prediction only	FAD binding domain	--	C	Energy production and conversion	PREDICTED: uncharacterized protein LOC104595300 [Nelumbo nucifera]
Nn1g01080	[GI]	Carbohydrate transport and metabolism;; Lipid transport and metabolism	Molecular Function: pectinesterase activity (GO:0030599);; Biological Process: cell wall modification (GO:0042545);; Molecular Function: aspartyl esterase activity (GO:0045330);;	K01051|1.6e-51|nnu:104599379|K01051 pectinesterase [EC:3.1.1.11] | (RefSeq) probable pectinesterase/pectinesterase inhibitor 7	Pentose and glucuronate interconversions (ko00040)	--	--	Pectinesterase	Probable pectinesterase/pectinesterase inhibitor 41 OS=Arabidopsis thaliana OX=3702 GN=PME41 PE=2 SV=2	G	Carbohydrate transport and metabolism	PREDICTED: probable pectinesterase/pectinesterase inhibitor 41 [Nelumbo nucifera]
Nn7g35839	[O]	Posttranslational modification, protein turnover, chaperones	Molecular Function: serine-type endopeptidase activity (GO:0004252);;	K15333|8.4e-82|nsy:104224633|K15333 tRNA guanosine-2'-O-methyltransferase [EC:2.1.1.34] | (RefSeq) uncharacterized protein LOC104224633	--	--	--	Subtilase family	Subtilisin-like protease SBT3.18 OS=Arabidopsis thaliana OX=3702 GN=SBT3.18 PE=3 SV=2	O	Posttranslational modification, protein turnover, chaperones	PREDICTED: subtilisin-like protease SBT3.18 [Nelumbo nucifera]
Nn1g03451	--	--	--	K12606|6.2e-177|nnu:104588295|K12606 CCR4-NOT transcription complex subunit 9 | (RefSeq) cell differentiation protein RCD1 homolog	RNA degradation (ko03018)	[R]	General function prediction only	Cell differentiation family, Rcd1-like	--	S	Function unknown	PREDICTED: cell differentiation protein RCD1 homolog [Nelumbo nucifera]
Nn7g38307	--	--	Cellular Component: integral component of membrane (GO:0016021);;	K19040|1.4e-48|tcc:18607019|K19040 E3 ubiquitin-protein ligase ATL10/75/76/77/78 [EC:2.3.2.27] | (RefSeq) RING-H2 finger protein ATL74	--	[O]	Posttranslational modification, protein turnover, chaperones	Ring finger domain	RING-H2 finger protein ATL8 OS=Arabidopsis thaliana OX=3702 GN=ATL8 PE=2 SV=2	O	Posttranslational modification, protein turnover, chaperones	PREDICTED: RING-H2 finger protein ATL74-like [Nelumbo nucifera]
Nn1g09634	--	--	Molecular Function: molecular_function (GO:0003674);; Molecular Function: nucleic acid binding (GO:0003676);; Molecular Function: RNA binding (GO:0003723);; Molecular Function: catalytic activity (GO:0003824);; Molecular Function: nuclease activity (GO:0004518);; Molecular Function: endonuclease activity (GO:0004519);; Molecular Function: binding (GO:0005488);; Cellular Component: cellular_compon…	K01183|1.1e-08|ini:109153286|K01183 chitinase [EC:3.2.1.14] | (RefSeq) pentatricopeptide repeat-containing protein At3g46870-like	Amino sugar and nucleotide sugar metabolism (ko00520)	[R]	General function prediction only	PPR repeat family	Pentatricopeptide repeat-containing protein At3g53170 OS=Arabidopsis thaliana OX=3702 GN=At3g53170 PE=3 SV=1	G	Carbohydrate transport and metabolism	PREDICTED: pentatricopeptide repeat-containing protein At3g53170 isoform X3 [Nelumbo nucifera]
Nn5g27251	--	--	Molecular Function: transferase activity, transferring glycosyl groups (GO:0016757);;	--	--	[R]	General function prediction only	Tetratricopeptide repeat	--	E	Amino acid transport and metabolism	PREDICTED: probable UDP-N-acetylglucosamine--peptide N-acetylglucosaminyltransferase SPINDLY [Nelumbo nucifera]
Nn6g35619	[M]	Cell wall/membrane/envelope biogenesis	Molecular Function: protein serine/threonine kinase activity (GO:0004674);; Molecular Function: ATP binding (GO:0005524);; Cellular Component: integral component of membrane (GO:0016021);;	K20718|1.2e-292|nnu:104609325|K20718 LRR receptor-like serine/threonine-protein kinase ERECTA [EC:2.7.11.1] | (RefSeq) LRR receptor-like serine/threonine-protein kinase ERECTA	MAPK signaling pathway - plant (ko04016)	--	--	Protein kinase domain	LRR receptor-like serine/threonine-protein kinase ERECTA OS=Arabidopsis thaliana OX=3702 GN=ERECTA PE=1 SV=1	T	Signal transduction mechanisms	PREDICTED: LRR receptor-like serine/threonine-protein kinase ERECTA isoform X2 [Nelumbo nucifera]
Nn3g16638	--	--	Molecular Function: metal ion binding (GO:0046872);;	K23047|1.1e-36|dcr:108218050|K23047 E3 ubiquitin-protein ligase UNKL [EC:2.3.2.27] | (RefSeq) zinc finger CCCH domain-containing protein 2	--	[R]	General function prediction only	--	Zinc finger CCCH domain-containing protein 30 OS=Arabidopsis thaliana OX=3702 GN=At2g41900 PE=1 SV=2	P	Inorganic ion transport and metabolism	PREDICTED: zinc finger CCCH domain-containing protein 30-like [Nelumbo nucifera]
Nn1g05067	--	--	--	--	--	--	--	PLATZ transcription factor	--	S	Function unknown	PREDICTED: uncharacterized protein LOC104588170 isoform X1 [Nelumbo nucifera]
Nn1g03810	--	--	Molecular Function: DNA binding (GO:0003677);; Cellular Component: nucleus (GO:0005634);; Biological Process: regulation of transcription, DNA-templated (GO:0006355);;	K20043|2.5e-18|aip:107640400|K20043 clathrin coat assembly protein AP180 | (RefSeq) putative clathrin assembly protein At5g35200	--	--	--	Dof domain, zinc finger	Dof zinc finger protein DOF1.2 OS=Arabidopsis thaliana OX=3702 GN=DOF1.2 PE=2 SV=1	K	Transcription	PREDICTED: dof zinc finger protein DOF1.2-like [Nelumbo nucifera]
[truncated: 34,065 more rows]
