# Supplementary material for: Comparative transcriptomic analysis provides insight into carpel petaloidy in lotus (Nelumbo nucifera)
Source: PeerJ. 2021 Oct 25;9:e12322. doi: 10.7717/peerj.12322 (PMC8552788; doi:10.7717/peerj.12322)
Supplement: Supplemental Information 10 [file peerj-09-12322-s010.xlsx]

## Sheet: 1568 annotated common DEGs
#ID	gene_name	C1_FPKM	C1_count	C2_FPKM	C2_count	C3_FPKM	C3_count	Cp1_FPKM	Cp1_count	Cp2_FPKM	Cp2_count	Cp3_FPKM	Cp3_count	P1_FPKM	P1_count	P2_FPKM	P2_count	P3_FPKM	P3_count	C1_C2_C3_vs_Cp1_Cp2_Cp3_DESeq2_FDR	C1_C2_C3_vs_Cp1_Cp2_Cp3_DESeq2_log2FC	C1_C2_C3_vs_Cp1_Cp2_Cp3_DESeq2_(FDR_0.01_FC_2)_regulated	C1_C2_C3_vs_P1_P2_P3_DESeq2_FDR	C1_C2_C3_vs_P1_P2_P3_DESeq2_log2FC	C1_C2_C3_vs_P1_P2_P3_DESeq2_(FDR_0.01_FC_2)_regulated	P1_P2_P3_vs_Cp1_Cp2_Cp3_DESeq2_FDR	P1_P2_P3_vs_Cp1_Cp2_Cp3_DESeq2_log2FC	P1_P2_P3_vs_Cp1_Cp2_Cp3_DESeq2_(FDR_0.01_FC_2)_regulated	COG_class	COG_class_annotation	GO_annotation	KEGG_annotation	KEGG_pathway_annotation	KOG_class	KOG_class_annotation	Pfam_annotation	Swiss_Prot_annotation	eggNOG_class	eggNOG_class_annotation	NR_annotation
Nelumbo_nucifera_newGene_102	--	4.39168	351	4.70437	342	4.54545	418	7.94511	590	10.9037	1006	7.01664	598	24.8494	2218	29.5298	2388	16.2137	1324	7.57e-06	1.05792	up	4.16e-24	2.86523	up	1.9e-07	-1.77675	down	--	--	--	K22686|2.2e-14|qsu:111995479|K22686 pro-apoptotic serine protease NMA111 [EC:3.4.21.-] | (RefSeq) protease Do-like 7	--	--	--	--	--	S	Function unknown	PREDICTED: uncharacterized protein LOC104613207 [Nelumbo nucifera]
Nelumbo_nucifera_newGene_1555	--	0.175976	29	0.100292	17	0.116338	23	0.740741	114	1.02326	187	0.417491	74	1.56408	269	2.2797	356	1.49672	248	1.19e-07	2.39454	up	3.68e-35	4.08653	up	0.000135453	-1.54306	down	--	--	Molecular Function: protein serine/threonine kinase activity (GO:0004674);; Molecular Function: calcium ion binding (GO:0005509);; Molecular Function: ATP binding (GO:0005524);; Cellular Component: integral component of membrane (GO:0016021);; Molecular Function: polysaccharide binding (GO:0030247);;	K00430|6.6e-43|nnu:104598179|K00430 peroxidase [EC:1.11.1.7] | (RefSeq) wall-associated receptor kinase 2-like	Phenylpropanoid biosynthesis (ko00940)	--	--	Wall-associated receptor kinase galacturonan-binding	Wall-associated receptor kinase 2 OS=Arabidopsis thaliana OX=3702 GN=WAK2 PE=1 SV=1	--	--	PREDICTED: uncharacterized protein LOC104589347 [Nelumbo nucifera]
Nelumbo_nucifera_newGene_1838	--	2.73634	43	2.21648	34	1.7899	32	9.44064	138	9.00092	158	5.61134	94	28.6802	470	29.7275	442	18.4222	290	2.63e-07	1.86974	up	5.15e-33	3.88222	up	1.42e-08	-1.93884	down	--	--	--	K01528|4.2e-07|lja:Lj0g3v0199559.2|K01528 dynamin 1/3 [EC:3.6.5.5] | (RefSeq) Lj0g3v0199559.2; -	Endocytosis (ko04144)	--	--	--	--	L	Replication, recombination and repair	hypothetical protein F2P56_015863 [Juglans regia]
Nelumbo_nucifera_newGene_2248	--	0.008382	2	0	0	0	0	10.9226	1801	6.10077	1287	2.1607	455	19.8642	4101	31.1602	5684	72.273	13969	6.48e-22	7.51163	up	2.11e-55	12.7554	up	1.72e-06	-2.8128	down	--	--	--	K19525|2.7e-78|dct:110098611|K19525 vacuolar protein sorting-associated protein 13A/C | (RefSeq) uncharacterized protein LOC110098611	--	[R]	General function prediction only	Reverse transcriptase (RNA-dependent DNA polymerase)	RNA-directed DNA polymerase homolog OS=Oenothera berteroana OX=3950 PE=4 SV=1	O	Posttranslational modification, protein turnover, chaperones	PREDICTED: uncharacterized protein LOC104590196 [Nelumbo nucifera]
Nelumbo_nucifera_newGene_2333	--	1.29444	143	1.233	132	1.04348	132	0.17733	19	0.528009	67	0.25934	32	4.03023	472	1.30972	140	2.66601	301	0.000271827	-1.6298	down	0.000364696	1.57487	up	1.38e-08	-3.11298	down	[G]	Carbohydrate transport and metabolism	Biological Process: polysaccharide biosynthetic process (GO:0000271);; Molecular Function: molecular_function (GO:0003674);; Molecular Function: catalytic activity (GO:0003824);; Cellular Component: cellular_component (GO:0005575);; Cellular Component: intracellular (GO:0005622);; Cellular Component: cell (GO:0005623);; Cellular Component: cytoplasm (GO:0005737);; Biological Process: carbohydrate…	K00703|2.1e-154|nnu:104589519|K00703 starch synthase [EC:2.4.1.21] | (RefSeq) granule-bound starch synthase 2, chloroplastic/amyloplastic-like	Starch and sucrose metabolism (ko00500)	--	--	Starch synthase catalytic domain	Granule-bound starch synthase 2, chloroplastic/amyloplastic OS=Solanum tuberosum OX=4113 GN=SS2 PE=1 SV=3	H	Coenzyme transport and metabolism	PREDICTED: granule-bound starch synthase 2, chloroplastic/amyloplastic-like [Nelumbo nucifera]
Nelumbo_nucifera_newGene_2993	--	2.76398	251	2.55541	226	3.02026	324	0.834204	66	1.36791	126	0.773197	77	0.207433	21	0.149529	14	0.214165	21	2.11e-07	-1.4466	down	6.65e-31	-3.35002	down	1.84e-05	1.81499	up	--	--	--	--	--	--	--	--	--	--	--	PREDICTED: uncharacterized protein LOC104605347 [Nelumbo nucifera]
Nelumbo_nucifera_newGene_3002	--	0	0	0	0	0	0	0.315682	120	0.404889	179	0.132964	64	22.6249	11454	8.70773	4020	4.33537	1466	1.23e-17	6.56985	up	2.17e-25	12.2098	up	6.17e-17	-5.32777	down	--	--	--	K01528|9.2e-33|lja:Lj0g3v0199559.2|K01528 dynamin 1/3 [EC:3.6.5.5] | (RefSeq) Lj0g3v0199559.2; -	Endocytosis (ko04144)	[R]	General function prediction only	--	Uncharacterized mitochondrial protein AtMg00810 OS=Arabidopsis thaliana OX=3702 GN=AtMg00810 PE=4 SV=1	--	--	PREDICTED: uncharacterized protein LOC109114187 [Nelumbo nucifera]
Nelumbo_nucifera_newGene_408	--	0.708662	54	0.515629	40	0.458581	41	2.15466	157	2.41696	208	1.82522	151	7.05485	570	3.32167	245	5.19007	403	5.05e-12	1.98233	up	4.62e-22	3.56991	up	1.44e-05	-1.55555	down	--	--	Molecular Function: nucleic acid binding (GO:0003676);; Molecular Function: RNA-DNA hybrid ribonuclease activity (GO:0004523);;	--	--	--	--	--	--	--	--	PREDICTED: uncharacterized protein LOC109115811 [Nelumbo nucifera]
Nelumbo_nucifera_newGene_785	--	1.86477	295	1.6362	283	1.18398	224	0.666417	91	0.535803	80	0.712085	127	0.290026	31	0.17389	29	0.072358	15	1.36e-05	-1.31053	down	1.01e-14	-2.9311	down	0.000528414	1.55149	up	--	--	--	--	--	--	--	Retrotransposon gag protein	--	L	Replication, recombination and repair	PREDICTED: uncharacterized protein LOC104593299 [Nelumbo nucifera]
Nelumbo_nucifera_newGene_830	--	0.26143	39	0.595124	84	0.354595	61	1.1082	154	3.29027	545	0.879772	140	0.012699	3	0	0	0.034918	6	0.000241225	2.03911	up	2.29e-06	-3.70457	down	2.03e-13	5.30058	up	--	--	--	--	--	--	--	--	--	--	--	PREDICTED: uncharacterized protein LOC104610225 [Nelumbo nucifera]
Nelumbo_nucifera_newGene_87	--	2.76595	85	1.68168	50	1.40663	50	3.76385	110	14.5082	503	3.98878	133	23.7718	772	57.1092	1683	24.1354	753	0.000963386	1.87756	up	6.6e-25	4.50349	up	9.62e-05	-2.33348	down	[O]	Posttranslational modification, protein turnover, chaperones	Cellular Component: cellular_component (GO:0005575);; Cellular Component: intracellular (GO:0005622);; Cellular Component: cell (GO:0005623);; Cellular Component: nucleus (GO:0005634);; Cellular Component: cytoplasm (GO:0005737);; Biological Process: biological_process (GO:0008150);; Biological Process: response to radiation (GO:0009314);; Biological Process: response to light stimulus (GO:000941…	K03686|2.5e-06|dcr:108196704|K03686 molecular chaperone DnaJ | (RefSeq) chaperone protein DnaJ	--	[O]	Posttranslational modification, protein turnover, chaperones	DnaJ domain	Chaperone protein dnaJ 8, chloroplastic OS=Arabidopsis thaliana OX=3702 GN=ATJ8 PE=2 SV=1	O	Posttranslational modification, protein turnover, chaperones	PREDICTED: chaperone protein dnaJ 8, chloroplastic-like [Nelumbo nucifera]
Nelumbo_nucifera_newGene_985	--	1.99494	263	2.12394	271	1.87456	283	0.63129	79	0.725245	109	0.720313	104	0.029276	5	0.066305	9	0.062736	9	5.22e-12	-1.37888	down	4.63e-36	-4.63765	down	2.5e-13	3.15298	up	--	--	Molecular Function: nucleic acid binding (GO:0003676);; Biological Process: DNA integration (GO:0015074);;	K23288|2.0e-15|gra:105761952|K23288 syndetin | (RefSeq) uncharacterized LOC105761952	--	[R]	General function prediction only	--	--	L	Replication, recombination and repair	PREDICTED: uncharacterized protein LOC104601508 [Nelumbo nucifera]
Nn004s41404	Nn004s41404	5.11292	204	3.74097	144	4.22116	199	11.6137	447	14.1913	588	10.7309	424	26.9218	1059	24.8958	890	14.1224	586	4.41e-13	1.50206	up	6.77e-20	2.66105	up	0.000200115	-1.14795	down	[I]	Lipid transport and metabolism	Molecular Function: 1-acylglycerol-3-phosphate O-acyltransferase activity (GO:0003841);; Biological Process: phospholipid biosynthetic process (GO:0008654);; Cellular Component: integral component of membrane (GO:0016021);;	K13509|2.4e-93|jre:108993678|K13509 lysophosphatidate acyltransferase [EC:2.3.1.51] | (RefSeq) 1-acyl-sn-glycerol-3-phosphate acyltransferase-like isoform X1	Glycerolipid metabolism (ko00561);; Glycerophospholipid metabolism (ko00564)	[I]	Lipid transport and metabolism	Acyltransferase	1-acyl-sn-glycerol-3-phosphate acyltransferase OS=Cocos nucifera OX=13894 PE=1 SV=1	I	Lipid transport and metabolism	PREDICTED: 1-acyl-sn-glycerol-3-phosphate acyltransferase-like [Nelumbo nucifera]
Nn1g00080	Nn1g00080	2.02917	89	4.31913	183	2.93544	147	92.3456	3822	57.0889	2824	143.875	6820	0.059384	4	0	0	0.058986	3	2.8e-40	4.88183	up	5.68e-14	-5.21027	down	1.6e-67	9.61277	up	[QV]	Secondary metabolites biosynthesis, transport and catabolism;; Defense mechanisms	Molecular Function: monooxygenase activity (GO:0004497);; Molecular Function: iron ion binding (GO:0005506);; Cellular Component: integral component of membrane (GO:0016021);; Molecular Function: oxidoreductase activity, acting on paired donors, with incorporation or reduction of molecular oxygen (GO:0016705);; Molecular Function: heme binding (GO:0020037);;	K22983|9.7e-81|cit:102617505|K22983 cytochrome P450 family 76 subfamily A | (RefSeq) cytochrome P450 76A1-like	--	[Q]	Secondary metabolites biosynthesis, transport and catabolism	Cytochrome P450	Iridoid oxidase OS=Catharanthus roseus OX=4058 GN=IO PE=1 SV=1	Q	Secondary metabolites biosynthesis, transport and catabolism	PREDICTED: geraniol 8-hydroxylase-like [Nelumbo nucifera]
Nn1g00108	Nn1g00108	10.4594	452	24.2809	941	18.2933	813	136.154	4626	108.091	4955	102.818	4470	378.121	14817	173.352	6168	547.221	20678	1.35e-21	2.69797	up	5.96e-24	4.56948	up	6.6e-06	-1.84113	down	--	--	--	--	--	--	--	--	--	S	Function unknown	PREDICTED: glycine-rich cell wall structural protein 1.8-like [Nelumbo nucifera]
Nn1g00134	Nn1g00134	0.618668	52	0.412643	34	0.730089	71	1.09175	88	2.14647	205	0.888301	82	0.027687	3	0.114269	10	0.021348	2	0.00577602	1.28321	up	7.78e-05	-2.75551	down	5.39e-09	3.79944	up	[M]	Cell wall/membrane/envelope biogenesis	Molecular Function: hydrolase activity, acting on ester bonds (GO:0016788);;	K01114|0.0e+00|nnu:104585630|K01114 phospholipase C [EC:3.1.4.3] | (RefSeq) non-specific phospholipase C3-like	Inositol phosphate metabolism (ko00562);; Glycerophospholipid metabolism (ko00564);; Ether lipid metabolism (ko00565)	--	--	Phosphoesterase family	Non-specific phospholipase C3 OS=Arabidopsis thaliana OX=3702 GN=NPC3 PE=2 SV=1	M	Cell wall/membrane/envelope biogenesis	PREDICTED: non-specific phospholipase C3-like [Nelumbo nucifera]
Nn1g00152	Nn1g00152	2.24607	127	1.05309	58	2.42145	160	6.10543	327	7.2216	451	7.09959	420	0	0	0	0	0	0	5.93e-09	1.86432	up	6.44e-10	-7.66404	down	3.33e-27	8.26514	up	--	--	Molecular Function: DNA binding (GO:0003677);; Cellular Component: nucleus (GO:0005634);;	K09422|1.7e-162|nnu:104585655|K09422 transcription factor MYB, plant | (RefSeq) transcription factor MYB39-like	--	[K]	Transcription	Myb-like DNA-binding domain	Transcription factor MYB93 OS=Arabidopsis thaliana OX=3702 GN=MYB93 PE=1 SV=1	--	--	PREDICTED: transcription factor MYB39-like [Nelumbo nucifera]
Nn1g00164	Nn1g00164	2.89739	53	4.21769	75	4.29314	90	13.3731	231	18.5387	382	9.65955	191	36.4993	704	23.6832	415	35.8913	666	3.82e-08	1.9123	up	4.64e-32	3.45578	up	1.82e-05	-1.47859	down	--	--	Biological Process: defense response (GO:0006952);; Molecular Function: (S)-norcoclaurine synthase activity (GO:0050474);;	K18592|2.4e-07|psom:113339244|K18592 gamma-glutamyltranspeptidase / glutathione hydrolase / leukotriene-C4 hydrolase [EC:2.3.2.2 3.4.19.13 3.4.19.14] | (RefSeq) glutathione hydrolase 3-like	Taurine and hypotaurine metabolism (ko00430);; Cyanoamino acid metabolism (ko00460);; Glutathione metabolism (ko00480);; Arachidonic acid metabolism (ko00590)	--	--	Pathogenesis-related protein Bet v 1 family	Norbelladine synthase OS=Narcissus pseudonarcissus OX=39639 GN=NBS PE=1 SV=1	S	Function unknown	PREDICTED: S-norcoclaurine synthase 1-like [Nelumbo nucifera]
Nn1g00176	Nn1g00176	32.2105	3533	27.248	2896	28.639	3630	4.57114	510	4.47671	549	6.36583	772	0.05282	7	0.062672	8	0.049011	7	2.21e-44	-2.34035	down	4.76e-141	-8.29008	down	6.83e-53	5.79903	up	[G]	Carbohydrate transport and metabolism	Molecular Function: catalytic activity (GO:0003824);; Biological Process: trehalose biosynthetic process (GO:0005992);;	K16055|0.0e+00|nnu:104588804|K16055 trehalose 6-phosphate synthase/phosphatase [EC:2.4.1.15 3.1.3.12] | (RefSeq) alpha,alpha-trehalose-phosphate synthase [UDP-forming] 5-like	Starch and sucrose metabolism (ko00500)	[G]	Carbohydrate transport and metabolism	Glycosyltransferase family 20	Alpha,alpha-trehalose-phosphate synthase [UDP-forming] 5 OS=Arabidopsis thaliana OX=3702 GN=TPS5 PE=1 SV=2	G	Carbohydrate transport and metabolism	PREDICTED: alpha,alpha-trehalose-phosphate synthase [UDP-forming] 5-like [Nelumbo nucifera]
Nn1g00193	Nn1g00193	24.662	961	15.9999	604	17.56	784	56.2962	2082	74.8435	3308	40.1925	1703	130.65	5409	172.336	6479	105.303	4191	1.73e-09	1.65734	up	2.13e-34	3.22326	up	2.8e-06	-1.52675	down	[I]	Lipid transport and metabolism	Molecular Function: hydrolase activity (GO:0016787);;	K14493|7.0e-65|atr:18446855|K14493 gibberellin receptor GID1 [EC:3.-.-.-] | (RefSeq) gibberellin receptor GID1C	Plant hormone signal transduction (ko04075)	[V]	Defense mechanisms	alpha/beta hydrolase fold	Probable carboxylesterase 18 OS=Arabidopsis thaliana OX=3702 GN=CXE18 PE=1 SV=1	V	Defense mechanisms	PREDICTED: probable carboxylesterase 18 [Nelumbo nucifera]
Nn1g00221	Nn1g00221	12.7533	571	11.6329	501	13.6216	697	3.32828	143	2.15868	108	3.23032	156	0.017118	1	0	0	0.018788	2	1.15e-19	-1.97596	down	1.89e-31	-8.24779	down	8.67e-18	5.80646	up	[T]	Signal transduction mechanisms	--	K01076|1.5e-70|nnu:104604805|K01076 abhydrolase domain-containing protein 17 [EC:3.1.2.22] | (RefSeq) protein ABHD17B	--	[R]	General function prediction only	--	--	S	Function unknown	PREDICTED: protein ABHD17B [Nelumbo nucifera]
Nn1g00236	Nn1g00236	87.4892	4589	125.046	6110	101.251	6055	263.906	13323	388.742	23650	200.382	11464	791.158	44872	706.617	36452	658.632	35465	1.86e-08	1.57925	up	1e-58	3.23919	up	1.27e-07	-1.61468	down	[GI]	Carbohydrate transport and metabolism;; Lipid transport and metabolism	Molecular Function: enzyme inhibitor activity (GO:0004857);; Cellular Component: integral component of membrane (GO:0016021);; Molecular Function: pectinesterase activity (GO:0030599);; Biological Process: cell wall modification (GO:0042545);; Molecular Function: aspartyl esterase activity (GO:0045330);; Biological Process: pectin catabolic process (GO:0045490);;	K01051|1.8e-129|ccaj:109790884|K01051 pectinesterase [EC:3.1.1.11] | (RefSeq) pectinesterase-like	Pentose and glucuronate interconversions (ko00040)	--	--	Pectinesterase	Probable pectinesterase/pectinesterase inhibitor 61 OS=Arabidopsis thaliana OX=3702 GN=PME61 PE=2 SV=1	G	Carbohydrate transport and metabolism	PREDICTED: probable pectinesterase/pectinesterase inhibitor 61 [Nelumbo nucifera]
Nn1g00326	Nn1g00326	2.89377	185	2.51735	156	2.68992	197	1.26275	77	0.898474	66	1.08562	76	0.223122	16	0.172151	11	0.12808	9	1.09e-06	-1.16826	down	2.58e-23	-3.40393	down	8.88e-07	2.15333	up	[DPM]	Cell cycle control, cell division, chromosome partitioning;; Inorganic ion transport and metabolism;; Cell wall/membrane/envelope biogenesis	Molecular Function: copper ion binding (GO:0005507);; Biological Process: lignin catabolic process (GO:0046274);; Cellular Component: apoplast (GO:0048046);; Molecular Function: hydroquinone:oxygen oxidoreductase activity (GO:0052716);;	K05909|0.0e+00|nnu:104604732|K05909 laccase [EC:1.10.3.2] | (RefSeq) laccase-6	--	[Q]	Secondary metabolites biosynthesis, transport and catabolism	Multicopper oxidase	Laccase-6 OS=Arabidopsis thaliana OX=3702 GN=LAC6 PE=2 SV=1	Q	Secondary metabolites biosynthesis, transport and catabolism	PREDICTED: laccase-6 [Nelumbo nucifera]
Nn1g00329	Nn1g00329	588.224	29900	542.41	26124	511.617	29808	218.302	10412	238.792	13548	267.809	14780	2.07718	113	1.88356	89	2.72176	150	3.64e-19	-1.05287	down	0	-7.45817	down	2.93e-191	6.34623	up	--	--	Molecular Function: DNA binding (GO:0003677);; Cellular Component: nucleus (GO:0005634);;	K09422|6.3e-22|nnu:104604730|K09422 transcription factor MYB, plant | (RefSeq) myb-related protein 308-like	--	[K]	Transcription	Myb-like DNA-binding domain	Transcription factor MYB111 OS=Arabidopsis thaliana OX=3702 GN=MYB111 PE=1 SV=1	--	--	PREDICTED: myb-related protein 308-like [Nelumbo nucifera]
Nn1g00342	Nn1g00342	1.43693	175	1.13195	133	1.03909	145	0.365092	43	0.427081	59	0.494344	66	0.012786	2	0.072557	9	0.090416	12	2.44e-06	-1.31362	down	2.79e-14	-3.76097	down	0.000124651	2.2966	up	--	--	--	K22262|1.0e-125|qsu:112034235|K22262 WD repeat and FYVE domain-containing protein 3 | (RefSeq) protein SPIRRIG	--	[R]	General function prediction only	PPR repeat family	Pentatricopeptide repeat-containing protein At4g13650 OS=Arabidopsis thaliana OX=3702 GN=PCMP-H42 PE=2 SV=2	M	Cell wall/membrane/envelope biogenesis	PREDICTED: pentatricopeptide repeat-containing protein At2g13600-like [Nelumbo nucifera]
Nn1g00354	Nn1g00354	3.74776	52	4.99773	67	4.61169	73	9.60323	126	7.6092	120	10.1379	153	0.841911	13	0.149167	2	0.607212	9	7.17e-05	1.13147	up	3.44e-05	-2.47384	down	4.9e-12	3.4842	up	--	--	Molecular Function: calcium ion binding (GO:0005509);;	K24345|1.8e-63|nnu:104604713|K24345 calcium-binding protein KIC and related proteins | (RefSeq) calcium-binding protein KIC	--	[ZD]	Cytoskeleton;; Cell cycle control, cell division, chromosome partitioning	EF-hand domain pair	Calcium-binding protein KIC OS=Arabidopsis thaliana OX=3702 GN=KIC PE=1 SV=2	--	--	PREDICTED: calcium-binding protein KIC [Nelumbo nucifera]
Nn1g00388	Nn1g00388	70.5094	3645	55.4426	2791	56.9823	3448	27.8222	1405	21.5646	1289	30.1172	1749	2.49909	128	1.0677	49	1.62988	89	1.08e-09	-1.03973	down	1.72e-49	-4.72068	down	1.04e-24	3.60484	up	--	--	Molecular Function: monooxygenase activity (GO:0004497);; Molecular Function: iron ion binding (GO:0005506);; Cellular Component: integral component of membrane (GO:0016021);; Molecular Function: oxidoreductase activity, acting on paired donors, with incorporation or reduction of molecular oxygen (GO:0016705);; Molecular Function: heme binding (GO:0020037);;	K20619|3.1e-184|nnu:104604683|K20619 cytochrome P450 family 78 subfamily A | (RefSeq) cytochrome P450 78A9	--	[Q]	Secondary metabolites biosynthesis, transport and catabolism	Cytochrome P450	Cytochrome P450 78A9 OS=Arabidopsis thaliana OX=3702 GN=CYP78A9 PE=1 SV=1	Q	Secondary metabolites biosynthesis, transport and catabolism	PREDICTED: cytochrome P450 78A9 [Nelumbo nucifera]
Nn1g00413	Nn1g00413	3.88638	160	4.23165	167	2.58781	120	23.7613	909	38.4846	1765	18.8803	835	32.8244	1408	58.1724	2276	43.8262	1824	1.16e-19	2.94689	up	9.78e-43	4.03443	up	0.00614976	-1.00957	down	--	--	Molecular Function: isomerase activity (GO:0016853);;	K17911|5.1e-43|han:110903427|K17911 beta-carotene isomerase [EC:5.2.1.14] | (RefSeq) beta-carotene isomerase D27, chloroplastic-like	Carotenoid biosynthesis (ko00906)	--	--	Domain of unknown function (DUF4033)	Beta-carotene isomerase D27, chloroplastic OS=Medicago truncatula OX=3880 GN=D27 PE=1 SV=1	S	Function unknown	PREDICTED: beta-carotene isomerase D27, chloroplastic [Nelumbo nucifera]
Nn1g00454	Nn1g00454	2.43771	112	2.68598	119	2.56673	134	0.876298	39	1.22622	64	0.666986	34	0	0	0	0	0	0	0.000145317	-1.28056	down	8.87e-11	-7.86119	down	3.67e-09	5.42963	up	--	--	Molecular Function: protein dimerization activity (GO:0046983);;	K20558|5.0e-06|cpap:110823446|K20558 transcription factor SPEECHLESS | (RefSeq) transcription factor SPEECHLESS	MAPK signaling pathway - plant (ko04016)	--	--	Helix-loop-helix DNA-binding domain	Transcription factor bHLH70 OS=Arabidopsis thaliana OX=3702 GN=BHLH70 PE=2 SV=1	K	Transcription	PREDICTED: transcription factor bHLH57 isoform X2 [Nelumbo nucifera]
Nn1g00504	Nn1g00504	2.4091	143	1.05621	67	0.858234	71	2.43159	153	2.5383	184	3.27714	231	0.089499	6	0.115093	7	0.024246	2	0.00601592	1.06151	up	1.06e-08	-3.62239	down	1.54e-23	4.61436	up	--	--	Molecular Function: monooxygenase activity (GO:0004497);; Molecular Function: iron ion binding (GO:0005506);; Cellular Component: integral component of membrane (GO:0016021);; Molecular Function: oxidoreductase activity, acting on paired donors, with incorporation or reduction of molecular oxygen (GO:0016705);; Molecular Function: heme binding (GO:0020037);;	K23810|1.4e-85|vvi:100232891|K23810 (E)-8-carboxylinalool synthase [EC:1.14.14.-] | (RefSeq) GFH2; ripening-related P-450 enzyme-like	Monoterpenoid biosynthesis (ko00902)	[Q]	Secondary metabolites biosynthesis, transport and catabolism	Cytochrome P450	Cytochrome P450 76T24 OS=Catharanthus roseus OX=4058 GN=CYP76T24 PE=2 SV=1	Q	Secondary metabolites biosynthesis, transport and catabolism	PREDICTED: geraniol 8-hydroxylase-like [Nelumbo nucifera]
Nn1g00527	Nn1g00527	2.1978	187	2.23846	189	2.20765	219	2.96982	238	6.19523	609	3.20838	312	0.595539	60	0.162019	16	0.372429	39	0.00387192	1.00455	up	3.27e-05	-1.8906	down	7.88e-08	2.77462	up	--		Molecular Function: protein kinase activity (GO:0004672);; Molecular Function: ATP binding (GO:0005524);; Cellular Component: integral component of membrane (GO:0016021);; Molecular Function: polysaccharide binding (GO:0030247);;	K13416|4.1e-52|mdm:103416332|K13416 brassinosteroid insensitive 1-associated receptor kinase 1 [EC:2.7.10.1 2.7.11.1] | (RefSeq) BRASSINOSTEROID INSENSITIVE 1-associated receptor kinase 1-like isoform X1	MAPK signaling pathway - plant (ko04016);; Plant hormone signal transduction (ko04075);; Plant-pathogen interaction (ko04626)	[T]	Signal transduction mechanisms	Protein kinase domain	Rust resistance kinase Lr10 OS=Triticum aestivum OX=4565 GN=LRK10 PE=2 SV=1	T	Signal transduction mechanisms	PREDICTED: rust resistance kinase Lr10-like isoform X2 [Nelumbo nucifera]
Nn1g00534	Nn1g00534	18.6046	499	17.524	456	25.5897	787	3.67622	94	1.5472	48	4.27053	125	0	0	0	0	0	0	1.48e-11	-2.47613	down	1.59e-18	-9.78274	down	4.49e-12	6.15301	up	--	--	--	K08081|9.5e-13|thj:104827446|K08081 tropinone reductase I [EC:1.1.1.206] | (RefSeq) tropinone reductase homolog At5g06060-like	Tropane, piperidine and pyridine alkaloid biosynthesis (ko00960)	--	--	C2H2-type zinc finger	Zinc finger protein 10 OS=Arabidopsis thaliana OX=3702 GN=ZFP10 PE=2 SV=1	S	Function unknown	PREDICTED: uncharacterized protein LOC104610368 [Nelumbo nucifera]
Nn1g00583	Nn1g00583	10.954	203	11.9963	215	8.1228	172	75.2968	1321	131.964	2767	87.4927	1758	0.406814	8	1.29442	24	0.501323	10	2.96e-34	3.30129	up	6.71e-12	-3.28513	down	4.97e-50	6.41765	up	[E]	Amino acid transport and metabolism	Cellular Component: mitochondrion (GO:0005739);; Cellular Component: glycine cleavage complex (GO:0005960);; Biological Process: glycine decarboxylation via glycine cleavage system (GO:0019464);;	K02437|3.1e-87|nnu:104610395|K02437 glycine cleavage system H protein | (RefSeq) glycine cleavage system H protein, mitochondrial	Glycine, serine and threonine metabolism (ko00260);; Glyoxylate and dicarboxylate metabolism (ko00630);; Carbon metabolism (ko01200)	[E]	Amino acid transport and metabolism	Glycine cleavage H-protein	Glycine cleavage system H protein, mitochondrial OS=Flaveria anomala OX=35877 GN=GDCSH PE=2 SV=1	E	Amino acid transport and metabolism	PREDICTED: glycine cleavage system H protein, mitochondrial [Nelumbo nucifera]
Nn1g00617	Nn1g00617	0.501801	22	0.42631	18	0.826077	41	2.18899	86	6.8357	332	1.51162	70	13.3553	599	16.9167	683	7.68067	327	7.06e-05	2.39982	up	1.31e-29	4.72757	up	0.00102779	-1.97215	down	--	--	Molecular Function: molecular_function (GO:0003674);; Molecular Function: binding (GO:0005488);; Molecular Function: carbohydrate binding (GO:0030246);;	--	--	--	--	Phloem protein 2	Putative F-box protein PP2-B8 OS=Arabidopsis thaliana OX=3702 GN=PP2B8 PE=4 SV=1	S	Function unknown	PREDICTED: putative F-box protein PP2-B12 [Nelumbo nucifera]
Nn1g00619	Nn1g00619	0.711244	43	0.632541	45	0.694366	57	12.6395	751	20.1149	1195	9.71629	670	45.3469	3029	53.775	3327	45.4664	2918	3.71e-53	4.17729	up	3.35e-238	6.43846	up	2.98e-17	-2.1703	down	--	--	Molecular Function: purine nucleoside transmembrane transporter activity (GO:0015211);; Cellular Component: integral component of membrane (GO:0016021);;	K07893|2.2e-30|ini:109192111|K07893 Ras-related protein Rab-6A | (RefSeq) ras-related protein RABH1b-like	--	--	--	Purine nucleobase transmembrane transport	Probable purine permease 10 OS=Arabidopsis thaliana OX=3702 GN=PUP10 PE=2 SV=2	S	Function unknown	PREDICTED: probable purine permease 11 [Nelumbo nucifera]
Nn1g00631	Nn1g00631	19.3659	1027	15.0692	880	19.7088	1276	32.5555	1743	59.3671	3603	30.2533	1723	101.592	5805	133.161	6883	71.6231	4099	2.69e-05	1.21689	up	5.54e-29	2.85882	up	1.6e-05	-1.59448	down	[GR]	Carbohydrate transport and metabolism;; General function prediction only	Molecular Function: hydrolase activity (GO:0016787);;	K17623|6.2e-06|qsu:111991255|K17623 pseudouridine 5'-phosphatase [EC:3.1.3.96] | (RefSeq) putative uncharacterized hydrolase C1020.07	--	[R]	General function prediction only	Haloacid dehalogenase-like hydrolase	Haloacid dehalogenase-like hydrolase domain-containing protein Sgpp OS=Arabidopsis thaliana OX=3702 GN=SGPP PE=1 SV=2	S	Function unknown	PREDICTED: haloacid dehalogenase-like hydrolase domain-containing protein Sgpp isoform X1 [Nelumbo nucifera]
Nn1g00635	Nn1g00635	2.49176	211	2.59344	212	2.32347	225	0.715563	58	0.626202	60	0.854961	79	0.247864	23	0.225403	19	0.247093	22	7.34e-12	-1.59819	down	6.33e-26	-2.86841	down	0.00133321	1.2198	up	--	--	Molecular Function: molecular_function (GO:0003674);; Molecular Function: nucleic acid binding (GO:0003676);; Molecular Function: RNA binding (GO:0003723);; Molecular Function: catalytic activity (GO:0003824);; Molecular Function: nuclease activity (GO:0004518);; Molecular Function: endonuclease activity (GO:0004519);; Molecular Function: binding (GO:0005488);; Cellular Component: cellular_compon…	K23541|6.6e-60|cqi:110737210|K23541 Ca2+/H+ antiporter, TMEM165/GDT1 family | (RefSeq) pentatricopeptide repeat-containing protein At4g21065-like	--	[R]	General function prediction only	PPR repeat	Pentatricopeptide repeat-containing protein At1g32415, mitochondrial OS=Arabidopsis thaliana OX=3702 GN=PCMP-E56 PE=2 SV=1	G	Carbohydrate transport and metabolism	PREDICTED: pentatricopeptide repeat-containing protein At1g32415, mitochondrial [Nelumbo nucifera]
Nn1g00673	Nn1g00673	13.0445	321	12.1409	287	14.1723	393	4.47744	106	2.06103	59	6.3137	168	0.384725	12	0.12586	3	0.29132	8	0.000251416	-1.41574	down	4.2e-38	-4.91549	down	1.91e-07	3.19842	up	--	--	Cellular Component: integral component of membrane (GO:0016021);;	K15082|1.0e-40|cic:CICLE_v10010155mg|K15082 DNA repair protein RAD7 | (RefSeq) hypothetical protein	--	--	--	--	--	--	--	PREDICTED: uncharacterized protein LOC104609867 [Nelumbo nucifera]
Nn1g00687	Nn1g00687	21.453	1969	22.931	2032	21.439	2240	39.8271	3431	61.1258	6235	33.748	3375	111.577	9859	139.083	11618	90.7602	8074	3.52e-06	1.13032	up	1.3e-39	2.69538	up	6.5e-07	-1.53538	down	[O]	Posttranslational modification, protein turnover, chaperones	Molecular Function: ATP-dependent peptidase activity (GO:0004176);; Molecular Function: serine-type endopeptidase activity (GO:0004252);; Molecular Function: ATP binding (GO:0005524);; Cellular Component: peroxisomal matrix (GO:0005782);; Biological Process: misfolded or incompletely synthesized protein catabolic process (GO:0006515);; Biological Process: protein processing (GO:0016485);; Biologi…	K01338|0.0e+00|nnu:104609856|K01338 ATP-dependent Lon protease [EC:3.4.21.53] | (RefSeq) lon protease homolog 2, peroxisomal	--	[O]	Posttranslational modification, protein turnover, chaperones	Lon protease (S16) C-terminal proteolytic domain	Lon protease homolog 2, peroxisomal OS=Spinacia oleracea OX=3562 PE=2 SV=2	O	Posttranslational modification, protein turnover, chaperones	PREDICTED: lon protease homolog 2, peroxisomal [Nelumbo nucifera]
Nn1g00698	Nn1g00698	10.5989	488	9.49502	433	9.20845	511	2.48852	114	2.24217	112	3.48974	184	0.459083	19	0.513933	23	0.609959	31	7.64e-13	-1.68148	down	1.39e-55	-3.81835	down	1.18e-07	2.05484	up	--	--	--	K01593|9.5e-06|mtr:MTR_7g058700|K01593 aromatic-L-amino-acid/L-tryptophan decarboxylase [EC:4.1.1.28 4.1.1.105] | (RefSeq) tyrosine/DOPA decarboxylase	Tyrosine metabolism (ko00350);; Phenylalanine metabolism (ko00360);; Tryptophan metabolism (ko00380);; Isoquinoline alkaloid biosynthesis (ko00950);; Betalain biosynthesis (ko00965)	--	--	Protein of unknown function (DUF674)	--	L	Replication, recombination and repair	PREDICTED: uncharacterized protein LOC104609852 isoform X1 [Nelumbo nucifera]
Nn1g00765	Nn1g00765	72.2858	2633	60.1973	2190	76.5567	3259	244.795	8646	232.573	9697	203.895	8228	394.904	15365	550.219	19380	466.581	17523	1.18e-40	1.82225	up	8.77e-78	3.15537	up	1.72e-13	-1.33175	down	--	--	Molecular Function: molecular_function (GO:0003674);; Molecular Function: transcription factor activity, sequence-specific DNA binding (GO:0003700);; Molecular Function: binding (GO:0005488);; Molecular Function: protein binding (GO:0005515);; Cellular Component: cellular_component (GO:0005575);; Cellular Component: intracellular (GO:0005622);; Cellular Component: cell (GO:0005623);; Cellular Com…	--	--	--	--	--	Light-harvesting complex-like protein 3 isotype 1, chloroplastic OS=Arabidopsis thaliana OX=3702 GN=LIL3.1 PE=1 SV=1	S	Function unknown	PREDICTED: uncharacterized protein LOC104609812 [Nelumbo nucifera]
Nn1g00771	Nn1g00771	16.1289	806	16.5942	760	22.4786	1351	1.41611	78	0.924023	64	2.83193	152	0.054388	5	0.383081	20	0.258238	15	9.45e-20	-3.08843	down	4.6e-41	-5.61038	down	0.000152963	2.29636	up	--	--	Cellular Component: integral component of membrane (GO:0016021);; Molecular Function: transmembrane transporter activity (GO:0022857);;	--	--	--	--	--	WAT1-related protein At1g68170 OS=Arabidopsis thaliana OX=3702 GN=At1g68170 PE=3 SV=1	S	Function unknown	PREDICTED: WAT1-related protein At5g64700-like [Nelumbo nucifera]
Nn1g00831	Nn1g00831	3.00438	184	2.66566	158	2.76623	194	0.747761	44	0.933329	65	0.90263	60	0.205457	14	0.287411	17	0.288376	18	5.46e-11	-1.54583	down	4.28e-23	-2.96865	down	0.000820898	1.36327	up	--	--	--	--	--	--	--	--	--	S	Function unknown	PREDICTED: uncharacterized protein LOC104611744 [Nelumbo nucifera]
Nn1g00867	Nn1g00867	2.55443	170	2.13733	137	1.62312	123	0.59417	38	0.621628	47	1.21692	87	0.237237	18	0.216805	14	0.095453	7	0.00239799	-1.1965	down	1.48e-11	-2.95767	down	0.00503088	1.62923	up	--	--	Molecular Function: molecular_function (GO:0003674);; Molecular Function: nucleic acid binding (GO:0003676);; Molecular Function: RNA binding (GO:0003723);; Molecular Function: catalytic activity (GO:0003824);; Molecular Function: nuclease activity (GO:0004518);; Molecular Function: endonuclease activity (GO:0004519);; Molecular Function: binding (GO:0005488);; Cellular Component: cellular_compon…	K22733|1.2e-72|cit:102612526|K22733 magnesium transporter | (RefSeq) uncharacterized protein LOC102612526	--	[R]	General function prediction only	PPR repeat	Pentatricopeptide repeat-containing protein At2g44880 OS=Arabidopsis thaliana OX=3702 GN=PCMP-E9 PE=2 SV=2	J	Translation, ribosomal structure and biogenesis	PREDICTED: pentatricopeptide repeat-containing protein At2g44880 [Nelumbo nucifera]
Nn1g00942	Nn1g00942	2.35937	176	1.98835	141	2.17475	187	5.14263	353	5.60371	478	4.16788	342	12.5785	953	10.8018	768	7.46382	559	1.12e-10	1.30635	up	2.8e-23	2.62721	up	6.36e-06	-1.30892	down	[M]	Cell wall/membrane/envelope biogenesis	Biological Process: protein glycosylation (GO:0006486);; Molecular Function: transferase activity, transferring glycosyl groups (GO:0016757);;	K18789|2.4e-87|psom:113275449|K18789 xylogalacturonan beta-1,3-xylosyltransferase [EC:2.4.2.41] | (RefSeq) probable glycosyltransferase At5g20260	--	[GMW]	Carbohydrate transport and metabolism;; Cell wall/membrane/envelope biogenesis;; Extracellular structures	Exostosin family	Probable glycosyltransferase At5g03795 OS=Arabidopsis thaliana OX=3702 GN=At5g03795 PE=3 SV=2	--	--	PREDICTED: probable glycosyltransferase At5g03795 isoform X2 [Nelumbo nucifera]
Nn1g00950	Nn1g00950	10.653	1182	11.0337	1168	9.86262	1252	2.38914	257	1.75325	220	3.17116	382	0.050002	7	0.086093	10	0.029282	4	1.91e-17	-1.9424	down	7.75e-88	-6.88669	down	2.36e-25	4.73564	up	[N]	Cell motility	Molecular Function: protein serine/threonine kinase activity (GO:0004674);; Molecular Function: ATP binding (GO:0005524);; Cellular Component: integral component of membrane (GO:0016021);;	K22911|1.8e-105|spen:107031166|K22911 thiamine phosphate phosphatase / amino-HMP aminohydrolase [EC:3.1.3.100 3.5.99.-] | (RefSeq) bifunctional TH2 protein, mitochondrial	Thiamine metabolism (ko00730)	--	--	Protein kinase domain	Leucine-rich repeat receptor-like protein kinase TDR OS=Arabidopsis thaliana OX=3702 GN=TDR PE=1 SV=1	T	Signal transduction mechanisms	PREDICTED: leucine-rich repeat receptor-like protein kinase TDR isoform X1 [Nelumbo nucifera]
Nn1g00980	Nn1g00980	3.4044	180	2.89734	147	3.59486	223	0.582451	30	0.865833	55	0.631626	34	0.060326	4	0.058949	4	0.101581	6	9.7e-12	-2.05335	down	3.08e-25	-4.73438	down	2.64e-05	2.49451	up	[G]	Carbohydrate transport and metabolism	Cellular Component: integral component of membrane (GO:0016021);;	--	--	--	--	AAA domain	--	G	Carbohydrate transport and metabolism	PREDICTED: uncharacterized protein LOC104602358 isoform X2 [Nelumbo nucifera]
Nn1g01070	Nn1g01070	3.45028	113	3.86309	123	3.42814	129	1.21326	38	1.35298	51	1.14784	41	0	0	0	0	0	0	1.1e-06	-1.36626	down	8.96e-11	-7.86154	down	2.36e-09	5.44713	up	--	--	--	--	--	--	--	--	--	S	Function unknown	PREDICTED: uncharacterized protein LOC104602302 [Nelumbo nucifera]
Nn1g01110	Nn1g01110	62.2165	1413	73.1905	1613	90.0288	2351	125.741	2710	211.748	5420	91.0114	2238	641.354	15494	613.392	13400	336.659	7793	0.00260163	1.01504	up	5.61e-24	3.21763	up	2.28e-07	-2.13148	down	--	--	Molecular Function: enzyme inhibitor activity (GO:0004857);;	K01051|7.8e-19|vvi:104880619|K01051 pectinesterase [EC:3.1.1.11] | (RefSeq) pectinesterase	Pentose and glucuronate interconversions (ko00040)	--	--	Plant invertase/pectin methylesterase inhibitor	21 kDa protein OS=Daucus carota OX=4039 PE=2 SV=1	S	Function unknown	PREDICTED: 21 kDa protein-like [Nelumbo nucifera]
Nn1g01120	Nn1g01120	4.65608	153	4.75493	147	4.44072	164	1.58662	50	1.23492	47	2.21424	80	0.057992	3	0.122998	5	0.140582	6	2.51e-05	-1.26363	down	3.02e-23	-4.50624	down	7.66e-08	3.04716	up	--	--	Molecular Function: DNA binding (GO:0003677);; Cellular Component: nucleus (GO:0005634);;	K09422|2.1e-88|nnu:104602266|K09422 transcription factor MYB, plant | (RefSeq) protein ODORANT1-like	--	--	--	--	--	--		PREDICTED: protein ODORANT1-like [Nelumbo nucifera]
Nn1g01134	Nn1g01134	286.712	13970	328.436	15324	232.156	12884	82.5995	3809	66.5792	3848	98.4041	5311	6.54934	328	8.35367	396	9.09095	457	3.6e-16	-1.6007	down	1.02e-114	-4.69949	down	1.43e-44	3.0585	up	--	--	--	--	--	--	--	Phosphate-induced protein 1 conserved region	Protein EXORDIUM-like 3 OS=Arabidopsis thaliana OX=3702 GN=EXL3 PE=2 SV=1	S	Function unknown	PREDICTED: protein EXORDIUM-like 3 [Nelumbo nucifera]
Nn1g01154	Nn1g01154	0.581246	71	0.289207	36	0.312043	43	2.09522	257	2.9534	486	1.71212	261	3.99177	535	5.31281	887	5.09034	758	1.19e-13	2.71969	up	3.1e-35	4.27365	up	2.25e-05	-1.46633	down	--	--	Molecular Function: protein serine/threonine phosphatase activity (GO:0004722);; Molecular Function: metal ion binding (GO:0046872);;	K14497|3.9e-169|nnu:104590808|K14497 protein phosphatase 2C [EC:3.1.3.16] | (RefSeq) probable protein phosphatase 2C 75	MAPK signaling pathway - plant (ko04016);; Plant hormone signal transduction (ko04075)	[T]	Signal transduction mechanisms	Protein phosphatase 2C	Probable protein phosphatase 2C 75 OS=Arabidopsis thaliana OX=3702 GN=AHG1 PE=1 SV=1	T	Signal transduction mechanisms	PREDICTED: probable protein phosphatase 2C 75 isoform X4 [Nelumbo nucifera]
Nn1g01227	Nn1g01227	4.9386	159	5.52274	173	4.20998	156	1.49472	46	1.34861	50	2.32682	82	0.058515	3	0	0	0	0	2.88e-05	-1.3353	down	2.82e-17	-6.45986	down	2.56e-09	4.57145	up	--	--	Cellular Component: integral component of membrane (GO:0016021);;	--	--	--	--	Petal formation-expressed	Probable F-box protein At4g22030 OS=Arabidopsis thaliana OX=3702 GN=At4g22030 PE=4 SV=1	S	Function unknown	PREDICTED: probable F-box protein At4g22030 [Nelumbo nucifera]
Nn1g01242	Nn1g01242	0.473246	39	0.339927	30	0.754157	69	35.3993	2336	32.7379	2582	25.1216	1899	231.38	17083	203.138	13620	106.79	7580	4.26e-103	5.63818	up	1.16e-105	8.48362	up	1.47e-15	-2.77951	down	[I]	Lipid transport and metabolism	Molecular Function: iron ion binding (GO:0005506);; Biological Process: lipid biosynthetic process (GO:0008610);; Cellular Component: integral component of membrane (GO:0016021);; Molecular Function: oxidoreductase activity (GO:0016491);;	K15404|0.0e+00|nnu:104590840|K15404 aldehyde decarbonylase [EC:4.1.99.5] | (RefSeq) protein ECERIFERUM 1-like	Cutin, suberine and wax biosynthesis (ko00073)	--	--	WAX2 C-terminal domain	Very-long-chain aldehyde decarbonylase GL1-4 OS=Oryza sativa subsp. indica OX=39946 GN=GL1-4 PE=3 SV=1	S	Function unknown	PREDICTED: protein ECERIFERUM 1-like [Nelumbo nucifera]
Nn1g01253	Nn1g01253	2.00455	63	3.32051	99	3.13384	111	5.65751	166	6.34642	220	4.45982	149	55.1429	1800	24.0772	709	13.8582	435	0.00126279	1.04074	up	7.46e-13	3.78881	up	2.04e-07	-2.66454	down	--	--	--	K15198|7.1e-53|sbi:8069083|K15198 transcription factor TFIIIB component B'' | (RefSeq) uncharacterized protein LOC8069083 isoform X1	--	--	--	Myelodysplasia-myeloid leukemia factor 1-interacting protein	--	S	Function unknown	PREDICTED: myeloid leukemia factor 1-like [Nelumbo nucifera]
Nn1g01258	Nn1g01258	99.9841	7824	84.8012	6458	81.5765	7281	8.65817	656	4.656	476	9.3455	952	0.113601	10	0.13436	15	0.840976	69	5.79e-37	-3.20811	down	9.99e-36	-7.18024	down	2.37e-09	3.75282	up	--	--	Molecular Function: protein kinase activity (GO:0004672);; Molecular Function: ATP binding (GO:0005524);; Cellular Component: integral component of membrane (GO:0016021);;	K13418|2.0e-18|hbr:110657775|K13418 somatic embryogenesis receptor kinase 1 [EC:2.7.10.1 2.7.11.1] | (RefSeq) somatic embryogenesis receptor kinase 1-like isoform X1	--	--	--	Protein tyrosine and serine/threonine kinase	Probable receptor-like protein kinase At1g11050 OS=Arabidopsis thaliana OX=3702 GN=At1g11050 PE=2 SV=1	T	Signal transduction mechanisms	PREDICTED: LRR receptor-like serine/threonine-protein kinase GSO2 [Nelumbo nucifera]
Nn1g01275	Nn1g01275	739.061	31301	795.822	32696	842.464	41081	237.845	9663	311.229	15066	241.108	11142	1.82648	92	2.67325	121	2.64892	121	3.11e-19	-1.44553	down	0	-7.81412	down	5.02e-184	6.29924	up	[Q]	Secondary metabolites biosynthesis, transport and catabolism	Molecular Function: metal ion binding (GO:0046872);; Molecular Function: dioxygenase activity (GO:0051213);;	K05277|2.3e-93|nnu:104596229|K05277 anthocyanidin synthase [EC:1.14.20.4] | (RefSeq) leucoanthocyanidin dioxygenase-like	Flavonoid biosynthesis (ko00941)	[QR]	Secondary metabolites biosynthesis, transport and catabolism;; General function prediction only	non-haem dioxygenase in morphine synthesis N-terminal	Leucoanthocyanidin dioxygenase OS=Vitis vinifera OX=29760 PE=2 SV=1	Q	Secondary metabolites biosynthesis, transport and catabolism	anthocyanidin synthase 1 [Nelumbo lutea]
Nn1g01288	Nn1g01288	9.50334	813	10.9418	908	8.53717	838	1.48754	121	0.445447	44	1.87627	175	0.037096	4	0.085559	8	0	0	7.12e-10	-2.65849	down	2.56e-52	-7.12535	down	2.45e-06	3.73287	up	--	--	--	--	--	--	--	Domain of unknown function (DUF4378)	--	S	Function unknown	PREDICTED: uncharacterized protein LOC104596220 [Nelumbo nucifera]
Nn1g01358	Nn1g01358	15.3758	960	15.7035	950	12.9109	924	2.05482	122	2.40835	171	2.15696	147	0.209804	14	0.17769	11	0.132054	9	1.14e-52	-2.57902	down	2.1e-82	-5.87938	down	1.05e-18	3.21978	up	--	--	Molecular Function: protein binding (GO:0005515);; Cellular Component: cellular_component (GO:0005575);; Cellular Component: intracellular (GO:0005622);; Cellular Component: cell (GO:0005623);; Cellular Component: nucleus (GO:0005634);; Cellular Component: cytoplasm (GO:0005737);; Cellular Component: organelle (GO:0043226);; Cellular Component: membrane-bounded organelle (GO:0043227);; Cellular C…	--	--	[S]	Function unknown	Armadillo/beta-catenin-like repeat	--	J	Translation, ribosomal structure and biogenesis	PREDICTED: ARMADILLO BTB ARABIDOPSIS PROTEIN 1 [Nelumbo nucifera]
Nn1g01374	Nn1g01374	1.65251	156	0.908121	112	1.58339	162	6.30548	633	10.7702	1231	4.76755	518	21.2462	2250	27.6328	2540	23.7084	2480	4.11e-14	2.48683	up	7.08e-171	4.53234	up	9.08e-09	-1.94201	down	--	--	Molecular Function: methyltransferase activity (GO:0008168);; Cellular Component: integral component of membrane (GO:0016021);; Biological Process: methylation (GO:0032259);;	K23872|2.6e-106|ats:109765487|K23872 putative homogalacturonan methyltransferase [EC:2.1.1.-] | (RefSeq) LOC109765487; probable methyltransferase PMT13	--	--	--	Putative S-adenosyl-L-methionine-dependent methyltransferase	Probable methyltransferase PMT15 OS=Arabidopsis thaliana OX=3702 GN=At4g00750 PE=2 SV=1	S	Function unknown	PREDICTED: probable methyltransferase PMT15 isoform X3 [Nelumbo nucifera]
Nn1g01465	Nn1g01465	0.258078	14	0.107238	6	0.233121	15	1.32388	67	2.64083	159	0.659658	38	12.3138	693	7.12005	364	1.54737	84	1.04e-05	2.68666	up	1.47e-13	5.24916	up	0.00225657	-2.21343	down	--	--	--	K03239|4.1e-47|rcu:8276560|K03239 translation initiation factor eIF-2B subunit alpha | (RefSeq) methylthioribose-1-phosphate isomerase	RNA transport (ko03013)	--	--	LURP-one-related	Protein LURP-one-related 11 OS=Arabidopsis thaliana OX=3702 GN=At3g14260 PE=2 SV=1	S	Function unknown	PREDICTED: protein LURP-one-related 11-like [Nelumbo nucifera]
Nn1g01468	Nn1g01468	8.74565	112	8.42342	105	10.2982	150	20.6718	250	35.5853	512	26.7477	370	65.8151	872	65.746	797	34.8979	446	8.25e-10	1.67844	up	5.39e-20	2.97313	up	0.000795294	-1.26048	down	--	--	Biological Process: metal ion transport (GO:0030001);; Molecular Function: metal ion binding (GO:0046872);;	--	--	--	--	--	--	--	--	heavy metal-associated isoprenylated plant protein 39 [Elaeis guineensis]
Nn1g01490	Nn1g01490	99.2029	3305	96.115	3073	91.9081	3682	288.333	9048	317.03	11923	200.989	7281	1017.27	35239	1114.68	38200	658.505	23376	6.15e-16	1.57566	up	6.85e-54	3.71431	up	3.18e-12	-2.10804	down	[VI]	Defense mechanisms;; Lipid transport and metabolism	Molecular Function: glutathione peroxidase activity (GO:0004602);; Biological Process: response to oxidative stress (GO:0006979);;	K00432|7.9e-84|nnu:104596087|K00432 glutathione peroxidase [EC:1.11.1.9] | (RefSeq) GP; probable phospholipid hydroperoxide glutathione peroxidase	Glutathione metabolism (ko00480);; Arachidonic acid metabolism (ko00590)	[O]	Posttranslational modification, protein turnover, chaperones	Glutathione peroxidase	Probable phospholipid hydroperoxide glutathione peroxidase OS=Spinacia oleracea OX=3562 PE=2 SV=1	O	Posttranslational modification, protein turnover, chaperones	PREDICTED: probable phospholipid hydroperoxide glutathione peroxidase isoform X1 [Nelumbo nucifera]
Nn1g01498	Nn1g01498	0.931668	47	0.709812	35	0.845602	59	8.9011	368	8.63872	471	7.0358	333	0.219111	11	0	0	0.071334	5	4.14e-35	3.10846	up	0.00292574	-2.50527	down	2.23e-25	5.44219	up	--	--	Molecular Function: GTPase activity (GO:0003924);; Molecular Function: structural constituent of cytoskeleton (GO:0005200);; Molecular Function: GTP binding (GO:0005525);; Cellular Component: cytoplasm (GO:0005737);; Cellular Component: microtubule (GO:0005874);; Biological Process: microtubule-based process (GO:0007017);;	K07375|2.1e-238|nnu:104596080|K07375 tubulin beta | (RefSeq) tubulin beta chain-like	Phagosome (ko04145)	[Z]	Cytoskeleton	Tubulin/FtsZ family, GTPase domain	Tubulin beta-7 chain OS=Gossypium hirsutum OX=3635 PE=2 SV=1	Z	Cytoskeleton	PREDICTED: tubulin beta chain-like [Nelumbo nucifera]
Nn1g01528	Nn1g01528	16.4998	597	15.8609	556	15.3848	638	5.59502	193	3.76144	155	8.04428	317	0.039199	2	0	0	0	0	5.63e-06	-1.30161	down	3.43e-28	-8.64966	down	1.89e-20	6.63171	up	[Q]	Secondary metabolites biosynthesis, transport and catabolism	Molecular Function: metal ion binding (GO:0046872);; Molecular Function: dioxygenase activity (GO:0051213);;	K04124|1.4e-38|atr:18424978|K04124 gibberellin 3beta-dioxygenase [EC:1.14.11.15] | (RefSeq) gibberellin 3-beta-dioxygenase 3	Diterpenoid biosynthesis (ko00904)	[QR]	Secondary metabolites biosynthesis, transport and catabolism;; General function prediction only	2OG-Fe(II) oxygenase superfamily	Gibberellin 20-oxidase-like protein OS=Arabidopsis thaliana OX=3702 GN=At5g51310 PE=2 SV=1	Q	Secondary metabolites biosynthesis, transport and catabolism	PREDICTED: gibberellin 3-beta-dioxygenase 4 [Nelumbo nucifera]
Nn1g01557	Nn1g01557	10.5196	798	11.9022	792	11.1073	968	18.0205	1350	23.2419	2019	16.974	1461	46.1212	3680	40.2378	2955	23.3699	1860	1.36e-09	1.00473	up	4.73e-14	2.18147	up	0.000316467	-1.16935	down	--	--	--	--	--	--	--	--	--	S	Function unknown	PREDICTED: uncharacterized protein LOC104596031 [Nelumbo nucifera]
Nn1g01569	Nn1g01569	14.913	637	15.241	631	20.3186	995	33.6571	1365	45.7253	2216	22.8784	1063	259.257	11764	191.591	7896	144.722	6313	0.000153899	1.12032	up	1.1e-42	3.96388	up	7.7e-15	-2.77782	down	--	--	--	K19747|1.5e-47|vvi:100243942|K19747 BAHD acyltransferase [EC:2.3.1.-] | (RefSeq) BAHD acyltransferase DCR	--	--	--	C2 domain	--	S	Function unknown	PREDICTED: protein SRC2 homolog [Nelumbo nucifera]
Nn1g01593	Nn1g01593	6.95549	429	7.14138	427	6.20332	439	0.594655	35	0.718958	51	0.779177	53	0.128307	9	0.031707	2	0	0	6.85e-47	-3.0895	down	1.5e-34	-6.26176	down	0.000710104	2.74885	up	--	--	Cellular Component: nucleus (GO:0005634);;	K22377|5.8e-16|smo:SELMODRAFT_437336|K22377 E3 ubiquitin-protein ligase listerin [EC:2.3.2.27] | (RefSeq) hypothetical protein	--	--	--	CCT motif	Zinc finger protein CONSTANS-LIKE 4 OS=Arabidopsis thaliana OX=3702 GN=COL4 PE=2 SV=2	K	Transcription	PREDICTED: uncharacterized protein LOC104596005 [Nelumbo nucifera]
Nn1g01619	Nn1g01619	0.51781	59	0.364963	40	0.854281	110	1.99301	210	1.73603	218	1.22525	150	7.80256	931	9.04759	980	3.86153	441	7.43e-05	1.54733	up	6.26e-19	3.92566	up	4.65e-09	-2.31103	down	[T]	Signal transduction mechanisms	Molecular Function: protein kinase activity (GO:0004672);; Molecular Function: ATP binding (GO:0005524);; Cellular Component: integral component of membrane (GO:0016021);;	K13435|2.5e-100|spen:107018783|K13435 serine/threonine-protein kinase Pto | (RefSeq) receptor-like protein kinase HERK 1 isoform X2	Plant-pathogen interaction (ko04626)	[T]	Signal transduction mechanisms	Protein tyrosine and serine/threonine kinase	Probable receptor-like protein kinase At5g24010 OS=Arabidopsis thaliana OX=3702 GN=At5g24010 PE=1 SV=1	T	Signal transduction mechanisms	PREDICTED: probable receptor-like protein kinase At5g24010 [Nelumbo nucifera]
Nn1g01624	Nn1g01624	3.53775	250	4.37974	299	3.0437	246	1.33066	89	2.05134	164	1.43436	110	0.238392	18	0.277892	19	0.391466	29	0.000461171	-1.0355	down	1.22e-21	-3.12219	down	2.54e-07	2.01447	up	--	--	--	K22733|1.8e-80|cit:102612526|K22733 magnesium transporter | (RefSeq) uncharacterized protein LOC102612526	--	[R]	General function prediction only	PPR repeat	Pentatricopeptide repeat-containing protein At3g46790, chloroplastic OS=Arabidopsis thaliana OX=3702 GN=CRR2 PE=2 SV=1	S	Function unknown	PREDICTED: pentatricopeptide repeat-containing protein At3g46790, chloroplastic-like [Nelumbo nucifera]
Nn1g01654	Nn1g01654	29.7357	315	24.586	252	25.255	306	9.84972	99	7.37217	89	10.6751	123	1.64541	19	1.5622	16	1.53504	17	6.94e-10	-1.36629	down	2.16e-37	-3.58598	down	4.88e-09	2.15353	up	--	--	Molecular Function: zinc ion binding (GO:0008270);;	--	--	--	--	GRF zinc finger	--	--	--	--
Nn1g01668	Nn1g01668	6.16511	339	15.8814	845	21.1727	1332	0.675016	36	2.65057	166	2.00856	120	0.237943	14	0.072771	4	0	0	5.42e-07	-2.6561	down	3.55e-07	-5.73355	down	0.000448272	3.03276	up	[E]	Amino acid transport and metabolism	Molecular Function: catalytic activity (GO:0003824);; Biological Process: biosynthetic process (GO:0009058);; Molecular Function: pyridoxal phosphate binding (GO:0030170);;	K20772|4.9e-290|nnu:104600214|K20772 1-aminocyclopropane-1-carboxylate synthase 1/2/6 [EC:4.4.1.14] | (RefSeq) 1-aminocyclopropane-1-carboxylate synthase-like	Cysteine and methionine metabolism (ko00270);; MAPK signaling pathway - plant (ko04016)	[T]	Signal transduction mechanisms	Aminotransferase class I and II	1-aminocyclopropane-1-carboxylate synthase 1 OS=Prunus mume OX=102107 GN=ACS1 PE=2 SV=1	T	Signal transduction mechanisms	PREDICTED: 1-aminocyclopropane-1-carboxylate synthase-like [Nelumbo nucifera]
Nn1g01720	Nn1g01720	3.88669	399	3.92118	389	3.36815	396	1.61259	158	1.64686	191	1.57107	166	0.470632	50	0.338746	34	0.317556	33	2.15e-10	-1.09777	down	2.49e-30	-2.87157	down	3.33e-09	1.73874	up	--	--	Molecular Function: zinc ion binding (GO:0008270);;	K22262|3.0e-97|qsu:112034235|K22262 WD repeat and FYVE domain-containing protein 3 | (RefSeq) protein SPIRRIG	--	[R]	General function prediction only	PPR repeat family	Pentatricopeptide repeat-containing protein At5g16860 OS=Arabidopsis thaliana OX=3702 GN=PCMP-H92 PE=2 SV=1	E	Amino acid transport and metabolism	PREDICTED: pentatricopeptide repeat-containing protein At5g16860 [Nelumbo nucifera]
Nn1g01752	Nn1g01752	0.111984	7	0	0	0.121454	9	1.6736	98	1.66045	117	1.09449	74	4.5484	299	1.80764	108	4.3915	277	3.34e-11	3.85702	up	3.49e-17	5.64001	up	0.000702288	-1.52281	down	--	--	Biological Process: malate transport (GO:0015743);; Cellular Component: integral component of membrane (GO:0016021);;	K03695|1.4e-22|egr:104416563|K03695 ATP-dependent Clp protease ATP-binding subunit ClpB | (RefSeq) chaperone protein ClpB1-like	--	[R]	General function prediction only	Aluminium activated malate transporter	Aluminum-activated malate transporter 9 OS=Arabidopsis thaliana OX=3702 GN=ALMT9 PE=2 SV=1	G	Carbohydrate transport and metabolism	PREDICTED: aluminum-activated malate transporter 9-like [Nelumbo nucifera]
Nn1g01753	Nn1g01753	5.25999	740	4.79528	655	4.11638	661	1.04932	141	1.10303	175	1.21658	185	0.617422	92	0.312602	43	0.343023	50	2.32e-30	-1.93143	down	7.7e-21	-2.99837	down	0.00658364	1.03814	up	--	--	--	K03155|0.0e+00|nnu:104600273|K03155 timeless | (RefSeq) protein timeless homolog	--	[L]	Replication, recombination and repair	Timeless protein	--	L	Replication, recombination and repair	PREDICTED: protein timeless homolog isoform X1 [Nelumbo nucifera]
Nn1g01757	Nn1g01757	4.2449	206	4.70016	214	5.6401	307	10.9137	497	11.218	606	11.943	622	0.720543	37	0.881058	42	0.685449	32	6.6e-15	1.34074	up	1.08e-15	-2.22586	down	6.1e-56	3.54465	up	[R]	General function prediction only	Cellular Component: integral component of membrane (GO:0016021);;	K23541|7.4e-23|ccp:CHC_T00007979001|K23541 Ca2+/H+ antiporter, TMEM165/GDT1 family | (RefSeq) hypothetical protein	--	[S]	Function unknown	Uncharacterized protein family UPF0016	GDT1-like protein 1, chloroplastic OS=Oryza sativa subsp. indica OX=39946 GN=OsI_00941 PE=3 SV=2	S	Function unknown	PREDICTED: GDT1-like protein 1, chloroplastic isoform X1 [Nelumbo nucifera]
Nn1g01761	Nn1g01761	0.409788	65	0.561542	68	0.297916	53	2.20988	308	0.351943	64	2.07087	331	0.066407	9	0.042958	4	0.073551	10	0.0014154	1.84534	up	8.38e-07	-2.52049	down	9.23e-10	4.107	up	--	--	Molecular Function: chaperone binding (GO:0051087);;	--	--	--	--	--	--	S	Function unknown	PREDICTED: BAG family molecular chaperone regulator 6 [Nelumbo nucifera]
Nn1g01762	Nn1g01762	2.58435	248	2.26431	211	1.66572	184	0.916762	84	0.779036	85	0.906449	95	0.187158	20	0.206227	20	0.18051	18	9.38e-06	-1.17118	down	1.33e-19	-2.99427	down	3.07e-07	1.77533	up	[T]	Signal transduction mechanisms	Molecular Function: solute:proton antiporter activity (GO:0015299);; Cellular Component: integral component of membrane (GO:0016021);;	--	--	[P]	Inorganic ion transport and metabolism	Sodium/hydrogen exchanger family	Cation/H(+) antiporter 18 OS=Arabidopsis thaliana OX=3702 GN=CHX18 PE=2 SV=1	P	Inorganic ion transport and metabolism	PREDICTED: cation/H(+) antiporter 18 isoform X1 [Nelumbo nucifera]
Nn1g01767	Nn1g01767	14.7609	1046	12.8229	858	11.5717	911	6.04294	401	5.42602	413	5.78765	426	1.51904	114	2.07003	135	1.75078	125	5.24e-12	-1.07624	down	5.84e-39	-2.45016	down	5.08e-12	1.35431	up	--	--	Cellular Component: cellular_component (GO:0005575);; Cellular Component: intracellular (GO:0005622);; Cellular Component: cell (GO:0005623);; Cellular Component: cytoplasm (GO:0005737);; Cellular Component: plasma membrane (GO:0005886);; Cellular Component: chloroplast (GO:0009507);; Cellular Component: plastid (GO:0009536);; Cellular Component: membrane (GO:0016020);; Cellular Component: organe…	--	--	--	--	--	Uncharacterized protein At5g41620 OS=Arabidopsis thaliana OX=3702 GN=At5g41620 PE=2 SV=2	S	Function unknown	PREDICTED: uncharacterized protein At5g41620 [Nelumbo nucifera]
Nn1g01802	Nn1g01802	1.14126	16	0.467157	7	0.367212	6	19.4219	259	27.6721	441	17.5051	267	3.55264	53	7.65082	104	5.47368	79	7.65e-33	4.87895	up	9.31e-10	3.38145	up	1.78e-05	1.60201	up	--	--	--	--	--	--	--	--	--	S	Function unknown	hypothetical protein CK203_089731 [Vitis vinifera]
Nn1g01821	Nn1g01821	2.39711	160	1.38908	101	2.22829	178	5.86426	356	10.1706	746	3.51056	260	18.3326	1299	26.4953	1662	16.4473	1089	3.69e-05	1.65968	up	1.73e-40	3.6606	up	6.76e-06	-1.88899	down	--	--	Cellular Component: integral component of membrane (GO:0016021);;	--	--	[E]	Amino acid transport and metabolism	Transmembrane amino acid transporter protein	Probable GABA transporter 2 OS=Arabidopsis thaliana OX=3702 GN=At5g41800 PE=1 SV=1	E	Amino acid transport and metabolism	PREDICTED: probable GABA transporter 2 isoform X1 [Nelumbo nucifera]
Nn1g01853	Nn1g01853	5.89494	213	7.0482	247	4.55716	189	45.2691	1550	83.6852	3424	17.4894	686	193.825	7428	164.014	5708	63.5857	2343	2.02e-10	2.98802	up	3.91e-30	4.93829	up	0.00524866	-1.69977	down	--	--	Molecular Function: DNA binding (GO:0003677);; Molecular Function: transcription factor activity, sequence-specific DNA binding (GO:0003700);; Cellular Component: nucleus (GO:0005634);;	K09286|1.5e-32|brp:103852206|K09286 EREBP-like factor | (RefSeq) ethylene-responsive transcription factor ERF060	--	--	--	AP2 domain	Ethylene-responsive transcription factor ERF061 OS=Arabidopsis thaliana OX=3702 GN=ERF061 PE=2 SV=1	K	Transcription	PREDICTED: ethylene-responsive transcription factor ERF061 [Nelumbo nucifera]
Nn1g01865	Nn1g01865	0.520784	27	0.424202	18	0.943459	47	13.1114	529	17.7485	844	6.00015	274	84.974	3811	105.425	4279	119.05	5165	9.46e-20	4.03883	up	2.8e-165	7.58835	up	1.69e-16	-3.25537	down	--	--	Molecular Function: hydrolase activity, hydrolyzing O-glycosyl compounds (GO:0004553);; Cellular Component: cell wall (GO:0005618);; Biological Process: xyloglucan metabolic process (GO:0010411);; Molecular Function: xyloglucan:xyloglucosyl transferase activity (GO:0016762);; Biological Process: cell wall biogenesis (GO:0042546);; Cellular Component: apoplast (GO:0048046);; Biological Process: ce…	K08235|2.3e-35|nnu:104600357|K08235 xyloglucan:xyloglucosyl transferase [EC:2.4.1.207] | (RefSeq) probable xyloglucan endotransglucosylase/hydrolase protein 30	--	--	--	Xyloglucan endo-transglycosylase (XET) C-terminus	Probable xyloglucan endotransglucosylase/hydrolase protein 29 OS=Arabidopsis thaliana OX=3702 GN=XTH29 PE=2 SV=1	G	Carbohydrate transport and metabolism	PREDICTED: probable xyloglucan endotransglucosylase/hydrolase protein 30 [Nelumbo nucifera]
Nn1g01869	Nn1g01869	10.1328	704	9.52407	665	8.31473	681	20.8341	1390	15.6874	1289	16.4182	1290	44.3625	3327	43.0291	2906	54.6143	3903	7.64e-11	1.0499	up	1.93e-79	2.746	up	2.02e-20	-1.69095	down	--	--	Molecular Function: protein kinase activity (GO:0004672);; Molecular Function: ATP binding (GO:0005524);;	--	--	[R]	General function prediction only	Protein kinase domain	Probable plastid-lipid-associated protein 14, chloroplastic OS=Arabidopsis thaliana OX=3702 GN=PAP14 PE=1 SV=1	G	Carbohydrate transport and metabolism	PREDICTED: probable plastid-lipid-associated protein 14, chloroplastic isoform X1 [Nelumbo nucifera]
Nn1g01911	Nn1g01911	2.27676	107	2.55494	116	2.3091	124	0.701466	32	0.748109	40	1.03378	53	0.021256	2	0.12088	6	0.151839	8	8.81e-06	-1.34886	down	4.78e-16	-3.90031	down	9.2e-05	2.37778	up	--	--	Molecular Function: molecular_function (GO:0003674);; Molecular Function: nucleic acid binding (GO:0003676);; Molecular Function: RNA binding (GO:0003723);; Molecular Function: catalytic activity (GO:0003824);; Molecular Function: nuclease activity (GO:0004518);; Molecular Function: endonuclease activity (GO:0004519);; Molecular Function: binding (GO:0005488);; Cellular Component: cellular_compon…	--	--	--	--	PPR repeat family	--	S	Function unknown	PREDICTED: pentatricopeptide repeat-containing protein At1g13040, mitochondrial [Nelumbo nucifera]
Nn1g01973	Nn1g01973	6.61621	480	7.05475	496	5.37425	446	0.76753	55	0.942322	77	0.530195	44	0.196458	16	0.226368	17	0.148679	12	1.08e-27	-2.86792	down	4.15e-48	-4.49356	down	0.00107113	1.5239	up	--	--	Biological Process: chromosome condensation (GO:0030261);;	K11490|0.0e+00|nnu:104587268|K11490 condensin-2 complex subunit H2 | (RefSeq) condensin-2 complex subunit H2-like	--	[S]	Function unknown	Condensin II complex subunit CAP-H2 or CNDH2, C-term	Condensin-2 complex subunit H2 OS=Arabidopsis thaliana OX=3702 GN=CAPH2 PE=2 SV=1	S	Function unknown	PREDICTED: condensin-2 complex subunit H2-like [Nelumbo nucifera]
Nn1g02012	Nn1g02012	1.09676	300	1.42082	376	1.04985	329	0.26335	69	0.20878	65	0.317033	95	0.08421	25	0.07104	19	0.067907	19	3.42e-14	-2.00602	down	1.72e-30	-3.52049	down	0.000236995	1.44878	up	--	--	Molecular Function: anaphase-promoting complex binding (GO:0010997);; Biological Process: cell division (GO:0051301);; Molecular Function: ubiquitin-protein transferase activator activity (GO:0097027);; Biological Process: positive regulation of ubiquitin protein ligase activity (GO:1904668);;	K03363|5.9e-265|nnu:104596314|K03363 cell division cycle 20, cofactor of APC complex | (RefSeq) cell division cycle 20.1, cofactor of APC complex-like	Ubiquitin mediated proteolysis (ko04120)	[DO]	Cell cycle control, cell division, chromosome partitioning;; Posttranslational modification, protein turnover, chaperones	WD domain, G-beta repeat	Cell division cycle 20.1, cofactor of APC complex OS=Arabidopsis thaliana OX=3702 GN=CDC20-1 PE=1 SV=1	--	--	PREDICTED: cell division cycle 20.1, cofactor of APC complex-like isoform X1 [Nelumbo nucifera]
Nn1g02033	Nn1g02033	0.414414	23	0.555465	30	1.21405	77	6.02025	315	3.55185	222	1.30526	79	36.9669	2160	46.6494	2476	85.584	4807	0.000235444	2.18328	up	3.74e-46	6.52913	up	4.34e-14	-3.97644	down	[Q]	Secondary metabolites biosynthesis, transport and catabolism	Biological Process: lipid metabolic process (GO:0006629);; Molecular Function: fatty-acyl-CoA reductase (alcohol-forming) activity (GO:0080019);;	K13356|4.6e-288|nnu:104596330|K13356 alcohol-forming fatty acyl-CoA reductase [EC:1.2.1.84] | (RefSeq) fatty acyl-CoA reductase 3-like	Cutin, suberine and wax biosynthesis (ko00073);; Peroxisome (ko04146)	[I]	Lipid transport and metabolism	Male sterility protein	Alcohol-forming fatty acyl-CoA reductase OS=Simmondsia chinensis OX=3999 PE=1 SV=1	I	Lipid transport and metabolism	PREDICTED: fatty acyl-CoA reductase 3-like [Nelumbo nucifera]
Nn1g02035	Nn1g02035	62.0689	2628	53.4628	2194	46.0056	2232	185.784	7416	250.584	11957	143.13	6556	402.78	18009	509.752	20696	286.578	12335	2.53e-16	1.93417	up	2.84e-36	3.29502	up	6.09e-05	-1.32956	down	--	--	Molecular Function: iron ion binding (GO:0005506);; Cellular Component: integral component of membrane (GO:0016021);;	K00366|1.7e-06|ota:OT_ostta10g00930|K00366 ferredoxin-nitrite reductase [EC:1.7.7.1] | (RefSeq) Riboflavin synthase-like beta-barrel	Nitrogen metabolism (ko00910)	--	--	PDZ domain	--	S	Function unknown	PREDICTED: uncharacterized protein LOC104596332 [Nelumbo nucifera]
Nn1g02070	Nn1g02070	13.5137	1511	12.3673	1341	9.55467	1234	2.58333	277	3.64114	465	2.93772	361	0.650567	80	0.611708	66	0.569901	69	6.34e-18	-1.79019	down	6.02e-70	-3.78646	down	1.1e-14	1.95272	up	--	--	Molecular Function: DNA binding (GO:0003677);; Cellular Component: nucleus (GO:0005634);; Biological Process: DNA replication (GO:0006260);; Biological Process: DNA repair (GO:0006281);; Biological Process: DNA recombination (GO:0006310);; Molecular Function: zinc ion binding (GO:0008270);;	K07466|0.0e+00|nnu:104596361|K07466 replication factor A1 | (RefSeq) replication protein A 70 kDa DNA-binding subunit A	DNA replication (ko03030);; Nucleotide excision repair (ko03420);; Mismatch repair (ko03430);; Homologous recombination (ko03440)	[L]	Replication, recombination and repair	Replication factor-A C terminal domain	Replication protein A 70 kDa DNA-binding subunit C OS=Arabidopsis thaliana OX=3702 GN=RPA1C PE=3 SV=1	L	Replication, recombination and repair	PREDICTED: replication protein A 70 kDa DNA-binding subunit A [Nelumbo nucifera]
Nn1g02073	Nn1g02073	29.8064	1767	24.6928	1373	39.4312	2158	100.76	5703	89.1681	5977	75.6545	4917	215.82	12585	187.197	11263	318.297	16768	2.28e-25	1.75434	up	2.5e-71	3.38851	up	2.1e-14	-1.62608	down	--	--	Molecular Function: methyltransferase activity (GO:0008168);; Cellular Component: integral component of membrane (GO:0016021);; Biological Process: methylation (GO:0032259);;	K23872|9.6e-72|smo:SELMODRAFT_168608|K23872 putative homogalacturonan methyltransferase [EC:2.1.1.-] | (RefSeq) hypothetical protein	--	--	--	Putative S-adenosyl-L-methionine-dependent methyltransferase	Probable methyltransferase PMT21 OS=Arabidopsis thaliana OX=3702 GN=ERD3 PE=2 SV=1	S	Function unknown	PREDICTED: probable methyltransferase PMT21 [Nelumbo nucifera]
Nn1g02180	Nn1g02180	27.7105	825	21.4247	620	22.1881	758	64.134	1814	41.0136	1386	55.2566	1789	63.0987	1997	78.9321	2269	135.225	4114	4.31e-10	1.2798	up	1.75e-15	2.35359	up	0.00217762	-1.06184	down	--	--	Cellular Component: nucleus (GO:0005634);; Molecular Function: protein heterodimerization activity (GO:0046982);;	K08066|3.5e-141|nnu:104596441|K08066 nuclear transcription factor Y, gamma | (RefSeq) nuclear transcription factor Y subunit C-9-like	--	[K]	Transcription	Histone-like transcription factor (CBF/NF-Y) and archaeal histone	Nuclear transcription factor Y subunit C-3 OS=Arabidopsis thaliana OX=3702 GN=NFYC3 PE=1 SV=1	K	Transcription	PREDICTED: nuclear transcription factor Y subunit C-9-like [Nelumbo nucifera]
Nn1g02185	Nn1g02185	1.38048	115	1.14355	88	0.997932	97	2.56029	174	3.71062	307	1.81057	143	7.85349	629	10.8257	764	7.5014	594	0.00180502	1.1081	up	1.68e-44	3.17261	up	1.72e-09	-2.00322	down	--	--	Cellular Component: integral component of membrane (GO:0016021);;	K23877|7.8e-18|sind:105177162|K23877 xyloglucan O-acetyltransferase | (RefSeq) protein ALTERED XYLOGLUCAN 4-like	--	--	--	GDSL/SGNH-like Acyl-Esterase family found in Pmr5 and Cas1p	Protein trichome birefringence-like 10 OS=Arabidopsis thaliana OX=3702 GN=TBL10 PE=2 SV=1	S	Function unknown	PREDICTED: protein trichome birefringence-like 11 [Nelumbo nucifera]
Nn1g02261	Nn1g02261	0.083126	7	0.027267	3	0.027642	2	10.3148	547	17.0088	1096	1.75968	109	105.698	6346	134.74	7350	112.414	6464	2.91e-11	5.36421	up	2.66e-146	10.9671	up	9.2e-09	-3.55415	down	--	--	Biological Process: carbohydrate transport (GO:0008643);; Cellular Component: integral component of membrane (GO:0016021);; Molecular Function: transmembrane transporter activity (GO:0022857);;	K24193|3.8e-52|nnu:104596500|K24193 MFS transporter, SP family, sugar:H+ symporter | (RefSeq) sugar transport protein 13	--	[R]	General function prediction only	Sugar (and other) transporter	Sugar transport protein 13 OS=Arabidopsis thaliana OX=3702 GN=STP13 PE=1 SV=2	U	Intracellular trafficking, secretion, and vesicular transport	PREDICTED: sugar transport protein 13 [Nelumbo nucifera]
Nn1g02275	Nn1g02275	16.1998	704	10.4409	476	10.1272	537	29.8875	1391	57.1647	2965	25.4746	1405	174.907	8446	165.202	7227	109.824	4942	1.2e-08	1.77764	up	5.56e-47	4.01716	up	3.51e-09	-2.16547	down	[H]	Coenzyme transport and metabolism	--	K07025|2.0e-119|nnu:104596512|K07025 putative hydrolase of the HAD superfamily | (RefSeq) uncharacterized LOC104596512	--	[R]	General function prediction only	Haloacid dehalogenase-like hydrolase	--	S	Function unknown	PREDICTED: uncharacterized protein LOC104596512 [Nelumbo nucifera]
Nn1g02331	Nn1g02331	16.411	367	17.3677	377	12.554	322	4.01039	86	1.78696	46	4.12826	101	0.081049	2	0	0	0.11669	3	7.08e-09	-2.02182	down	1.82e-28	-6.99228	down	3.3e-10	4.48715	up	--	--	Cellular Component: nucleus (GO:0005634);; Biological Process: negative regulation of transcription, DNA-templated (GO:0045892);;	--	--	--	--	Transcriptional repressor, ovate	Transcription repressor OFP11 OS=Arabidopsis thaliana OX=3702 GN=OFP11 PE=2 SV=1	S	Function unknown	PREDICTED: transcription repressor OFP12-like [Nelumbo nucifera]
Nn1g02386	Nn1g02386	13.8111	899	14.2714	899	14.1497	1062	8.13656	507	2.46742	182	6.85075	485	0.403138	30	0.627005	41	0.565694	39	0.00636734	-1.10447	down	1.27e-95	-4.22628	down	1.41e-09	2.92018	up	--	--	Molecular Function: hydrolase activity (GO:0016787);; Biological Process: phosphatidylinositol dephosphorylation (GO:0046856);;	K24221|5.0e-39|var:108336054|K24221 type I inositol polyphosphate 5-phosphatase IP5P1/2 [EC:3.1.3.56] | (RefSeq) type I inositol polyphosphate 5-phosphatase 2-like	Inositol phosphate metabolism (ko00562)	[U]	Intracellular trafficking, secretion, and vesicular transport	--	Type IV inositol polyphosphate 5-phosphatase 7 OS=Arabidopsis thaliana OX=3702 GN=IP5P7 PE=1 SV=1	T	Signal transduction mechanisms	PREDICTED: type IV inositol polyphosphate 5-phosphatase 7-like [Nelumbo nucifera]
Nn1g02394	Nn1g02394	3.46923	193	2.04653	101	4.58868	286	13.6142	728	12.5033	763	12.4246	750	59.383	3293	44.6002	2399	41.6972	2554	2.35e-11	2.03495	up	3.41e-39	4.27573	up	9.05e-33	-2.2226	down	[G]	Carbohydrate transport and metabolism	Molecular Function: UDP-glycosyltransferase activity (GO:0008194);;	K13692|1.8e-121|ath:AT4G15550|K13692 UDP-glucose:(indol-3-yl)acetate beta-D-glucosyltransferase [EC:2.4.1.121] | (RefSeq) IAGLU; indole-3-acetate beta-D-glucosyltransferase	--	[GC]	Carbohydrate transport and metabolism;; Energy production and conversion	UDP-glucoronosyl and UDP-glucosyl transferase	Crocetin glucosyltransferase, chloroplastic OS=Gardenia jasminoides OX=114476 GN=UGT75L6 PE=1 SV=1	--	--	PREDICTED: crocetin glucosyltransferase, chloroplastic-like [Nelumbo nucifera]
Nn1g02448	Nn1g02448	89.099	1835	86.3595	1723	82.8773	1954	292.094	5711	243.977	5693	237.503	5319	567.101	12417	704.627	13994	741.84	15628	2.6e-42	1.70025	up	4.94e-162	3.38003	up	1.74e-23	-1.67602	down	[E]	Amino acid transport and metabolism	Molecular Function: iron ion binding (GO:0005506);; Cellular Component: nucleus (GO:0005634);; Cellular Component: cytoplasm (GO:0005737);; Molecular Function: acireductone dioxygenase [iron(II)-requiring] activity (GO:0010309);; Biological Process: L-methionine salvage from methylthioadenosine (GO:0019509);;	K08967|1.2e-111|nnu:104596617|K08967 1,2-dihydroxy-3-keto-5-methylthiopentene dioxygenase [EC:1.13.11.53 1.13.11.54] | (RefSeq) 1,2-dihydroxy-3-keto-5-methylthiopentene dioxygenase 1	Cysteine and methionine metabolism (ko00270)	[S]	Function unknown	ARD/ARD' family	1,2-dihydroxy-3-keto-5-methylthiopentene dioxygenase 1 OS=Vitis vinifera OX=29760 GN=VIT_05s0020g04070 PE=3 SV=1	Z	Cytoskeleton	PREDICTED: 1,2-dihydroxy-3-keto-5-methylthiopentene dioxygenase 1 [Nelumbo nucifera]
Nn1g02486	Nn1g02486	0.353014	35	0.388721	37	0.500717	56	1.07509	99	0.747036	82	0.813803	86	1.92758	198	1.77875	166	1.91527	189	0.000913263	1.14654	up	1.15e-24	2.5589	up	3.98e-08	-1.38426	down	--	--	Molecular Function: DNA binding (GO:0003677);;	--	--	--	--	--	--	S	Function unknown	PREDICTED: homeobox protein orthopedia-like [Nelumbo nucifera]
Nn1g02514	Nn1g02514	122.697	1843	114.233	1663	103.217	1777	45.8846	655	44.0054	751	51.4028	840	14.9221	239	15.3386	223	20.3293	313	5.33e-20	-1.13551	down	9.85e-45	-2.3162	down	1.58e-09	1.16259	up	--	--	Cellular Component: nucleosome (GO:0000786);; Molecular Function: DNA binding (GO:0003677);; Cellular Component: nucleus (GO:0005634);; Molecular Function: protein heterodimerization activity (GO:0046982);;	K11251|4.9e-67|nnu:104609585|K11251 histone H2A | (RefSeq) probable histone H2A variant 3	--	[B]	Chromatin structure and dynamics	Core histone H2A/H2B/H3/H4	Probable histone H2A variant 1 OS=Oryza sativa subsp. japonica OX=39947 GN=Os03g0162200 PE=2 SV=1	B	Chromatin structure and dynamics	PREDICTED: probable histone H2A variant 3 [Nelumbo nucifera]
Nn1g02517	Nn1g02517	52.1859	3494	30.5881	1981	52.2196	4079	15.0121	949	15.3924	1211	17.8065	1297	2.3279	167	1.91225	127	1.75829	132	6.53e-09	-1.33047	down	1.35e-49	-3.98156	down	4.58e-43	2.62705	up	--	--	--	--	--	--	--	PDDEXK-like family of unknown function	--	S	Function unknown	PREDICTED: uncharacterized protein LOC104613266 [Nelumbo nucifera]
Nn1g02523	Nn1g02523	3.53374	187	2.87605	148	2.65171	161	24.5053	1230	27.8063	1668	18.6116	1070	82.9828	4662	117.432	5992	18.2389	985	2.38e-45	3.05475	up	1.43e-17	4.87699	up	0.00227076	-1.80007	down	[Q]	Secondary metabolites biosynthesis, transport and catabolism	Biological Process: fatty acid biosynthetic process (GO:0006633);; Cellular Component: integral component of membrane (GO:0016021);; Molecular Function: transferase activity, transferring acyl groups other than amino-acyl groups (GO:0016747);;	K15397|1.2e-274|nnu:104613269|K15397 3-ketoacyl-CoA synthase [EC:2.3.1.199] | (RefSeq) 3-ketoacyl-CoA synthase 20-like	Fatty acid elongation (ko00062);; Plant-pathogen interaction (ko04626)	--	--	FAE1/Type III polyketide synthase-like protein	3-ketoacyl-CoA synthase 20 OS=Arabidopsis thaliana OX=3702 GN=KCS20 PE=2 SV=1	I	Lipid transport and metabolism	PREDICTED: 3-ketoacyl-CoA synthase 20-like [Nelumbo nucifera]
Nn1g02554	Nn1g02554	6.09816	429	6.0632	413	6.19093	499	2.12985	144	2.90917	227	3.2937	253	0.671298	52	0.989576	69	0.572602	43	1.78e-06	-1.00422	down	1.73e-24	-2.5516	down	1.18e-05	1.50075	up	[P]	Inorganic ion transport and metabolism	Cellular Component: cellular_component (GO:0005575);; Cellular Component: intracellular (GO:0005622);; Cellular Component: cell (GO:0005623);; Cellular Component: cytoplasm (GO:0005737);; Cellular Component: chloroplast (GO:0009507);; Cellular Component: plastid envelope (GO:0009526);; Cellular Component: plastid (GO:0009536);; Cellular Component: chloroplast envelope (GO:0009941);; Cellular Comp…	--	--	--	--	Castor and Pollux, part of voltage-gated ion channel	Putative ion channel POLLUX-like 2 OS=Arabidopsis thaliana OX=3702 GN=At5g43745 PE=2 SV=1	P	Inorganic ion transport and metabolism	PREDICTED: putative ion channel POLLUX-like 2, partial [Nelumbo nucifera]
Nn1g02562	Nn1g02562	8.13116	376	8.22391	395	15.3211	863	71.8184	3285	65.3083	3530	45.588	2383	120.007	6110	163.375	7527	133.835	6649	1.7e-16	2.56281	up	2.89e-39	4.08844	up	1.8e-09	-1.48098	down	--	--	Cellular Component: nucleus (GO:0005634);; Biological Process: regulation of transcription, DNA-templated (GO:0006355);; Biological Process: auxin-activated signaling pathway (GO:0009734);;	K14484|7.9e-110|nnu:104612448|K14484 auxin-responsive protein IAA | (RefSeq) auxin-responsive protein IAA4-like	Plant hormone signal transduction (ko04075)	--	--	AUX/IAA family	Auxin-induced protein 22D OS=Vigna radiata var. radiata OX=3916 GN=AUX22D PE=2 SV=1	K	Transcription	PREDICTED: auxin-responsive protein IAA4-like [Nelumbo nucifera]
Nn1g02569	Nn1g02569	221.747	4390	115.306	2214	204.191	4635	17.589	331	27.0665	609	18.6548	402	1.94856	42	2.44129	47	0.985664	20	7e-25	-2.89066	down	2.34e-56	-6.10909	down	3.88e-15	3.11468	up	--	--	Biological Process: defense response to bacterium (GO:0042742);; Biological Process: defense response to fungus (GO:0050832);;	--	--	[R]	General function prediction only	Barwin family	Wound-induced protein WIN1 OS=Solanum tuberosum OX=4113 GN=WIN1 PE=2 SV=1	S	Function unknown	PREDICTED: pathogenesis-related protein PR-4-like [Nelumbo nucifera]
Nn1g02577	Nn1g02577	20.5068	595	24.0847	672	19.5586	657	91.4325	2704	105.87	3708	102.375	3423	3.81765	114	6.05512	183	2.31903	80	4.08e-66	2.42528	up	2.69e-07	-1.86317	down	4.86e-36	4.20527	up	--	--	Cellular Component: chloroplast (GO:0009507);; Cellular Component: photosystem II (GO:0009523);; Biological Process: photosynthesis (GO:0015979);; Cellular Component: integral component of membrane (GO:0016021);;	K02721|7.1e-88|nnu:104612436|K02721 photosystem II PsbW protein | (RefSeq) photosystem II reaction center W protein, chloroplastic-like	Photosynthesis (ko00195)	--	--	Photosystem II reaction centre W protein (PsbW)	Photosystem II reaction center W protein, chloroplastic OS=Spinacia oleracea OX=3562 GN=psbW PE=1 SV=1	S	Function unknown	PREDICTED: photosystem II reaction center W protein, chloroplastic-like isoform X1 [Nelumbo nucifera]
Nn1g02590	Nn1g02590	1.51985	52	0.335739	12	6.72236	235	25.583	951	32.1591	1616	20.1427	873	78.7848	3273	86.7948	3445	81.886	3129	0.000815109	2.81961	up	5.26e-08	5.10624	up	2.92e-12	-1.8664	down	--	--	Molecular Function: methyltransferase activity (GO:0008168);; Biological Process: methylation (GO:0032259);;	K21483|5.3e-43|nnu:104612427|K21483 salicylate 1-O-methyltransferase [EC:2.1.1.274] | (RefSeq) salicylate carboxymethyltransferase-like	--	--	--	SAM dependent carboxyl methyltransferase	Salicylate carboxymethyltransferase OS=Clarkia breweri OX=36903 GN=SAMT PE=1 SV=1	S	Function unknown	PREDICTED: salicylate carboxymethyltransferase-like [Nelumbo nucifera]
Nn1g02597	Nn1g02597	10.1989	201	10.6341	203	14.1888	321	4.47107	84	3.21056	73	2.66424	58	0	0	0.105965	3	0	0	1.51e-07	-1.58414	down	2.71e-20	-6.97131	down	5.27e-11	4.86607	up	--	--	Molecular Function: DNA binding (GO:0003677);; Molecular Function: transcription factor activity, sequence-specific DNA binding (GO:0003700);; Cellular Component: nucleus (GO:0005634);;	K09286|1.6e-73|nnu:104612420|K09286 EREBP-like factor | (RefSeq) ethylene-responsive transcription factor 9-like	--	--	--	--	Ethylene-responsive transcription factor 9 OS=Arabidopsis thaliana OX=3702 GN=ERF9 PE=1 SV=1	K	Transcription	PREDICTED: ethylene-responsive transcription factor 9-like [Nelumbo nucifera]
Nn1g02619	Nn1g02619	41.3948	2188	38.9933	1989	39.5447	2389	73.8248	3702	102.907	6182	76.5448	4401	159.037	8938	140.746	7171	139.031	7573	3.21e-12	1.20084	up	1.73e-74	2.30414	up	3.4e-07	-1.09641	down	[E]	Amino acid transport and metabolism	Molecular Function: hydrolase activity, acting on carbon-nitrogen (but not peptide) bonds, in linear amidines (GO:0016813);;	K18151|1.6e-59|nnu:104612407|K18151 ureidoglycolate amidohydrolase [EC:3.5.1.116] | (RefSeq) ureidoglycolate hydrolase	Purine metabolism (ko00230)	--	--	--	Ureidoglycolate hydrolase OS=Arabidopsis thaliana OX=3702 GN=UAH PE=1 SV=1	E	Amino acid transport and metabolism	PREDICTED: ureidoglycolate hydrolase [Nelumbo nucifera]
Nn1g02641	Nn1g02641	1.00213	33	3.13491	98	4.98949	186	14.3088	442	8.48638	314	7.30013	257	39.0858	1373	41.8832	1330	57.1294	1997	0.0017278	1.68946	up	4.26e-17	4.26336	up	2.36e-14	-2.48498	down	[I]	Lipid transport and metabolism	Molecular Function: methyltransferase activity (GO:0008168);; Biological Process: methylation (GO:0032259);;	K21483|1.3e-193|nnu:104612454|K21483 salicylate 1-O-methyltransferase [EC:2.1.1.274] | (RefSeq) salicylate carboxymethyltransferase-like	--	--	--	SAM dependent carboxyl methyltransferase	Salicylate carboxymethyltransferase OS=Clarkia breweri OX=36903 GN=SAMT PE=1 SV=1	S	Function unknown	PREDICTED: salicylate carboxymethyltransferase-like [Nelumbo nucifera]
Nn1g02697	Nn1g02697	1.99776	177	1.89896	163	1.55065	158	0.75496	64	0.900347	91	0.422244	41	0.089844	9	0.133676	12	0.120006	11	0.000821229	-1.20874	down	8.86e-22	-3.46741	down	4.41e-05	2.11584	up	--	--	Molecular Function: zinc ion binding (GO:0008270);;	K22262|1.2e-157|qsu:112034235|K22262 WD repeat and FYVE domain-containing protein 3 | (RefSeq) protein SPIRRIG	--	[R]	General function prediction only	PPR repeat family	Pentatricopeptide repeat-containing protein At3g22690 OS=Arabidopsis thaliana OX=3702 GN=PCMP-H56 PE=3 SV=1	S	Function unknown	PREDICTED: pentatricopeptide repeat-containing protein At4g21065-like [Nelumbo nucifera]
Nn1g02698	Nn1g02698	16.8578	2065	16.5118	1957	14.9691	2099	6.8262	784	7.06371	978	7.57264	1004	2.13926	265	1.518	169	2.84024	327	1.62e-21	-1.05049	down	1.45e-26	-2.55326	down	2.54e-08	1.47912	up	[K]	Transcription	Molecular Function: DNA binding (GO:0003677);; Molecular Function: NAD+ ADP-ribosyltransferase activity (GO:0003950);; Cellular Component: nucleus (GO:0005634);; Biological Process: protein ADP-ribosylation (GO:0006471);; Molecular Function: zinc ion binding (GO:0008270);; Molecular Function: NAD binding (GO:0051287);;	K24070|0.0e+00|nnu:104610063|K24070 poly [ADP-ribose] polymerase 1 [EC:2.4.2.30] | (RefSeq) poly [ADP-ribose] polymerase 1	Base excision repair (ko03410)	[KLO]	Transcription;; Replication, recombination and repair;; Posttranslational modification, protein turnover, chaperones	Poly(ADP-ribose) polymerase catalytic domain	Poly [ADP-ribose] polymerase 1 OS=Arabidopsis thaliana OX=3702 GN=PARP1 PE=1 SV=2	--	--	PREDICTED: poly [ADP-ribose] polymerase 1 [Nelumbo nucifera]
Nn1g02712	Nn1g02712	15.7431	454	15.6689	442	18.5565	615	4.90201	130	7.00807	237	5.62356	180	2.24787	74	1.34938	40	2.24349	69	2.17e-09	-1.35275	down	1.19e-22	-2.57178	down	0.00100681	1.17368	up	--	--	--	--	--	--	--	Drought induced 19 protein (Di19), zinc-binding	Protein DEHYDRATION-INDUCED 19 homolog 4 OS=Oryza sativa subsp. japonica OX=39947 GN=DI19-4 PE=2 SV=1	S	Function unknown	PREDICTED: protein DEHYDRATION-INDUCED 19-like [Nelumbo nucifera]
Nn1g02716	Nn1g02716	1.65584	50	0.82677	24	0.990036	34	2.05857	59	2.59394	89	2.11134	69	4.92709	157	5.58211	162	2.3289	72	0.00941042	1.05688	up	1.93e-06	2.28172	up	0.00661324	-1.18816	down	--	--	Cellular Component: cellular_component (GO:0005575);; Cellular Component: intracellular (GO:0005622);; Cellular Component: cell (GO:0005623);; Cellular Component: cytoplasm (GO:0005737);; Cellular Component: intracellular part (GO:0044424);; Cellular Component: cell part (GO:0044464);;	K19042|5.6e-139|nnu:104610044|K19042 E3 ubiquitin-protein ligase BOI and related proteins [EC:2.3.2.27] | (RefSeq) uncharacterized LOC104610044	--	[O]	Posttranslational modification, protein turnover, chaperones	Protein of unknown function (DUF1645)	--	S	Function unknown	PREDICTED: uncharacterized protein LOC104610044 [Nelumbo nucifera]
Nn1g02787	Nn1g02787	2.8646	575	2.32093	452	1.93538	445	0.263769	51	0.252244	58	0.350689	77	0.114897	25	0.077492	16	0.063482	14	1.8e-31	-2.84636	down	1.03e-39	-4.25082	down	0.00266184	1.3306	up	--	--	Molecular Function: GTP binding (GO:0005525);; Molecular Function: hydrolase activity, acting on acid anhydrides (GO:0016817);;	--	--	--	--	--	--	S	Function unknown	PREDICTED: translocase of chloroplast 159, chloroplastic-like [Nelumbo nucifera]
Nn1g02795	Nn1g02795	29.9471	1143	26.9844	998	33.3875	1461	13.2016	479	7.6005	330	13.4505	559	1.75937	67	1.89783	66	3.0192	106	4.88e-07	-1.25346	down	1.73e-52	-3.43755	down	6.59e-10	2.11577	up	[GM]	Carbohydrate transport and metabolism;; Cell wall/membrane/envelope biogenesis	Biological Process: carbohydrate metabolic process (GO:0005975);; Molecular Function: isomerase activity (GO:0016853);; Molecular Function: carbohydrate derivative binding (GO:0097367);; Biological Process: carbohydrate derivative metabolic process (GO:1901135);;	K06041|1.5e-192|nnu:104589997|K06041 arabinose-5-phosphate isomerase [EC:5.3.1.13] | (RefSeq) probable arabinose 5-phosphate isomerase	--	--	--	SIS domain	Probable arabinose 5-phosphate isomerase OS=Arabidopsis thaliana OX=3702 GN=SETH3 PE=2 SV=1	M	Cell wall/membrane/envelope biogenesis	PREDICTED: probable arabinose 5-phosphate isomerase [Nelumbo nucifera]
Nn1g02829	Nn1g02829	2.04251	185	1.94153	170	1.69397	175	0.580742	50	0.655795	68	0.954439	94	0.057344	6	0.121074	11	0.229189	22	2.22e-05	-1.21137	down	6.66e-14	-3.26376	down	0.000526882	1.93417	up	--	--	Molecular Function: zinc ion binding (GO:0008270);;	K22262|3.1e-148|qsu:112034235|K22262 WD repeat and FYVE domain-containing protein 3 | (RefSeq) protein SPIRRIG	--	[R]	General function prediction only	DYW family of nucleic acid deaminases	Putative pentatricopeptide repeat-containing protein At3g23330 OS=Arabidopsis thaliana OX=3702 GN=PCMP-H32 PE=3 SV=1	L	Replication, recombination and repair	PREDICTED: putative pentatricopeptide repeat-containing protein At3g23330 [Nelumbo nucifera]
Nn1g02842	Nn1g02842	19.6438	529	23.7683	621	17.4367	539	3.40629	88	3.83828	118	4.53765	133	1.16863	34	1.11854	30	0.452132	13	1.51e-23	-2.20675	down	1.57e-26	-3.95103	down	0.000191668	1.67915	up	--	--	Molecular Function: Rho GDP-dissociation inhibitor activity (GO:0005094);; Cellular Component: cytoplasm (GO:0005737);; Cellular Component: integral component of membrane (GO:0016021);;	K12462|2.1e-97|nnu:104602845|K12462 Rho GDP-dissociation inhibitor | (RefSeq) rho GDP-dissociation inhibitor 1-like	--	[T]	Signal transduction mechanisms	RHO protein GDP dissociation inhibitor	Rho GDP-dissociation inhibitor 1 OS=Arabidopsis thaliana OX=3702 GN=GDI1 PE=1 SV=1	T	Signal transduction mechanisms	PREDICTED: rho GDP-dissociation inhibitor 1-like [Nelumbo nucifera]
Nn1g02845	Nn1g02845	0.294931	28	0.431817	38	0.245373	26	3.47415	277	1.4992	154	2.0122	182	4.31951	415	5.23843	449	45.3499	4098	2.84e-11	2.713	up	9.76e-09	5.55786	up	0.000133946	-2.87011	down	--	--	--	--	--	--	--	--	--	S	Function unknown	PREDICTED: glycine-rich cell wall structural protein-like isoform X1 [Nelumbo nucifera]
Nn1g02867	Nn1g02867	9.76776	1114	10.4902	1160	8.87813	1161	1.62315	176	1.48754	193	2.01222	250	0.395194	48	0.421347	47	0.637394	75	6.17e-43	-2.36206	down	9.5e-68	-3.87472	down	1.26e-06	1.47246	up	--	--	Cellular Component: cellular_component (GO:0005575);; Cellular Component: cell wall (GO:0005618);; Cellular Component: cell (GO:0005623);; Cellular Component: external encapsulating structure (GO:0030312);; Cellular Component: cell part (GO:0044464);; Cellular Component: cell periphery (GO:0071944);;	--	--	--	--	--	KIN14B-interacting protein At4g14310 OS=Arabidopsis thaliana OX=3702 GN=At4g14310 PE=1 SV=1	S	Function unknown	PREDICTED: uncharacterized protein LOC104602833 [Nelumbo nucifera]
Nn1g02900	Nn1g02900	28.5411	1423	38.5758	1864	29.5153	1687	2.35867	112	1.57649	90	2.53826	138	0	0	0	0	0	0	6.39e-56	-3.71596	down	4.46e-26	-11.1479	down	4.88e-15	6.62777	up	--	--	Cellular Component: host cell nucleus (GO:0042025);;	K21777|8.5e-249|nnu:104593604|K21777 G2/mitotic-specific cyclin-B, other | (RefSeq) G2/mitotic-specific cyclin S13-7	--	[D]	Cell cycle control, cell division, chromosome partitioning	Cyclin, N-terminal domain	G2/mitotic-specific cyclin S13-6 OS=Glycine max OX=3847 PE=2 SV=1	D	Cell cycle control, cell division, chromosome partitioning	PREDICTED: G2/mitotic-specific cyclin S13-7 isoform X1 [Nelumbo nucifera]
Nn1g02913	Nn1g02913	21.6304	1134	28.4786	1447	20.2182	1215	1.46067	73	1.54424	92	1.54339	88	0.106875	6	0.072481	4	0.031248	2	2.48e-69	-3.77418	down	4.97e-62	-7.69487	down	2.19e-13	3.77176	up	--	--	Biological Process: male meiosis II (GO:0007142);;	--	--	--	--	--	Protein JASON OS=Arabidopsis thaliana OX=3702 GN=JASON PE=2 SV=1	--	--	PREDICTED: rRNA biogenesis protein rrp36 [Nelumbo nucifera]
Nn1g02928	Nn1g02928	36.9046	1003	24.4932	634	36.2721	1102	101.68	2604	95.9561	2968	88.2374	2589	207.592	5968	160.786	4233	123.495	3542	6.11e-20	1.67763	up	3.99e-24	2.78238	up	2.06e-05	-1.10215	down	--	--	Biological Process: response to high light intensity (GO:0009644);; Biological Process: photosynthetic electron transport in photosystem I (GO:0009773);;	--	--	--	--	--	Protein PROTON GRADIENT REGULATION 5, chloroplastic OS=Arabidopsis thaliana OX=3702 GN=PGR5 PE=1 SV=1	S	Function unknown	PREDICTED: protein PROTON GRADIENT REGULATION 5, chloroplastic-like [Nelumbo nucifera]
Nn1g02947	Nn1g02947	18.0942	1624	19.2385	1679	15.4772	1603	4.77379	406	5.40367	560	5.45918	540	0.495253	48	0.597727	44	0.466121	40	2.16e-26	-1.60973	down	1.04e-114	-4.748	down	6.69e-44	3.10206	up	[R]	General function prediction only	Cellular Component: nucleus (GO:0005634);; Cellular Component: chromosome (GO:0005694);; Molecular Function: zinc ion binding (GO:0008270);; Molecular Function: histone-lysine N-methyltransferase activity (GO:0018024);;	K11420|3.2e-34|mdm:108174661|K11420 [histone H3]-lysine9 N-trimethyltransferase EHMT [EC:2.1.1.355] | (RefSeq) histone-lysine N-methyltransferase, H3 lysine-9 specific SUVH6-like	Lysine degradation (ko00310)	[BK]	Chromatin structure and dynamics;; Transcription	Ubiquitin-binding WIYLD domain	Probable inactive histone-lysine N-methyltransferase SUVR2 OS=Arabidopsis thaliana OX=3702 GN=SUVR2 PE=1 SV=2	B	Chromatin structure and dynamics	PREDICTED: probable inactive histone-lysine N-methyltransferase SUVR2 [Nelumbo nucifera]
Nn1g02970	Nn1g02970	4.60159	169	4.79054	170	3.9156	173	18.4125	939	28.893	1594	17.023	973	55.8314	3455	51.4569	2912	21.8148	1293	1.97e-34	2.8163	up	3.54e-29	4.3063	up	0.000599933	-1.45949	down	[QV]	Secondary metabolites biosynthesis, transport and catabolism;; Defense mechanisms	Molecular Function: monooxygenase activity (GO:0004497);; Molecular Function: iron ion binding (GO:0005506);; Cellular Component: integral component of membrane (GO:0016021);; Molecular Function: oxidoreductase activity, acting on paired donors, with incorporation or reduction of molecular oxygen (GO:0016705);; Molecular Function: heme binding (GO:0020037);;	K20617|2.8e-157|nnu:104613514|K20617 cytochrome P450 family 71 subfamily A | (RefSeq) cytochrome P450 71A1-like	--	[Q]	Secondary metabolites biosynthesis, transport and catabolism	Cytochrome P450	Cytochrome P450 71A1 OS=Persea americana OX=3435 GN=CYP71A1 PE=1 SV=2	Q	Secondary metabolites biosynthesis, transport and catabolism	PREDICTED: cytochrome P450 71A1-like [Nelumbo nucifera]
Nn1g03054	Nn1g03054	25.3706	1479	27.3367	1553	16.047	1106	8.26212	451	7.84227	534	11.2418	724	0	0	0	0	0.024293	3	4.5e-06	-1.1841	down	7.92e-39	-9.39934	down	1.55e-36	7.73152	up	--	--	--	--	--	--	--	Neprosin activation peptide	--	S	Function unknown	PREDICTED: uncharacterized protein LOC104587627 isoform X1 [Nelumbo nucifera]
Nn1g03056	Nn1g03056	4.23371	484	4.14307	456	4.08781	532	0.798425	87	0.36251	49	0.684505	85	0	0	0	0	0	0	5.05e-20	-2.56024	down	6.27e-18	-9.62226	down	1.28e-11	6.0158	up	--	--	Cellular Component: integral component of membrane (GO:0016021);;	--	--	--	--	Plant phosphoribosyltransferase C-terminal	FT-interacting protein 3 OS=Arabidopsis thaliana OX=3702 GN=FTIP3 PE=1 SV=1	S	Function unknown	PREDICTED: FT-interacting protein 1 [Nelumbo nucifera]
Nn1g03093	Nn1g03093	37.1455	1255	35.8457	1177	30.8064	1186	16.4114	536	14.3335	549	14.8658	555	2.51548	92	4.15792	137	5.04901	176	3.28e-13	-1.03783	down	3.55e-25	-2.6961	down	1.02e-08	1.6312	up	--	--	Biological Process: regulation of transcription, DNA-templated (GO:0006355);; Molecular Function: zinc ion binding (GO:0008270);; Molecular Function: sequence-specific DNA binding (GO:0043565);;	K21630|2.4e-27|cmax:111478040|K21630 GATA-type zinc finger protein 1 | (RefSeq) GATA transcription factor 6-like	--	[K]	Transcription	GATA zinc finger	GATA transcription factor 1 OS=Arabidopsis thaliana OX=3702 GN=GATA1 PE=2 SV=2	K	Transcription	PREDICTED: GATA transcription factor 1-like [Nelumbo nucifera]
Nn1g03134	Nn1g03134	98.3228	4931	98.4728	4483	83.6785	4519	844.956	37904	480.365	26097	490.933	26278	880.435	44749	1353.92	62553	1739.26	80738	4.7e-32	2.77046	up	4.19e-68	4.17704	up	4.32e-05	-1.36166	down	[G]	Carbohydrate transport and metabolism	Molecular Function: pectate lyase activity (GO:0030570);; Biological Process: pectin catabolic process (GO:0045490);; Molecular Function: metal ion binding (GO:0046872);;	K01728|1.3e-120|nnu:104587909|K01728 pectate lyase [EC:4.2.2.2] | (RefSeq) probable pectate lyase 8	Pentose and glucuronate interconversions (ko00040)	--	--	Pectate lyase	Probable pectate lyase 15 OS=Arabidopsis thaliana OX=3702 GN=At4g13710 PE=2 SV=1	G	Carbohydrate transport and metabolism	PREDICTED: probable pectate lyase 8 [Nelumbo nucifera]
Nn1g03205	Nn1g03205	16.9358	920	15.5732	825	15.4384	939	3.09891	153	3.89237	249	3.61348	221	0.551937	33	0.648425	31	0.932815	50	5.3e-33	-2.00329	down	1.84e-81	-4.08891	down	7.17e-11	2.03263	up	--	--	Biological Process: DNA catabolic process, endonucleolytic (GO:0000737);; Molecular Function: DNA binding (GO:0003677);; Molecular Function: ATP binding (GO:0005524);; Cellular Component: chromosome (GO:0005694);; Molecular Function: endodeoxyribonuclease activity, producing 3'-phosphomonoesters (GO:0016889);;	K10878|1.0e-93|nnu:104606617|K10878 meiotic recombination protein SPO11 | (RefSeq) meiotic recombination protein SPO11-1	--	[L]	Replication, recombination and repair	Type IIB DNA topoisomerase	Meiotic recombination protein SPO11-1 OS=Arabidopsis thaliana OX=3702 GN=SPO11-1 PE=1 SV=1	L	Replication, recombination and repair	PREDICTED: meiotic recombination protein SPO11-1 [Nelumbo nucifera]
Nn1g03226	Nn1g03226	11.8589	652	13.3215	490	13.2346	694	30.4766	1118	34.3713	1543	24.5573	1077	55.4634	2266	48.4211	1854	93.4926	5196	1.25e-09	1.12031	up	5.72e-13	2.74837	up	8.32e-05	-1.6091	down	--	--	Cellular Component: plasma membrane (GO:0005886);; Cellular Component: integral component of membrane (GO:0016021);;	--	--	--	--	Domain of unknown function (DUF588)	CASP-like protein 2B1 OS=Vitis vinifera OX=29760 GN=GSVIVT00013502001 PE=2 SV=1	S	Function unknown	PREDICTED: CASP-like protein 2B1 [Nelumbo nucifera]
Nn1g03266	Nn1g03266	17.5732	660	16.5609	594	18.0547	806	39.2525	1426	27.8539	1259	33.5614	1422	45.6356	1905	58.9641	2238	91.0799	3791	3.4e-12	1.10394	up	4.19e-18	2.38111	up	3.96e-05	-1.27012	down	--	--	Molecular Function: N-acetyltransferase activity (GO:0008080);;	--	--	[G]	Carbohydrate transport and metabolism	Acetyltransferase (GNAT) domain	--	G	Carbohydrate transport and metabolism	PREDICTED: N-acetyltransferase 9-like protein isoform X2 [Nelumbo nucifera]
Nn1g03275	Nn1g03275	24.345	911	23.2229	793	29.1044	1164	129.597	4293	57.4046	2339	112.884	4255	149.726	5734	181.051	6138	222.672	8469	1.28e-12	2.01092	up	2.24e-67	3.27584	up	0.000493655	-1.20804	down	[G]	Carbohydrate transport and metabolism	Biological Process: inositol biosynthetic process (GO:0006021);; Molecular Function: inositol monophosphate 1-phosphatase activity (GO:0008934);; Biological Process: phosphatidylinositol phosphorylation (GO:0046854);; Biological Process: inositol phosphate dephosphorylation (GO:0046855);; Molecular Function: metal ion binding (GO:0046872);; Molecular Function: inositol monophosphate 3-phosphatase…	K10047|5.0e-23|nnu:104606566|K10047 inositol-phosphate phosphatase / L-galactose 1-phosphate phosphatase [EC:3.1.3.25 3.1.3.93] | (RefSeq) inositol-phosphate phosphatase-like	Ascorbate and aldarate metabolism (ko00053);; Inositol phosphate metabolism (ko00562);; Phosphatidylinositol signaling system (ko04070)	[G]	Carbohydrate transport and metabolism	Inositol monophosphatase family	Inositol monophosphatase 1 OS=Solanum lycopersicum OX=4081 GN=IMP1 PE=1 SV=1	G	Carbohydrate transport and metabolism	PREDICTED: inositol-phosphate phosphatase-like [Nelumbo nucifera]
Nn1g03284	Nn1g03284	0.284537	24	0.148586	13	0.225126	22	1.87435	144	3.0736	249	2.49132	202	21.8464	1814	12.2225	890	2.05295	168	2.1e-23	3.31658	up	1.96e-16	5.79373	up	0.000347908	-2.39645	down	[G]	Carbohydrate transport and metabolism	Cellular Component: integral component of membrane (GO:0016021);; Molecular Function: transmembrane transporter activity (GO:0022857);;	K14445|1.4e-298|nnu:104606561|K14445 solute carrier family 13 (sodium-dependent dicarboxylate transporter), member 2/3/5 | (RefSeq) tonoplast dicarboxylate transporter-like	--	[P]	Inorganic ion transport and metabolism	Sodium:sulfate symporter transmembrane region	Tonoplast dicarboxylate transporter OS=Arabidopsis thaliana OX=3702 GN=TDT PE=2 SV=2	P	Inorganic ion transport and metabolism	PREDICTED: tonoplast dicarboxylate transporter-like [Nelumbo nucifera]
Nn1g03329	Nn1g03329	49.2634	2290	39.3228	1764	44.0205	2347	12.8889	553	23.4939	1237	11.1977	564	1.56497	78	1.5622	71	1.81927	88	1.53e-05	-1.32272	down	2.34e-145	-4.285	down	2.1e-15	2.84411	up	[Q]	Secondary metabolites biosynthesis, transport and catabolism	Molecular Function: fumarylacetoacetase activity (GO:0004334);; Biological Process: L-phenylalanine catabolic process (GO:0006559);; Biological Process: tyrosine catabolic process (GO:0006572);; Molecular Function: metal ion binding (GO:0046872);;	K01555|1.5e-255|nnu:104606537|K01555 fumarylacetoacetase [EC:3.7.1.2] | (RefSeq) fumarylacetoacetase	Tyrosine metabolism (ko00350)	[G]	Carbohydrate transport and metabolism	Fumarylacetoacetate (FAA) hydrolase family	Fumarylacetoacetase OS=Arabidopsis thaliana OX=3702 GN=FAH PE=1 SV=1	G	Carbohydrate transport and metabolism	PREDICTED: fumarylacetoacetase [Nelumbo nucifera]
Nn1g03336	Nn1g03336	99.2001	6638	117.97	7054	100.823	7940	41.0964	2599	46.0715	3596	53.6493	3648	13.8665	1029	10.133	650	15.1435	1045	5.05e-16	-1.04197	down	1.67e-35	-2.53323	down	2.15e-10	1.46889	up	--	--	Biological Process: microtubule cytoskeleton organization (GO:0000226);; Molecular Function: microtubule binding (GO:0008017);;	K16732|0.0e+00|nnu:104606529|K16732 protein regulator of cytokinesis 1 | (RefSeq) 65-kDa microtubule-associated protein 1-like	--	[DZ]	Cell cycle control, cell division, chromosome partitioning;; Cytoskeleton	Microtubule associated protein (MAP65/ASE1 family)	65-kDa microtubule-associated protein 1 OS=Arabidopsis thaliana OX=3702 GN=MAP65-1 PE=1 SV=1	--	--	PREDICTED: 65-kDa microtubule-associated protein 1-like [Nelumbo nucifera]
Nn1g03351	Nn1g03351	20.2908	432	18.6094	384	23.5686	575	8.06971	163	8.16865	198	8.00958	186	3.34146	76	2.46726	51	2.75598	60	1.52e-12	-1.22722	down	2.44e-25	-2.41773	down	6.76e-06	1.16629	up	--	--	--	--	--	--	--	--	--	--	--	PREDICTED: uncharacterized protein LOC104606519 [Nelumbo nucifera]
Nn1g03357	Nn1g03357	7.40605	321	7.88674	332	8.84695	444	15.6568	651	15.7416	788	14.7074	709	41.6579	1933	47.5633	2016	26.6916	1203	7.81e-13	1.06799	up	9.65e-23	2.68634	up	4.34e-09	-1.61163	down	[H]	Coenzyme transport and metabolism	Molecular Function: alternative oxidase activity (GO:0009916);; Cellular Component: integral component of membrane (GO:0016021);; Molecular Function: metal ion binding (GO:0046872);; Cellular Component: respiratory chain (GO:0070469);; Molecular Function: ubiquinol:oxygen oxidoreductase activity (GO:0102721);;	K17893|6.5e-180|nnu:104606512|K17893 ubiquinol oxidase [EC:1.10.3.11] | (RefSeq) ubiquinol oxidase 4, chloroplastic/chromoplastic	--	--	--	Alternative oxidase	Ubiquinol oxidase 4, chloroplastic/chromoplastic OS=Arabidopsis thaliana OX=3702 GN=AOX4 PE=1 SV=2	C	Energy production and conversion	PREDICTED: ubiquinol oxidase 4, chloroplastic/chromoplastic [Nelumbo nucifera]
Nn1g03375	Nn1g03375	19.7324	501	12.7087	313	28.6495	833	5.17108	125	3.44317	100	8.0413	222	0.727616	20	0.681043	17	0.830872	22	2.5e-05	-1.67277	down	2.25e-27	-4.2518	down	3.03e-08	2.44731	up	--	--	--	K12169|3.7e-06|ghi:107914376|K12169 Kip1 ubiquitination-promoting complex protein 1 [EC:2.3.2.27] | (RefSeq) E3 ubiquitin-protein ligase RKP	--	--	--	Zinc finger, C3HC4 type (RING finger)	--	O	Posttranslational modification, protein turnover, chaperones	PREDICTED: uncharacterized protein LOC104606503 isoform X2 [Nelumbo nucifera]
Nn1g03379	Nn1g03379	569.268	32781	546.051	37114	613.92	40631	114.076	6234	62.2322	4096	116.888	8858	3.89195	241	4.09903	233	13.7693	816	1.17e-17	-2.36899	down	5.38e-37	-5.87209	down	1.31e-10	3.34228	up	--	--	Molecular Function: hydrolase activity, hydrolyzing O-glycosyl compounds (GO:0004553);; Biological Process: carbohydrate metabolic process (GO:0005975);;	K19891|4.4e-107|smo:SELMODRAFT_442025|K19891 glucan endo-1,3-beta-glucosidase 1/2/3 [EC:3.2.1.39] | (RefSeq) hypothetical protein	Starch and sucrose metabolism (ko00500)	--	--	Glycosyl hydrolases family 17	Glucan endo-1,3-beta-glucosidase 12 OS=Arabidopsis thaliana OX=3702 GN=At4g29360 PE=2 SV=1	G	Carbohydrate transport and metabolism	PREDICTED: glucan endo-1,3-beta-glucosidase 12 [Nelumbo nucifera]
Nn1g03443	Nn1g03443	9.77158	736	9.78695	715	7.89869	682	2.88724	207	2.46308	211	2.76123	227	0.834198	67	0.862724	63	0.787903	61	1.4e-21	-1.61807	down	1.14e-50	-3.02141	down	1.82e-09	1.37711	up	--	--	Cellular Component: condensin complex (GO:0000796);; Biological Process: mitotic chromosome condensation (GO:0007076);; Biological Process: cell division (GO:0051301);;	K06676|0.0e+00|nnu:104588027|K06676 condensin complex subunit 2 | (RefSeq) condensin complex subunit 2	--	[BD]	Chromatin structure and dynamics;; Cell cycle control, cell division, chromosome partitioning	Condensin complex subunit 2	Condensin complex subunit 2 OS=Arabidopsis thaliana OX=3702 GN=CAPH PE=1 SV=1	--	--	PREDICTED: condensin complex subunit 2 [Nelumbo nucifera]
Nn1g03455	Nn1g03455	6.33069	241	7.05849	260	5.83803	254	1.44514	54	1.70482	73	1.50903	62	0.227124	11	0.236502	9	0.291237	12	1.34e-16	-1.88091	down	3.14e-33	-4.06847	down	5.74e-07	2.10887	up	--	--	Cellular Component: integral component of membrane (GO:0016021);; Molecular Function: polysaccharide binding (GO:0030247);;	--	--	--	--	Wall-associated receptor kinase galacturonan-binding	--	S	Function unknown	PREDICTED: uncharacterized protein LOC104588299 [Nelumbo nucifera]
Nn1g03456	Nn1g03456	256.646	5527	204.015	4132	170.285	5579	73.0814	1460	84.0196	2005	94.1665	2214	18.1559	550	26.0474	575	24.5254	733	4.07e-18	-1.31978	down	3.84e-57	-2.57152	down	5.58e-10	1.22888	up	--	--	Molecular Function: hydrolase activity (GO:0016787);;	--	--	[R]	General function prediction only	Dienelactone hydrolase family	--	Q	Secondary metabolites biosynthesis, transport and catabolism	PREDICTED: uncharacterized protein LOC104588300 [Nelumbo nucifera]
Nn1g03506	Nn1g03506	0.310261	14	0.106243	4	0.208362	10	39.3073	1794	20.9299	1113	20.3282	1109	477.129	24295	290.543	13325	119.205	5843	8.56e-67	6.93302	up	2.55e-77	10.7141	up	3.67e-12	-3.55199	down	[H]	Coenzyme transport and metabolism	Biological Process: isoprenoid biosynthetic process (GO:0008299);; Molecular Function: transferase activity (GO:0016740);;	K13789|1.2e-186|nnu:104610946|K13789 geranylgeranyl diphosphate synthase, type II [EC:2.5.1.1 2.5.1.10 2.5.1.29] | (RefSeq) heterodimeric geranylgeranyl pyrophosphate synthase small subunit, chloroplastic-like	Terpenoid backbone biosynthesis (ko00900)	[H]	Coenzyme transport and metabolism	Polyprenyl synthetase	Heterodimeric geranylgeranyl pyrophosphate synthase large subunit 1, chloroplastic OS=Arabidopsis thaliana OX=3702 GN=GGPPS1 PE=1 SV=2	H	Coenzyme transport and metabolism	PREDICTED: heterodimeric geranylgeranyl pyrophosphate synthase small subunit, chloroplastic-like [Nelumbo nucifera]
Nn1g03513	Nn1g03513	17.2584	747	19.4742	819	17.792	886	120.09	4931	145.793	7152	125.14	5885	29.4862	1357	43.4664	1813	26.4138	1170	6.52e-98	2.94559	up	1.66e-07	1.28059	up	7e-11	1.64342	up	[C]	Energy production and conversion	Biological Process: ATP synthesis coupled proton transport (GO:0015986);; Cellular Component: proton-transporting ATP synthase complex, catalytic core F(1) (GO:0045261);; Molecular Function: proton-transporting ATP synthase activity, rotational mechanism (GO:0046933);;	K02115|9.3e-183|nnu:104610940|K02115 F-type H+-transporting ATPase subunit gamma | (RefSeq) ATP synthase gamma chain, chloroplastic	Oxidative phosphorylation (ko00190);; Photosynthesis (ko00195)	[C]	Energy production and conversion	ATP synthase	ATP synthase gamma chain, chloroplastic OS=Nicotiana tabacum OX=4097 GN=ATPC PE=1 SV=1	C	Energy production and conversion	PREDICTED: ATP synthase gamma chain, chloroplastic [Nelumbo nucifera]
Nn1g03522	Nn1g03522	785.36	37686	894.047	41132	665.487	36749	137.759	6171	134.466	7239	169.463	8863	10.1894	528	12.7811	605	8.96025	449	4.91e-43	-2.27549	down	3.64e-166	-5.71611	down	2.56e-58	3.40336	up	--	--	Molecular Function: peroxidase activity (GO:0004601);; Cellular Component: extracellular region (GO:0005576);; Biological Process: response to oxidative stress (GO:0006979);; Molecular Function: heme binding (GO:0020037);; Biological Process: hydrogen peroxide catabolic process (GO:0042744);; Molecular Function: metal ion binding (GO:0046872);;	K00430|2.6e-76|nnu:104610931|K00430 peroxidase [EC:1.11.1.7] | (RefSeq) CP; ceruloplasmin (ferroxidase)	Phenylpropanoid biosynthesis (ko00940)	--	--	Peroxidase	Peroxidase 42 OS=Arabidopsis thaliana OX=3702 GN=PER42 PE=1 SV=2	Q	Secondary metabolites biosynthesis, transport and catabolism	ceruloplasmin precursor [Nelumbo nucifera]
Nn1g03539	Nn1g03539	1.3979	22	2.91015	43	4.00931	71	15.0921	219	9.6677	168	10.6234	177	28.0351	455	29.1419	429	71.7683	1118	9.91e-07	2.0785	up	2.6e-17	4.23337	up	1.38e-06	-2.07107	down	--	--	--	--	--	--	--	--	--	--	--	PREDICTED: uncharacterized protein LOC104610919 [Nelumbo nucifera]
Nn1g03565	Nn1g03565	7.28634	1230	8.12853	1366	5.62305	1118	0.399247	68	0.406414	82	0.615778	119	0.173772	33	0.111454	20	0.114409	21	7.72e-51	-3.6476	down	1.64e-69	-5.16704	down	0.000565232	1.43487	up	--	--	Molecular Function: protein binding (GO:0005515);;	K16743|0.0e+00|nnu:104610905|K16743 abnormal spindle-like microcephaly-associated protein | (RefSeq) abnormal spindle-like microcephaly-associated protein homolog	--	[Z]	Cytoskeleton	IQ calmodulin-binding motif	--	Z	Cytoskeleton	PREDICTED: abnormal spindle-like microcephaly-associated protein homolog isoform X3 [Nelumbo nucifera]
Nn1g03568	Nn1g03568	14.735	1243	13.949	1066	10.8842	1061	48.0653	3879	60.2927	5533	25.6824	2234	165.357	13723	222.688	17044	133.652	10601	7.07e-09	1.83278	up	3.21e-59	4.05383	up	2.76e-08	-2.13193	down	--	--	--	--	--	--	--	--	--	--	--	PREDICTED: uncharacterized protein LOC104610902 [Nelumbo nucifera]
Nn1g03571	Nn1g03571	0.046603	2	0	0	0	0	12.1354	397	13.6101	532	3.78855	142	113.401	4145	61.7937	2051	14.1792	499	2.65e-26	7.20299	up	3.93e-18	9.9797	up	9.62e-05	-2.68553	down	--	--	Biological Process: protein polyubiquitination (GO:0000209);; Molecular Function: molecular_function (GO:0003674);; Molecular Function: catalytic activity (GO:0003824);; Molecular Function: ubiquitin-protein transferase activity (GO:0004842);; Molecular Function: binding (GO:0005488);; Molecular Function: protein binding (GO:0005515);; Cellular Component: cellular_component (GO:0005575);; Cellula…	K20417|3.4e-172|nnu:104610901|K20417 palmitoyl-[glycerolipid] 3-(E)-desaturase [EC:1.14.19.43] | (RefSeq) fatty acid desaturase 4, chloroplastic-like	--	[O]	Posttranslational modification, protein turnover, chaperones	B domain of TMEM189, localisation domain	Fatty acid desaturase 4, chloroplastic OS=Arabidopsis thaliana OX=3702 GN=FAD4 PE=1 SV=1	O	Posttranslational modification, protein turnover, chaperones	PREDICTED: fatty acid desaturase 4, chloroplastic-like [Nelumbo nucifera]
Nn1g03645	Nn1g03645	0.031802	2	0.075244	5	0	0	3.28443	121	4.39268	192	2.48474	103	9.62998	400	10.0002	392	10.3626	429	1.64e-19	5.24999	up	3.39e-47	7.66804	up	5.42e-12	-1.89296	down	--	--	Molecular Function: peroxidase activity (GO:0004601);; Cellular Component: extracellular region (GO:0005576);; Biological Process: response to oxidative stress (GO:0006979);; Molecular Function: heme binding (GO:0020037);; Biological Process: hydrogen peroxide catabolic process (GO:0042744);; Molecular Function: metal ion binding (GO:0046872);;	K00430|9.2e-75|nnu:104585680|K00430 peroxidase [EC:1.11.1.7] | (RefSeq) peroxidase 3-like	Phenylpropanoid biosynthesis (ko00940)	--	--	Peroxidase	Peroxidase 3 OS=Arabidopsis thaliana OX=3702 GN=PER3 PE=2 SV=1	Q	Secondary metabolites biosynthesis, transport and catabolism	PREDICTED: peroxidase 3-like [Nelumbo nucifera]
Nn1g03662	Nn1g03662	3.17272	256	2.58676	199	3.34072	284	10.0436	672	6.8761	550	10.7123	779	1.22171	79	0.805222	56	1.49335	126	5.19e-13	1.53326	up	0.00161897	-1.04095	down	1.38e-13	2.52729	up	--	--	--	K09287|1.4e-50|boe:106300667|K09287 RAV-like factor | (RefSeq) AP2/ERF and B3 domain-containing transcription factor At1g51120-like	--	--	--	--	--	--	--	PREDICTED: uncharacterized protein LOC104585691 [Nelumbo nucifera]
Nn1g03679	Nn1g03679	1.54413	130	0.685799	98	1.46688	188	4.17867	567	3.09211	526	4.10651	736	17.2243	2112	5.02321	646	8.19844	1170	2.03e-19	2.2193	up	4.05e-17	3.64194	up	0.00154016	-1.3978	down	--		Molecular Function: nucleic acid binding (GO:0003676);; Molecular Function: protein serine/threonine kinase activity (GO:0004674);; Molecular Function: ATP binding (GO:0005524);; Biological Process: DNA integration (GO:0015074);; Cellular Component: integral component of membrane (GO:0016021);;	K24104|1.1e-76|thj:104799061|K24104 GPN-loop GTPase | (RefSeq) LOW QUALITY PROTEIN: uncharacterized protein LOC104799061	--	--	--	Protein tyrosine and serine/threonine kinase	Receptor-like serine/threonine-protein kinase SD1-7 OS=Arabidopsis thaliana OX=3702 GN=SD17 PE=1 SV=1	--	--	PREDICTED: LOW QUALITY PROTEIN: uncharacterized protein LOC104585710 [Nelumbo nucifera]
Nn1g03683	Nn1g03683	0.817258	52	1.09354	67	0.840102	61	7.11978	426	9.04549	646	6.02987	413	0.166316	12	0.029552	2	0.090186	6	2.11e-31	3.06788	up	1.55e-05	-2.63764	down	2.1e-35	5.56075	up	--	--	Molecular Function: magnesium ion binding (GO:0000287);; Molecular Function: terpene synthase activity (GO:0010333);;	K15803|0.0e+00|nnu:104590893|K15803 (-)-germacrene D synthase [EC:4.2.3.75] | (RefSeq) (-)-germacrene D synthase-like	Sesquiterpenoid and triterpenoid biosynthesis (ko00909)	--	--	Terpene synthase family, metal binding domain	(-)-germacrene D synthase OS=Vitis vinifera OX=29760 GN=VIT_19s0014g04930 PE=1 SV=1	S	Function unknown	PREDICTED: (-)-germacrene D synthase-like [Nelumbo nucifera]
Nn1g03714	Nn1g03714	17.7601	1417	19.5935	1531	13.7103	1248	1.02492	80	0.759631	69	1.41346	122	0.063844	7	0.148227	14	0.091915	9	2.23e-48	-3.79303	down	6.33e-78	-6.60366	down	6.54e-08	2.65271	up	--	--	Molecular Function: microtubule motor activity (GO:0003777);; Molecular Function: ATP binding (GO:0005524);; Cellular Component: microtubule (GO:0005874);; Biological Process: microtubule-based movement (GO:0007018);; Molecular Function: microtubule binding (GO:0008017);;	K10405|0.0e+00|nnu:104590163|K10405 kinesin family member C1 | (RefSeq) kinesin-like protein KIN-14D	--	[Z]	Cytoskeleton	Kinesin motor domain	Kinesin-like protein KIN-14C OS=Arabidopsis thaliana OX=3702 GN=KIN14C PE=2 SV=1	Z	Cytoskeleton	PREDICTED: kinesin-like protein KIN-14D [Nelumbo nucifera]
Nn1g03735	Nn1g03735	4.80021	230	4.52351	236	4.59098	283	11.5315	585	10.7013	556	7.32306	449	36.5676	1977	50.9862	2453	64.6017	3416	2.85e-08	1.18532	up	2.53e-61	3.82139	up	3.61e-21	-2.60531	down	[M]	Cell wall/membrane/envelope biogenesis	Molecular Function: catalytic activity (GO:0003824);;	K13082|1.8e-21|vvi:100259090|K13082 bifunctional dihydroflavonol 4-reductase/flavanone 4-reductase [EC:1.1.1.219 1.1.1.234] | (RefSeq) bifunctional dihydroflavonol 4-reductase/flavanone 4-reductase	Flavonoid biosynthesis (ko00941)	[V]	Defense mechanisms	NAD(P)H-binding	Putative anthocyanidin reductase OS=Ginkgo biloba OX=3311 PE=2 SV=1	V	Defense mechanisms	PREDICTED: dihydroflavonol 4-reductase isoform X1 [Nelumbo nucifera]
Nn1g03740	Nn1g03740	1250.62	53393	1038.69	43230	1108.06	55186	318.551	12042	440.46	19979	316.516	13769	33.3584	440	27.0169	276	32.9712	347	1.76e-20	-1.62247	down	5.06e-272	-6.67909	down	1.16e-89	4.98235	up	[M]	Cell wall/membrane/envelope biogenesis	Molecular Function: catalytic activity (GO:0003824);;	K08695|7.2e-192|nnu:104585744|K08695 anthocyanidin reductase [EC:1.3.1.77] | (RefSeq) anthocyanidin reductase	Flavonoid biosynthesis (ko00941)	[V]	Defense mechanisms	NAD dependent epimerase/dehydratase family	Anthocyanidin reductase ((2S)-flavan-3-ol-forming) OS=Vitis vinifera OX=29760 GN=ANR PE=1 SV=1	V	Defense mechanisms	PREDICTED: anthocyanidin reductase [Nelumbo nucifera]
Nn1g03748	Nn1g03748	1.16725	59	1.56853	76	1.61792	93	4.62322	220	2.96394	169	4.60452	251	0.05863	4	0.233211	12	0.223185	12	1.92e-07	1.56181	up	8.87e-07	-2.50336	down	7.98e-19	3.96367	up	--	--	--	K14494|6.1e-37|cpep:111808796|K14494 DELLA protein | (RefSeq) DELLA protein GAIP	Plant hormone signal transduction (ko04075)	--	--	GRAS domain family	Scarecrow-like protein 32 OS=Arabidopsis thaliana OX=3702 GN=SCL32 PE=1 SV=1	K	Transcription	PREDICTED: scarecrow-like protein 32 [Nelumbo nucifera]
Nn1g03776	Nn1g03776	0.206522	17	0.296918	23	0.675368	62	21.6904	1538	13.6605	1152	16.3187	1335	59.0151	4648	37.7271	2694	33.9243	2627	3.72e-43	5.22042	up	3.73e-55	6.97006	up	6.09e-07	-1.61832	down	[IQ]	Lipid transport and metabolism;; Secondary metabolites biosynthesis, transport and catabolism	Biological Process: biological_process (GO:0008150);; Biological Process: response to radiation (GO:0009314);; Biological Process: response to light stimulus (GO:0009416);; Biological Process: response to abiotic stimulus (GO:0009628);; Biological Process: response to endogenous stimulus (GO:0009719);; Biological Process: response to hormone (GO:0009725);; Biological Process: response to auxin (G…	K14487|0.0e+00|nnu:104585725|K14487 auxin responsive GH3 gene family | (RefSeq) indole-3-acetic acid-amido synthetase GH3.6	Plant hormone signal transduction (ko04075)	--	--	GH3 auxin-responsive promoter	Indole-3-acetic acid-amido synthetase GH3.6 OS=Arabidopsis thaliana OX=3702 GN=GH3.6 PE=1 SV=1	S	Function unknown	PREDICTED: indole-3-acetic acid-amido synthetase GH3.6 [Nelumbo nucifera]
Nn1g03786	Nn1g03786	0.120723	9	0.111444	8	0.016225	2	3.62445	204	6.11891	383	2.70367	175	0.847637	58	1.55607	88	1.20945	69	2.8e-23	4.96099	up	1.82e-11	3.81747	up	0.000529583	1.39283	up	--	--	Cellular Component: integral component of membrane (GO:0016021);; Molecular Function: kinase activity (GO:0016301);; Molecular Function: carbohydrate binding (GO:0030246);; Biological Process: recognition of pollen (GO:0048544);;	K03327|3.9e-21|cic:CICLE_v10018703mg|K03327 multidrug resistance protein, MATE family | (RefSeq) hypothetical protein	--	--	--	S-locus glycoprotein domain	G-type lectin S-receptor-like serine/threonine-protein kinase RKS1 OS=Arabidopsis thaliana OX=3702 GN=RKS1 PE=3 SV=3	T	Signal transduction mechanisms	PREDICTED: G-type lectin S-receptor-like serine/threonine-protein kinase RKS1 [Nelumbo nucifera]
Nn1g03867	Nn1g03867	21.7537	2481	13.8946	2187	19.7923	2425	77.1363	5955	68.8396	6201	34.3729	3997	268.17	23240	232.41	20469	201.246	25785	7.94e-09	1.28043	up	2.49e-237	3.73772	up	1.19e-22	-2.42134	down	--	--	Biological Process: regulation of transcription, DNA-templated (GO:0006355);; Molecular Function: protein dimerization activity (GO:0046983);;	K18878|7.5e-28|cann:107866053|K18878 BHLH transcription factor Upa20 | (RefSeq) Upa20; transcription factor bHLH137-like	Plant-pathogen interaction (ko04626)	--	--	Helix-loop-helix DNA-binding domain	Transcription factor bHLH79 OS=Arabidopsis thaliana OX=3702 GN=BHLH79 PE=1 SV=1	K	Transcription	PREDICTED: transcription factor bHLH79-like isoform X1 [Nelumbo nucifera]
Nn1g03882	Nn1g03882	1.81673	139	2.26512	168	1.50154	132	3.86436	281	5.22505	454	3.47804	290	0.050708	5	0.093059	7	0.104214	9	6.69e-06	1.271	up	5.55e-18	-3.87268	down	3.44e-34	5.02158	up	--	--	Molecular Function: ion channel activity (GO:0005216);; Cellular Component: integral component of membrane (GO:0016021);;	K05391|0.0e+00|nnu:104605692|K05391 cyclic nucleotide gated channel, plant | (RefSeq) cyclic nucleotide-gated ion channel 4-like	Plant-pathogen interaction (ko04626)	[PT]	Inorganic ion transport and metabolism;; Signal transduction mechanisms	Cyclic nucleotide-binding domain	Cyclic nucleotide-gated ion channel 4 OS=Arabidopsis thaliana OX=3702 GN=CNGC4 PE=2 SV=2	P	Inorganic ion transport and metabolism	PREDICTED: cyclic nucleotide-gated ion channel 4-like [Nelumbo nucifera]
Nn1g03912	Nn1g03912	119.352	4159	149.242	4993	109.114	4330	354.627	11722	460.999	18202	409.091	15483	37.6706	1406	59.4291	2012	37.2826	1339	5.93e-23	1.809	up	8.04e-05	-1.04309	down	4.48e-29	2.82674	up	--	--	Cellular Component: photosystem I (GO:0009522);; Cellular Component: photosystem II (GO:0009523);; Cellular Component: chloroplast thylakoid membrane (GO:0009535);; Biological Process: photosynthesis, light harvesting (GO:0009765);; Cellular Component: integral component of membrane (GO:0016021);; Molecular Function: chlorophyll binding (GO:0016168);; Biological Process: protein-chromophore linka…	K08914|4.0e-119|nnu:104612608|K08914 light-harvesting complex II chlorophyll a/b binding protein 3 | (RefSeq) chlorophyll a-b binding protein 13, chloroplastic-like	Photosynthesis - antenna proteins (ko00196)	--	--	Chlorophyll A-B binding protein	Chlorophyll a-b binding protein 13, chloroplastic OS=Solanum lycopersicum OX=4081 GN=CAB13 PE=1 SV=1	C	Energy production and conversion	PREDICTED: chlorophyll a-b binding protein 13, chloroplastic-like [Nelumbo nucifera]
Nn1g03959	Nn1g03959	40.0758	1939	44.6272	1992	31.4811	1721	18.7834	861	8.53255	482	19.4108	1039	0.600256	30	0.821876	35	1.27912	73	0.000520652	-1.11436	down	2.22e-47	-4.87247	down	7.26e-16	3.601	up	--	--	--	--	--	--	--	--	--	--	--	PREDICTED: uncharacterized protein LOC104612572 [Nelumbo nucifera]
Nn1g03986	Nn1g03986	12.7104	784	9.42763	582	13.2881	918	23.2232	1320	30.6497	2183	14.5517	1070	138.371	9735	91.6855	5869	63.2752	4314	0.000115491	1.08512	up	4.44e-27	3.56095	up	9.03e-10	-2.41478	down	--	--	Molecular Function: DNA binding (GO:0003677);; Cellular Component: nucleus (GO:0005634);; Biological Process: regulation of transcription, DNA-templated (GO:0006355);;	K00521|1.5e-31|cmos:111447866|K00521 ferric-chelate reductase [EC:1.16.1.7] | (RefSeq) ferric reduction oxidase 7, chloroplastic-like	--	--	--	No apical meristem (NAM) protein	NAC transcription factor 56 OS=Arabidopsis thaliana OX=3702 GN=NAC056 PE=2 SV=1	K	Transcription	PREDICTED: NAC transcription factor 56-like [Nelumbo nucifera]
Nn1g03987	Nn1g03987	0.423601	21	0.554265	23	1.59987	81	7.65648	320	21.5489	1071	4.77092	220	65.7776	3117	39.4973	1701	21.8464	966	1.45e-08	3.39572	up	9.81e-25	5.85911	up	0.000891722	-2.0614	down	--	--	Molecular Function: DNA binding (GO:0003677);; Cellular Component: nucleus (GO:0005634);; Biological Process: regulation of transcription, DNA-templated (GO:0006355);;	K00521|1.9e-44|cmos:111447866|K00521 ferric-chelate reductase [EC:1.16.1.7] | (RefSeq) ferric reduction oxidase 7, chloroplastic-like	--	--	--	No apical meristem (NAM) protein	NAC domain-containing protein JA2L OS=Solanum lycopersicum OX=4081 GN=JA2L PE=2 SV=1	K	Transcription	PREDICTED: NAC domain-containing protein 72-like [Nelumbo nucifera]
Nn1g03988	Nn1g03988	7.99464	157	6.44187	123	6.17867	139	51.4452	957	48.2048	1072	57.4448	1224	22.6684	472	20.1427	381	7.41153	149	3.16e-82	3.03181	up	0.000209263	1.69383	up	0.00458606	1.26569	up	--	--	Biological Process: photosystem II assembly (GO:0010207);;	K08902|3.1e-90|nnu:104612550|K08902 photosystem II Psb27 protein | (RefSeq) photosystem II repair protein PSB27-H1, chloroplastic	Photosynthesis (ko00195)	--	--	Photosystem II Pbs27	Photosystem II repair protein PSB27-H1, chloroplastic OS=Arabidopsis thaliana OX=3702 GN=PSB27-1 PE=1 SV=1	S	Function unknown	PREDICTED: photosystem II repair protein PSB27-H1, chloroplastic [Nelumbo nucifera]
Nn1g03999	Nn1g03999	4.85522	100	2.88895	58	3.29328	78	22.2306	435	30.252	707	21.4534	481	63.3524	1387	72.5452	1442	39.1989	825	2.87e-26	2.81735	up	1.18e-40	4.37874	up	2.25e-06	-1.52295	down	--	--	Cellular Component: integral component of membrane (GO:0016021);;	--	--	--	--	Protein of unknown function (DUF1218)	--	S	Function unknown	PREDICTED: uncharacterized protein LOC104586458 [Nelumbo nucifera]
Nn1g04004	Nn1g04004	182.008	9421	236.039	11706	153.357	9117	480.594	23539	381.69	22568	545.107	30580	22.4222	1224	20.7179	1044	34.5122	1861	5e-11	1.40677	up	3.77e-19	-2.42947	down	1.03e-48	3.80229	up	[IQR]	Lipid transport and metabolism;; Secondary metabolites biosynthesis, transport and catabolism;; General function prediction only	Cellular Component: chloroplast (GO:0009507);; Biological Process: photosynthesis (GO:0015979);; Biological Process: chlorophyll biosynthetic process (GO:0015995);; Molecular Function: protochlorophyllide reductase activity (GO:0016630);;	K00218|1.0e-198|nnu:104586453|K00218 protochlorophyllide reductase [EC:1.3.1.33] | (RefSeq) protochlorophyllide reductase-like	Porphyrin and chlorophyll metabolism (ko00860)	[Q]	Secondary metabolites biosynthesis, transport and catabolism	short chain dehydrogenase	Protochlorophyllide reductase, chloroplastic OS=Daucus carota OX=4039 GN=POR1 PE=2 SV=1	Q	Secondary metabolites biosynthesis, transport and catabolism	PREDICTED: protochlorophyllide reductase-like [Nelumbo nucifera]
Nn1g04008	Nn1g04008	10.6946	776	11.412	807	11.1132	836	4.11984	335	3.94837	305	5.07502	416	0.146795	14	0.097718	10	0.388661	31	3.99e-09	-1.08752	down	4.55e-47	-4.96356	down	3.82e-20	3.76404	up	[V]	Defense mechanisms	Molecular Function: catalytic activity (GO:0003824);;	--	--	[V]	Defense mechanisms	Lanthionine synthetase C-like protein	LanC-like protein GCL2 OS=Arabidopsis thaliana OX=3702 GN=GCL2 PE=2 SV=1	V	Defense mechanisms	PREDICTED: lanC-like protein GCL2 isoform X3 [Nelumbo nucifera]
Nn1g04023	Nn1g04023	41.2991	2064	31.1946	1517	35.2554	2030	10.3995	492	15.6555	898	12.9203	717	0.500169	26	0.457805	24	1.74644	89	1.02e-10	-1.30935	down	6.24e-25	-4.79792	down	1.89e-11	3.3576	up	--	--	--	--	--	--	--	--	CBS domain-containing protein CBSX5 OS=Arabidopsis thaliana OX=3702 GN=CBSX5 PE=2 SV=2	L	Replication, recombination and repair	PREDICTED: CBS domain-containing protein CBSX5-like [Nelumbo nucifera]
Nn1g04068	Nn1g04068	0.078728	13	0.133017	21	0.117063	22	0.264561	41	0.301642	56	0.224765	40	0.8406	144	1.24392	194	1.42875	236	0.00384563	1.31088	up	7.58e-26	3.76391	up	3.18e-14	-2.38017	down	--	--	--	--	--	--	--	--	--	--	--	PREDICTED: uncharacterized protein LOC104602813 isoform X1 [Nelumbo nucifera]
Nn1g04069	Nn1g04069	9.72967	360	11.6376	413	11.0924	456	24.3103	819	34.519	1432	16.8994	681	81.8588	3176	80.6911	2844	69.1709	2655	6.81e-06	1.31283	up	1.32e-91	3.26802	up	4.11e-10	-1.9036	down	--	--	Cellular Component: integral component of membrane (GO:0016021);; Molecular Function: metal ion binding (GO:0046872);;	K10666|3.0e-153|nnu:104608240|K10666 E3 ubiquitin-protein ligase RNF5 [EC:2.3.2.27] | (RefSeq) E3 ubiquitin-protein ligase RMA1H1-like	Protein processing in endoplasmic reticulum (ko04141)	[O]	Posttranslational modification, protein turnover, chaperones	Zinc finger, C3HC4 type (RING finger)	E3 ubiquitin-protein ligase RMA1H1 OS=Capsicum annuum OX=4072 GN=RMA1H1 PE=1 SV=1	O	Posttranslational modification, protein turnover, chaperones	PREDICTED: E3 ubiquitin-protein ligase RMA1H1-like [Nelumbo nucifera]
Nn1g04079	Nn1g04079	2.43584	77	1.84683	57	2.48427	90	5.76665	174	5.41674	195	5.867	202	0.659368	23	0.679706	21	0.764134	25	1.62e-10	1.43864	up	0.000357196	-1.22118	down	1.92e-21	2.63805	up	[H]	Coenzyme transport and metabolism	Molecular Function: molecular_function (GO:0003674);; Molecular Function: catalytic activity (GO:0003824);; Molecular Function: riboflavin synthase activity (GO:0004746);; Biological Process: vitamin metabolic process (GO:0006766);; Biological Process: water-soluble vitamin metabolic process (GO:0006767);; Biological Process: riboflavin metabolic process (GO:0006771);; Biological Process: nitroge…	K00793|2.6e-158|nnu:104608234|K00793 riboflavin synthase [EC:2.5.1.9] | (RefSeq) riboflavin synthase-like	Riboflavin metabolism (ko00740)	[H]	Coenzyme transport and metabolism	Lumazine binding domain	--	H	Coenzyme transport and metabolism	PREDICTED: riboflavin synthase-like [Nelumbo nucifera]
Nn1g04130	Nn1g04130	3.12608	93	3.54535	89	3.62305	117	15.839	453	10.8052	362	12.1722	433	18.617	649	25.0272	725	23.1038	783	2.05e-21	2.14721	up	8.64e-85	3.30173	up	3.63e-07	-1.12956	down	--	--	Molecular Function: electron carrier activity (GO:0009055);;	--	--	--	--	Plastocyanin-like domain	Early nodulin-like protein 1 OS=Oryza sativa subsp. japonica OX=39947 GN=ENODL1 PE=1 SV=1	S	Function unknown	PREDICTED: early nodulin-like protein 2 [Nelumbo nucifera]
Nn1g04163	Nn1g04163	66.4816	888	42.6542	552	44.2698	678	8.76232	112	15.558	236	9.45299	138	0.219373	4	0.707077	10	0.561934	8	2.95e-11	-1.98915	down	6.31e-50	-6.03273	down	4.88e-15	3.84526	up	--	--	--	--	--	--	--	Dormancy/auxin associated protein	Auxin-repressed 12.5 kDa protein OS=Fragaria ananassa OX=3747 PE=2 SV=1	S	Function unknown	PREDICTED: auxin-repressed 12.5 kDa protein [Nelumbo nucifera]
Nn1g04164	Nn1g04164	1.42598	72	6.86745	300	4.31035	221	62.2551	2674	42.5503	2159	96.0766	4668	0	0	0.017349	2	0.01617	1	4.11e-09	3.60384	up	2.81e-13	-6.54466	down	2.51e-59	9.85661	up	[K]	Transcription	Molecular Function: O-methyltransferase activity (GO:0008171);; Biological Process: methylation (GO:0032259);; Molecular Function: protein dimerization activity (GO:0046983);;	K16040|4.2e-54|rcu:8285028|K16040 trans-resveratrol di-O-methyltransferase [EC:2.1.1.240] | (RefSeq) probable O-methyltransferase 3	Stilbenoid, diarylheptanoid and gingerol biosynthesis (ko00945)	[R]	General function prediction only	O-methyltransferase domain	(RS)-norcoclaurine 6-O-methyltransferase OS=Thalictrum flavum subsp. glaucum OX=150095 PE=1 SV=1	J	Translation, ribosomal structure and biogenesis	PREDICTED: (RS)-norcoclaurine 6-O-methyltransferase-like [Nelumbo nucifera]
Nn1g04165	Nn1g04165	6.82869	610	8.18915	710	5.27316	540	0.475245	41	0.363861	37	0.449	44	0	0	0	0	0	0	5.61e-45	-3.76438	down	4.96e-19	-9.89209	down	5.25e-09	5.36506	up	--	--	Cellular Component: spindle (GO:0005819);; Cellular Component: microtubule (GO:0005874);; Biological Process: activation of protein kinase activity (GO:0032147);; Biological Process: regulation of mitotic spindle organization (GO:0060236);;	K16812|0.0e+00|nnu:104608179|K16812 targeting protein for Xklp2 | (RefSeq) protein TPX2-like	--	--	--	Cell cycle regulated microtubule associated protein	Protein TPX2 OS=Arabidopsis thaliana OX=3702 GN=TPX2 PE=1 SV=1	S	Function unknown	PREDICTED: protein TPX2-like [Nelumbo nucifera]
Nn1g04212	Nn1g04212	10.4321	589	14.4268	784	7.55573	503	1.24283	65	0.747054	50	1.02524	69	0.02543	3	0	0	0	0	1.23e-24	-3.17654	down	2.4e-28	-8.29231	down	4.39e-10	4.67289	up	--	--	--	K20720|2.8e-33|psom:113322205|K20720 reticulon-4 | (RefSeq) reticulon-like protein B21 isoform X1	--	--	--	Reticulon	Reticulon-like protein B17 OS=Arabidopsis thaliana OX=3702 GN=RTNLB17 PE=2 SV=1	S	Function unknown	PREDICTED: reticulon-like protein B17 isoform X1 [Nelumbo nucifera]
Nn1g04251	Nn1g04251	0.85195	57	0.954813	64	1.31921	100	14.3749	949	7.24231	521	10.9807	755	11.943	908	21.4781	1452	34.6088	2505	1.92e-24	3.36337	up	7.56e-35	4.84709	up	0.00198448	-1.39384	down	--	--	Biological Process: reproduction (GO:0000003);; Molecular Function: regulatory region nucleic acid binding (GO:0001067);; Biological Process: developmental process involved in reproduction (GO:0003006);; Molecular Function: molecular_function (GO:0003674);; Molecular Function: nucleic acid binding (GO:0003676);; Molecular Function: DNA binding (GO:0003677);; Molecular Function: transcription fact…	K12309|8.1e-06|lja:Lj3g3v0323160.1|K12309 beta-galactosidase [EC:3.2.1.23] | (RefSeq) Lj3g3v0323160.1; -	Galactose metabolism (ko00052);; Other glycan degradation (ko00511);; Glycosaminoglycan degradation (ko00531);; Sphingolipid metabolism (ko00600);; Glycosphingolipid biosynthesis - ganglio series (ko00604)	[R]	General function prediction only	--	Zinc finger protein MAGPIE OS=Arabidopsis thaliana OX=3702 GN=MGP PE=1 SV=1	S	Function unknown	PREDICTED: zinc finger protein MAGPIE-like [Nelumbo nucifera]
Nn1g04330	Nn1g04330	6.86162	345	7.26973	346	5.69355	321	35.4469	1662	10.4804	596	17.7595	948	35.2791	1856	54.5817	2601	77.978	3939	2.2e-05	1.72129	up	1.18e-31	3.46226	up	0.000931453	-1.61257	down	--	--	Molecular Function: transcription factor activity, sequence-specific DNA binding (GO:0003700);;	--	--	--	--	--	--	--	--	PREDICTED: uncharacterized protein LOC104613161 [Nelumbo nucifera]
Nn1g04445	Nn1g04445	3.38607	153	3.54761	162	3.83222	204	17.8204	792	22.0108	1162	18.6276	889	8.51307	412	6.91223	307	6.66707	299	3.45e-45	2.52665	up	1.49e-10	1.42604	up	1.92e-06	1.09562	up	[O]	Posttranslational modification, protein turnover, chaperones	Molecular Function: cysteine-type peptidase activity (GO:0008234);;	K16290|1.4e-76|egu:105050471|K16290 xylem cysteine proteinase [EC:3.4.22.-] | (RefSeq) cysteine protease XCP1	--	[O]	Posttranslational modification, protein turnover, chaperones	Papain family cysteine protease	P34 probable thiol protease OS=Glycine max OX=3847 PE=1 SV=1	O	Posttranslational modification, protein turnover, chaperones	PREDICTED: zingipain-2-like isoform X1 [Nelumbo nucifera]
Nn1g04481	Nn1g04481	8.38146	450	8.95153	456	6.65198	412	30.5016	1558	37.8476	2297	37.9191	2231	0.520789	30	0.408509	19	0.731279	42	1.93e-39	2.26588	up	1.31e-28	-3.39067	down	1.22e-90	5.59144	up	[G]	Carbohydrate transport and metabolism	Molecular Function: hydrolase activity, hydrolyzing O-glycosyl compounds (GO:0004553);; Biological Process: carbohydrate metabolic process (GO:0005975);;	K05350|0.0e+00|nnu:104609759|K05350 beta-glucosidase [EC:3.2.1.21] | (RefSeq) beta-glucosidase 18-like	Cyanoamino acid metabolism (ko00460);; Starch and sucrose metabolism (ko00500);; Phenylpropanoid biosynthesis (ko00940)	[G]	Carbohydrate transport and metabolism	Glycosyl hydrolase family 1	Beta-glucosidase 18 OS=Oryza sativa subsp. japonica OX=39947 GN=BGLU18 PE=3 SV=2	G	Carbohydrate transport and metabolism	PREDICTED: beta-glucosidase 18-like [Nelumbo nucifera]
Nn1g04483	Nn1g04483	52.0496	2345	50.6703	2213	49.1937	2541	17.3343	742	16.6644	853	19.3246	948	3.17202	152	3.31245	145	3.42458	158	4.15e-41	-1.38004	down	2.29e-189	-3.50421	down	1.7e-40	2.10346	up	--		Molecular Function: protein serine/threonine kinase activity (GO:0004674);; Molecular Function: ATP binding (GO:0005524);; Cellular Component: integral component of membrane (GO:0016021);;	K13430|1.2e-87|jcu:105644862|K13430 serine/threonine-protein kinase PBS1 [EC:2.7.11.1] | (RefSeq) serine/threonine-protein kinase PBS1	Plant-pathogen interaction (ko04626)	[T]	Signal transduction mechanisms	Protein tyrosine and serine/threonine kinase	Serine/threonine-protein kinase PBS1 OS=Arabidopsis thaliana OX=3702 GN=PBS1 PE=1 SV=1	T	Signal transduction mechanisms	PREDICTED: serine/threonine-protein kinase CDL1 [Nelumbo nucifera]
Nn1g04507	Nn1g04507	5.06235	252	4.32207	209	4.89821	281	12.899	622	23.2519	1312	9.93244	538	60.4636	3226	76.7728	3692	31.9519	1621	1.06e-07	1.77084	up	2.21e-30	3.95794	up	3.11e-06	-2.09098	down	--	--	Molecular Function: iron ion binding (GO:0005506);; Molecular Function: electron carrier activity (GO:0009055);;	--	--	--	--	--	--	O	Posttranslational modification, protein turnover, chaperones	PREDICTED: uncharacterized protein LOC104609738 [Nelumbo nucifera]
Nn1g04509	Nn1g04509	23.0055	597	15.6129	393	18.0588	537	5.11885	127	12.9643	382	6.29343	178	2.94381	82	1.85436	47	1.61163	43	0.00813774	-1.03439	down	1.12e-16	-2.66238	down	0.00225952	1.51698	up	--	--	--	--	--	--	--	Protein of unknown function (DUF1685)	--	--	--	PREDICTED: uncharacterized protein LOC104609737 [Nelumbo nucifera]
Nn1g04513	Nn1g04513	16.402	1105	13.6228	912	15.8799	1233	4.83981	295	10.2048	794	5.61885	391	0	0	0	0	0	0	0.00215115	-1.02484	down	3.88e-23	-10.619	down	1.12e-25	8.26774	up	--	--	Cellular Component: integral component of membrane (GO:0016021);; Molecular Function: transferase activity, transferring glycosyl groups (GO:0016757);;	K08238|3.8e-84|sind:105157058|K08238 xyloglucan 6-xylosyltransferase [EC:2.4.2.39] | (RefSeq) xyloglucan 6-xylosyltransferase 2-like	--	[GM]	Carbohydrate transport and metabolism;; Cell wall/membrane/envelope biogenesis	galactosyl transferase GMA12/MNN10 family	Galactomannan galactosyltransferase 1 OS=Cyamopsis tetragonoloba OX=3832 GN=GMGT1 PE=1 SV=1	--	--	PREDICTED: galactomannan galactosyltransferase 1-like [Nelumbo nucifera]
Nn1g04569	Nn1g04569	8.48069	321	8.78037	311	9.88873	415	3.38489	123	3.7173	154	4.30461	177	0.424847	17	0.41262	17	0.409713	15	6.6e-09	-1.09457	down	2.91e-44	-3.92514	down	7.3e-17	2.76865	up	--	--	--	--	--	--	--	--	--	--	--	PREDICTED: uncharacterized protein LOC104590388 isoform X2 [Nelumbo nucifera]
Nn1g04593	Nn1g04593	6.62866	466	6.2345	425	7.53717	607	2.10506	141	1.52158	122	2.62167	201	0.186262	14	0.163191	12	0.282682	21	1.09e-10	-1.55511	down	2.11e-54	-4.49694	down	1.76e-12	2.8388	up	--	--	Biological Process: positive gravitropism (GO:0009958);;	--	--	--	--	NPH3 family	BTB/POZ domain-containing protein NPY2 OS=Arabidopsis thaliana OX=3702 GN=NPY2 PE=2 SV=1	S	Function unknown	PREDICTED: BTB/POZ domain-containing protein NPY2 [Nelumbo nucifera]
Nn1g04636	Nn1g04636	8.5986	334	7.53733	282	7.9883	355	83.0587	3057	55.2096	2413	47.9051	2009	127.947	5243	101.656	3772	102.691	4068	1.22e-38	3.02319	up	4.05e-127	4.19776	up	0.000101137	-1.12836	down	[HR]	Coenzyme transport and metabolism;; General function prediction only	Cellular Component: cellular_component (GO:0005575);; Cellular Component: intracellular (GO:0005622);; Cellular Component: cell (GO:0005623);; Cellular Component: nucleus (GO:0005634);; Cellular Component: cytoplasm (GO:0005737);; Biological Process: multicellular organism development (GO:0007275);; Biological Process: biological_process (GO:0008150);; Biological Process: response to radiation (G…	--	--	--	--	Alpha/beta hydrolase family	Probable esterase D14L OS=Oryza sativa subsp. japonica OX=39947 GN=D14L PE=1 SV=1	S	Function unknown	PREDICTED: probable esterase D14L [Nelumbo nucifera]
Nn1g04659	Nn1g04659	32.1887	529	31.409	494	27.8385	526	8.8397	137	9.58264	176	12.5239	224	1.08115	20	1.48146	23	2.33136	41	4.76e-13	-1.42538	down	8.87e-40	-3.73093	down	2.52e-09	2.23738	up	--	--	--	--	--	--	--	--	Protein NONRESPONDING TO OXYLIPINS 2, mitochondrial OS=Arabidopsis thaliana OX=3702 GN=NOXY2 PE=1 SV=2	S	Function unknown	PREDICTED: uncharacterized protein LOC104611682 isoform X2 [Nelumbo nucifera]
Nn1g04675	Nn1g04675	1.74527	184	1.54784	158	1.17671	142	0.543559	55	0.504762	61	0.422842	49	0.056848	7	0.091592	10	0.139013	15	8.73e-07	-1.42586	down	2.35e-17	-3.4239	down	6.03e-05	1.91061	up	--	--	Molecular Function: zinc ion binding (GO:0008270);;	K22262|3.1e-144|qsu:112034235|K22262 WD repeat and FYVE domain-containing protein 3 | (RefSeq) protein SPIRRIG	--	[R]	General function prediction only	PPR repeat family	Pentatricopeptide repeat-containing protein At3g49170, chloroplastic OS=Arabidopsis thaliana OX=3702 GN=EMB2261 PE=2 SV=1	S	Function unknown	PREDICTED: pentatricopeptide repeat-containing protein At2g33760-like [Nelumbo nucifera]
Nn1g04689	Nn1g04689	10.8362	613	12.446	682	14.2413	923	3.70681	199	5.67394	364	3.15549	194	30.8191	1852	26.8211	1464	36.6094	2115	3.6e-07	-1.42368	down	2.68e-19	1.74304	up	1.42e-28	-3.15651	down	[G]	Carbohydrate transport and metabolism	Molecular Function: UDP-glycosyltransferase activity (GO:0008194);;	K13692|8.0e-296|nnu:104590530|K13692 UDP-glucose:(indol-3-yl)acetate beta-D-glucosyltransferase [EC:2.4.1.121] | (RefSeq) UDP-glycosyltransferase 84B2-like	--	[GC]	Carbohydrate transport and metabolism;; Energy production and conversion	UDP-glucoronosyl and UDP-glucosyl transferase	UDP-glycosyltransferase 84B1 OS=Arabidopsis thaliana OX=3702 GN=UGT84B1 PE=2 SV=1	--	--	PREDICTED: UDP-glycosyltransferase 84B2-like [Nelumbo nucifera]
Nn1g04696	Nn1g04696	7.53114	300	1.73624	68	2.4169	111	1.10511	42	0.777802	36	1.05035	46	0	0	0.0508	2	0	0	0.00268602	-1.67925	down	3.12e-11	-6.56854	down	3.01e-08	4.46273	up	[G]	Carbohydrate transport and metabolism	Molecular Function: zinc ion binding (GO:0008270);; Molecular Function: oxidoreductase activity (GO:0016491);;	K00083|3.8e-207|nnu:104590534|K00083 cinnamyl-alcohol dehydrogenase [EC:1.1.1.195] | (RefSeq) cinnamyl alcohol dehydrogenase 1	Phenylpropanoid biosynthesis (ko00940)	[Q]	Secondary metabolites biosynthesis, transport and catabolism	Alcohol dehydrogenase GroES-like domain	Cinnamyl alcohol dehydrogenase 1 OS=Ocimum basilicum OX=39350 GN=CAD1 PE=1 SV=1	Q	Secondary metabolites biosynthesis, transport and catabolism	PREDICTED: cinnamyl alcohol dehydrogenase 1 [Nelumbo nucifera]
Nn1g04706	Nn1g04706	42.9302	3739	43.0686	3637	39.6778	3962	11.7686	974	4.71319	466	12.594	1194	1.24222	116	2.43205	205	3.09388	276	7.14e-09	-1.93008	down	7.19e-35	-3.76575	down	0.000304362	1.71407	up	[R]	General function prediction only	Molecular Function: protein kinase activity (GO:0004672);; Molecular Function: ATP binding (GO:0005524);; Cellular Component: integral component of membrane (GO:0016021);;	K13418|9.9e-35|ppp:112278174|K13418 somatic embryogenesis receptor kinase 1 [EC:2.7.10.1 2.7.11.1] | (RefSeq) LRR receptor kinase BAK1-like	--	--	--	Protein kinase domain	Probable LRR receptor-like serine/threonine-protein kinase At4g37250 OS=Arabidopsis thaliana OX=3702 GN=At4g37250 PE=1 SV=1	T	Signal transduction mechanisms	PREDICTED: probable LRR receptor-like serine/threonine-protein kinase At4g37250 [Nelumbo nucifera]
Nn1g04712	Nn1g04712	48.202	3192	55.6724	3277	42.7293	3242	17.8267	1066	17.0362	1306	21.9214	1416	1.25103	88	0.957312	60	2.11782	144	4.11e-22	-1.26448	down	1.68e-54	-4.58368	down	1.68e-25	3.26604	up	[CHR]	Energy production and conversion;; Coenzyme transport and metabolism;; General function prediction only	Molecular Function: phosphoglycerate dehydrogenase activity (GO:0004617);; Biological Process: L-serine biosynthetic process (GO:0006564);; Molecular Function: NAD binding (GO:0051287);;	K00058|0.0e+00|nnu:104588138|K00058 D-3-phosphoglycerate dehydrogenase / 2-oxoglutarate reductase [EC:1.1.1.95 1.1.1.399] | (RefSeq) D-3-phosphoglycerate dehydrogenase 3, chloroplastic	Glycine, serine and threonine metabolism (ko00260);; Cysteine and methionine metabolism (ko00270);; Carbon metabolism (ko01200);; Biosynthesis of amino acids (ko01230)	[E]	Amino acid transport and metabolism	D-isomer specific 2-hydroxyacid dehydrogenase, NAD binding domain	D-3-phosphoglycerate dehydrogenase 1, chloroplastic OS=Arabidopsis thaliana OX=3702 GN=PGDH1 PE=1 SV=1	E	Amino acid transport and metabolism	PREDICTED: D-3-phosphoglycerate dehydrogenase 3, chloroplastic [Nelumbo nucifera]
Nn1g04828	Nn1g04828	6.74994	372	4.90847	271	6.82573	466	2.3404	123	1.75434	105	3.14873	199	0.086315	7	0.061849	5	0.179642	11	6.44e-05	-1.23006	down	1.69e-37	-5.04785	down	8.35e-14	3.6416	up	--	--	Molecular Function: transcription factor activity, sequence-specific DNA binding (GO:0003700);; Cellular Component: nucleus (GO:0005634);; Cellular Component: host cell nucleus (GO:0042025);; Molecular Function: sequence-specific DNA binding (GO:0043565);;	K09419|1.1e-157|nnu:104601761|K09419 heat shock transcription factor, other eukaryote | (RefSeq) heat stress transcription factor B-4-like	--	[K]	Transcription	--	Heat stress transcription factor B-4 OS=Arabidopsis thaliana OX=3702 GN=HSFB4 PE=2 SV=1	K	Transcription	PREDICTED: heat stress transcription factor B-4-like [Nelumbo nucifera]
Nn1g04838	Nn1g04838	129.497	8998	121.751	8155	126.325	10107	44.7616	2977	53.3925	4159	52.7762	4036	5.62867	428	7.46345	499	5.87394	413	1.11e-28	-1.18912	down	5.84e-157	-3.87536	down	1.23e-50	2.66139	up	--	--	--	--	--	--	--	Remorin, C-terminal region	--	S	Function unknown	PREDICTED: uncharacterized protein LOC104601770 isoform X1 [Nelumbo nucifera]
Nn1g04847	Nn1g04847	13.7733	499	11.695	411	13.8084	573	2.17621	76	3.8775	160	2.11	84	0.101886	4	0.16335	6	0	0	5.34e-13	-2.07107	down	9.82e-43	-6.59032	down	3.53e-10	4.10556	up	--	--	--	--	--	--	--	--	--	S	Function unknown	PREDICTED: uncharacterized protein LOC104601778 isoform X2 [Nelumbo nucifera]
Nn1g04853	Nn1g04853	18.154	1181	34.4734	2187	32.4636	2424	61.5926	3835	69.8134	5180	69.3853	4934	6.24141	421	4.93283	310	1.72943	116	8.81e-07	1.33219	up	6.48e-06	-2.25193	down	1.88e-15	3.49619	up	[C]	Energy production and conversion	Molecular Function: oxidoreductase activity (GO:0016491);; Molecular Function: heme binding (GO:0020037);; Molecular Function: iron-sulfur cluster binding (GO:0051536);;	K00366|0.0e+00|nnu:104601782|K00366 ferredoxin-nitrite reductase [EC:1.7.7.1] | (RefSeq) ferredoxin--nitrite reductase, chloroplastic	Nitrogen metabolism (ko00910)	[P]	Inorganic ion transport and metabolism	Nitrite and sulphite reductase 4Fe-4S domain	Ferredoxin--nitrite reductase, chloroplastic OS=Betula pendula OX=3505 GN=NIR1 PE=2 SV=1	P	Inorganic ion transport and metabolism	PREDICTED: ferredoxin--nitrite reductase, chloroplastic [Nelumbo nucifera]
Nn1g04901	Nn1g04901	6.46009	818	6.89351	790	5.84479	872	1.69906	226	2.73671	431	2.31166	307	0.737142	93	0.883968	73	0.822137	118	6.47e-09	-1.26527	down	3.41e-43	-2.66943	down	1.26e-05	1.35845	up	[F]	Nucleotide transport and metabolism	Molecular Function: dihydrofolate reductase activity (GO:0004146);; Molecular Function: thymidylate synthase activity (GO:0004799);; Biological Process: dTMP biosynthetic process (GO:0006231);; Biological Process: one-carbon metabolic process (GO:0006730);; Biological Process: methylation (GO:0032259);; Biological Process: tetrahydrofolate biosynthetic process (GO:0046654);;	K13998|2.2e-219|nnu:104595633|K13998 dihydrofolate reductase / thymidylate synthase [EC:1.5.1.3 2.1.1.45] | (RefSeq) putative bifunctional dihydrofolate reductase-thymidylate synthase	Pyrimidine metabolism (ko00240);; One carbon pool by folate (ko00670);; Folate biosynthesis (ko00790)	[F]	Nucleotide transport and metabolism	Thymidylate synthase	Bifunctional dihydrofolate reductase-thymidylate synthase OS=Glycine max OX=3847 PE=1 SV=1	H	Coenzyme transport and metabolism	PREDICTED: putative bifunctional dihydrofolate reductase-thymidylate synthase isoform X2 [Nelumbo nucifera]
Nn1g04911	Nn1g04911	2.51012	135	3.10258	162	2.66465	164	0.372702	19	0.560506	35	0.33361	20	1.09231	63	1.12781	59	0.670914	37	2.62e-13	-2.47014	down	0.00121932	-1.06765	down	0.00243801	-1.41987	down	[QV]	Secondary metabolites biosynthesis, transport and catabolism;; Defense mechanisms	Molecular Function: monooxygenase activity (GO:0004497);; Molecular Function: iron ion binding (GO:0005506);; Cellular Component: integral component of membrane (GO:0016021);; Molecular Function: oxidoreductase activity, acting on paired donors, with incorporation or reduction of molecular oxygen (GO:0016705);; Molecular Function: heme binding (GO:0020037);;	K07437|2.3e-130|csv:101209645|K07437 cytochrome P450 family 26 subfamily A | (RefSeq) abscisic acid 8'-hydroxylase 3	--	[QI]	Secondary metabolites biosynthesis, transport and catabolism;; Lipid transport and metabolism	Cytochrome P450	Abscisic acid 8'-hydroxylase 4 OS=Arabidopsis thaliana OX=3702 GN=CYP707A4 PE=2 SV=2	Q	Secondary metabolites biosynthesis, transport and catabolism	PREDICTED: abscisic acid 8'-hydroxylase 3 [Nelumbo nucifera]
Nn1g04982	Nn1g04982	12.8369	954	11.8315	865	11.6397	1003	22.4904	1648	35.6356	3054	20.5396	1740	51.8086	4253	71.2398	5212	57.4584	4456	9.98e-08	1.25763	up	2.36e-71	2.75696	up	1.19e-07	-1.47193	down	[D]	Cell cycle control, cell division, chromosome partitioning	Molecular Function: metal ion binding (GO:0046872);;	K01081|2.4e-124|ota:OT_ostta11g02900|K01081 5'-nucleotidase [EC:3.1.3.5] | (RefSeq) HAD-superfamily hydrolase, subfamily IG,5'-nucleotidase	Purine metabolism (ko00230);; Pyrimidine metabolism (ko00240);; Nicotinate and nicotinamide metabolism (ko00760)	[F]	Nucleotide transport and metabolism	5' nucleotidase family	--	F	Nucleotide transport and metabolism	PREDICTED: cytosolic purine 5'-nucleotidase-like isoform X3 [Nelumbo nucifera]
Nn1g05003	Nn1g05003	7.8902	526	5.97874	402	9.59499	739	670.622	40322	594.405	44684	395.396	27276	3950.41	274426	3400.35	218781	1602.9	108507	1.02e-135	6.0936	up	1.94e-126	8.86543	up	1.73e-11	-2.68896	down	[I]	Lipid transport and metabolism	Molecular Function: iron ion binding (GO:0005506);; Biological Process: lipid biosynthetic process (GO:0008610);; Cellular Component: integral component of membrane (GO:0016021);; Molecular Function: oxidoreductase activity (GO:0016491);;	K15404|0.0e+00|nnu:104596254|K15404 aldehyde decarbonylase [EC:4.1.99.5] | (RefSeq) protein ECERIFERUM 1-like	Cutin, suberine and wax biosynthesis (ko00073)	--	--	WAX2 C-terminal domain	Very-long-chain aldehyde decarbonylase CER1 OS=Arabidopsis thaliana OX=3702 GN=CER1 PE=1 SV=1	S	Function unknown	PREDICTED: protein ECERIFERUM 1-like [Nelumbo nucifera]
Nn1g05024	Nn1g05024	44.7045	3759	37.4619	3054	35.0747	3382	2.42805	194	1.90158	182	2.88443	264	1.04581	94	0.46971	39	0.506555	44	3.21e-102	-3.85893	down	1.63e-56	-5.33894	down	0.000946089	1.43461	up	[S]	Function unknown	Molecular Function: helicase activity (GO:0004386);; Molecular Function: ATP binding (GO:0005524);;	K19001|0.0e+00|nnu:104601884|K19001 ATP-dependent DNA helicase | (RefSeq) ATP-dependent DNA helicase DDM1	--	[K]	Transcription	SNF2 family N-terminal domain	ATP-dependent DNA helicase DDM1 OS=Arabidopsis thaliana OX=3702 GN=DDM1 PE=1 SV=1	K	Transcription	PREDICTED: ATP-dependent DNA helicase DDM1 [Nelumbo nucifera]
Nn1g05029	Nn1g05029	7.30126	412	8.284	449	5.87445	380	2.60587	138	3.56101	231	2.78271	172	0.023083	2	0	0	0.023433	2	6.87e-06	-1.10481	down	1.25e-28	-7.45664	down	6.94e-22	5.96191	up	--	--	Cellular Component: integral component of membrane (GO:0016021);;	--	--	--	--	Sulfite exporter TauE/SafE	Sulfite exporter TauE/SafE family protein 3 OS=Arabidopsis thaliana OX=3702 GN=At2g25737 PE=2 SV=1	S	Function unknown	PREDICTED: uncharacterized protein LOC104601887 [Nelumbo nucifera]
Nn1g05064	Nn1g05064	6.7926	211	6.96373	207	5.57798	199	2.79376	86	2.44579	87	2.25166	77	0.823639	28	0.815119	27	0.302869	11	6.73e-07	-1.1868	down	7.09e-12	-2.72617	down	0.00178997	1.48068	up	--	--	Molecular Function: voltage-gated cation channel activity (GO:0022843);; Biological Process: regulation of ion transmembrane transport (GO:0034765);;	--	--	--	--	--	Outer envelope pore protein 24, chloroplastic OS=Pisum sativum OX=3888 GN=OEP24 PE=1 SV=1	S	Function unknown	PREDICTED: outer envelope pore protein 24A, chloroplastic-like [Nelumbo nucifera]
Nn1g05087	Nn1g05087	4.69905	229	5.01285	226	6.11129	292	13.4975	565	11.221	554	10.3653	520	15.9339	726	17.6204	758	24.2803	1112	6.65e-13	1.23572	up	4.28e-26	2.24156	up	2.99e-05	-1.00244	down	[C]	Energy production and conversion	Molecular Function: NAD(P)H dehydrogenase (quinone) activity (GO:0003955);; Molecular Function: FMN binding (GO:0010181);;	K03809|4.4e-95|nnu:104588185|K03809 NAD(P)H dehydrogenase (quinone) [EC:1.6.5.2] | (RefSeq) probable NAD(P)H dehydrogenase (quinone) FQR1-like 2	Ubiquinone and other terpenoid-quinone biosynthesis (ko00130)	[R]	General function prediction only	NADPH-dependent FMN reductase	Probable NAD(P)H dehydrogenase (quinone) FQR1-like 2 OS=Arabidopsis thaliana OX=3702 GN=At4g36750 PE=1 SV=1	S	Function unknown	PREDICTED: probable NAD(P)H dehydrogenase (quinone) FQR1-like 2 [Nelumbo nucifera]
Nn1g05094	Nn1g05094	1.52804	75	1.49377	62	1.45141	98	3.26953	168	3.29825	183	2.8479	166	13.0766	696	9.65435	473	10.6284	571	2.34e-07	1.23182	up	2.06e-47	3.33478	up	7.17e-22	-2.08831	down	--	--	Molecular Function: ATP binding (GO:0005524);; Molecular Function: transferase activity (GO:0016740);;	K10576|1.0e-16|nnu:104590878|K10576 ubiquitin-conjugating enzyme E2 H [EC:2.3.2.23] | (RefSeq) ubiquitin-conjugating enzyme E2 4-like	Ubiquitin mediated proteolysis (ko04120)	[O]	Posttranslational modification, protein turnover, chaperones	--	Ubiquitin-conjugating enzyme E2 4 OS=Arabidopsis thaliana OX=3702 GN=UBC4 PE=2 SV=2	O	Posttranslational modification, protein turnover, chaperones	PREDICTED: ubiquitin-conjugating enzyme E2 4-like [Nelumbo nucifera]
Nn1g05162	Nn1g05162	0.102351	8	0.098764	11	0.069954	10	0.436284	47	0.544766	70	0.387518	48	1.10547	99	2.14132	233	0.974904	107	1.3e-07	2.43826	up	1.33e-15	4.27077	up	0.000263007	-1.71678	down	--	--	Biological Process: negative regulation of transcription, DNA-templated (GO:0045892);;	K03260|2.0e-07|lja:Lj4g3v1989860.1|K03260 translation initiation factor 4G | (RefSeq) Lj4g3v1989860.1; -	RNA transport (ko03013)	[T]	Signal transduction mechanisms	MA3 domain	MA3 DOMAIN-CONTAINING TRANSLATION REGULATORY FACTOR 2 OS=Arabidopsis thaliana OX=3702 GN=MRF2 PE=1 SV=1	T	Signal transduction mechanisms	PREDICTED: uncharacterized protein LOC104587437 [Nelumbo nucifera]
Nn1g05166	Nn1g05166	5.17244	750	4.45819	624	4.58929	762	0.863184	118	0.531773	89	1.06332	163	0	0	0.000452	1	0	0	6.28e-22	-2.38102	down	2.32e-25	-9.37494	down	1.44e-15	6.24552	up	[M]	Cell wall/membrane/envelope biogenesis	Molecular Function: protein kinase activity (GO:0004672);; Molecular Function: ATP binding (GO:0005524);; Cellular Component: integral component of membrane (GO:0016021);;	K13415|3.8e-51|pda:103696970|K13415 protein brassinosteroid insensitive 1 [EC:2.7.10.1 2.7.11.1] | (RefSeq) brassinosteroid LRR receptor kinase BRI1-like	Plant hormone signal transduction (ko04075)	--	--	Leucine rich repeat	Probable LRR receptor-like serine/threonine-protein kinase At4g36180 OS=Arabidopsis thaliana OX=3702 GN=At4g36180 PE=1 SV=1	T	Signal transduction mechanisms	PREDICTED: probable LRR receptor-like serine/threonine-protein kinase At4g36180 [Nelumbo nucifera]
Nn1g05175	Nn1g05175	17.5715	1310	13.4449	995	12.4965	1021	21.1197	1504	54.0904	4655	20.8497	1684	136.404	10834	151.396	10799	48.0724	3765	0.00186897	1.24643	up	3.79e-15	3.34348	up	0.000278046	-1.97566	down	[R]	General function prediction only	Molecular Function: ATP binding (GO:0005524);; Molecular Function: ATPase activity (GO:0016887);;	K06185|2.9e-65|ini:109183306|K06185 ATP-binding cassette, subfamily F, member 2 | (RefSeq) ABC transporter F family member 1-like	--	[R]	General function prediction only	ABC transporter	ABC transporter F family member 5 OS=Arabidopsis thaliana OX=3702 GN=ABCF5 PE=2 SV=1	S	Function unknown	PREDICTED: ABC transporter F family member 5-like [Nelumbo nucifera]
Nn1g05187	Nn1g05187	39.0752	2549	23.7385	1509	24.5942	1826	6.20572	382	1.97152	148	7.22575	518	0.02042	2	0	0	0	0	8.81e-08	-2.25335	down	5.15e-39	-10.2179	down	1.19e-20	7.00188	up	--	--	Molecular Function: monooxygenase activity (GO:0004497);; Molecular Function: iron ion binding (GO:0005506);; Cellular Component: integral component of membrane (GO:0016021);; Molecular Function: oxidoreductase activity, acting on paired donors, with incorporation or reduction of molecular oxygen (GO:0016705);; Molecular Function: heme binding (GO:0020037);;	K20619|1.2e-186|nnu:104589294|K20619 cytochrome P450 family 78 subfamily A | (RefSeq) cytochrome P450 78A7-like	--	[Q]	Secondary metabolites biosynthesis, transport and catabolism	Cytochrome P450	Cytochrome P450 78A7 OS=Arabidopsis thaliana OX=3702 GN=CYP78A7 PE=2 SV=1	Q	Secondary metabolites biosynthesis, transport and catabolism	PREDICTED: cytochrome P450 78A7-like [Nelumbo nucifera]
Nn1g05192	Nn1g05192	21.9254	260	23.8583	274	13.9841	190	4.41977	50	3.92951	53	4.94802	64	0	0	0.060867	1	0	0	1.04e-10	-1.98463	down	3.06e-16	-7.89959	down	1.05e-10	5.28435	up	--	--	Biological Process: innate immune response (GO:0045087);;	--	--	--	--	Elicitor peptide 1-7	--	--	--	--
Nn1g05260	Nn1g05260	5.40725	130	5.94766	136	5.62583	154	20.6293	470	18.8192	512	22.3351	582	1.33106	34	1.26527	30	0.900357	22	2.35e-34	1.98086	up	1.92e-09	-1.81409	down	6.27e-48	3.75786	up	[O]	Posttranslational modification, protein turnover, chaperones	Molecular Function: peptidyl-prolyl cis-trans isomerase activity (GO:0003755);;	K01802|1.8e-119|nnu:104605912|K01802 peptidylprolyl isomerase [EC:5.2.1.8] | (RefSeq) photosynthetic NDH subunit of lumenal location 4, chloroplastic-like	--	--	--	FKBP-type peptidyl-prolyl cis-trans isomerase	Photosynthetic NDH subunit of lumenal location 4, chloroplastic OS=Arabidopsis thaliana OX=3702 GN=PNSL4 PE=1 SV=1	O	Posttranslational modification, protein turnover, chaperones	PREDICTED: photosynthetic NDH subunit of lumenal location 4, chloroplastic-like [Nelumbo nucifera]
Nn1g05272	Nn1g05272	8.6422	534	14.9704	902	12.6753	897	2.38142	142	0.752689	55	2.27798	154	4.39155	281	4.56282	279	2.82198	183	2.68e-09	-2.4863	down	0.000349833	-1.18115	down	0.00534236	-1.35902	down	[P]	Inorganic ion transport and metabolism	Molecular Function: secondary active sulfate transmembrane transporter activity (GO:0008271);; Cellular Component: integral component of membrane (GO:0016021);;	K17470|5.8e-161|nnu:104600090|K17470 sulfate transporter 1, high-affinity | (RefSeq) sulfate transporter 1.3-like	--	[P]	Inorganic ion transport and metabolism	Sulfate permease family	Sulfate transporter 1.2 OS=Arabidopsis thaliana OX=3702 GN=SULTR1;2 PE=1 SV=1	P	Inorganic ion transport and metabolism	PREDICTED: sulfate transporter 1.3-like [Nelumbo nucifera]
Nn1g05320	Nn1g05320	0.848936	33	1.88286	71	0.918765	41	5.15975	190	13.5689	595	4.2784	180	21.6521	889	23.0468	859	31.6952	1251	1.12e-06	2.55264	up	5.34e-41	4.73634	up	4.31e-05	-1.93086	down	--	--	Molecular Function: protein binding (GO:0005515);; Cellular Component: cellular_component (GO:0005575);; Cellular Component: cell-cell junction (GO:0005911);; Biological Process: transport (GO:0006810);; Biological Process: cell communication (GO:0007154);; Biological Process: signal transduction (GO:0007165);; Biological Process: biological_process (GO:0008150);; Cellular Component: plasmodesma …	--	--	--	--	F-box-like	F-box protein At1g22220 OS=Arabidopsis thaliana OX=3702 GN=At1g22220 PE=2 SV=1	S	Function unknown	PREDICTED: F-box protein At1g22220-like [Nelumbo nucifera]
Nn1g05351	Nn1g05351	19.3961	611	24.8554	744	22.0522	785	101.05	3016	89.7527	3241	92.0161	3197	29.635	999	48.8043	1531	31.3898	1031	5.5e-54	2.22889	up	7.86e-06	1.18974	up	7.42e-05	1.02268	up	--	--	--	--	--	--	--	--	--	--	--	PREDICTED: uncharacterized protein LOC104605984 [Nelumbo nucifera]
Nn1g05358	Nn1g05358	1.3409	17	1.60478	20	0.826134	12	28.378	333	24.0389	337	8.06062	109	147.803	1941	151.219	1803	105.348	1330	1.42e-13	3.76998	up	2.62e-103	7.07083	up	2.01e-10	-2.90926	down	--	--	Cellular Component: signal peptidase complex (GO:0005787);; Biological Process: signal peptide processing (GO:0006465);; Molecular Function: peptidase activity (GO:0008233);; Cellular Component: integral component of membrane (GO:0016021);; Biological Process: anther wall tapetum development (GO:0048658);;	--	--	--	--	Microsomal signal peptidase 12 kDa subunit (SPC12)	Signal peptidase complex-like protein DTM1 OS=Oryza sativa subsp. japonica OX=39947 GN=DTM1 PE=2 SV=1	S	Function unknown	PREDICTED: signal peptidase complex-like protein DTM1 isoform X2 [Nelumbo nucifera]
Nn1g05380	Nn1g05380	2.62279	117	2.02225	87	2.47879	126	7.48352	312	9.41188	468	2.95937	141	43.1656	2002	51.2171	2154	36.3952	1624	0.000527414	1.51191	up	1.52e-101	4.58044	up	1.03e-11	-2.89748	down	--	--	Cellular Component: integral component of membrane (GO:0016021);;	--	--	--	--	--	--	--	--	PREDICTED: uncharacterized protein LOC104606004 [Nelumbo nucifera]
Nn1g05389	Nn1g05389	3.69416	246	4.34849	265	4.08436	305	7.55711	495	6.02475	423	9.12206	648	0.096625	7	0.106231	9	0.977197	61	6.09e-06	1.02956	up	9.68e-05	-2.8384	down	1.42e-07	3.57665	up	[J]	Translation, ribosomal structure and biogenesis	Molecular Function: mRNA binding (GO:0003729);;	K12741|3.6e-19|smo:SELMODRAFT_169811|K12741 heterogeneous nuclear ribonucleoprotein A1/A3 | (RefSeq) hypothetical protein	Spliceosome (ko03040)	[R]	General function prediction only	RNA recognition motif. (a.k.a. RRM, RBD, or RNP domain)	Probable RNA-binding protein ARP1 OS=Arabidopsis thaliana OX=3702 GN=ARP1 PE=2 SV=1	A	RNA processing and modification	PREDICTED: RNA-binding protein 38-like isoform X1 [Nelumbo nucifera]
Nn1g05503	Nn1g05503	12.6227	1026	11.1502	873	12.2777	1136	3.48649	265	4.52399	419	4.53423	396	1.10163	95	2.40152	187	1.44146	116	1.01e-17	-1.38785	down	1.13e-15	-2.43702	down	0.0049211	1.02196	up	--	--	--	K13171|1.9e-14|nnu:104601100|K13171 serine/arginine repetitive matrix protein 1 | (RefSeq) serine/arginine repetitive matrix protein 1-like	RNA transport (ko03013);; mRNA surveillance pathway (ko03015)	--	--	--	--	--	--	PREDICTED: uncharacterized protein LOC104608611 [Nelumbo nucifera]
Nn1g05509	Nn1g05509	11.8274	474	10.0241	390	16.1083	740	2.20302	84	1.93825	89	3.07035	134	0.143117	7	0	0	0.088411	4	9.43e-16	-2.21876	down	2.1e-35	-6.53195	down	4.37e-11	4.03323	up	--	--	Cellular Component: host cell nucleus (GO:0042025);;	K18810|8.7e-204|nnu:104608606|K18810 cyclin D1/2/4, plant | (RefSeq) cyclin-D3-1-like	--	[D]	Cell cycle control, cell division, chromosome partitioning	Cyclin, N-terminal domain	Cyclin-D3-1 OS=Oryza sativa subsp. japonica OX=39947 GN=CYCD3-1 PE=2 SV=2	D	Cell cycle control, cell division, chromosome partitioning	PREDICTED: cyclin-D3-1-like [Nelumbo nucifera]
Nn1g05511	Nn1g05511	1.67118	120	1.68159	117	1.3988	115	0.453057	31	0.795733	65	0.64394	51	0.106963	9	0.082996	6	0.089355	7	0.000549204	-1.14929	down	4.64e-17	-3.49375	down	3.66e-05	2.20699	up	--	--	--	K22651|4.5e-110|mdm:103443441|K22651 E3 ubiquitin-protein ligase RNF4 [EC:2.3.2.27] | (RefSeq) LOW QUALITY PROTEIN: pentatricopeptide repeat-containing protein At1g50270-like	--	[R]	General function prediction only	PPR repeat family	Pentatricopeptide repeat-containing protein At2g22410, mitochondrial OS=Arabidopsis thaliana OX=3702 GN=PCMP-E28 PE=2 SV=1	K	Transcription	PREDICTED: pentatricopeptide repeat-containing protein At2g22410, mitochondrial-like [Nelumbo nucifera]
Nn1g05538	Nn1g05538	118.581	6908	130.743	7388	95.5394	6397	4.73762	261	7.88697	519	8.01759	506	0.054206	4	0.05242	3	0	0	2.16e-60	-3.87995	down	3.19e-93	-10.7607	down	3.41e-32	6.5351	up	--	--	Molecular Function: aspartic-type endopeptidase activity (GO:0004190);;	K22683|1.1e-28|mus:103983456|K22683 aspartyl protease family protein [EC:3.4.23.-] | (RefSeq) protein ASPARTIC PROTEASE IN GUARD CELL 1-like	--	[O]	Posttranslational modification, protein turnover, chaperones	Xylanase inhibitor C-terminal	Aspartyl protease AED3 OS=Arabidopsis thaliana OX=3702 GN=AED3 PE=1 SV=1	O	Posttranslational modification, protein turnover, chaperones	PREDICTED: aspartyl protease AED3-like [Nelumbo nucifera]
Nn1g05541	Nn1g05541	22.3089	698	34.6544	1046	26.3334	951	7.3567	217	9.97055	348	8.32614	286	3.96856	130	2.20382	65	2.6861	86	1.9e-10	-1.56005	down	1.02e-17	-2.79339	down	0.000405217	1.19596	up	--	--	Molecular Function: AT DNA binding (GO:0003680);; Molecular Function: transcription factor activity, sequence-specific DNA binding (GO:0003700);; Cellular Component: nucleus (GO:0005634);;	--	--	--	--	Plants and Prokaryotes Conserved (PCC) domain	AT-hook motif nuclear-localized protein 17 OS=Arabidopsis thaliana OX=3702 GN=AHL17 PE=2 SV=1	K	Transcription	PREDICTED: AT-hook motif nuclear-localized protein 17-like [Nelumbo nucifera]
Nn1g05573	Nn1g05573	7.12627	1198	7.81041	1273	5.77331	1113	0.507393	82	0.400032	77	0.553668	102	0.164	30	0.071913	12	0.177184	31	2.45e-68	-3.64372	down	3.28e-58	-5.13368	down	0.00170271	1.42342	up	--	--	Molecular Function: microtubule motor activity (GO:0003777);; Molecular Function: ATP binding (GO:0005524);; Biological Process: microtubule-based movement (GO:0007018);; Molecular Function: microtubule binding (GO:0008017);;	K18806|1.8e-89|mis:MICPUN_63076|K18806 kinesin family member 7 | (RefSeq) predicted protein	--	[Z]	Cytoskeleton	Kinesin motor domain	Kinesin-like protein KIN-4C OS=Arabidopsis thaliana OX=3702 GN=KIN4C PE=2 SV=2	Z	Cytoskeleton	PREDICTED: kinesin-like protein KIN-4C isoform X1 [Nelumbo nucifera]
Nn1g05592	Nn1g05592	6.68183	462	6.51272	437	6.54203	519	2.08358	137	1.44041	113	2.71125	204	0.178368	14	0.106548	8	0.121973	9	3.25e-09	-1.51355	down	1.6e-58	-5.01277	down	8.7e-14	3.34828	up	--	--	Biological Process: response to hypoxia (GO:0001666);; Cellular Component: cellular_component (GO:0005575);; Cellular Component: intracellular (GO:0005622);; Cellular Component: cell (GO:0005623);; Cellular Component: nucleus (GO:0005634);; Cellular Component: nucleoplasm (GO:0005654);; Cellular Component: chromatin silencing complex (GO:0005677);; Biological Process: response to stress (GO:00069…	--	--	--	--	PHD - plant homeodomain finger protein	VIN3-like protein 2 OS=Arabidopsis thaliana OX=3702 GN=VIL2 PE=1 SV=1	S	Function unknown	PREDICTED: VIN3-like protein 2 [Nelumbo nucifera]
Nn1g05607	Nn1g05607	1.25242	22	0.830154	14	1.18714	23	3.45355	56	3.2843	58	1.71157	34	10.6549	173	6.06227	87	8.17157	135	0.00403262	1.36341	up	1.13e-15	3.15436	up	3.73e-05	-1.70005	down	--	--	Molecular Function: UDP-glycosyltransferase activity (GO:0008194);; Cellular Component: integral component of membrane (GO:0016021);;	--	--	--	--	--	--	--	--	PREDICTED: UDP-glycosyltransferase 91C1-like [Nelumbo nucifera]
Nn1g05682	Nn1g05682	2.68832	217	2.59159	209	2.39167	232	4.86813	412	7.11242	642	3.74847	328	16.5675	1462	20.2043	1644	14.8111	1243	5.38e-05	1.14002	up	1.65e-60	3.1746	up	4.81e-11	-1.99052	down	--	--	Molecular Function: protein binding (GO:0005515);;	K03122|4.3e-09|mdm:114825099|K03122 transcription initiation factor TFIIA large subunit | (RefSeq) uncharacterized protein LOC114825099	Basal transcription factors (ko03022)	--	--	PB1 domain	--	S	Function unknown	PREDICTED: uncharacterized protein LOC104588442 [Nelumbo nucifera]
Nn1g05765	Nn1g05765	10.2263	389	6.81446	252	7.40969	324	1.29814	47	1.19535	52	1.8989	79	0	0	0	0	0	0	3.81e-16	-2.28898	down	3.04e-15	-9.05756	down	9.26e-11	5.796	up	--	--	Molecular Function: protein dimerization activity (GO:0046983);;	K16190|6.1e-13|bdi:100843665|K16190 glucuronokinase [EC:2.7.1.43] | (RefSeq) transcription factor TDR	Pentose and glucuronate interconversions (ko00040);; Ascorbate and aldarate metabolism (ko00053);; Amino sugar and nucleotide sugar metabolism (ko00520)	--	--	Helix-loop-helix DNA-binding domain	Transcription factor bHLH93 OS=Arabidopsis thaliana OX=3702 GN=BHLH93 PE=1 SV=1	K	Transcription	PREDICTED: transcription factor bHLH93-like [Nelumbo nucifera]
Nn1g05779	Nn1g05779	125.691	3261	145.748	3590	146.502	4335	54.1233	1384	57.1841	1701	58.2578	1708	19.4517	510	23.1279	590	16.1218	463	7.29e-20	-1.1196	down	4.41e-38	-2.36762	down	1.53e-11	1.23328	up	[G]	Carbohydrate transport and metabolism	Molecular Function: monooxygenase activity (GO:0004497);; Cellular Component: plastid (GO:0009536);; Biological Process: photorespiration (GO:0009853);; Biological Process: carbon fixation (GO:0015977);; Biological Process: photosynthesis (GO:0015979);; Molecular Function: ribulose-bisphosphate carboxylase activity (GO:0016984);;	K01602|7.2e-49|nnu:104610551|K01602 ribulose-bisphosphate carboxylase small chain [EC:4.1.1.39] | (RefSeq) ribulose bisphosphate carboxylase small chain clone 512-like	Glyoxylate and dicarboxylate metabolism (ko00630);; Carbon fixation in photosynthetic organisms (ko00710);; Carbon metabolism (ko01200)	--	--	Ribulose bisphosphate carboxylase, small chain	Ribulose bisphosphate carboxylase small chain, chloroplastic OS=Trifolium repens OX=3899 GN=RBCS PE=3 SV=1	E	Amino acid transport and metabolism	PREDICTED: ribulose bisphosphate carboxylase small chain clone 512-like [Nelumbo nucifera]
Nn1g05790	Nn1g05790	0.961056	38	0.423825	17	0.613474	29	12.2933	453	11.123	487	10.0777	431	3.29075	136	2.62133	98	4.10834	164	4.19e-50	4.05001	up	1.07e-12	2.66468	up	8.47e-09	1.41243	up	[HR]	Coenzyme transport and metabolism;; General function prediction only	Molecular Function: hydrolase activity (GO:0016787);;	K08726|4.8e-105|sbi:8071538|K08726 soluble epoxide hydrolase / lipid-phosphate phosphatase [EC:3.3.2.10 3.1.3.76] | (RefSeq) uncharacterized protein LOC8071538	Arachidonic acid metabolism (ko00590);; Peroxisome (ko04146)	[I]	Lipid transport and metabolism	alpha/beta hydrolase fold	--	I	Lipid transport and metabolism	PREDICTED: bifunctional epoxide hydrolase 2 [Nelumbo nucifera]
Nn1g05806	Nn1g05806	7.73398	266	8.58672	274	7.9878	308	25.2468	781	13.2245	512	18.1544	668	64.5845	2125	45.8586	1386	40.3022	1326	2.82e-07	1.30602	up	1.63e-34	2.95151	up	6.74e-07	-1.60935	down	--	--	Cellular Component: integral component of membrane (GO:0016021);;	--	--	[S]	Function unknown	TLC domain	--	S	Function unknown	PREDICTED: transmembrane protein 136 [Nelumbo nucifera]
Nn1g05881	Nn1g05881	4.35558	149	4.39635	146	3.3603	132	13.8678	450	18.348	712	13.4349	500	0	0	0	0	0	0	6.64e-19	2.01262	up	2.12e-11	-8.0539	down	4.15e-30	8.62624	up	[G]	Carbohydrate transport and metabolism	Molecular Function: channel activity (GO:0015267);; Cellular Component: integral component of membrane (GO:0016021);;	K09866|1.6e-118|pavi:110757247|K09866 aquaporin-4 | (RefSeq) aquaporin-like	--	[G]	Carbohydrate transport and metabolism	Major intrinsic protein	Probable aquaporin PIP2-6 OS=Oryza sativa subsp. japonica OX=39947 GN=PIP2-6 PE=2 SV=2	G	Carbohydrate transport and metabolism	PREDICTED: aquaporin-like [Nelumbo nucifera]
Nn1g05894	Nn1g05894	27.9908	1018	19.7563	735	25.1408	1015	5.25024	195	7.57842	328	4.96918	208	0	0	0	0	0	0	6.14e-16	-1.79837	down	7.25e-22	-10.4039	down	3.33e-21	7.57117	up	[Q]	Secondary metabolites biosynthesis, transport and catabolism	Molecular Function: metal ion binding (GO:0046872);; Molecular Function: dioxygenase activity (GO:0051213);;	K00475|2.1e-213|nnu:104605566|K00475 naringenin 3-dioxygenase [EC:1.14.11.9] | (RefSeq) naringenin,2-oxoglutarate 3-dioxygenase-like	Flavonoid biosynthesis (ko00941)	[QR]	Secondary metabolites biosynthesis, transport and catabolism;; General function prediction only	2OG-Fe(II) oxygenase superfamily	Naringenin,2-oxoglutarate 3-dioxygenase (Fragment) OS=Petunia hybrida OX=4102 GN=AN3 PE=1 SV=1	Q	Secondary metabolites biosynthesis, transport and catabolism	PREDICTED: naringenin,2-oxoglutarate 3-dioxygenase-like [Nelumbo nucifera]
Nn1g05913	Nn1g05913	1.17166	117	1.09171	106	0.963658	110	0.381486	36	0.39659	45	0.383046	42	0.112761	12	0.041666	4	0.104613	11	3.17e-06	-1.31461	down	4.29e-13	-3.125	down	0.00155461	1.71368	up	--	--	--	K22565|1.0e-56|rcu:8269241|K22565 COMM domain containing 9 | (RefSeq) pentatricopeptide repeat-containing protein At5g50390, chloroplastic	--	[R]	General function prediction only	PPR repeat	Putative pentatricopeptide repeat-containing protein At3g23330 OS=Arabidopsis thaliana OX=3702 GN=PCMP-H32 PE=3 SV=1	S	Function unknown	PREDICTED: putative pentatricopeptide repeat-containing protein At1g68930 [Nelumbo nucifera]
Nn1g05916	Nn1g05916	0.173516	9	0.09115	4	0.038373	4	0.804987	42	1.49904	95	0.772373	45	2.16149	129	2.49077	133	1.62052	91	8.48e-08	3.13106	up	1.39e-21	4.72359	up	0.00242148	-1.29708	down	[J]	Translation, ribosomal structure and biogenesis	Molecular Function: molecular_function (GO:0003674);; Molecular Function: catalytic activity (GO:0003824);; Molecular Function: hydrolase activity (GO:0016787);; Molecular Function: hydrolase activity, acting on carbon-nitrogen (but not peptide) bonds (GO:0016810);; Molecular Function: hydrolase activity, acting on carbon-nitrogen (but not peptide) bonds, in linear amides (GO:0016811);;	K01426|4.6e-294|nnu:104605553|K01426 amidase [EC:3.5.1.4] | (RefSeq) putative amidase C869.01	Arginine and proline metabolism (ko00330);; Phenylalanine metabolism (ko00360);; Tryptophan metabolism (ko00380)	[J]	Translation, ribosomal structure and biogenesis	Amidase	Probable amidase At4g34880 OS=Arabidopsis thaliana OX=3702 GN=At4g34880 PE=2 SV=1	J	Translation, ribosomal structure and biogenesis	PREDICTED: putative amidase C869.01 [Nelumbo nucifera]
Nn1g05934	Nn1g05934	76.5574	4813	74.1553	4572	67.2024	5012	148.079	9124	153.212	11561	97.0902	7229	196.981	13640	242.778	15209	297.365	19942	1.21e-07	1.04448	up	3.87e-39	2.20371	up	8.93e-06	-1.1485	down	--	--	Cellular Component: integral component of membrane (GO:0016021);;	K12173|9.4e-58|gmx:100794341|K12173 BRCA1-A complex subunit BRE | (RefSeq) BRISC and BRCA1-A complex member 2	Homologous recombination (ko03440)	--	--	Thaumatin family	PR5-like receptor kinase OS=Arabidopsis thaliana OX=3702 GN=PR5K PE=1 SV=1	S	Function unknown	PREDICTED: thaumatin-like protein 1 [Nelumbo nucifera]
Nn1g05942	Nn1g05942	57.8103	7004	76.8422	6639	78.2053	7148	20.5687	1702	23.0858	2418	19.4554	2521	5.45374	688	4.2869	547	5.67233	889	8.86e-31	-1.55301	down	1.05e-52	-2.83822	down	3.76e-08	1.26167	up	--		Molecular Function: protein kinase activity (GO:0004672);; Molecular Function: ATP binding (GO:0005524);; Cellular Component: integral component of membrane (GO:0016021);;	K00924|1.2e-141|pop:7493980|K00924 kinase [EC:2.7.1.-] | (RefSeq) receptor protein kinase CLAVATA1	--	--	--	Protein tyrosine and serine/threonine kinase	Leucine-rich repeat receptor-like serine/threonine-protein kinase BAM1 OS=Arabidopsis thaliana OX=3702 GN=BAM1 PE=1 SV=1	T	Signal transduction mechanisms	PREDICTED: leucine-rich repeat receptor-like serine/threonine-protein kinase BAM1 [Nelumbo nucifera]
Nn1g05961	Nn1g05961	51.7019	679	40.7625	519	38.0083	572	140.048	1747	158.64	2364	124.863	1784	275.843	3850	278.439	3529	303.316	4070	8.06e-26	1.81449	up	1.6e-102	3.13846	up	2.47e-17	-1.31808	down	--	--	Biological Process: cell redox homeostasis (GO:0045454);;	K03671|3.2e-06|egu:105046418|K03671 thioredoxin 1 | (RefSeq) thioredoxin H2-2	--	--	--	Thioredoxin	--	--	--	PREDICTED: thioredoxin H2-1-like [Nelumbo nucifera]
Nn1g06051	Nn1g06051	1.18658	105	1.14278	92	1.23167	128	7.51072	699	5.80736	703	7.14248	752	3.31621	320	1.30679	124	2.65394	260	1.19e-66	2.81623	up	4.18e-05	1.54633	up	0.000825333	1.22859	up	--	--	Molecular Function: magnesium ion binding (GO:0000287);; Molecular Function: terpene synthase activity (GO:0010333);;	K18108|5.6e-88|vvi:100855144|K18108 (-)-alpha-terpineol synthase [EC:4.2.3.111] | (RefSeq) (-)-alpha-terpineol synthase	Monoterpenoid biosynthesis (ko00902)	--	--	Terpene synthase family, metal binding domain	(-)-alpha-terpineol synthase OS=Vitis vinifera OX=29760 PE=1 SV=1	S	Function unknown	PREDICTED: (-)-alpha-terpineol synthase-like [Nelumbo nucifera]
Nn1g06056	Nn1g06056	0.524262	30	0.026672	2	0	0	56.69	3381	72.4796	5116	30.2691	2063	1448.23	95768	1489.79	89410	240.048	14958	0.00027085	3.56266	up	1.26e-10	8.90631	up	4.05e-12	-4.22583	down	--	--	Molecular Function: magnesium ion binding (GO:0000287);; Molecular Function: terpene synthase activity (GO:0010333);;	K18108|8.5e-183|vvi:100855144|K18108 (-)-alpha-terpineol synthase [EC:4.2.3.111] | (RefSeq) (-)-alpha-terpineol synthase	Monoterpenoid biosynthesis (ko00902)	--	--	Terpene synthase family, metal binding domain	Myrcene synthase, chloroplastic OS=Quercus ilex OX=58334 PE=1 SV=1	S	Function unknown	PREDICTED: terpene synthase 10-like [Nelumbo nucifera]
Nn1g06065	Nn1g06065	2.9063	92	0.948562	30	1.01138	37	37.1023	1114	65.8553	2362	13.5587	467	137.16	4607	269.602	8224	184.986	5974	7.77e-09	3.99046	up	4.46e-59	7.21035	up	3.49e-06	-2.47556	down	[G]	Carbohydrate transport and metabolism	Molecular Function: hydrolase activity, hydrolyzing O-glycosyl compounds (GO:0004553);; Cellular Component: cell wall (GO:0005618);; Biological Process: xyloglucan metabolic process (GO:0010411);; Molecular Function: xyloglucan:xyloglucosyl transferase activity (GO:0016762);; Biological Process: cell wall biogenesis (GO:0042546);; Cellular Component: apoplast (GO:0048046);; Biological Process: ce…	K14504|6.7e-167|nnu:104586223|K14504 xyloglucan:xyloglucosyl transferase TCH4 [EC:2.4.1.207] | (RefSeq) probable xyloglucan endotransglucosylase/hydrolase protein 23	Plant hormone signal transduction (ko04075)	--	--	Glycosyl hydrolases family 16	Probable xyloglucan endotransglucosylase/hydrolase protein 23 OS=Arabidopsis thaliana OX=3702 GN=XTH23 PE=2 SV=1	G	Carbohydrate transport and metabolism	PREDICTED: probable xyloglucan endotransglucosylase/hydrolase protein 23 [Nelumbo nucifera]
Nn1g06092	Nn1g06092	16.4139	1220	18.4621	1327	22.455	2056	76.8248	5701	48.494	4214	69.2662	5662	69.7297	5558	93.3991	7378	158.39	12400	2.23e-15	1.85903	up	5.73e-19	2.89218	up	0.00498937	-1.0151	down	--	--	Molecular Function: DNA binding (GO:0003677);;	K01051|2.4e-19|var:108341535|K01051 pectinesterase [EC:3.1.1.11] | (RefSeq) probable pectinesterase/pectinesterase inhibitor 58	Pentose and glucuronate interconversions (ko00040)	[K]	Transcription	Myb/SANT-like DNA-binding domain	Trihelix transcription factor DF1 OS=Arabidopsis thaliana OX=3702 GN=DF1 PE=4 SV=1	K	Transcription	PREDICTED: trihelix transcription factor GT-2-like [Nelumbo nucifera]
Nn1g06106	Nn1g06106	76.1299	1161	64.5528	954	64.5568	1128	4.58502	67	2.44178	43	6.39737	107	0.385537	7	0	0	0.374076	6	1.48e-34	-3.69716	down	3.28e-68	-7.37724	down	1.06e-05	3.23058	up	--	--	Cellular Component: nucleosome (GO:0000786);; Molecular Function: DNA binding (GO:0003677);; Cellular Component: nucleus (GO:0005634);; Molecular Function: protein heterodimerization activity (GO:0046982);;	K11253|1.4e-66|adu:107470357|K11253 histone H3 | (RefSeq) histone H3.2	--	[B]	Chromatin structure and dynamics	Core histone H2A/H2B/H3/H4	Histone H3.2 OS=Arabidopsis thaliana OX=3702 GN=HTR2 PE=1 SV=2	B	Chromatin structure and dynamics	Histone superfamily protein [Theobroma cacao]
Nn1g06117	Nn1g06117	152.173	8351	147.237	7966	175.494	8549	47.1642	1905	44.2138	2803	49.4668	2381	9.2436	510	8.46007	436	19.5995	887	3.88e-41	-1.71518	down	7.55e-35	-3.30114	down	2.22e-07	1.55798	up	[E]	Amino acid transport and metabolism	Molecular Function: carboxy-lyase activity (GO:0016831);; Biological Process: carboxylic acid metabolic process (GO:0019752);; Molecular Function: pyridoxal phosphate binding (GO:0030170);;	K01590|7.4e-173|nnu:104586258|K01590 histidine decarboxylase [EC:4.1.1.22] | (RefSeq) serine decarboxylase-like	Histidine metabolism (ko00340)	[E]	Amino acid transport and metabolism	Pyridoxal-dependent decarboxylase conserved domain	Serine decarboxylase OS=Arabidopsis thaliana OX=3702 GN=SDC PE=1 SV=1	E	Amino acid transport and metabolism	PREDICTED: serine decarboxylase-like [Nelumbo nucifera]
Nn1g06125	Nn1g06125	528.899	17870	615.765	19029	400.66	14460	68.2917	2166	77.7713	3097	57.2751	2649	11.0675	386	11.4157	397	6.82398	275	1.69e-39	-2.59629	down	1.36e-85	-5.12295	down	1.29e-27	2.49266	up	--	--	--	--	--	--	--	Extensin-like region	--	--	--	PREDICTED: extensin-like [Nelumbo nucifera]
Nn1g06137	Nn1g06137	3.91881	342	3.28455	278	1.97712	198	0.723328	60	1.19684	119	0.808399	76	0.154129	15	0.192315	17	0.415559	37	1.45e-05	-1.56042	down	5.77e-12	-3.0849	down	0.00444357	1.43414	up	--	--	Molecular Function: protein serine/threonine kinase activity (GO:0004674);; Molecular Function: ATP binding (GO:0005524);; Cellular Component: integral component of membrane (GO:0016021);; Molecular Function: carbohydrate binding (GO:0030246);;	K00924|1.1e-14|cann:107840970|K00924 kinase [EC:2.7.1.-] | (RefSeq) receptor-like protein kinase 5	--	--	--	Protein kinase domain	G-type lectin S-receptor-like serine/threonine-protein kinase RLK1 OS=Arabidopsis thaliana OX=3702 GN=RLK1 PE=2 SV=2	T	Signal transduction mechanisms	PREDICTED: G-type lectin S-receptor-like serine/threonine-protein kinase LECRK1 [Nelumbo nucifera]
Nn1g06186	Nn1g06186	1.34922	48	1.18729	41	1.6658	67	9.4693	313	14.7434	581	5.16199	198	42.194	1557	34.329	1150	12.8668	458	1.01e-11	2.77404	up	1.22e-24	4.72903	up	0.000896822	-1.80237	down	--	--	Molecular Function: DNA binding (GO:0003677);; Cellular Component: nucleus (GO:0005634);; Biological Process: regulation of transcription, DNA-templated (GO:0006355);;	K20043|2.0e-17|aip:107640400|K20043 clathrin coat assembly protein AP180 | (RefSeq) putative clathrin assembly protein At5g35200	--	--	--	Dof domain, zinc finger	Dof zinc finger protein DOF1.2 OS=Arabidopsis thaliana OX=3702 GN=DOF1.2 PE=2 SV=1	K	Transcription	PREDICTED: uncharacterized protein LOC104587962 [Nelumbo nucifera]
Nn1g06200	Nn1g06200	30.1045	1946	25.2478	1568	30.6449	2295	11.5115	702	13.0404	955	13.642	950	2.55045	178	2.35939	152	1.71787	117	2.38e-14	-1.04819	down	1.32e-49	-3.21539	down	6.66e-20	2.14007	up	[GI]	Carbohydrate transport and metabolism;; Lipid transport and metabolism	Molecular Function: enzyme inhibitor activity (GO:0004857);; Cellular Component: extracellular region (GO:0005576);; Cellular Component: cell wall (GO:0005618);; Molecular Function: pectinesterase activity (GO:0030599);; Biological Process: cell wall modification (GO:0042545);; Molecular Function: aspartyl esterase activity (GO:0045330);; Biological Process: pectin catabolic process (GO:0045490);;	K01051|2.7e-26|mus:103985914|K01051 pectinesterase [EC:3.1.1.11] | (RefSeq) putative pectinesterase/pectinesterase inhibitor 28	Pentose and glucuronate interconversions (ko00040)	--	--	Pectinesterase	Probable pectinesterase/pectinesterase inhibitor 51 OS=Arabidopsis thaliana OX=3702 GN=PME51 PE=2 SV=1	G	Carbohydrate transport and metabolism	PREDICTED: probable pectinesterase/pectinesterase inhibitor 51 [Nelumbo nucifera]
Nn1g06219	Nn1g06219	40.6985	1921	35.685	1610	39.4338	2086	3.55681	150	2.79872	134	3.5892	165	10.4776	487	11.732	512	5.68657	255	1.57e-123	-3.51343	down	1.09e-07	-1.67424	down	6.4e-07	-1.79983	down	--	--	Molecular Function: purine nucleoside transmembrane transporter activity (GO:0015211);; Cellular Component: integral component of membrane (GO:0016021);;	K00850|2.6e-46|cpap:110822059|K00850 6-phosphofructokinase 1 [EC:2.7.1.11] | (RefSeq) ATP-dependent 6-phosphofructokinase 6-like	Glycolysis / Gluconeogenesis (ko00010);; Pentose phosphate pathway (ko00030);; Fructose and mannose metabolism (ko00051);; Galactose metabolism (ko00052);; Carbon metabolism (ko01200);; Biosynthesis of amino acids (ko01230);; RNA degradation (ko03018)	--	--	Purine nucleobase transmembrane transport	Purine permease 1 OS=Arabidopsis thaliana OX=3702 GN=PUP1 PE=1 SV=1	S	Function unknown	PREDICTED: purine permease 1-like [Nelumbo nucifera]
Nn1g06275	Nn1g06275	16.9877	528	16.4153	490	17.1932	595	53.576	1542	70.8873	2436	50.8756	1674	88.8984	2877	114.869	3347	85.2562	2609	2.97e-26	1.88496	up	6.99e-64	2.90941	up	1.96e-05	-1.01322	down	--	--	--	K20280|9.2e-10|gra:105804736|K20280 trafficking protein particle complex subunit 5 | (RefSeq) leukotriene A-4 hydrolase homolog	--	--	--	Tetratricopeptide repeat	--	--	--	PREDICTED: uncharacterized protein LOC104599565 [Nelumbo nucifera]
Nn1g06345	Nn1g06345	18.1802	725	14.662	567	22.5614	1032	256.418	9675	162.24	7333	133.94	5793	682.478	28896	893.829	34353	612.456	24922	5.26e-35	3.36684	up	1.48e-127	5.69891	up	5.36e-13	-2.24846	down	[IR]	Lipid transport and metabolism;; General function prediction only	Molecular Function: hydrolase activity, acting on ester bonds (GO:0016788);;	K10691|1.5e-70|ats:109762802|K10691 E3 ubiquitin-protein ligase UBR4 [EC:2.3.2.27] | (RefSeq) LOC109762802; auxin transport protein BIG	--	--	--	GDSL-like Lipase/Acylhydrolase	GDSL esterase/lipase At5g45950 OS=Arabidopsis thaliana OX=3702 GN=At5g45950 PE=2 SV=1	I	Lipid transport and metabolism	PREDICTED: GDSL esterase/lipase At5g45950-like [Nelumbo nucifera]
Nn1g06373	Nn1g06373	112.696	1718	115.345	1704	90.6244	1584	3.40641	50	2.89892	51	5.1185	85	0.113974	2	0.230156	4	0	0	4.99e-89	-4.59256	down	1.12e-57	-8.95081	down	6.85e-09	4.00436	up	--	--	Cellular Component: nucleosome (GO:0000786);; Molecular Function: DNA binding (GO:0003677);; Cellular Component: nucleus (GO:0005634);; Molecular Function: protein heterodimerization activity (GO:0046982);;	K11253|1.4e-66|adu:107470357|K11253 histone H3 | (RefSeq) histone H3.2	--	[B]	Chromatin structure and dynamics	Core histone H2A/H2B/H3/H4	Histone H3.2 OS=Arabidopsis thaliana OX=3702 GN=HTR2 PE=1 SV=2	B	Chromatin structure and dynamics	Histone superfamily protein [Theobroma cacao]
Nn1g06399	Nn1g06399	19.2441	1422	20.0575	1425	17.8583	1501	7.00512	487	7.20856	616	8.36308	680	1.9963	151	1.91631	134	3.11165	219	1.33e-18	-1.19061	down	2.51e-38	-2.65459	down	3.36e-09	1.43941	up	--	--	Biological Process: reproduction (GO:0000003);; Molecular Function: regulatory region nucleic acid binding (GO:0001067);; Biological Process: developmental process involved in reproduction (GO:0003006);; Molecular Function: molecular_function (GO:0003674);; Molecular Function: nucleic acid binding (GO:0003676);; Molecular Function: DNA binding (GO:0003677);; Molecular Function: transcription fact…	--	--	[R]	General function prediction only	--	Zinc finger protein NUTCRACKER OS=Arabidopsis thaliana OX=3702 GN=NUC PE=1 SV=1	S	Function unknown	PREDICTED: zinc finger protein MAGPIE-like [Nelumbo nucifera]
Nn1g06431	Nn1g06431	36.219	2142	33.5983	1941	34.1021	2313	13.7612	792	11.1921	767	15.8906	1040	2.52529	160	0.851297	51	0.473467	29	8.81e-15	-1.18965	down	3.65e-14	-4.15467	down	5.03e-07	2.84816	up	--	--	--	K20720|4.1e-38|eus:EUTSA_v10013006mg|K20720 reticulon-4 | (RefSeq) hypothetical protein	--	--	--	Reticulon	Reticulon-like protein B17 OS=Arabidopsis thaliana OX=3702 GN=RTNLB17 PE=2 SV=1	S	Function unknown	PREDICTED: reticulon-like protein B17 [Nelumbo nucifera]
Nn1g06457	Nn1g06457	10.892	534	9.26327	440	10.7565	604	4.44588	207	2.45763	137	5.27157	281	0.031132	2	0	0	0	0	6.45e-05	-1.19257	down	1.14e-26	-8.46555	down	9.15e-20	6.55122	up	--	--	--	--	--	--	--	bHLH-MYC and R2R3-MYB transcription factors N-terminal	Protein RICE SALT SENSITIVE 3 OS=Oryza sativa subsp. japonica OX=39947 GN=RSS3 PE=1 SV=1	S	Function unknown	PREDICTED: uncharacterized protein LOC104599441 [Nelumbo nucifera]
Nn1g06463	Nn1g06463	13.6826	1266	18.3015	1659	11.2631	1207	1.44099	124	1.0498	113	1.51156	152	0.03547	3	0.083155	8	0.048611	5	5.68e-39	-3.26714	down	2.52e-62	-7.42646	down	3.79e-17	4.00952	up	--	--	Cellular Component: spindle (GO:0005819);; Cellular Component: microtubule (GO:0005874);; Biological Process: activation of protein kinase activity (GO:0032147);; Biological Process: regulation of mitotic spindle organization (GO:0060236);;	K16812|0.0e+00|nnu:104599436|K16812 targeting protein for Xklp2 | (RefSeq) protein TPX2-like	--	--	--	Cell cycle regulated microtubule associated protein	Protein TPX2 OS=Arabidopsis thaliana OX=3702 GN=TPX2 PE=1 SV=1	S	Function unknown	PREDICTED: protein TPX2-like isoform X2 [Nelumbo nucifera]
Nn1g06476	Nn1g06476	10.2083	852	11.0205	880	6.26666	606	2.42145	189	4.61093	423	3.70413	337	0	0	0.026191	2	0	0	0.000163789	-1.21397	down	1.45e-28	-8.97036	down	6.97e-25	7.10975	up	--	--	Molecular Function: DNA binding (GO:0003677);; Cellular Component: nucleus (GO:0005634);;	K01653|8.7e-16|rcu:8262764|K01653 acetolactate synthase I/III small subunit [EC:2.2.1.6] | (RefSeq) B3 domain-containing transcription factor ABI3	Valine, leucine and isoleucine biosynthesis (ko00290);; Butanoate metabolism (ko00650);; C5-Branched dibasic acid metabolism (ko00660);; Pantothenate and CoA biosynthesis (ko00770);; 2-Oxocarboxylic acid metabolism (ko01210);; Biosynthesis of amino acids (ko01230)	--	--	B3 DNA binding domain	B3 domain-containing transcription factor LEC2 OS=Arabidopsis thaliana OX=3702 GN=LEC2 PE=1 SV=1	K	Transcription	PREDICTED: B3 domain-containing protein IDEF1 [Nelumbo nucifera]
Nn1g06497	Nn1g06497	62.6626	3557	88.1925	4882	72.6051	4848	16.1713	876	29.4835	1902	18.7247	1150	0.778954	50	0.475301	29	0.701219	44	1.93e-09	-1.65146	down	1.58e-124	-6.26897	down	8.4e-40	4.4907	up	--	--	Molecular Function: electron carrier activity (GO:0009055);;	--	--	--	--	--	Early nodulin-like protein 1 OS=Oryza sativa subsp. japonica OX=39947 GN=ENODL1 PE=1 SV=1	S	Function unknown	PREDICTED: early nodulin-like protein 2 [Nelumbo nucifera]
Nn1g06506	Nn1g06506	14.1208	785	23.4144	1259	26.2623	1677	3.9197	208	2.98217	195	5.83414	355	0.027822	2	0	0	0.086834	6	6.83e-11	-2.12651	down	1.65e-43	-8.11118	down	7.99e-22	5.64488	up	[Q]	Secondary metabolites biosynthesis, transport and catabolism	Molecular Function: diacylglycerol O-acyltransferase activity (GO:0004144);; Biological Process: glycerolipid biosynthetic process (GO:0045017);;	K20098|2.6e-64|mtr:MTR_4g078460|K20098 DNA excision repair protein ERCC-6-like 2 [EC:3.6.4.-] | (RefSeq) DNA repair and recombination RAD26-like protein, putative	--	--	--	WS/DGAT C-terminal domain	O-acyltransferase WSD1 OS=Arabidopsis thaliana OX=3702 GN=WSD1 PE=2 SV=1	S	Function unknown	PREDICTED: O-acyltransferase WSD1-like [Nelumbo nucifera]
Nn1g06514	Nn1g06514	15.0123	554	17.5574	611	14.0074	565	1.88241	72	0.849607	40	2.43906	104	0	0	0	0	0	0	3.03e-16	-2.80577	down	8.54e-19	-9.81805	down	6.54e-11	5.89561	up	--	--	--	--	--	--	--	--	--	S	Function unknown	PREDICTED: non-classical arabinogalactan protein 31-like [Nelumbo nucifera]
Nn1g06521	Nn1g06521	2.97936	103	2.61679	88	2.17826	87	12.244	402	14.4462	566	14.5882	548	60.9369	2235	29.4687	982	12.935	456	1.22e-37	2.50598	up	2.27e-14	4.06842	up	0.00398463	-1.55676	down	--	--	--	--	--	--	--	PDDEXK-like family of unknown function	--	S	Function unknown	PREDICTED: uncharacterized protein LOC104599397 [Nelumbo nucifera]
Nn1g06584	Nn1g06584	10.4926	376	9.61645	336	8.1011	345	19.8008	686	44.2912	1867	15.4651	603	79.2848	3008	50.2384	1767	48.68	1866	9.29e-05	1.57538	up	1.12e-32	3.08143	up	0.00298974	-1.39826	down	--	--	--	--	--	--	--	Aluminium induced protein	Stem-specific protein TSJT1 OS=Nicotiana tabacum OX=4097 GN=TSJT1 PE=2 SV=1	S	Function unknown	PREDICTED: stem-specific protein TSJT1-like [Nelumbo nucifera]
Nn1g06598	Nn1g06598	10.166	521	10.1727	487	8.09053	454	32.8972	1514	25.3348	1399	45.3141	2393	0.076615	6	0.050377	4	0.090639	6	2.36e-15	1.9153	up	3.3e-47	-5.96803	down	4.77e-72	7.639	up	--	--	Cellular Component: extracellular region (GO:0005576);; Biological Process: sexual reproduction (GO:0019953);;	K20628|1.4e-123|nnu:104587163|K20628 expansin | (RefSeq) expansin-B3-like	--	--	--	Expansin C-terminal domain	Expansin-B3 OS=Arabidopsis thaliana OX=3702 GN=EXPB3 PE=2 SV=2	S	Function unknown	PREDICTED: expansin-B3-like [Nelumbo nucifera]
Nn1g06602	Nn1g06602	14.6543	655	11.9251	547	12.3709	676	60.504	2852	115.303	5844	37.9025	1937	219.864	10432	161.187	6942	93.407	4423	9.1e-13	2.50081	up	1.63e-33	3.96165	up	0.00534236	-1.35343	down	--	--	--	--	--	[C]	Energy production and conversion	CBS domain	CBS domain-containing protein CBSX5 OS=Arabidopsis thaliana OX=3702 GN=CBSX5 PE=2 SV=2	L	Replication, recombination and repair	PREDICTED: CBS domain-containing protein CBSX5-like [Nelumbo nucifera]
Nn1g06677	Nn1g06677	59.6663	830	47.7521	648	51.9216	831	447.895	5937	372.726	5906	421.394	6406	8.89086	133	5.25958	72	19.6954	286	2.36e-140	3.07739	up	0.000110893	-1.76549	down	4.56e-27	4.66573	up	--	--	--	--	--	--	--	--	--	S	Function unknown	--
Nn1g06715	Nn1g06715	2.5139	144	2.00704	111	2.40621	157	10.9382	587	9.29467	596	6.83948	424	16.295	978	26.6015	1446	14.5939	843	1.01e-17	2.04906	up	9.84e-33	3.4368	up	4.08e-05	-1.35725	down	--	--	Molecular Function: nucleic acid binding (GO:0003676);; Molecular Function: endonuclease activity (GO:0004519);; Biological Process: DNA catabolic process (GO:0006308);;	--	--	--	--	S1/P1 Nuclease	Endonuclease 1 OS=Arabidopsis thaliana OX=3702 GN=ENDO1 PE=1 SV=1	S	Function unknown	PREDICTED: endonuclease 1-like [Nelumbo nucifera]
Nn1g06722	Nn1g06722	2.09896	153	1.70485	107	2.07574	151	3.86033	282	6.58935	445	4.4473	299	14.3291	937	12.8263	791	15.9412	1013	1.03e-08	1.39544	up	1.87e-76	3.18606	up	2.79e-16	-1.77	down	--	--	Cellular Component: cellular_component (GO:0005575);; Cellular Component: intracellular (GO:0005622);; Cellular Component: cell (GO:0005623);; Cellular Component: nucleus (GO:0005634);; Cellular Component: cytoplasm (GO:0005737);; Cellular Component: cytosol (GO:0005829);; Biological Process: biological_process (GO:0008150);; Biological Process: regulation of flower development (GO:0009909);; Bio…	--	--	--	--	--	Protein ULTRAPETALA 1 OS=Arabidopsis thaliana OX=3702 GN=ULT1 PE=1 SV=1	S	Function unknown	PREDICTED: protein ULTRAPETALA 1-like isoform X1 [Nelumbo nucifera]
Nn1g06738	Nn1g06738	0.654615	34	0.957199	38	0.442976	22	9.22612	331	11.6297	549	8.2805	372	30.3459	1250	21.6867	905	16.3432	730	8.66e-31	3.69054	up	2.56e-52	5.31684	up	2.54e-07	-1.55405	down	--	--	--	--	--	--	--	--	--	--	--	PREDICTED: uncharacterized protein LOC104605668 [Nelumbo nucifera]
Nn1g06778	Nn1g06778	27.2964	1770	22.9826	1445	25.6314	1906	10.5238	649	8.00547	590	12.299	868	3.34429	231	2.07034	130	1.65535	110	2.8e-10	-1.16322	down	6.79e-22	-2.95337	down	1.37e-06	1.74693	up	--	--	--	--	--	[S]	Function unknown	Armadillo/beta-catenin-like repeat	--	Q	Secondary metabolites biosynthesis, transport and catabolism	PREDICTED: vacuolar protein 8-like [Nelumbo nucifera]
Nn1g06816	Nn1g06816	159.511	8267	179.643	8749	122.668	7333	58.0752	2762	50.7601	2931	71.5189	3998	10.681	565	10.1676	510	12.8515	678	6.49e-10	-1.23419	down	1.16e-68	-3.34774	down	1.11e-24	2.08339	up	--	--	Cellular Component: cellular_component (GO:0005575);; Cellular Component: cell (GO:0005623);; Cellular Component: plasma membrane (GO:0005886);; Cellular Component: membrane (GO:0016020);; Cellular Component: intrinsic component of membrane (GO:0031224);; Cellular Component: anchored component of membrane (GO:0031225);; Cellular Component: intrinsic component of plasma membrane (GO:0031226);; Cel…	--	--	--	--	SPARK	Uncharacterized GPI-anchored protein At4g28100 OS=Arabidopsis thaliana OX=3702 GN=At4g28100 PE=2 SV=1	S	Function unknown	PREDICTED: uncharacterized GPI-anchored protein At4g28100-like [Nelumbo nucifera]
Nn1g06819	Nn1g06819	3.54595	187	3.90204	199	3.48981	211	41.4562	2165	52.9781	3256	33.606	1901	62.4096	3730	73.8626	3856	84.2209	4837	1.39e-60	3.65497	up	1.27e-207	4.81766	up	1.07e-05	-1.1153	down	--	--	Molecular Function: nucleoside transmembrane transporter activity (GO:0005337);; Cellular Component: integral component of membrane (GO:0016021);;	K15014|3.8e-216|nnu:104605718|K15014 solute carrier family 29 (equilibrative nucleoside transporter), member 1/2/3 | (RefSeq) equilibrative nucleotide transporter 3-like	--	[F]	Nucleotide transport and metabolism	Nucleoside transporter	Equilibrative nucleotide transporter 3 OS=Arabidopsis thaliana OX=3702 GN=ENT3 PE=1 SV=1	F	Nucleotide transport and metabolism	PREDICTED: equilibrative nucleotide transporter 3-like [Nelumbo nucifera]
Nn1g06823	Nn1g06823	14.7634	529	14.1849	493	15.8122	650	6.60938	225	5.61017	229	6.75444	264	0.508044	20	0.124951	5	0.038506	2	4.55e-13	-1.10554	down	2.38e-20	-5.31347	down	6.03e-11	3.98129	up	--	--	Cellular Component: nucleus (GO:0005634);; Cellular Component: host cell nucleus (GO:0042025);; Biological Process: regulation of cell cycle (GO:0051726);;	K18812|7.6e-183|nnu:104605722|K18812 cyclin D6, plant | (RefSeq) putative cyclin-D6-1	--	[D]	Cell cycle control, cell division, chromosome partitioning	Cyclin, N-terminal domain	Putative cyclin-D6-1 OS=Arabidopsis thaliana OX=3702 GN=CYCD6-1 PE=3 SV=1	D	Cell cycle control, cell division, chromosome partitioning	PREDICTED: putative cyclin-D6-1 [Nelumbo nucifera]
Nn1g06878	Nn1g06878	56.8885	3241	48.2714	2707	30.4557	2177	123.222	6571	180.781	12524	78.4576	4920	456.059	29634	508.16	27204	269.079	15008	4.28e-06	1.58389	up	5.93e-26	3.55749	up	7.81e-06	-1.89348	down	--	--	Molecular Function: ATP binding (GO:0005524);; Molecular Function: ATPase activity (GO:0016887);;	K12608|5.3e-21|nnu:104600900|K12608 CCR4-NOT complex subunit CAF16 | (RefSeq) ABC transporter I family member 19	RNA degradation (ko03018)	[RK]	General function prediction only;; Transcription	--	ABC transporter I family member 19 OS=Arabidopsis thaliana OX=3702 GN=ABCI19 PE=2 SV=1	K	Transcription	PREDICTED: ABC transporter I family member 19 [Nelumbo nucifera]
Nn1g06895	Nn1g06895	1.8398	411	1.70441	369	1.53337	393	0.46632	99	0.609896	155	0.739768	180	0.034568	9	0.060303	13	0.138988	32	5.33e-09	-1.33321	down	2.4e-21	-3.93729	down	9.57e-07	2.48714	up	--	--	--	--	--	--	--	--	--	--	--	pentatricopeptide repeat-containing protein At4g18975, chloroplastic-like isoform X2 [Durio zibethinus]
Nn1g06912	Nn1g06912	91.7126	3310	101.237	3482	115.889	4807	476.403	16426	564.118	23479	501.499	19802	15.257	600	30.7296	1072	55.9055	2084	2.93e-60	2.44887	up	0.00709365	-1.15726	down	5.96e-17	3.48664	up	--	--	Molecular Function: hydrolase activity, hydrolyzing O-glycosyl compounds (GO:0004553);; Cellular Component: cell wall (GO:0005618);; Biological Process: xyloglucan metabolic process (GO:0010411);; Molecular Function: xyloglucan:xyloglucosyl transferase activity (GO:0016762);; Biological Process: cell wall biogenesis (GO:0042546);; Cellular Component: apoplast (GO:0048046);; Biological Process: ce…	K08235|6.2e-82|nnu:104604962|K08235 xyloglucan:xyloglucosyl transferase [EC:2.4.1.207] | (RefSeq) xyloglucan endotransglucosylase/hydrolase protein 9	--	--	--	Xyloglucan endo-transglycosylase (XET) C-terminus	Xyloglucan endotransglucosylase/hydrolase protein 9 OS=Arabidopsis thaliana OX=3702 GN=XTH9 PE=2 SV=2	G	Carbohydrate transport and metabolism	PREDICTED: xyloglucan endotransglucosylase/hydrolase protein 9 [Nelumbo nucifera]
Nn1g06917	Nn1g06917	4.02078	252	3.17644	186	3.5897	140	15.6554	656	26.0901	1326	10.5067	542	127.868	4711	110.107	4042	46.8749	1820	3.55e-08	2.10603	up	3.7e-27	4.5669	up	4.09e-07	-2.34432	down	[G]	Carbohydrate transport and metabolism	Molecular Function: hydrolase activity, hydrolyzing O-glycosyl compounds (GO:0004553);; Biological Process: carbohydrate metabolic process (GO:0005975);;	K01188|3.5e-82|nnu:104604959|K01188 beta-glucosidase [EC:3.2.1.21] | (RefSeq) putative beta-glucosidase 41	Cyanoamino acid metabolism (ko00460);; Starch and sucrose metabolism (ko00500);; Phenylpropanoid biosynthesis (ko00940)	[G]	Carbohydrate transport and metabolism	Glycosyl hydrolase family 1	Putative beta-glucosidase 41 OS=Arabidopsis thaliana OX=3702 GN=BGLU41 PE=3 SV=2	G	Carbohydrate transport and metabolism	PREDICTED: putative beta-glucosidase 41 isoform X3 [Nelumbo nucifera]
Nn1g06944	Nn1g06944	64.9972	1335	61.2792	1184	64.9941	1519	15.2501	290	9.5736	226	16.3761	373	1.79619	43	1.89956	43	1.59073	39	1.38e-21	-2.04627	down	3.47e-139	-4.53893	down	3.79e-14	2.41459	up	--	--	Cellular Component: nucleosome (GO:0000786);; Molecular Function: DNA binding (GO:0003677);; Cellular Component: nucleus (GO:0005634);; Molecular Function: protein heterodimerization activity (GO:0046982);;	K11251|9.3e-25|nnu:104604938|K11251 histone H2A | (RefSeq) probable histone H2A.3	--	[B]	Chromatin structure and dynamics	--	Probable histone H2A.1 OS=Oryza sativa subsp. indica OX=39946 GN=OsI_26380 PE=3 SV=2	B	Chromatin structure and dynamics	PREDICTED: probable histone H2A.3 [Nelumbo nucifera]
Nn1g06945	Nn1g06945	4.17661	272	4.54009	287	2.85794	214	0.689556	43	0.823909	61	1.2009	86	0.262534	19	0.323329	21	0.329968	22	4.93e-09	-1.89973	down	2.73e-21	-3.16904	down	0.00617237	1.18917	up	--	--	--	K22733|1.5e-75|cit:102612526|K22733 magnesium transporter | (RefSeq) uncharacterized protein LOC102612526	--	[R]	General function prediction only	PPR repeat	Pentatricopeptide repeat-containing protein At1g08070, chloroplastic OS=Arabidopsis thaliana OX=3702 GN=PCMP-H12 PE=2 SV=1	S	Function unknown	PREDICTED: pentatricopeptide repeat-containing protein At3g29230-like [Nelumbo nucifera]
Nn1g06952	Nn1g06952	13.1865	380	18.0973	493	12.4062	405	301.468	8075	302.259	9749	328.671	10132	27.1669	817	34.6518	957	13.3056	389	8.7e-147	4.49221	up	0.00290624	1.19948	up	4.44e-19	3.21124	up	--	--	Molecular Function: calcium ion binding (GO:0005509);; Cellular Component: photosystem II oxygen evolving complex (GO:0009654);; Biological Process: photosynthesis (GO:0015979);; Cellular Component: extrinsic component of membrane (GO:0019898);;	K08901|1.1e-95|nnu:104604934|K08901 photosystem II oxygen-evolving enhancer protein 3 | (RefSeq) oxygen-evolving enhancer protein 3-2, chloroplastic-like	Photosynthesis (ko00195)	--	--	Oxygen evolving enhancer protein 3 (PsbQ)	Oxygen-evolving enhancer protein 3-2, chloroplastic OS=Arabidopsis thaliana OX=3702 GN=PSBQ2 PE=1 SV=2	S	Function unknown	PREDICTED: oxygen-evolving enhancer protein 3-2, chloroplastic-like [Nelumbo nucifera]
Nn1g06957	Nn1g06957	11.3592	1036	12.9613	1151	9.3313	982	1.31067	114	1.16887	120	1.13574	111	0.211373	22	0.09449	9	0.116603	12	3.33e-53	-3.07353	down	4.45e-64	-5.70109	down	8.75e-10	2.54483	up	--	--	Molecular Function: microtubule motor activity (GO:0003777);; Molecular Function: ATP binding (GO:0005524);; Cellular Component: microtubule (GO:0005874);; Biological Process: microtubule-based movement (GO:0007018);; Molecular Function: microtubule binding (GO:0008017);;	K10405|0.0e+00|nnu:104604933|K10405 kinesin family member C1 | (RefSeq) kinesin-like protein KIN-14C	--	[Z]	Cytoskeleton	Kinesin motor domain	Kinesin-like protein KIN-14C OS=Arabidopsis thaliana OX=3702 GN=KIN14C PE=2 SV=1	Z	Cytoskeleton	PREDICTED: kinesin-like protein KIN-14C isoform X1 [Nelumbo nucifera]
Nn1g07023	Nn1g07023	0.599178	43	0.694461	31	0.496057	35	2.26193	104	5.62463	262	0.912031	42	13.3097	598	18.5113	750	8.65527	359	0.00341512	1.78102	up	6.75e-32	4.38083	up	0.00018024	-2.26604	down	--	--	Cellular Component: integral component of membrane (GO:0016021);;	--	--	--	--	--	--	S	Function unknown	PREDICTED: uncharacterized protein LOC104604898 [Nelumbo nucifera]
Nn1g07130	Nn1g07130	30.677	686	41.1535	859	43.3159	1057	2.90702	60	2.88617	80	5.12485	127	1.11877	28	0.300595	9	0.742102	20	1.78e-29	-3.12408	down	8.88e-45	-4.99942	down	0.000944022	1.74658	up	--	--	Molecular Function: DNA binding (GO:0003677);; Cellular Component: nucleus (GO:0005634);;	K09422|2.3e-11|ath:AT2G46410|K09422 transcription factor MYB, plant | (RefSeq) CPC; Homeodomain-like superfamily protein	--	--	--	Myb-like DNA-binding domain	Transcription factor CPC OS=Arabidopsis thaliana OX=3702 GN=CPC PE=1 SV=1	--	--	PREDICTED: transcription factor CPC-like [Nelumbo nucifera]
Nn1g07138	Nn1g07138	14.7636	2189	12.4799	1793	15.4815	2524	30.0301	4274	28.7706	4633	27.5369	4148	50.444	6926	71.651	9551	51.9629	7399	2.65e-19	1.11267	up	1.3e-31	2.33857	up	1.29e-08	-1.22624	down	[G]	Carbohydrate transport and metabolism	Molecular Function: glycogen (starch) synthase activity (GO:0004373);; Molecular Function: starch binding (GO:2001070);;	K00703|0.0e+00|nnu:104612797|K00703 starch synthase [EC:2.4.1.21] | (RefSeq) SSS; starch synthase 3, chloroplastic/amyloplastic	Starch and sucrose metabolism (ko00500)	--	--	Starch/carbohydrate-binding module (family 53)	Soluble starch synthase 3, chloroplastic/amyloplastic OS=Solanum tuberosum OX=4113 GN=SS3 PE=1 SV=1	G	Carbohydrate transport and metabolism	PREDICTED: starch synthase 3, chloroplastic/amyloplastic isoform X1 [Nelumbo nucifera]
Nn1g07141	Nn1g07141	7.34416	160	6.47721	137	6.30643	157	9.86023	204	20.3771	502	9.66232	229	1.07653	25	1.08606	23	1.95215	44	0.00325404	1.07998	up	1.57e-08	-1.83829	down	2.93e-10	2.83031	up	--	--	--	K20855|1.5e-29|pavi:110763119|K20855 beta-1,3-galactosyltransferase 1/2/3/4/5/7/8 [EC:2.4.1.-] | (RefSeq) probable beta-1,3-galactosyltransferase 2	--	--	--	Senescence regulator	--	S	Function unknown	PREDICTED: uncharacterized protein LOC104612795 [Nelumbo nucifera]
Nn1g07155	Nn1g07155	24.1551	1197	24.9088	1194	24.0255	1338	7.17314	357	4.93188	256	10.1532	555	0.306775	15	1.4399	65	0.326222	19	8.91e-08	-1.53831	down	1.07e-18	-4.62865	down	1.1e-06	2.91476	up	--	--	Molecular Function: molecular_function (GO:0003674);; Molecular Function: receptor binding (GO:0005102);; Molecular Function: binding (GO:0005488);; Molecular Function: protein binding (GO:0005515);; Cellular Component: cellular_component (GO:0005575);; Cellular Component: intracellular (GO:0005622);; Cellular Component: cell (GO:0005623);; Cellular Component: cytoplasm (GO:0005737);; Cellular Co…	K21437|1.4e-259|nnu:104612780|K21437 ankyrin repeat domain-containing protein 13 | (RefSeq) ankyrin repeat domain-containing protein 13C	--	[R]	General function prediction only	GPCR-chaperone	--	S	Function unknown	PREDICTED: ankyrin repeat domain-containing protein 13C [Nelumbo nucifera]
Nn1g07296	Nn1g07296	533.916	34041	545.086	33970	458.652	33733	165.883	10240	165.989	12358	199.955	14032	2.66789	203	3.47803	241	9.57226	642	2.11e-26	-1.38019	down	1.38e-48	-6.02355	down	2.7e-27	4.53199	up	--	--	Molecular Function: hydrolase activity, hydrolyzing O-glycosyl compounds (GO:0004553);; Biological Process: carbohydrate metabolic process (GO:0005975);;	K19891|7.7e-108|smo:SELMODRAFT_442025|K19891 glucan endo-1,3-beta-glucosidase 1/2/3 [EC:3.2.1.39] | (RefSeq) hypothetical protein	Starch and sucrose metabolism (ko00500)	--	--	Glycosyl hydrolases family 17	Glucan endo-1,3-beta-glucosidase 12 OS=Arabidopsis thaliana OX=3702 GN=At4g29360 PE=2 SV=1	G	Carbohydrate transport and metabolism	PREDICTED: glucan endo-1,3-beta-glucosidase 12-like [Nelumbo nucifera]
Nn1g07322	Nn1g07322	52.2889	704	16.0609	210	41.8369	646	319.513	4085	324.922	4965	219.261	3211	1.90912	28	0.484246	7	0.664871	10	9.73e-16	2.98674	up	8.12e-14	-4.47577	down	3.81e-66	7.38374	up	--	--	Biological Process: lipid transport (GO:0006869);; Molecular Function: lipid binding (GO:0008289);;	--	--	--	--	Probable lipid transfer	--	O	Posttranslational modification, protein turnover, chaperones	Plant lipid transfer protein/Par allergen [Macleaya cordata]
Nn1g07334	Nn1g07334	11.9137	613	13.1686	644	10.4775	689	2.85739	180	3.49583	241	4.74391	238	0.442891	22	0.301922	15	0.704316	40	1.02e-21	-1.46172	down	5.32e-40	-4.1788	down	1.52e-12	2.65076	up	--	--	Biological Process: phosphorelay signal transduction system (GO:0000160);; Cellular Component: nucleus (GO:0005634);;	K12130|1.8e-49|nnu:104590049|K12130 pseudo-response regulator 5 | (RefSeq) two-component response regulator-like PRR95	Circadian rhythm - plant (ko04712)	--	--	--	--	K	Transcription	PREDICTED: two-component response regulator-like PRR95 [Nelumbo nucifera]
Nn1g07359	Nn1g07359	14.1877	609	10.6639	452	13.5351	663	29.4155	1205	28.8913	1413	24.8975	1152	39.838	1826	56.8624	2381	44.9844	1997	6.6e-15	1.23159	up	1.13e-32	2.30979	up	1.24e-07	-1.07736	down	--	--	--	--	--	--	--	Protein of unknown function (DUF1664)	--	S	Function unknown	PREDICTED: uncharacterized protein LOC104594150 [Nelumbo nucifera]
Nn1g07370	Nn1g07370	1.64282	113	4.51957	299	2.93742	230	78.9682	5070	45.3079	3479	123.923	9100	0.043031	4	0	0	0.045332	4	5.48e-29	4.61132	up	1.48e-15	-5.61055	down	4.39e-70	9.80649	up	[QV]	Secondary metabolites biosynthesis, transport and catabolism;; Defense mechanisms	Molecular Function: monooxygenase activity (GO:0004497);; Molecular Function: iron ion binding (GO:0005506);; Cellular Component: integral component of membrane (GO:0016021);; Molecular Function: oxidoreductase activity, acting on paired donors, with incorporation or reduction of molecular oxygen (GO:0016705);; Molecular Function: heme binding (GO:0020037);;	K05280|1.2e-108|vvi:100263810|K05280 flavonoid 3'-monooxygenase [EC:1.14.14.82] | (RefSeq) F3'H, VvF3'h1, VvF3'h2; flavonoid 3'-monooxygenase-like	Flavonoid biosynthesis (ko00941);; Flavone and flavonol biosynthesis (ko00944)	[Q]	Secondary metabolites biosynthesis, transport and catabolism	Cytochrome P450	Geraniol 8-hydroxylase OS=Swertia mussotii OX=137888 GN=CYP76B10 PE=1 SV=1	Q	Secondary metabolites biosynthesis, transport and catabolism	PREDICTED: geraniol 8-hydroxylase-like [Nelumbo nucifera]
Nn1g07400	Nn1g07400	12.2239	425	11.1178	373	11.7846	467	58.4137	1870	82.7612	3176	61.043	2227	253.625	9160	229.555	7548	466.624	16132	1.05e-44	2.58836	up	3.7e-73	5.10329	up	2.06e-14	-2.48119	down	--	--	--	--	--	--	--	--	--	--	--	PREDICTED: fruit protein pKIWI501-like [Nelumbo nucifera]
Nn1g07418	Nn1g07418	3.85221	271	3.22453	205	3.07798	248	17.108	959	77.3564	5065	11.7787	831	233.511	13841	323.371	17343	221.085	11898	0.000106192	2.77576	up	1.92e-173	6.33053	up	4.12e-06	-2.8157	down	[G]	Carbohydrate transport and metabolism	Cellular Component: integral component of membrane (GO:0016021);; Molecular Function: transmembrane transporter activity (GO:0022857);;	K14445|4.9e-89|nnu:104594186|K14445 solute carrier family 13 (sodium-dependent dicarboxylate transporter), member 2/3/5 | (RefSeq) tonoplast dicarboxylate transporter-like	--	[P]	Inorganic ion transport and metabolism	Sodium:sulfate symporter transmembrane region	Tonoplast dicarboxylate transporter OS=Arabidopsis thaliana OX=3702 GN=TDT PE=2 SV=2	P	Inorganic ion transport and metabolism	PREDICTED: tonoplast dicarboxylate transporter-like [Nelumbo nucifera]
Nn1g07421	Nn1g07421	78.2922	1072	90.6875	1203	98.7104	1549	164.705	2141	132.209	2054	205.782	3064	24.3701	355	18.58	246	25.7987	361	9.27e-07	1.01716	up	1.36e-13	-1.52984	down	2.99e-24	2.52084	up	--	--	Molecular Function: cysteine-type endopeptidase inhibitor activity (GO:0004869);;	K13899|2.1e-24|pmum:103326979|K13899 cystatin-C | (RefSeq) cysteine proteinase inhibitor 1	--	--	--	Aspartic acid proteinase inhibitor	Cysteine proteinase inhibitor 1 OS=Actinidia deliciosa OX=3627 PE=1 SV=1	G	Carbohydrate transport and metabolism	PREDICTED: cysteine proteinase inhibitor 1-like [Nelumbo nucifera]
Nn1g07439	Nn1g07439	1.00819	25	1.74403	45	0.823316	23	19.0319	467	14.5361	453	9.04014	251	27.2632	658	43.3955	1086	25.7382	702	1.03e-17	3.55232	up	3.17e-37	5.07874	up	0.000398723	-1.37598	down	--	--	--	--	--	--	--	--	--	--	--	PREDICTED: uncharacterized protein LOC104594204 [Nelumbo nucifera]
Nn1g07450	Nn1g07450	3.78441	105	4.42551	119	3.19463	101	59.3445	1552	66.6727	2097	65.7137	1988	0.752662	23	0.827062	22	0.598956	18	6.01e-133	4.16501	up	4.72e-08	-1.89951	down	2.17e-139	6.02681	up	--	--	Cellular Component: photosystem I (GO:0009522);; Cellular Component: photosystem II (GO:0009523);; Cellular Component: chloroplast thylakoid membrane (GO:0009535);; Biological Process: photosynthesis, light harvesting (GO:0009765);; Cellular Component: integral component of membrane (GO:0016021);; Molecular Function: chlorophyll binding (GO:0016168);; Biological Process: protein-chromophore linka…	K08913|6.1e-154|nnu:104594210|K08913 light-harvesting complex II chlorophyll a/b binding protein 2 | (RefSeq) chlorophyll a-b binding protein 151, chloroplastic-like	Photosynthesis - antenna proteins (ko00196)	--	--	Chlorophyll A-B binding protein	Chlorophyll a-b binding protein 151, chloroplastic OS=Gossypium hirsutum OX=3635 GN=CAB-151 PE=2 SV=2	C	Energy production and conversion	PREDICTED: chlorophyll a-b binding protein 151, chloroplastic-like [Nelumbo nucifera]
Nn1g07483	Nn1g07483	31.8194	1527	29.4804	1298	24.6983	1462	74.7633	3495	69.2267	3871	59.5052	3209	194.81	10554	220.149	10835	186.927	10043	5.93e-24	1.39828	up	2.63e-155	3.3263	up	2.43e-34	-1.92397	down	--	--	Cellular Component: integral component of membrane (GO:0016021);; Molecular Function: metal ion transmembrane transporter activity (GO:0046873);;	K14709|3.9e-95|nnu:104594232|K14709 solute carrier family 39 (zinc transporter), member 1/2/3 | (RefSeq) zinc transporter 11	--	[P]	Inorganic ion transport and metabolism	ZIP Zinc transporter	Zinc transporter 11 OS=Arabidopsis thaliana OX=3702 GN=ZIP11 PE=2 SV=1	P	Inorganic ion transport and metabolism	PREDICTED: zinc transporter 11 isoform X1 [Nelumbo nucifera]
Nn1g07498	Nn1g07498	1.75827	46	1.47413	38	1.25988	38	4.69169	116	5.38487	160	7.99355	227	0.14767	5	0.384089	10	0.569827	16	5.03e-10	2.05909	up	0.00719511	-1.49071	down	2.46e-13	3.45784	up	--	--	Biological Process: metal ion transport (GO:0030001);; Molecular Function: metal ion binding (GO:0046872);;	--	--	--	--	Heavy-metal-associated domain	--	S	Function unknown	PREDICTED: protein PYRICULARIA ORYZAE RESISTANCE 21-like [Nelumbo nucifera]
Nn1g07499	Nn1g07499	14.9573	472	13.4087	412	14.8835	535	28.7241	865	47.5006	1702	35.5801	1225	2.9769	99	3.29625	102	3.12763	97	1.97e-11	1.48358	up	2.22e-27	-1.78573	down	4.2e-35	3.23169	up	--	--	Cellular Component: integral component of membrane (GO:0016021);;	--	--	--	--	--	--	--	--	PREDICTED: uncharacterized protein LOC104594242 [Nelumbo nucifera]
Nn1g07516	Nn1g07516	17.7085	1150	17.3008	1003	13.727	1006	77.675	4611	89.8232	6399	45.9376	3240	115.641	7688	192.159	11722	123.539	7727	4.46e-18	2.22588	up	1.67e-44	3.54174	up	0.000237597	-1.27192	down	[HT]	Coenzyme transport and metabolism;; Signal transduction mechanisms	Cellular Component: integral component of membrane (GO:0016021);;	K13457|0.0e+00|vvi:100252764|K13457 disease resistance protein RPM1 | (RefSeq) uncharacterized protein sll1770	Plant-pathogen interaction (ko04626)	[R]	General function prediction only	ABC1 family	Protein ACTIVITY OF BC1 COMPLEX KINASE 7, chloroplastic OS=Arabidopsis thaliana OX=3702 GN=ABC1K7 PE=1 SV=1	I	Lipid transport and metabolism	PREDICTED: uncharacterized protein LOC104594255 [Nelumbo nucifera]
Nn1g07555	Nn1g07555	2.33652	185	2.44368	187	1.64917	150	0.645777	49	0.816064	74	0.836949	72	0.090472	8	0.239649	19	0.260188	21	6.38e-06	-1.31454	down	2.11e-12	-2.95336	down	0.00127913	1.56415	up	--	--	Molecular Function: zinc ion binding (GO:0008270);;	K05849|3.2e-124|ini:109158657|K05849 solute carrier family 8 (sodium/calcium exchanger) | (RefSeq) pentatricopeptide repeat-containing protein At3g62890-like	--	[R]	General function prediction only	PPR repeat family	Pentatricopeptide repeat-containing protein At5g48910 OS=Arabidopsis thaliana OX=3702 GN=PCMP-H38 PE=2 SV=1	S	Function unknown	PREDICTED: pentatricopeptide repeat-containing protein At5g66520-like [Nelumbo nucifera]
Nn1g07583	Nn1g07583	13.6669	2310	14.0571	2405	11.8586	2401	4.56801	685	3.64393	638	6.11001	936	1.06387	185	1.00848	158	1.92174	311	1.8e-16	-1.54629	down	1.26e-29	-2.98735	down	1.65e-05	1.4038	up	--	--	Molecular Function: microtubule motor activity (GO:0003777);; Molecular Function: ATP binding (GO:0005524);; Biological Process: microtubule-based movement (GO:0007018);; Molecular Function: microtubule binding (GO:0008017);;	K10406|0.0e+00|nnu:104594308|K10406 kinesin family member C2/C3 | (RefSeq) kinesin-like protein KIN-14F	--	[Z]	Cytoskeleton	Kinesin motor domain	Kinesin-like protein KIN-14F OS=Arabidopsis thaliana OX=3702 GN=KIN14F PE=1 SV=2	Z	Cytoskeleton	PREDICTED: kinesin-like protein KIN-14F [Nelumbo nucifera]
Nn1g07619	Nn1g07619	8.65526	448	4.3995	254	10.2821	616	64.0392	3054	168.702	9776	45.4386	2512	739.536	39880	458.433	23042	173.706	9127	2.76e-07	3.21069	up	6.8e-33	6.11334	up	8.72e-05	-2.4173	down	--	--	Molecular Function: aspartic-type endopeptidase activity (GO:0004190);;	K22683|1.1e-70|nnu:104604031|K22683 aspartyl protease family protein [EC:3.4.23.-] | (RefSeq) aspartyl protease family protein 2-like	--	[O]	Posttranslational modification, protein turnover, chaperones	Xylanase inhibitor N-terminal	Aspartyl protease family protein At5g10770 OS=Arabidopsis thaliana OX=3702 GN=At5g10770 PE=2 SV=1	O	Posttranslational modification, protein turnover, chaperones	PREDICTED: aspartyl protease family protein At5g10770-like [Nelumbo nucifera]
Nn1g07658	Nn1g07658	4.53641	581	6.78425	843	3.81106	559	0.5419	66	0.535941	80	0.676788	90	0.118503	17	0.039614	5	0.068402	10	1.14e-24	-2.93083	down	1.7e-34	-5.42502	down	1.01e-06	2.38531	up	--	--	--	--	--	--	--	--	--	--	--	PREDICTED: uncharacterized protein LOC104594363 isoform X1 [Nelumbo nucifera]
Nn1g07663	Nn1g07663	85.1538	2454	140.809	3645	83.0278	2744	6.00395	166	5.1537	169	6.78621	215	0	0	0	0	0	0	7.17e-58	-3.86164	down	1.81e-30	-11.8618	down	2.4e-19	7.27597	up	--	--	Cellular Component: integral component of membrane (GO:0016021);;	--	--	--	--	--	--	--	--	PREDICTED: uncharacterized protein LOC104594367 [Nelumbo nucifera]
Nn1g07666	Nn1g07666	40.9232	2398	30.4281	1832	33.8553	2256	119.155	6338	216.189	13677	95.7651	5920	231.848	13653	315.801	16736	199.355	11335	1.39e-11	2.03135	up	3.1e-46	3.13849	up	0.00598072	-1.04797	down	--	--	Cellular Component: integral component of membrane (GO:0016021);;	K14209|2.5e-09|han:110909129|K14209 solute carrier family 36 (proton-coupled amino acid transporter) | (RefSeq) amino acid transporter AVT3C-like	--	[E]	Amino acid transport and metabolism	Transmembrane amino acid transporter protein	Probable amino acid permease 7 OS=Arabidopsis thaliana OX=3702 GN=AAP7 PE=2 SV=1	E	Amino acid transport and metabolism	PREDICTED: probable amino acid permease 7 isoform X2 [Nelumbo nucifera]
Nn1g07668	Nn1g07668	3.76981	208	4.94621	257	2.95992	191	6.60325	348	7.72207	494	7.45692	460	1.32149	73	1.05134	58	0.936277	55	1.64e-05	1.04526	up	7.26e-06	-1.36835	down	8.47e-26	2.40399	up	[P]	Inorganic ion transport and metabolism	Cellular Component: vacuolar membrane (GO:0005774);; Molecular Function: calcium:proton antiporter activity (GO:0015369);; Cellular Component: integral component of membrane (GO:0016021);;	K07300|3.0e-213|nnu:104594374|K07300 Ca2+:H+ antiporter | (RefSeq) vacuolar cation/proton exchanger 2-like	--	[P]	Inorganic ion transport and metabolism	Sodium/calcium exchanger protein	Vacuolar cation/proton exchanger 2 OS=Arabidopsis thaliana OX=3702 GN=CAX2 PE=1 SV=2	P	Inorganic ion transport and metabolism	PREDICTED: vacuolar cation/proton exchanger 2-like isoform X4 [Nelumbo nucifera]
Nn1g07697	Nn1g07697	24.7029	2188	21.6903	1862	22.0642	2236	1.7323	145	0.709552	73	2.9658	285	0.080429	8	0.03489	4	0.023158	3	2.77e-17	-3.37681	down	1.28e-99	-8.13396	down	6.19e-11	4.22045	up	[O]	Posttranslational modification, protein turnover, chaperones	Molecular Function: serine-type endopeptidase activity (GO:0004252);;	K15333|8.0e-76|nsy:104224633|K15333 tRNA guanosine-2'-O-methyltransferase [EC:2.1.1.34] | (RefSeq) uncharacterized protein LOC104224633	--	--	--	Subtilase family	Subtilisin-like protease SBT5.4 OS=Arabidopsis thaliana OX=3702 GN=SBT5.4 PE=1 SV=1	O	Posttranslational modification, protein turnover, chaperones	PREDICTED: subtilisin-like protease SBT5.4 [Nelumbo nucifera]
Nn1g07734	Nn1g07734	12.5894	1952	12.2061	1884	11.2886	2038	4.35064	653	3.20271	568	6.38749	1099	0.346358	57	0.275672	44	0.398437	61	2.38e-06	-1.2242	down	7.7e-161	-4.71655	down	1.8e-24	3.39019	up	--	--	--	K14856|1.7e-10|mus:103973255|K14856 protein SDA1 | (RefSeq) protein SDA1 homolog	--	--	--	--	--	--	--	PREDICTED: uncharacterized protein LOC104588681 isoform X1 [Nelumbo nucifera]
Nn1g07773	Nn1g07773	7.96301	322	15.2882	572	3.30808	167	213.7	6131	65.9271	2366	131.173	6348	1.6847	66	0.788017	32	0.927614	32	7.13e-08	3.4012	up	9.24e-06	-2.54982	down	1.42e-38	6.15152	up	[O]	Posttranslational modification, protein turnover, chaperones	Biological Process: response to reactive oxygen species (GO:0000302);; Cellular Component: cellular_component (GO:0005575);; Cellular Component: intracellular (GO:0005622);; Cellular Component: cell (GO:0005623);; Cellular Component: cytoplasm (GO:0005737);; Biological Process: response to stress (GO:0006950);; Biological Process: response to oxidative stress (GO:0006979);; Biological Process: bi…	K13993|4.9e-79|nnu:104585845|K13993 HSP20 family protein | (RefSeq) 18.2 kDa class I heat shock protein-like	Protein processing in endoplasmic reticulum (ko04141)	[O]	Posttranslational modification, protein turnover, chaperones	Hsp20/alpha crystallin family	18.2 kDa class I heat shock protein OS=Medicago sativa OX=3879 GN=HSP18.2 PE=2 SV=1	O	Posttranslational modification, protein turnover, chaperones	PREDICTED: 18.2 kDa class I heat shock protein-like [Nelumbo nucifera]
Nn1g07780	Nn1g07780	32.4105	2204	24.3796	1615	26.1903	2008	63.2424	4098	76.042	6126	56.6114	3535	222.593	13026	227.688	14846	131.003	8935	4.69e-09	1.31949	up	1.94e-33	3.10894	up	2.1e-08	-1.76168	down	[HT]	Coenzyme transport and metabolism;; Signal transduction mechanisms	Molecular Function: protein kinase activity (GO:0004672);; Molecular Function: ATP binding (GO:0005524);;	K08869|0.0e+00|nnu:104585840|K08869 aarF domain-containing kinase | (RefSeq) uncharacterized protein sll0005	--	[R]	General function prediction only	ABC1 family	Protein ACTIVITY OF BC1 COMPLEX KINASE 3, chloroplastic OS=Arabidopsis thaliana OX=3702 GN=ABC1K3 PE=1 SV=1	--	--	PREDICTED: uncharacterized protein LOC104585840 [Nelumbo nucifera]
Nn1g07781	Nn1g07781	56.936	1468	56.41	1405	48.1547	1426	24.2433	593	20.9187	615	26.444	743	10.1987	281	6.34065	158	9.49862	248	1.44e-12	-1.03949	down	9.75e-21	-2.19189	down	2.74e-05	1.13051	up	--	--	Molecular Function: nucleic acid binding (GO:0003676);;	K14525|5.6e-42|dosa:Os04t0428950-00|K14525 ribonucleases P/MRP protein subunit RPP25 [EC:3.1.26.5] | (RefSeq) Os04g0428950; Similar to Ribonuclease P.	Ribosome biogenesis in eukaryotes (ko03008);; RNA transport (ko03013)	[S]	Function unknown	Alba	--	S	Function unknown	PREDICTED: ribonuclease P protein subunit p25-like protein [Nelumbo nucifera]
Nn1g07801	Nn1g07801	12.9142	1016	11.018	839	12.6019	1162	28.2592	2103	33.3709	2975	20.8639	1829	84.4807	7014	102.332	7835	92.8028	7549	2.68e-10	1.2857	up	1.53e-151	3.3522	up	5.19e-20	-2.04485	down	[S]	Function unknown	Molecular Function: glucosylceramidase activity (GO:0004348);; Biological Process: glucosylceramide catabolic process (GO:0006680);; Cellular Component: membrane (GO:0016020);;	K17108|0.0e+00|nnu:104585820|K17108 non-lysosomal glucosylceramidase [EC:3.2.1.45] | (RefSeq) non-lysosomal glucosylceramidase	Other glycan degradation (ko00511);; Sphingolipid metabolism (ko00600)	[G]	Carbohydrate transport and metabolism	Glycosyl-hydrolase family 116, catalytic region	--	G	Carbohydrate transport and metabolism	PREDICTED: non-lysosomal glucosylceramidase isoform X1 [Nelumbo nucifera]
Nn1g07821	Nn1g07821	22.203	215	23.262	219	11.2217	125	3.4288	32	4.50504	50	8.34132	88	0.543937	6	1.77588	17	1.25417	13	0.000502433	-1.57589	down	1.38e-11	-3.43775	down	0.00569478	1.69777	up	--	--	--	--	--	--	--	Wound-induced protein	--	S	Function unknown	PREDICTED: uncharacterized protein LOC104585806 [Nelumbo nucifera]
Nn1g07841	Nn1g07841	10.9196	737	17.3673	1047	10.1655	809	3.1878	168	1.41209	107	3.09095	242	0.058303	5	0	0	0.226392	19	2.42e-10	-2.16574	down	2.5e-07	-5.57876	down	1.59e-05	3.4515	up	--	--	--	--	--	--	--	--	--	--	--	PREDICTED: glycine-rich protein 23-like [Nelumbo nucifera]
Nn1g07848	Nn1g07848	37.0771	2875	37.3758	2656	38.1901	3337	16.274	1155	17.1953	1431	16.2152	1304	4.8689	377	6.598	459	6.70874	489	2.26e-34	-1.0852	down	2.55e-56	-2.27865	down	2.35e-12	1.17851	up	--	--	Molecular Function: cyclin-dependent protein serine/threonine kinase inhibitor activity (GO:0004861);; Cellular Component: nucleus (GO:0005634);; Biological Process: cell cycle arrest (GO:0007050);; Molecular Function: kinase activity (GO:0016301);;	--	--	--	--	--	Cyclin-dependent kinase inhibitor 3 OS=Arabidopsis thaliana OX=3702 GN=KRP3 PE=1 SV=1	S	Function unknown	PREDICTED: cyclin-dependent kinase inhibitor 5 [Nelumbo nucifera]
Nn1g07854	Nn1g07854	7.71963	1168	8.18011	1195	5.66782	983	0.770467	114	0.768272	133	0.8762	147	0.081044	14	0.11981	19	0.088778	15	5.8e-48	-2.96813	down	9.82e-75	-5.62882	down	1.91e-14	2.59785	up	[M]	Cell wall/membrane/envelope biogenesis	Molecular Function: protein kinase activity (GO:0004672);; Molecular Function: ATP binding (GO:0005524);;	K06228|0.0e+00|nnu:104589384|K06228 fused [EC:2.7.11.1] | (RefSeq) serine/threonine-protein kinase TIO	--	--	--	Protein kinase domain	Serine/threonine-protein kinase TIO OS=Arabidopsis thaliana OX=3702 GN=TIO PE=1 SV=1	T	Signal transduction mechanisms	PREDICTED: serine/threonine-protein kinase TIO [Nelumbo nucifera]
Nn1g07912	Nn1g07912	0.393428	46	0.437394	49	0.540678	71	0.841256	93	2.17788	286	1.3112	164	0.01211	2	0	0	0.038865	5	5.59e-05	1.70083	up	5.13e-08	-3.90829	down	4.73e-15	5.19989	up	[T]	Signal transduction mechanisms	Molecular Function: protein serine/threonine kinase activity (GO:0004674);; Molecular Function: ATP binding (GO:0005524);; Cellular Component: integral component of membrane (GO:0016021);;	K20181|1.1e-100|mtr:MTR_5g026090|K20181 vacuolar protein sorting-associated protein 18 | (RefSeq) vacuolar sorting-associated-like protein	--	--	--	Leucine rich repeat	Probable LRR receptor-like serine/threonine-protein kinase At3g47570 OS=Arabidopsis thaliana OX=3702 GN=At3g47570 PE=2 SV=1	T	Signal transduction mechanisms	PREDICTED: probable LRR receptor-like serine/threonine-protein kinase At3g47570 [Nelumbo nucifera]
Nn1g07918	Nn1g07918	34.9994	1607	45.0732	2063	34.934	1862	14.9058	616	21.6378	1162	15.2272	773	2.99569	151	2.01749	93	4.03588	172	3.72e-05	-1.02773	down	3.64e-35	-3.27695	down	3.83e-12	2.19377	up	--	--	Biological Process: male meiotic nuclear division (GO:0007140);; Biological Process: female meiotic nuclear division (GO:0007143);;	--	--	--	--	--	--	S	Function unknown	PREDICTED: protein XRI1 [Nelumbo nucifera]
Nn1g07985	Nn1g07985	120.349	6082	106.927	5239	67.9779	3939	17.6278	847	19.2018	1102	20.5984	1133	1.15089	62	4.99137	244	3.83665	199	6.47e-23	-2.20165	down	1.1e-19	-4.37335	down	9.32e-06	2.11874	up	--	--	Molecular Function: fatty acid binding (GO:0005504);; Biological Process: systemic acquired resistance (GO:0009627);;	--	--	--	--	Probable lipid transfer	Putative lipid-transfer protein DIR1 OS=Arabidopsis thaliana OX=3702 GN=DIR1 PE=1 SV=1	S	Function unknown	hypothetical protein AQUCO_03400035v1 [Aquilegia coerulea]
Nn1g08106	Nn1g08106	6.28318	965	6.49249	967	5.72241	1009	1.33103	195	1.07238	188	1.60553	270	0.199769	34	0.42912	65	0.371839	59	2.62e-28	-2.05588	down	5.77e-45	-3.73907	down	5.86e-06	1.63257	up	--	--	Molecular Function: microtubule motor activity (GO:0003777);; Molecular Function: ATP binding (GO:0005524);; Biological Process: microtubule-based movement (GO:0007018);; Molecular Function: microtubule binding (GO:0008017);;	K10400|0.0e+00|nnu:104589895|K10400 kinesin family member 15 | (RefSeq) kinesin-like protein KIN-12B	--	[Z]	Cytoskeleton	Kinesin motor domain	Kinesin-like protein KIN-12B OS=Arabidopsis thaliana OX=3702 GN=KIN12B PE=1 SV=1	Z	Cytoskeleton	PREDICTED: kinesin-like protein KIN-12B [Nelumbo nucifera]
Nn1g08158	Nn1g08158	32.0174	431	28.6353	374	34.4618	532	12.2996	158	7.44049	114	13.0484	192	0	0	0	0	0	0	7.64e-08	-1.38417	down	2.98e-17	-9.48622	down	4.27e-17	6.98717	up	--	--	Cellular Component: integral component of membrane (GO:0016021);;	--	--	--	--	Rapid ALkalinization Factor (RALF)	--	S	Function unknown	PREDICTED: protein RALF-like 32 [Nelumbo nucifera]
Nn1g08159	Nn1g08159	86.2433	5094	73.5027	4209	82.4215	5581	264.304	14829	157.907	10588	228.956	14714	246.15	15459	338.154	19286	574.158	34664	2.44e-14	1.5348	up	1.54e-18	2.64831	up	0.00301222	-1.09741	down	--	--	Molecular Function: molecular_function (GO:0003674);; Molecular Function: receptor binding (GO:0005102);; Molecular Function: hormone activity (GO:0005179);; Molecular Function: binding (GO:0005488);; Molecular Function: protein binding (GO:0005515);; Cellular Component: cellular_component (GO:0005575);; Cellular Component: extracellular region (GO:0005576);; Cellular Component: cell-cell junctio…	--	--	--	--	--	--	S	Function unknown	PREDICTED: protein RALF-like 32 [Nelumbo nucifera]
Nn1g08185	Nn1g08185	163.819	2606	138.535	2137	133.685	2438	40.2405	608	21.279	385	47.2678	819	7.29654	124	5.09275	79	11.6443	190	8.59e-11	-1.83686	down	2.91e-36	-3.72131	down	2.81e-05	1.79199	up	[J]	Translation, ribosomal structure and biogenesis	Molecular Function: RNA binding (GO:0003723);;	K12741|8.9e-35|egr:104419421|K12741 heterogeneous nuclear ribonucleoprotein A1/A3 | (RefSeq) glycine-rich RNA-binding protein 4, mitochondrial	Spliceosome (ko03040)	[R]	General function prediction only	RNA recognition motif. (a.k.a. RRM, RBD, or RNP domain)	Glycine-rich RNA-binding protein 2, mitochondrial OS=Arabidopsis thaliana OX=3702 GN=RBG2 PE=1 SV=1	A	RNA processing and modification	PREDICTED: glycine-rich RNA-binding protein 2, mitochondrial-like [Nelumbo nucifera]
Nn1g08203	Nn1g08203	24.2058	1172	25.3291	1188	25.9217	1438	73.5539	3379	53.8827	2959	57.809	3041	152.929	7862	156.1	7286	93.4262	4617	8.29e-19	1.40847	up	1.63e-28	2.82956	up	1.32e-06	-1.41019	down	--	--	Molecular Function: transferase activity, transferring acyl groups other than amino-acyl groups (GO:0016747);;	K13065|2.0e-21|gra:105776825|K13065 shikimate O-hydroxycinnamoyltransferase [EC:2.3.1.133] | (RefSeq) shikimate O-hydroxycinnamoyltransferase-like	Phenylpropanoid biosynthesis (ko00940);; Flavonoid biosynthesis (ko00941);; Stilbenoid, diarylheptanoid and gingerol biosynthesis (ko00945)	--	--	Transferase family	Protein ECERIFERUM 26 OS=Arabidopsis thaliana OX=3702 GN=CER26 PE=2 SV=1	S	Function unknown	PREDICTED: protein ECERIFERUM 26-like [Nelumbo nucifera]
Nn1g08245	Nn1g08245	115.063	1389	133.516	1580	98.5534	1348	6.3959	79	10.0959	145	12.0765	167	0.428414	6	0.740821	11	3.78745	50	5.53e-39	-3.33466	down	1.34e-18	-5.39553	down	0.00713657	1.93541	up	--	--	Molecular Function: fatty acid binding (GO:0005504);; Biological Process: systemic acquired resistance (GO:0009627);;	--	--	--	--	Probable lipid transfer	--	S	Function unknown	putative lipid-transfer protein DIR1 [Hevea brasiliensis]
Nn1g08247	Nn1g08247	458.14	6116	418.721	5376	431.517	6569	74.1234	872	75.1395	1150	79.0813	1150	4.55083	62	9.91979	123	14.9615	200	2.67e-139	-2.40718	down	1.28e-41	-5.03621	down	1.39e-10	2.58216	up	--	--	Molecular Function: fatty acid binding (GO:0005504);; Biological Process: systemic acquired resistance (GO:0009627);;	--	--	--	--	Probable lipid transfer	Putative lipid-transfer protein DIR1 OS=Arabidopsis thaliana OX=3702 GN=DIR1 PE=1 SV=1	S	Function unknown	hypothetical protein AQUCO_03400035v1 [Aquilegia coerulea]
Nn1g08279	Nn1g08279	4.01349	471	3.43176	393	3.88518	518	0.483316	60	0.266204	39	0.523504	74	0.135687	19	0.128547	16	0.052631	7	8.8e-26	-2.82454	down	5.69e-44	-4.52858	down	0.00617905	1.56512	up	[T]	Signal transduction mechanisms	Molecular Function: protein kinase activity (GO:0004672);; Molecular Function: ATP binding (GO:0005524);;	K02214|0.0e+00|nnu:104587975|K02214 cell division control protein 7 [EC:2.7.11.1] | (RefSeq) uncharacterized LOC104587975	--	[L]	Replication, recombination and repair	Protein kinase domain	Cell division control protein 2 homolog A OS=Antirrhinum majus OX=4151 GN=CDC2A PE=2 SV=2	T	Signal transduction mechanisms	PREDICTED: uncharacterized protein LOC104587975 isoform X2 [Nelumbo nucifera]
Nn1g08281	Nn1g08281	11.9623	511	35.9226	1510	17.3626	878	382.406	15646	330.433	16247	581.076	27478	0.096084	7	0.105597	7	0.04303	3	5.01e-27	4.21154	up	1.1e-31	-6.75642	down	1.51e-152	10.881	up	[K]	Transcription	Molecular Function: O-methyltransferase activity (GO:0008171);; Biological Process: methylation (GO:0032259);; Molecular Function: protein dimerization activity (GO:0046983);;	K13383|1.6e-145|nnu:104587969|K13383 (RS)-norcoclaurine 6-O-methyltransferase [EC:2.1.1.128] | (RefSeq) (RS)-norcoclaurine 6-O-methyltransferase-like	Isoquinoline alkaloid biosynthesis (ko00950)	[R]	General function prediction only	O-methyltransferase domain	(RS)-norcoclaurine 6-O-methyltransferase OS=Coptis japonica OX=3442 PE=1 SV=1	J	Translation, ribosomal structure and biogenesis	PREDICTED: (RS)-norcoclaurine 6-O-methyltransferase-like [Nelumbo nucifera]
Nn1g08287	Nn1g08287	3.07011	120	8.13231	308	4.85478	218	69.067	2549	52.6946	2339	105.566	4465	0.598312	26	1.27325	49	1.35701	55	1.35e-23	3.76242	up	0.000229163	-1.83906	down	5.71e-52	5.61332	up	[K]	Transcription	Molecular Function: O-methyltransferase activity (GO:0008171);; Biological Process: methylation (GO:0032259);; Molecular Function: protein dimerization activity (GO:0046983);;	K13383|3.2e-159|nnu:104590844|K13383 (RS)-norcoclaurine 6-O-methyltransferase [EC:2.1.1.128] | (RefSeq) (RS)-norcoclaurine 6-O-methyltransferase-like	Isoquinoline alkaloid biosynthesis (ko00950)	[R]	General function prediction only	O-methyltransferase domain	(RS)-norcoclaurine 6-O-methyltransferase OS=Thalictrum flavum subsp. glaucum OX=150095 PE=1 SV=1	J	Translation, ribosomal structure and biogenesis	norcoclaurine 6-O-methyltransferase 3 [Nelumbo nucifera]
Nn1g08305	Nn1g08305	0.225655	20	0.255154	16	0.147089	12	1.24231	110	0.933371	102	0.335893	33	6.51777	694	7.30638	705	4.78327	486	0.000136277	2.22401	up	8.37e-61	5.68551	up	4.56e-11	-3.1233	down	--	--	Molecular Function: protein dimerization activity (GO:0046983);;	--	--	--	--	--	--	K	Transcription	PREDICTED: transcription factor IBH1 [Nelumbo nucifera]
Nn1g08319	Nn1g08319	0.949231	136	0.987499	126	1.37774	202	0.347447	45	0.284648	50	0.310605	53	0.134731	14	0.022607	9	0.023236	4	6.22e-08	-1.50297	down	1.08e-14	-3.55541	down	0.000389511	1.9474	up	--	--	--	--	--	--	--	--	--	--	--	PREDICTED: uncharacterized protein LOC104590675 isoform X2 [Nelumbo nucifera]
Nn1g08378	Nn1g08378	6.17201	381	9.83271	582	5.24741	371	0.763731	43	0.56909	41	0.548213	34	0	0	0	0	0	0	5.16e-23	-3.30621	down	1.02e-16	-9.44078	down	9.2e-09	5.30894	up	--	--	Biological Process: reproduction (GO:0000003);; Biological Process: microtubule cytoskeleton organization (GO:0000226);; Biological Process: developmental process involved in reproduction (GO:0003006);; Cellular Component: cellular_component (GO:0005575);; Cellular Component: intracellular (GO:0005622);; Cellular Component: cell (GO:0005623);; Cellular Component: nucleus (GO:0005634);; Cellular C…	K13172|1.6e-37|cmos:111450450|K13172 serine/arginine repetitive matrix protein 2 | (RefSeq) uncharacterized protein LOC111450450 isoform X1	--	--	--	QWRF family	Protein ENDOSPERM DEFECTIVE 1 OS=Arabidopsis thaliana OX=3702 GN=EDE1 PE=1 SV=1	S	Function unknown	PREDICTED: protein ENDOSPERM DEFECTIVE 1-like isoform X1 [Nelumbo nucifera]
Nn1g08393	Nn1g08393	2.48825	48	2.50698	47	2.99886	66	7.40824	135	5.33591	116	7.45088	156	10.7398	219	12.4269	230	11.172	219	9.2e-07	1.41801	up	2.21e-30	2.50512	up	8.37e-06	-1.06313	down	--	--	--	K00817|1.7e-11|lang:109325818|K00817 histidinol-phosphate aminotransferase [EC:2.6.1.9] | (RefSeq) histidinol-phosphate aminotransferase, chloroplastic	Histidine metabolism (ko00340);; Tyrosine metabolism (ko00350);; Phenylalanine metabolism (ko00360);; Phenylalanine, tyrosine and tryptophan biosynthesis (ko00400);; Tropane, piperidine and pyridine alkaloid biosynthesis (ko00960);; Biosynthesis of amino acids (ko01230)	--	--	--	--	--	--	PREDICTED: uncharacterized protein LOC104596769 [Nelumbo nucifera]
Nn1g08398	Nn1g08398	2.86052	182	3.418	193	2.2214	161	0.473912	31	0.544433	39	0.735632	45	0.037872	3	0.028163	2	0.069055	5	9.39e-13	-2.08782	down	2.15e-22	-5.15979	down	2.97e-06	2.87628	up	[QV]	Secondary metabolites biosynthesis, transport and catabolism;; Defense mechanisms	Molecular Function: monooxygenase activity (GO:0004497);; Molecular Function: iron ion binding (GO:0005506);; Molecular Function: oxidoreductase activity, acting on paired donors, with incorporation or reduction of molecular oxygen (GO:0016705);; Molecular Function: heme binding (GO:0020037);;	K12639|2.5e-278|nnu:104608289|K12639 cytochrome P450 family 724 subfamily B polypeptide 1 [EC:1.14.13.-] | (RefSeq) cytochrome P450 724B1-like	Brassinosteroid biosynthesis (ko00905)	[QI]	Secondary metabolites biosynthesis, transport and catabolism;; Lipid transport and metabolism	Cytochrome P450	Cytochrome P450 724B1 OS=Oryza sativa subsp. japonica OX=39947 GN=CYP724B1 PE=1 SV=1	Q	Secondary metabolites biosynthesis, transport and catabolism	PREDICTED: cytochrome P450 724B1-like [Nelumbo nucifera]
Nn1g08438	Nn1g08438	9.84424	1106	10.1584	1097	8.96935	1196	0.422016	51	0.362502	50	0.57083	79	0.036875	5	0.056994	7	0.060529	8	5.58e-93	-4.09549	down	1.36e-86	-6.87424	down	3.08e-07	2.63522	up	[G]	Carbohydrate transport and metabolism	Molecular Function: transferase activity, transferring glycosyl groups (GO:0016757);;	K06617|0.0e+00|nnu:104608278|K06617 raffinose synthase [EC:2.4.1.82] | (RefSeq) probable galactinol--sucrose galactosyltransferase 1	Galactose metabolism (ko00052)	--	--	Raffinose synthase or seed imbibition protein Sip1	Probable galactinol--sucrose galactosyltransferase 1 OS=Arabidopsis thaliana OX=3702 GN=RFS1 PE=2 SV=1	S	Function unknown	PREDICTED: probable galactinol--sucrose galactosyltransferase 1 [Nelumbo nucifera]
Nn1g08439	Nn1g08439	4.02013	316	4.03056	304	3.71061	332	16.3704	1199	15.73	1340	15.7463	1296	0.970404	75	2.0852	151	1.46599	96	1.43e-73	2.10158	up	0.0011314	-1.08817	down	1.23e-24	3.13238	up	--	--	--	--	--	--	--	--	--	--	--	PREDICTED: uncharacterized protein LOC104608279 isoform X3 [Nelumbo nucifera]
Nn1g08512	Nn1g08512	12.995	1234	11.1092	1012	11.4335	1237	32.6783	2931	44.4558	4771	37.299	3839	97.7672	9890	65.0499	6004	63.6094	6269	5.73e-30	1.80452	up	1.92e-39	3.11019	up	2.63e-06	-1.29812	down	[T]	Signal transduction mechanisms	Molecular Function: voltage-gated potassium channel activity (GO:0005249);; Cellular Component: integral component of membrane (GO:0016021);; Biological Process: regulation of ion transmembrane transport (GO:0034765);;	K21867|0.0e+00|nnu:104612056|K21867 potassium channel | (RefSeq) potassium channel AKT2/3-like	--	[PT]	Inorganic ion transport and metabolism;; Signal transduction mechanisms	Ion transport protein	Potassium channel AKT2/3 OS=Arabidopsis thaliana OX=3702 GN=AKT2 PE=1 SV=1	--	--	PREDICTED: potassium channel AKT2/3-like [Nelumbo nucifera]
Nn1g08650	Nn1g08650	6.63587	483	5.75355	394	6.49965	557	33.6949	2274	27.2386	2157	20.5395	1644	60.4881	4451	70.2769	4795	51.1691	3783	3.21e-26	2.17903	up	8.97e-94	3.6426	up	1.07e-08	-1.43744	down	--	--	Biological Process: lipid catabolic process (GO:0016042);; Molecular Function: hydrolase activity (GO:0016787);;	--	--	[U]	Intracellular trafficking, secretion, and vesicular transport	--	--	I	Lipid transport and metabolism	PREDICTED: uncharacterized protein LOC104590906 [Nelumbo nucifera]
Nn1g08752	Nn1g08752	65.4751	2409	49.9435	1834	51.6241	2299	12.1268	427	10.0442	432	15.2351	660	0.368286	15	0.017468	2	0.158308	10	2.44e-23	-1.98499	down	1.14e-96	-7.37725	down	1.07e-28	5.17114	up	--	--	--	--	--	--	--	Universal stress protein family	--	S	Function unknown	PREDICTED: uncharacterized protein LOC104609637 [Nelumbo nucifera]
Nn1g08777	Nn1g08777	11.8301	644	13.1513	680	8.96171	556	2.71448	138	2.86851	178	2.68777	160	1.0879	63	0.701422	39	0.939839	53	4.12e-19	-1.87676	down	3.1e-31	-3.14188	down	1.36e-05	1.23185	up	--	--	Cellular Component: Ndc80 complex (GO:0031262);;	K11548|2.0e-133|nnu:104587828|K11548 kinetochore protein Nuf2 | (RefSeq) kinetochore protein nuf2	--	[D]	Cell cycle control, cell division, chromosome partitioning	Nuf2 family	Kinetochore protein NUF2 homolog OS=Arabidopsis thaliana OX=3702 GN=NUF2 PE=1 SV=1	D	Cell cycle control, cell division, chromosome partitioning	PREDICTED: kinetochore protein nuf2 [Nelumbo nucifera]
Nn1g08785	Nn1g08785	7.5544	615	6.74008	529	6.84382	637	13.8831	1071	12.1608	1119	13.0272	1142	24.3554	2097	22.1461	1727	18.7066	1490	3.88e-18	1.00446	up	2.72e-27	2.03095	up	5.14e-07	-1.0288	down	[J]	Translation, ribosomal structure and biogenesis	--	--	--	--	--	Polyketide cyclase / dehydrase and lipid transport	--	S	Function unknown	PREDICTED: uncharacterized protein LOC104587826 [Nelumbo nucifera]
Nn1g08860	Nn1g08860	10.5125	798	9.35419	688	10.0562	888	4.02732	293	2.33324	211	3.4797	291	0.183378	13	0.535866	38	0.422855	35	1.94e-11	-1.44167	down	4.45e-34	-4.27291	down	1.11e-09	2.72756	up	--	--	--	K03029|1.1e-23|lang:109332961|K03029 26S proteasome regulatory subunit N10 | (RefSeq) 26S proteasome non-ATPase regulatory subunit 4 homolog	Proteasome (ko03050)	--	--	Protein of unknown function (DUF632)	Protein ALTERED PHOSPHATE STARVATION RESPONSE 1 OS=Arabidopsis thaliana OX=3702 GN=APSR1 PE=2 SV=1	S	Function unknown	PREDICTED: uncharacterized protein LOC104605784 [Nelumbo nucifera]
Nn1g08868	Nn1g08868	15.0355	826	19.8764	1058	14.5505	915	175.818	9162	176.231	10975	121.736	7278	759.532	44306	707.369	37524	389.06	21832	1.61e-52	3.33623	up	7.04e-70	5.6093	up	3.09e-11	-2.23195	down	[C]	Energy production and conversion	Biological Process: cellular aldehyde metabolic process (GO:0006081);; Molecular Function: oxidoreductase activity, acting on the aldehyde or oxo group of donors, NAD or NADP as acceptor (GO:0016620);;	K00128|3.0e-241|nnu:104605787|K00128 aldehyde dehydrogenase (NAD+) [EC:1.2.1.3] | (RefSeq) aldehyde dehydrogenase family 3 member H1-like	Glycolysis / Gluconeogenesis (ko00010);; Ascorbate and aldarate metabolism (ko00053);; Fatty acid degradation (ko00071);; Valine, leucine and isoleucine degradation (ko00280);; Lysine degradation (ko00310);; Arginine and proline metabolism (ko00330);; Histidine metabolism (ko00340);; Tryptophan metabolism (ko00380);; beta-Alanine metabolism (ko00410);; Glycerolipid metabolism (ko00561);; Pyruvate…	[C]	Energy production and conversion	Aldehyde dehydrogenase family	Aldehyde dehydrogenase family 3 member I1, chloroplastic OS=Arabidopsis thaliana OX=3702 GN=ALDH3I1 PE=1 SV=2	C	Energy production and conversion	PREDICTED: aldehyde dehydrogenase family 3 member H1-like [Nelumbo nucifera]
Nn1g08874	Nn1g08874	10.9089	363	12.2132	395	17.8337	679	23.4733	743	50.0138	1879	18.9863	687	183.266	6483	78.3133	2498	39.7039	1352	0.0020108	1.24548	up	2.14e-09	3.23689	up	0.00185691	-1.87845	down	--	--	Molecular Function: DNA binding (GO:0003677);; Cellular Component: nucleus (GO:0005634);; Biological Process: regulation of transcription, DNA-templated (GO:0006355);;	K00521|2.9e-43|cmos:111447866|K00521 ferric-chelate reductase [EC:1.16.1.7] | (RefSeq) ferric reduction oxidase 7, chloroplastic-like	--	--	--	No apical meristem (NAM) protein	NAC domain-containing protein 2 OS=Arabidopsis thaliana OX=3702 GN=NAC002 PE=1 SV=2	K	Transcription	PREDICTED: NAC domain-containing protein 2-like [Nelumbo nucifera]
Nn1g08923	Nn1g08923	17.3524	625	20.2139	705	12.4224	529	2.3844	88	1.52998	68	2.86036	117	0	0	0	0	0	0	1.56e-19	-2.61808	down	5.18e-19	-9.89002	down	2.82e-13	6.32303	up	[G]	Carbohydrate transport and metabolism	Biological Process: carbohydrate metabolic process (GO:0005975);; Biological Process: pentose-phosphate shunt (GO:0006098);; Molecular Function: 6-phosphogluconolactonase activity (GO:0017057);;	K01057|4.2e-41|nnu:104605808|K01057 6-phosphogluconolactonase [EC:3.1.1.31] | (RefSeq) probable 6-phosphogluconolactonase 1	Pentose phosphate pathway (ko00030);; Carbon metabolism (ko01200)	[G]	Carbohydrate transport and metabolism	Glucosamine-6-phosphate isomerases/6-phosphogluconolactonase	Probable 6-phosphogluconolactonase 2 OS=Arabidopsis thaliana OX=3702 GN=PGL2 PE=2 SV=2	G	Carbohydrate transport and metabolism	PREDICTED: probable 6-phosphogluconolactonase 1 isoform X2 [Nelumbo nucifera]
Nn1g08944	Nn1g08944	18.7323	321	19.9268	331	17.7698	349	28.823	469	50.657	986	29.0983	543	3.40891	63	5.48147	91	2.02829	36	0.00023941	1.05142	up	7.46e-07	-1.90274	down	3.73e-11	2.86761	up	--	--	Molecular Function: calcium ion binding (GO:0005509);;	K13448|3.3e-83|nnu:104605851|K13448 calcium-binding protein CML | (RefSeq) probable calcium-binding protein CML44	Plant-pathogen interaction (ko04626)	[T]	Signal transduction mechanisms	EF hand	Probable calcium-binding protein CML44 OS=Arabidopsis thaliana OX=3702 GN=CML44 PE=2 SV=2	T	Signal transduction mechanisms	PREDICTED: probable calcium-binding protein CML44 [Nelumbo nucifera]
Nn1g08949	Nn1g08949	125.927	11371	129.363	10425	100.306	9619	53.0822	4054	57.0598	5515	57.844	5096	6.62309	607	7.49807	611	6.34459	556	5.27e-11	-1.01006	down	7.8e-102	-3.68768	down	4.4e-77	2.65985	up	[M]	Cell wall/membrane/envelope biogenesis	Molecular Function: protein kinase activity (GO:0004672);; Molecular Function: ATP binding (GO:0005524);;	K13430|7.8e-100|nta:107764193|K13430 serine/threonine-protein kinase PBS1 [EC:2.7.11.1] | (RefSeq) serine/threonine-protein kinase PBS1-like	Plant-pathogen interaction (ko04626)	--	--	Protein kinase domain	Receptor-like serine/threonine-protein kinase ALE2 OS=Arabidopsis thaliana OX=3702 GN=ALE2 PE=1 SV=1	T	Signal transduction mechanisms	PREDICTED: probable receptor-like serine/threonine-protein kinase At5g57670 [Nelumbo nucifera]
Nn1g08955	Nn1g08955	3.9097	96	3.78519	88	5.21209	146	754.882	15771	670.261	17241	421.021	10023	2716.25	63387	2728.95	59567	2443.45	53974	1.82e-158	7.00797	up	0	9.50454	up	7.05e-18	-2.35646	down	--	--	--	K09264|9.2e-06|nnu:104605842|K09264 MADS-box transcription factor, plant | (RefSeq) PI; floral homeotic protein PMADS 2	--	--	--	--	--	--	--	--
Nn1g09008	Nn1g09008	0.294353	3	0.889169	9	0.456837	5	9.04453	81	13.4621	143	5.35396	55	21.3175	212	19.232	174	20.6669	198	1.51e-10	3.68249	up	3.94e-38	5.45464	up	0.000419969	-1.39142	down	--	--	--	--	--	--	--	--	--	--	--	PREDICTED: uncharacterized protein LOC104612109 [Nelumbo nucifera]
Nn1g09015	Nn1g09015	21.8098	1587	20.0506	1479	18.7851	1658	62.4655	5054	35.4042	3485	43.8653	3862	146.379	13169	86.2892	7173	69.4893	6406	2.29e-11	1.49314	up	6.33e-22	2.93132	up	0.000179818	-1.40846	down	--	--	Molecular Function: transcription factor activity, sequence-specific DNA binding (GO:0003700);;	--	--	--	--	TCP family transcription factor	Transcription factor TCP4 OS=Arabidopsis thaliana OX=3702 GN=TCP4 PE=1 SV=1	K	Transcription	PREDICTED: transcription factor TCP4 [Nelumbo nucifera]
Nn1g09033	Nn1g09033	0.354948	28	0.026024	2	0.048487	5	3.14683	230	7.61163	663	1.05465	88	11.8285	964	20.1223	1490	6.03786	473	0.000235622	3.32405	up	1.21e-17	6.4775	up	0.0087716	-1.79035	down	--	--	Molecular Function: calcium ion binding (GO:0005509);; Cellular Component: integral component of membrane (GO:0016021);; Biological Process: transmembrane transport (GO:0055085);;	--	--	--	--	EF-hand domain pair	Sodium/calcium exchanger NCL OS=Arabidopsis thaliana OX=3702 GN=NCL PE=2 SV=1	S	Function unknown	PREDICTED: uncharacterized protein LOC104612096 [Nelumbo nucifera]
Nn1g09041	Nn1g09041	0	0	0.32703	11	0.743565	29	3.40144	108	1.82565	70	2.57195	94	15.7227	558	8.11241	262	14.5193	495	0.00365206	2.33677	up	4.28e-05	4.74719	up	2.11e-11	-2.5267	down	--	--	--	--	--	--	--	--	--	--	--	PREDICTED: uncharacterized protein LOC104612109 [Nelumbo nucifera]
Nn1g09057	Nn1g09057	10.1656	458	10.245	464	6.5307	369	147.408	6089	195.022	9899	89.1004	4210	514.124	24075	434.361	18774	328.284	14714	1.21e-37	3.93534	up	3e-107	5.88304	up	5.58e-07	-1.83205	down	--	--	Molecular Function: molecular_function (GO:0003674);; Molecular Function: catalytic activity (GO:0003824);; Cellular Component: cellular_component (GO:0005575);; Cellular Component: intracellular (GO:0005622);; Cellular Component: cell (GO:0005623);; Cellular Component: cytoplasm (GO:0005737);; Cellular Component: vacuole (GO:0005773);; Cellular Component: Golgi apparatus (GO:0005794);; Cellular …	K23877|4.3e-23|cam:101490664|K23877 xyloglucan O-acetyltransferase | (RefSeq) protein ALTERED XYLOGLUCAN 4-like	--	--	--	PMR5 N terminal Domain	Protein trichome birefringence-like 37 OS=Arabidopsis thaliana OX=3702 GN=TBL37 PE=2 SV=2	S	Function unknown	PREDICTED: protein trichome birefringence-like 39 [Nelumbo nucifera]
Nn1g09124	Nn1g09124	31.3142	947	34.1825	1005	38.2984	1310	11.9758	336	4.93133	207	12.5983	411	0.219757	9	0.787639	17	0.302542	14	1.8e-08	-1.61816	down	3.66e-86	-5.83691	down	4e-20	4.03171	up	--	--	Cellular Component: cellular_component (GO:0005575);; Cellular Component: intracellular (GO:0005622);; Cellular Component: cell (GO:0005623);; Cellular Component: nucleus (GO:0005634);; Biological Process: nucleobase-containing compound metabolic process (GO:0006139);; Biological Process: transcription, DNA-templated (GO:0006351);; Biological Process: cellular aromatic compound metabolic process …	K13413|3.4e-52|sbi:110435403|K13413 mitogen-activated protein kinase kinase 4/5 [EC:2.7.12.2] | (RefSeq) mitogen-activated protein kinase kinase 5-like	MAPK signaling pathway - plant (ko04016);; Plant hormone signal transduction (ko04075);; Plant-pathogen interaction (ko04626)	--	--	Protein of unknown function (DUF640)	Protein LIGHT-DEPENDENT SHORT HYPOCOTYLS 10 OS=Arabidopsis thaliana OX=3702 GN=LSH10 PE=1 SV=1	S	Function unknown	PREDICTED: protein LIGHT-DEPENDENT SHORT HYPOCOTYLS 10 [Nelumbo nucifera]
Nn1g09156	Nn1g09156	1.39084	88	0.879426	54	0.684339	50	2.80499	168	3.83853	273	2.1628	149	5.20132	348	8.05842	489	7.6801	494	1.27e-05	1.63908	up	7.55e-24	3.2119	up	1.23e-06	-1.51648	down	[T]	Signal transduction mechanisms	Molecular Function: protein serine/threonine kinase activity (GO:0004674);; Molecular Function: ATP binding (GO:0005524);; Biological Process: signal transduction (GO:0007165);;	K07198|2.2e-171|nnu:104611564|K07198 5'-AMP-activated protein kinase, catalytic alpha subunit [EC:2.7.11.11] | (RefSeq) CBL-interacting protein kinase 5-like	--	[T]	Signal transduction mechanisms	Protein kinase domain	CBL-interacting serine/threonine-protein kinase 20 OS=Arabidopsis thaliana OX=3702 GN=CIPK20 PE=1 SV=1	T	Signal transduction mechanisms	PREDICTED: CBL-interacting protein kinase 5-like [Nelumbo nucifera]
Nn1g09250	Nn1g09250	0.542597	47	0.677052	56	0.455854	45	2.78678	225	7.46678	721	2.80995	260	11.5084	1040	15.9891	1313	8.85631	770	7.92e-11	2.9022	up	5.09e-53	4.80997	up	0.00034803	-1.69829	down	--	--	Cellular Component: integral component of membrane (GO:0016021);;	--	--	--	--	--	--	--	--	PREDICTED: uncharacterized protein LOC104588063 [Nelumbo nucifera]
Nn1g09277	Nn1g09277	5.83716	418	5.07535	351	4.58422	376	22.3357	1506	23.5751	1896	17.5917	1349	49.4915	3722	51.8634	3453	31.3745	2265	5.16e-32	2.13056	up	3.62e-42	3.48264	up	2.47e-06	-1.33955	down	[K]	Transcription	Molecular Function: transcription factor activity, sequence-specific DNA binding (GO:0003700);; Biological Process: DNA-templated transcription, initiation (GO:0006352);;	K03086|1.7e-288|nnu:104610327|K03086 RNA polymerase primary sigma factor | (RefSeq) RNA polymerase sigma factor sigA-like	--	--	--	Sigma-70 region 3	RNA polymerase sigma factor sigA OS=Arabidopsis thaliana OX=3702 GN=SIGA PE=1 SV=1	K	Transcription	PREDICTED: RNA polymerase sigma factor sigA-like [Nelumbo nucifera]
Nn1g09305	Nn1g09305	1.68291	87	2.40813	120	1.66026	98	11.6022	564	26.1743	1521	7.83941	437	0.666758	37	0.146134	8	0.300764	16	1.98e-11	2.93574	up	0.00166574	-1.8319	down	1.43e-14	4.56516	up	--	--	Molecular Function: transferase activity, transferring acyl groups other than amino-acyl groups (GO:0016747);;	K19861|2.1e-274|nnu:104610311|K19861 benzyl alcohol O-benzoyltransferase [EC:2.3.1.196 2.3.1.232] | (RefSeq) benzyl alcohol O-benzoyltransferase	--	--	--	Transferase family	Benzyl alcohol O-benzoyltransferase OS=Nicotiana tabacum OX=4097 GN=HSR201 PE=1 SV=1	S	Function unknown	PREDICTED: benzyl alcohol O-benzoyltransferase [Nelumbo nucifera]
Nn1g09322	Nn1g09322	185.154	6766	208.584	7347	176.599	7348	72.6236	2510	71.3475	2941	85.5185	3434	25.456	996	26.1948	919	20.0258	756	2.67e-17	-1.1776	down	4.07e-44	-2.54462	down	1.08e-11	1.3488	up	--	--	Molecular Function: RNA binding (GO:0003723);; Cellular Component: nucleus (GO:0005634);;	K11086|8.6e-87|nnu:104610321|K11086 small nuclear ribonucleoprotein B and B' | (RefSeq) small nuclear ribonucleoprotein-associated protein B'-like	Spliceosome (ko03040)	[K]	Transcription	LSM domain	--	A	RNA processing and modification	PREDICTED: small nuclear ribonucleoprotein-associated protein B'-like [Nelumbo nucifera]
Nn1g09338	Nn1g09338	4.37363	457	4.06041	416	3.78014	459	39.7768	4100	38.9798	4798	21.9402	2606	127.339	14359	162.421	16423	48.9473	5243	2.66e-37	3.16043	up	2.25e-34	5.14367	up	5.38e-05	-1.9234	down	[IR]	Lipid transport and metabolism;; General function prediction only	Cellular Component: integral component of membrane (GO:0016021);; Molecular Function: long-chain-alcohol oxidase activity (GO:0046577);; Molecular Function: flavin adenine dinucleotide binding (GO:0050660);;	K17756|1.3e-293|nnu:104610302|K17756 long-chain-alcohol oxidase [EC:1.1.3.20] | (RefSeq) long-chain-alcohol oxidase FAO4A-like	--	--	--	GMC oxidoreductase	Long-chain-alcohol oxidase FAO4A OS=Arabidopsis thaliana OX=3702 GN=FAO4A PE=3 SV=2	E	Amino acid transport and metabolism	PREDICTED: long-chain-alcohol oxidase FAO4A-like [Nelumbo nucifera]
Nn1g09357	Nn1g09357	16.0078	1214	13.6448	1000	14.9486	1296	31.7414	2271	40.0222	3420	24.2039	1986	121.217	9724	146.806	10707	97.2062	7490	1.99e-08	1.21375	up	1.66e-64	3.4471	up	3.42e-15	-2.20237	down	[HT]	Coenzyme transport and metabolism;; Signal transduction mechanisms	Molecular Function: protein kinase activity (GO:0004672);; Molecular Function: ATP binding (GO:0005524);;	K08869|1.8e-109|ota:OT_ostta07g02770|K08869 aarF domain-containing kinase | (RefSeq) Protein kinase-like domain	--	[R]	General function prediction only	ABC1 family	Protein ACTIVITY OF BC1 COMPLEX KINASE 1, chloroplastic OS=Arabidopsis thaliana OX=3702 GN=ABC1K1 PE=1 SV=1	J	Translation, ribosomal structure and biogenesis	PREDICTED: uncharacterized aarF domain-containing protein kinase At4g31390, chloroplastic [Nelumbo nucifera]
Nn1g09359	Nn1g09359	4.818	286	4.63409	267	4.14335	282	1.19367	68	2.0169	136	1.23036	80	0.273811	18	0.214743	13	0.404598	25	4.36e-07	-1.44193	down	2.34e-31	-3.42353	down	2.66e-05	1.88247	up	[S]	Function unknown	Biological Process: telomere maintenance (GO:0000723);; Molecular Function: DNA helicase activity (GO:0003678);; Molecular Function: ATP binding (GO:0005524);; Biological Process: DNA repair (GO:0006281);; Biological Process: DNA recombination (GO:0006310);;	K15255|3.4e-273|nnu:104610272|K15255 ATP-dependent DNA helicase PIF1 [EC:3.6.4.12] | (RefSeq) ATP-dependent DNA helicase PIF1-like	--	[D]	Cell cycle control, cell division, chromosome partitioning	PIF1-like helicase	--	L	Replication, recombination and repair	PREDICTED: ATP-dependent DNA helicase PIF1-like [Nelumbo nucifera]
Nn1g09370	Nn1g09370	16.5	1849	11.7904	1287	11.4523	1471	40.1499	4174	53.1919	6583	33.0014	3945	173.989	20610	109.081	11595	47.8627	5398	4.96e-14	1.7394	up	8.47e-14	3.42407	up	0.000709373	-1.64983	down	--	--	Molecular Function: DNA binding (GO:0003677);;	--	--	[L]	Replication, recombination and repair	--	--	L	Replication, recombination and repair	PREDICTED: DNA-binding protein SMUBP-2 [Nelumbo nucifera]
Nn1g09375	Nn1g09375	1.12618	89	1.3309	99	1.73613	160	23.4523	1777	16.7169	1478	13.2474	1148	106.103	9161	194.825	15337	103.423	8581	1.04e-39	3.71002	up	2.25e-99	6.98402	up	9.4e-20	-3.17692	down	[Q]	Secondary metabolites biosynthesis, transport and catabolism	Molecular Function: oxidoreductase activity, acting on single donors with incorporation of molecular oxygen, incorporation of two atoms of oxygen (GO:0016702);; Molecular Function: metal ion binding (GO:0046872);;	K09840|0.0e+00|nnu:104610285|K09840 9-cis-epoxycarotenoid dioxygenase [EC:1.13.11.51] | (RefSeq) probable carotenoid cleavage dioxygenase 4, chloroplastic	Carotenoid biosynthesis (ko00906)	[Q]	Secondary metabolites biosynthesis, transport and catabolism	Retinal pigment epithelial membrane protein	Probable carotenoid cleavage dioxygenase 4, chloroplastic OS=Arabidopsis thaliana OX=3702 GN=CCD4 PE=1 SV=1	Q	Secondary metabolites biosynthesis, transport and catabolism	PREDICTED: probable carotenoid cleavage dioxygenase 4, chloroplastic [Nelumbo nucifera]
Nn1g09394	Nn1g09394	4.12158	261	4.0952	251	3.02729	214	17.3713	1047	14.2952	1023	23.1851	1577	0.184969	14	0.485656	30	0.970565	59	6.79e-24	2.37513	up	2.66e-06	-2.33357	down	7.74e-24	4.56047	up	[E]	Amino acid transport and metabolism	Molecular Function: methylenetetrahydrofolate reductase (NAD(P)H) activity (GO:0004489);; Biological Process: methionine metabolic process (GO:0006555);; Biological Process: tetrahydrofolate interconversion (GO:0035999);;	K00297|0.0e+00|nnu:104612216|K00297 methylenetetrahydrofolate reductase (NADPH) [EC:1.5.1.20] | (RefSeq) probable methylenetetrahydrofolate reductase	One carbon pool by folate (ko00670);; Carbon metabolism (ko01200)	[E]	Amino acid transport and metabolism	Methylenetetrahydrofolate reductase	Methylenetetrahydrofolate reductase 1 OS=Zea mays OX=4577 PE=2 SV=1	E	Amino acid transport and metabolism	PREDICTED: probable methylenetetrahydrofolate reductase [Nelumbo nucifera]
Nn1g09458	Nn1g09458	16.8767	870	15.0751	753	16.2281	959	70.7864	2936	54.0722	2657	43.8669	2104	150.323	7070	186.275	7853	217.671	10021	6.1e-17	1.67689	up	2.47e-120	3.71894	up	7.98e-16	-2.01395	down	[QR]	Secondary metabolites biosynthesis, transport and catabolism;; General function prediction only	Molecular Function: oxidoreductase activity (GO:0016491);;	K19825|9.5e-143|vvi:100256090|K19825 2-alkenal reductase (NADP+) [EC:1.3.1.102] | (RefSeq) NADP-dependent alkenal double bond reductase P2-like	--	[R]	General function prediction only	Zinc-binding dehydrogenase	2-alkenal reductase (NADP(+)-dependent) OS=Nicotiana tabacum OX=4097 GN=DBR PE=1 SV=1	S	Function unknown	PREDICTED: 2-alkenal reductase (NADP(+)-dependent)-like isoform X2 [Nelumbo nucifera]
Nn1g09468	Nn1g09468	0.784699	29	1.40409	50	0.658709	28	4.81717	166	9.6968	399	4.42034	175	2.1421	83	1.67245	59	2.27781	85	3.09e-09	2.67275	up	0.000406762	1.48497	up	0.00257375	1.27304	up	--	--	Biological Process: protein glycosylation (GO:0006486);; Molecular Function: transferase activity, transferring glycosyl groups (GO:0016757);;	--	--	--	--	--	--	--	--	probable glycosyltransferase At3g07620 [Vitis riparia]
Nn1g09555	Nn1g09555	52.6322	1095	72.1869	1456	44.5487	1063	3.64117	72	2.72344	65	3.78512	86	0	0	0.063741	2	0	0	2.85e-50	-3.85949	down	1.81e-33	-9.56977	down	1.81e-12	5.28121	up	--	--	Cellular Component: integral component of membrane (GO:0016021);;	--	--	--	--	--	--	--	--	PREDICTED: uncharacterized protein LOC104586987 [Nelumbo nucifera]
Nn1g09556	Nn1g09556	108.778	2263	142.439	2872	97.4014	2323	6.81568	135	5.24754	124	6.45023	146	0	0	0.077681	2	0.050797	2	1.88e-80	-4.05956	down	1.51e-53	-9.93994	down	3.63e-19	5.59975	up	--	--	Cellular Component: integral component of membrane (GO:0016021);;	--	--	--	#VALUE!	--	--	--	--	PREDICTED: uncharacterized protein LOC104586986 [Nelumbo nucifera]
Nn1g09563	Nn1g09563	1.69614	163	1.81437	169	2.09751	230	0.872585	80	0.390725	43	1.0843	113	0.151096	16	0.216341	20	0.220894	22	0.00767216	-1.08641	down	1.05e-19	-2.7892	down	0.00263103	1.57544	up	[M]	Cell wall/membrane/envelope biogenesis	Molecular Function: protein kinase activity (GO:0004672);; Molecular Function: ATP binding (GO:0005524);;	K13435|1.2e-97|spen:107018783|K13435 serine/threonine-protein kinase Pto | (RefSeq) receptor-like protein kinase HERK 1 isoform X2	Plant-pathogen interaction (ko04626)	[T]	Signal transduction mechanisms	Protein tyrosine and serine/threonine kinase	Receptor-like protein kinase ANXUR1 OS=Arabidopsis thaliana OX=3702 GN=ANX1 PE=1 SV=1	T	Signal transduction mechanisms	PREDICTED: receptor-like protein kinase ANXUR1 [Nelumbo nucifera]
Nn1g09655	Nn1g09655	9.14894	360	7.03907	273	9.25571	415	3.35935	129	2.39845	107	3.33887	143	0.030041	2	0.04961	3	0.043596	2	5.92e-09	-1.33042	down	2.43e-32	-6.54952	down	1.89e-18	4.95262	up	--	--	Cellular Component: integral component of membrane (GO:0016021);; Molecular Function: transmembrane transporter activity (GO:0022857);;	--	--	--	--	EamA-like transporter family	WAT1-related protein At5g45370 OS=Arabidopsis thaliana OX=3702 GN=At5g45370 PE=2 SV=1	--	--	PREDICTED: WAT1-related protein At5g07050-like isoform X2 [Nelumbo nucifera]
Nn1g09722	Nn1g09722	1.9259	149	1.32654	100	1.32174	117	0.553503	41	0.80293	71	0.653099	55	0.082724	7	0.122975	10	0.180986	15	0.00177025	-1.01543	down	9.64e-13	-3.0136	down	0.000105318	1.90427	up	--	--	Molecular Function: zinc ion binding (GO:0008270);;	K22733|3.4e-127|cit:102612526|K22733 magnesium transporter | (RefSeq) uncharacterized protein LOC102612526	--	[R]	General function prediction only	PPR repeat	Pentatricopeptide repeat-containing protein At3g49170, chloroplastic OS=Arabidopsis thaliana OX=3702 GN=EMB2261 PE=2 SV=1	S	Function unknown	PREDICTED: pentatricopeptide repeat-containing protein At2g22070-like [Nelumbo nucifera]
Nn1g09750	Nn1g09750	3.65184	177	1.40584	66	3.60769	200	5.83679	268	8.2188	451	4.26738	225	12.6305	649	15.303	714	17.7906	878	0.00741549	1.15886	up	4.58e-14	2.78768	up	2.34e-07	-1.58635	down	--	--	Biological Process: auxin-activated signaling pathway (GO:0009734);; Cellular Component: integral component of membrane (GO:0016021);; Biological Process: transmembrane transport (GO:0055085);;	K13947|9.2e-192|nnu:104605305|K13947 auxin efflux carrier family protein | (RefSeq) auxin efflux carrier component 5	--	--	--	Membrane transport protein	Auxin efflux carrier component 5 OS=Arabidopsis thaliana OX=3702 GN=PIN5 PE=2 SV=2	U	Intracellular trafficking, secretion, and vesicular transport	PREDICTED: auxin efflux carrier component 5 [Nelumbo nucifera]
Nn1g09761	Nn1g09761	45.1452	1095	39.7851	936	39.512	1099	428.202	9863	440.773	12134	476.068	12560	87.3888	2254	133.964	3137	83.9372	2081	0	3.55141	up	1.49e-13	1.71343	up	2.45e-14	1.80776	up	--	--	Cellular Component: photosystem I reaction center (GO:0009538);; Biological Process: photosynthesis (GO:0015979);; Cellular Component: integral component of membrane (GO:0016021);;	K02699|8.9e-119|nnu:104605295|K02699 photosystem I subunit XI | (RefSeq) photosystem I reaction center subunit XI, chloroplastic	Photosynthesis (ko00195)	--	--	Photosystem I reaction centre subunit XI	Photosystem I reaction center subunit XI, chloroplastic OS=Cucumis sativus OX=3659 GN=PSAL PE=2 SV=1	S	Function unknown	PREDICTED: photosystem I reaction center subunit XI, chloroplastic [Nelumbo nucifera]
Nn1g09829	Nn1g09829	32.5329	2514	26.8806	2030	28.1201	2527	70.822	5179	111.565	9868	59.1322	4985	250.204	20969	187.023	14013	125.39	9929	1.3e-09	1.56242	up	2.61e-25	3.10506	up	0.000111374	-1.50118	down	[G]	Carbohydrate transport and metabolism	Cellular Component: integral component of membrane (GO:0016021);; Molecular Function: transmembrane transporter activity (GO:0022857);;	K08150|1.1e-96|nnu:104586093|K08150 MFS transporter, SP family, solute carrier family 2 (myo-inositol transporter), member 13 | (RefSeq) inositol transporter 1	--	[R]	General function prediction only	Sugar (and other) transporter	Inositol transporter 1 OS=Arabidopsis thaliana OX=3702 GN=INT1 PE=1 SV=1	E	Amino acid transport and metabolism	PREDICTED: inositol transporter 1 [Nelumbo nucifera]
Nn1g09830	Nn1g09830	0.500115	29	0.511113	28	0.334128	22	7.21612	388	8.51118	546	6.07354	374	0.950091	58	1.81199	99	0.838772	49	7.72e-47	4.04098	up	0.000110643	1.80482	up	9.84e-10	2.21811	up	[QV]	Secondary metabolites biosynthesis, transport and catabolism;; Defense mechanisms	Molecular Function: monooxygenase activity (GO:0004497);; Molecular Function: iron ion binding (GO:0005506);; Cellular Component: integral component of membrane (GO:0016021);; Molecular Function: oxidoreductase activity, acting on paired donors, with incorporation or reduction of molecular oxygen (GO:0016705);; Molecular Function: heme binding (GO:0020037);;	K15402|1.9e-111|atr:105421698|K15402 fatty acid omega-hydroxylase [EC:1.14.-.-] | (RefSeq) cytochrome P450 86B1-like	Cutin, suberine and wax biosynthesis (ko00073)	[QI]	Secondary metabolites biosynthesis, transport and catabolism;; Lipid transport and metabolism	Cytochrome P450	Alkane hydroxylase MAH1 OS=Arabidopsis thaliana OX=3702 GN=CYP96A15 PE=2 SV=1	Q	Secondary metabolites biosynthesis, transport and catabolism	PREDICTED: alkane hydroxylase MAH1-like [Nelumbo nucifera]
Nn1g09865	Nn1g09865	1.16961	85	0.628237	44	1.18758	95	2.55781	162	4.6826	359	2.46629	178	6.53545	479	7.42411	484	8.43679	577	2.74e-05	1.66946	up	6.68e-35	3.2321	up	7.67e-06	-1.48792	down	--	--	Molecular Function: aspartic-type endopeptidase activity (GO:0004190);;	K22683|1.3e-41|bna:106401404|K22683 aspartyl protease family protein [EC:3.4.23.-] | (RefSeq) aspartyl protease family protein 2-like	--	[O]	Posttranslational modification, protein turnover, chaperones	Xylanase inhibitor C-terminal	Aspartic proteinase NANA, chloroplast OS=Arabidopsis thaliana OX=3702 GN=NANA PE=1 SV=1	O	Posttranslational modification, protein turnover, chaperones	PREDICTED: aspartyl protease family protein 2-like [Nelumbo nucifera]
Nn1g09867	Nn1g09867	3.79975	149	2.17843	73	2.88931	127	187.649	6465	101.923	4290	126.418	4973	492.965	18963	632.513	22534	896.412	32271	2.15e-82	5.49463	up	2.69e-168	8.11751	up	4.3e-16	-2.50996	down	--	--	Cellular Component: anchored component of plasma membrane (GO:0046658);;	--	--	--	--	DREPP plasma membrane polypeptide	Plasma membrane-associated cation-binding protein 1 OS=Arabidopsis thaliana OX=3702 GN=PCAP1 PE=1 SV=1	S	Function unknown	PREDICTED: plasma membrane-associated cation-binding protein 1 [Nelumbo nucifera]
Nn1g09880	Nn1g09880	18.0828	526	16.6295	471	14.8149	497	73.0092	2020	76.8794	2539	75.7264	2401	30.2129	936	36.4759	1026	17.6248	525	5.49e-90	2.304	up	0.000181141	1.18937	up	0.000738882	1.08054	up	[T]	Signal transduction mechanisms	Molecular Function: molecular_function (GO:0003674);; Molecular Function: binding (GO:0005488);; Molecular Function: protein binding (GO:0005515);; Cellular Component: cellular_component (GO:0005575);; Cellular Component: intracellular (GO:0005622);; Cellular Component: cell (GO:0005623);; Cellular Component: cytoplasm (GO:0005737);; Biological Process: cellular aromatic compound metabolic proces…	--	--	--	--	GUN4-like	Tetrapyrrole-binding protein, chloroplastic OS=Arabidopsis thaliana OX=3702 GN=GUN4 PE=1 SV=1	S	Function unknown	PREDICTED: tetrapyrrole-binding protein, chloroplastic [Nelumbo nucifera]
Nn2g10242	Nn2g10242	24.8037	1729	20.4328	1372	17.071	1355	96.7771	6407	299.064	23592	75.6473	5740	943.282	69679	776.454	52367	278.049	19430	2.32e-05	2.69241	up	3.09e-33	5.34908	up	0.000329957	-2.20306	down	--	--	Biological Process: phototropism (GO:0009638);;	--	--	--	--	NPH3 family	Root phototropism protein 2 OS=Arabidopsis thaliana OX=3702 GN=RPT2 PE=1 SV=2	S	Function unknown	PREDICTED: root phototropism protein 2 [Nelumbo nucifera]
Nn2g10286	Nn2g10286	4.94418	156	4.18672	128	4.88818	177	1.43187	43	1.7188	62	2.47873	85	0	0	0.072378	3	0.022192	1	0.000115445	-1.15661	down	2.29e-18	-6.06065	down	5.69e-10	4.4452	up	--	--	--	--	--	--	--	--	--	--	--	PREDICTED: inner centromere protein-like isoform X1 [Nelumbo nucifera]
Nn2g10288	Nn2g10288	3.2477	158	3.29971	157	3.06158	168	5.85302	269	6.27147	345	6.10399	322	0.672649	35	0.932055	45	0.792265	41	6.74e-10	1.04024	up	2.3e-09	-1.53298	down	3.98e-27	2.54802	up	[C]	Energy production and conversion	Molecular Function: glycerol-3-phosphate dehydrogenase [NAD+] activity (GO:0004367);; Biological Process: carbohydrate metabolic process (GO:0005975);; Cellular Component: glycerol-3-phosphate dehydrogenase complex (GO:0009331);; Biological Process: glycerol-3-phosphate catabolic process (GO:0046168);; Molecular Function: NAD binding (GO:0051287);;	K00006|3.2e-248|nnu:104594475|K00006 glycerol-3-phosphate dehydrogenase (NAD+) [EC:1.1.1.8] | (RefSeq) glycerol-3-phosphate dehydrogenase [NAD(+)] 2, chloroplastic	Glycerophospholipid metabolism (ko00564)	[C]	Energy production and conversion	NAD-dependent glycerol-3-phosphate dehydrogenase C-terminus	Glycerol-3-phosphate dehydrogenase [NAD(+)] 2, chloroplastic OS=Arabidopsis thaliana OX=3702 GN=GLY1 PE=1 SV=1	C	Energy production and conversion	PREDICTED: glycerol-3-phosphate dehydrogenase [NAD(+)] 2, chloroplastic [Nelumbo nucifera]
Nn2g10308	Nn2g10308	1.00514	67	4.92661	317	2.6271	198	110.1	7010	69.4065	5301	145.762	10672	0.107911	8	0.138165	9	0.079265	6	3.51e-15	4.75097	up	1.18e-09	-4.05194	down	4.61e-110	9.18648	up	[QV]	Secondary metabolites biosynthesis, transport and catabolism;; Defense mechanisms	Molecular Function: monooxygenase activity (GO:0004497);; Molecular Function: iron ion binding (GO:0005506);; Cellular Component: integral component of membrane (GO:0016021);; Molecular Function: oxidoreductase activity, acting on paired donors, with incorporation or reduction of molecular oxygen (GO:0016705);; Molecular Function: heme binding (GO:0020037);;	K12153|0.0e+00|nnu:104594490|K12153 phenylalanine N-monooxygenase [EC:1.14.14.40] | (RefSeq) phenylalanine N-monooxygenase	Cyanoamino acid metabolism (ko00460);; Glucosinolate biosynthesis (ko00966);; 2-Oxocarboxylic acid metabolism (ko01210)	[Q]	Secondary metabolites biosynthesis, transport and catabolism	Cytochrome P450	Phenylalanine N-monooxygenase OS=Arabidopsis thaliana OX=3702 GN=CYP79A2 PE=1 SV=1	Q	Secondary metabolites biosynthesis, transport and catabolism	PREDICTED: phenylalanine N-monooxygenase [Nelumbo nucifera]
Nn2g10337	Nn2g10337	0.366016	20	0.316768	18	0.300361	20	0.989914	54	1.27376	79	0.779978	47	1.77123	102	1.61007	86	1.70642	101	7.5e-05	1.64839	up	5.95e-19	2.74621	up	0.00129376	-1.02857	down	--	--	--	--	--	--	--	--	--	--	--	PREDICTED: uncharacterized protein LOC104594514 isoform X2 [Nelumbo nucifera]
Nn2g10345	Nn2g10345	7.66853	303	7.82103	297	6.22077	279	2.01236	82	1.29196	67	3.06128	131	0.396163	19	0.636217	27	0.803435	33	8.3e-07	-1.51997	down	5.47e-25	-3.00661	down	0.00192844	1.40119	up	--	--	Biological Process: stomatal complex development (GO:0010374);; Cellular Component: integral component of membrane (GO:0016021);;	--	--	--	--	Epidermal patterning factor proteins	EPIDERMAL PATTERNING FACTOR-like protein 6 OS=Arabidopsis thaliana OX=3702 GN=EPFL6 PE=1 SV=1	S	Function unknown	PREDICTED: EPIDERMAL PATTERNING FACTOR-like protein 5 [Nelumbo nucifera]
Nn2g10468	Nn2g10468	119.112	3511	119.085	3403	110.335	3729	8.23522	231	5.37098	180	9.19564	295	0.549791	18	1.4967	43	1.13976	35	2.06e-78	-3.76637	down	1.67e-115	-6.28942	down	8.69e-09	2.4173	up	--	--	Cellular Component: nucleosome (GO:0000786);; Molecular Function: DNA binding (GO:0003677);; Cellular Component: nucleus (GO:0005634);; Molecular Function: protein heterodimerization activity (GO:0046982);;	K11252|1.8e-59|nnu:104594615|K11252 histone H2B | (RefSeq) histone H2B-like	--	[B]	Chromatin structure and dynamics	Core histone H2A/H2B/H3/H4	Probable histone H2B.1 OS=Medicago truncatula OX=3880 PE=3 SV=3	B	Chromatin structure and dynamics	PREDICTED: histone H2B-like [Nelumbo nucifera]
Nn2g10495	Nn2g10495	8.78219	520	9.40775	511	8.10277	533	3.0051	171	2.1753	146	3.37152	219	0.198567	17	0.278749	16	0.156747	12	3.16e-11	-1.42767	down	1.93e-61	-4.63181	down	9.17e-17	3.10934	up	--	--	Cellular Component: integral component of membrane (GO:0016021);; Molecular Function: transferase activity (GO:0016740);;	K20891|2.5e-130|nnu:104594635|K20891 beta-glucuronosyltransferase [EC:2.4.1.-] | (RefSeq) beta-glucuronosyltransferase GlcAT14A-like	--	[G]	Carbohydrate transport and metabolism	Core-2/I-Branching enzyme	Beta-glucuronosyltransferase GlcAT14A OS=Arabidopsis thaliana OX=3702 GN=GLCAT14A PE=2 SV=1	G	Carbohydrate transport and metabolism	PREDICTED: beta-glucuronosyltransferase GlcAT14B-like isoform X2 [Nelumbo nucifera]
Nn2g10536	Nn2g10536	4.98781	205	3.34468	133	3.46774	163	1.5821	62	1.29899	61	1.45353	65	0.15725	7	0.237821	10	0.046208	2	4.98e-06	-1.28138	down	1.44e-16	-4.15066	down	1.34e-06	2.72185	up	--	--	Cellular Component: plasma membrane (GO:0005886);; Molecular Function: kinase activity (GO:0016301);; Molecular Function: kinase inhibitor activity (GO:0019210);;	--	--	--	--	--	Probable membrane-associated kinase regulator 4 OS=Arabidopsis thaliana OX=3702 GN=MAKR4 PE=3 SV=1	S	Function unknown	PREDICTED: probable membrane-associated kinase regulator 4 [Nelumbo nucifera]
Nn2g10553	Nn2g10553	18.2649	1310	10.3001	731	20.2544	1643	4.22711	301	9.55323	765	4.47394	326	37.4745	2953	26.1143	1911	15.5125	1207	0.00134461	-1.2486	down	0.00318043	1.1926	up	1.44e-07	-2.4064	down	[V]	Defense mechanisms	Molecular Function: ATP binding (GO:0005524);; Cellular Component: integral component of membrane (GO:0016021);; Molecular Function: ATPase activity (GO:0016887);;	K05681|3.4e-63|var:108331191|K05681 ATP-binding cassette, subfamily G (WHITE), member 2 | (RefSeq) ABC transporter G family member 5-like	ABC transporters (ko02010)	[Q]	Secondary metabolites biosynthesis, transport and catabolism	ABC transporter	ABC transporter G family member 20 OS=Arabidopsis thaliana OX=3702 GN=ABCG20 PE=2 SV=1	Q	Secondary metabolites biosynthesis, transport and catabolism	PREDICTED: ABC transporter G family member 6-like [Nelumbo nucifera]
Nn2g10587	Nn2g10587	39.8918	1076	40.0519	1043	42.0903	1298	5.00395	129	2.39034	74	5.31473	157	0	0	0	0	0	0	2.96e-27	-3.05858	down	1.5e-23	-10.6881	down	1.72e-14	6.59135	up	--	--	--	--	--	--	--	--	--	--	--	PREDICTED: uncharacterized protein LOC104594710 [Nelumbo nucifera]
Nn2g10635	Nn2g10635	22.3033	1162	23.3118	1235	18.5992	1152	42.2529	2186	81.2771	4951	34.3282	2039	120.143	6904	140.01	7352	85.7259	4789	2.23e-05	1.39905	up	3.75e-32	2.86382	up	0.000408261	-1.40131	down	[J]	Translation, ribosomal structure and biogenesis	Molecular Function: MAP kinase activity (GO:0004707);; Molecular Function: ATP binding (GO:0005524);;	K20536|2.1e-150|nnu:104594741|K20536 mitogen-activated protein kinase 3 [EC:2.7.11.24] | (RefSeq) mitogen-activated protein kinase 3-like	MAPK signaling pathway - plant (ko04016);; Plant-pathogen interaction (ko04626)	[T]	Signal transduction mechanisms	Protein kinase domain	Mitogen-activated protein kinase 3 OS=Arabidopsis thaliana OX=3702 GN=MPK3 PE=1 SV=2	T	Signal transduction mechanisms	PREDICTED: mitogen-activated protein kinase 3-like [Nelumbo nucifera]
Nn2g10660	Nn2g10660	30.6039	2127	28.0702	1884	25.5676	2044	10.6177	713	8.08334	645	10.8923	837	0.852614	63	1.26197	85	1.408	104	2.07e-17	-1.3527	down	1.46e-88	-4.11949	down	5.86e-25	2.72191	up	--	--	Biological Process: microtubule cytoskeleton organization (GO:0000226);; Cellular Component: cellular_component (GO:0005575);; Cellular Component: intracellular (GO:0005622);; Cellular Component: cell (GO:0005623);; Cellular Component: nucleus (GO:0005634);; Cellular Component: cytoplasm (GO:0005737);; Cellular Component: cytoskeleton (GO:0005856);; Cellular Component: microtubule (GO:0005874);; …	--	--	--	--	--	Interactor of constitutive active ROPs 2, chloroplastic OS=Arabidopsis thaliana OX=3702 GN=ICR2 PE=1 SV=1	S	Function unknown	PREDICTED: interactor of constitutive active ROPs 3 isoform X1 [Nelumbo nucifera]
Nn2g10762	Nn2g10762	119.462	3298	134.27	3589	101.943	3235	306.82	8069	314.863	9916	353.574	10680	47.6774	1404	53.3367	1425	28.2935	805	1.97e-26	1.57493	up	0.000704038	-1.01381	down	3.76e-19	2.55197	up	--	--	Cellular Component: photosystem I (GO:0009522);; Cellular Component: photosystem II (GO:0009523);; Cellular Component: chloroplast thylakoid membrane (GO:0009535);; Biological Process: photosynthesis, light harvesting (GO:0009765);; Cellular Component: integral component of membrane (GO:0016021);; Molecular Function: chlorophyll binding (GO:0016168);; Biological Process: protein-chromophore linka…	K08907|7.9e-09|nnu:104594830|K08907 light-harvesting complex I chlorophyll a/b binding protein 1 | (RefSeq) chlorophyll a-b binding protein 6, chloroplastic-like	Photosynthesis - antenna proteins (ko00196)	--	--	--	--	C	Energy production and conversion	PREDICTED: chlorophyll a-b binding protein 6, chloroplastic-like [Nelumbo nucifera]
Nn2g10766	Nn2g10766	3.40979	227	4.39389	281	5.92585	456	16.4845	1024	20.821	1611	13.5356	975	39.7177	3110	27.7269	1929	23.5065	1510	3.91e-12	1.96984	up	1.84e-19	3.20351	up	0.00079112	-1.20336	down	--	--	Cellular Component: ubiquitin ligase complex (GO:0000151);; Molecular Function: molecular_function (GO:0003674);; Molecular Function: binding (GO:0005488);; Molecular Function: protein binding (GO:0005515);; Cellular Component: cellular_component (GO:0005575);; Cellular Component: intracellular (GO:0005622);; Cellular Component: cell (GO:0005623);; Cellular Component: nucleus (GO:0005634);; Cellu…	--	--	[R]	General function prediction only	Kelch motif	F-box/kelch-repeat protein At5g60570 OS=Arabidopsis thaliana OX=3702 GN=At5g60570 PE=2 SV=1	S	Function unknown	PREDICTED: F-box/kelch-repeat protein At5g60570-like [Nelumbo nucifera]
Nn2g10781	Nn2g10781	53.2112	4025	47.6269	3593	56.5261	5063	124.527	9158	122.585	10295	115.5	8941	347.04	26171	316.397	23201	202.044	15062	4.7e-25	1.26967	up	1.25e-27	2.80112	up	2.04e-08	-1.52727	down	[I]	Lipid transport and metabolism	Molecular Function: iron ion binding (GO:0005506);; Biological Process: terpenoid biosynthetic process (GO:0016114);; Molecular Function: 4-hydroxy-3-methylbut-2-en-1-yl diphosphate synthase activity (GO:0046429);;	K03526|0.0e+00|nnu:104594845|K03526 (E)-4-hydroxy-3-methylbut-2-enyl-diphosphate synthase [EC:1.17.7.1 1.17.7.3] | (RefSeq) 4-hydroxy-3-methylbut-2-en-1-yl diphosphate synthase (ferredoxin), chloroplastic	Terpenoid backbone biosynthesis (ko00900)	--	--	GcpE protein	4-hydroxy-3-methylbut-2-en-1-yl diphosphate synthase (ferredoxin), chloroplastic OS=Arabidopsis thaliana OX=3702 GN=ISPG PE=1 SV=1	I	Lipid transport and metabolism	PREDICTED: 4-hydroxy-3-methylbut-2-en-1-yl diphosphate synthase (ferredoxin), chloroplastic [Nelumbo nucifera]
Nn2g10794	Nn2g10794	552.733	23935	689.231	28212	477.564	23434	1018.92	40560	1884.61	92093	734.88	34697	5256.16	237371	4594.74	186870	1900.41	86848	0.000901117	1.17288	up	3.78e-16	3.16548	up	9.27e-05	-1.90558	down	[G]	Carbohydrate transport and metabolism	Molecular Function: channel activity (GO:0015267);; Cellular Component: integral component of membrane (GO:0016021);;	K09872|2.4e-111|nnu:104594854|K09872 aquaporin PIP | (RefSeq) aquaporin PIP2-4-like	--	[G]	Carbohydrate transport and metabolism	Major intrinsic protein	Aquaporin PIP2-4 OS=Zea mays OX=4577 GN=PIP2-4 PE=1 SV=1	G	Carbohydrate transport and metabolism	PREDICTED: aquaporin PIP2-4-like [Nelumbo nucifera]
Nn2g10802	Nn2g10802	29.0998	2591	27.5216	2351	26.2658	2660	6.70111	569	8.13633	802	8.29018	811	2.34563	227	1.87084	157	2.02723	172	3.22e-41	-1.70346	down	3.26e-79	-3.31021	down	2.01e-12	1.5808	up	--	--	Molecular Function: DNA binding (GO:0003677);; Cellular Component: nucleus (GO:0005634);; Molecular Function: lipid binding (GO:0008289);;	K09338|0.0e+00|nnu:104594858|K09338 homeobox-leucine zipper protein | (RefSeq) homeobox-leucine zipper protein REVOLUTA-like	--	--	--	MEKHLA domain	Homeobox-leucine zipper protein REVOLUTA OS=Arabidopsis thaliana OX=3702 GN=REV PE=1 SV=2	K	Transcription	PREDICTED: homeobox-leucine zipper protein REVOLUTA-like [Nelumbo nucifera]
Nn2g10810	Nn2g10810	7.57581	254	8.35077	270	6.42603	250	16.308	516	14.1803	538	14.3795	523	22.2479	769	27.7541	872	25.3704	844	2.18e-10	1.11305	up	5.07e-35	2.12663	up	2.33e-10	-1.01344	down	[J]	Translation, ribosomal structure and biogenesis	Molecular Function: N-acetyltransferase activity (GO:0008080);;	--	--	--	--	Acetyltransferase (GNAT) family	--	S	Function unknown	PREDICTED: uncharacterized protein LOC104594865 [Nelumbo nucifera]
Nn2g10815	Nn2g10815	10.7326	475	9.6623	415	13.8477	710	19.0749	906	18.653	977	21.6425	1137	0.932756	48	0.4383	22	2.24657	117	8.75e-08	1.02288	up	1.35e-06	-2.58202	down	6.64e-12	3.46017	up	--	--	Cellular Component: nucleus (GO:0005634);; Molecular Function: zinc ion binding (GO:0008270);; Molecular Function: sequence-specific DNA binding (GO:0043565);; Biological Process: positive regulation of transcription, DNA-templated (GO:0045893);;	--	--	--	--	--	--	K	Transcription	PREDICTED: GATA transcription factor 8-like [Nelumbo nucifera]
Nn2g10846	Nn2g10846	4.58861	154	5.09912	165	4.58039	176	15.8317	502	16.5338	621	15.2676	533	1.76428	64	1.26827	41	1.39674	48	3.25e-30	1.82537	up	5.25e-06	-1.23471	down	2.78e-38	3.03252	up	--	--	Cellular Component: cellular_component (GO:0005575);; Cellular Component: intracellular (GO:0005622);; Cellular Component: cell (GO:0005623);; Cellular Component: cytoplasm (GO:0005737);; Biological Process: response to stress (GO:0006950);; Biological Process: biological_process (GO:0008150);; Biological Process: response to temperature stimulus (GO:0009266);; Biological Process: response to col…	--	--	--	--	Rhodanese-like domain	Rhodanese-like domain-containing protein 10 OS=Arabidopsis thaliana OX=3702 GN=STR10 PE=2 SV=1	S	Function unknown	PREDICTED: rhodanese-like domain-containing protein 10 isoform X1 [Nelumbo nucifera]
Nn2g10870	Nn2g10870	3.58485	197	4.64581	246	3.27203	209	10.3901	546	14.0689	868	9.30648	556	27.7427	1619	26.7391	1419	25.6313	1441	5.54e-11	1.6447	up	2.33e-63	3.21391	up	3.77e-12	-1.54314	down	[C]	Energy production and conversion	Molecular Function: oxidoreductase activity (GO:0016491);;	K17871|1.1e-259|nnu:104594915|K17871 NADH:ubiquinone reductase (non-electrogenic) [EC:1.6.5.9] | (RefSeq) internal alternative NAD(P)H-ubiquinone oxidoreductase A1, mitochondrial-like	--	[C]	Energy production and conversion	Pyridine nucleotide-disulphide oxidoreductase	Internal alternative NAD(P)H-ubiquinone oxidoreductase A1, mitochondrial OS=Solanum tuberosum OX=4113 GN=NDA1 PE=3 SV=1	C	Energy production and conversion	PREDICTED: internal alternative NAD(P)H-ubiquinone oxidoreductase A1, mitochondrial-like isoform X2 [Nelumbo nucifera]
Nn2g10872	Nn2g10872	16.4617	679	12.7876	400	15.0363	702	30.4268	1175	30.7396	1353	25.0728	1097	83.0775	3410	85.8585	3264	78.0964	3580	1.64e-07	1.13008	up	1.23e-49	2.98416	up	2.5e-38	-1.85335	down	--	--	Molecular Function: acyl-CoA dehydrogenase activity (GO:0003995);; Molecular Function: flavin adenine dinucleotide binding (GO:0050660);;	K00232|4.4e-38|nnu:104594917|K00232 acyl-CoA oxidase [EC:1.3.3.6] | (RefSeq) acyl-coenzyme A oxidase 4, peroxisomal-like	Fatty acid degradation (ko00071);; beta-Alanine metabolism (ko00410);; alpha-Linolenic acid metabolism (ko00592);; Propanoate metabolism (ko00640);; Biosynthesis of unsaturated fatty acids (ko01040);; Carbon metabolism (ko01200);; Fatty acid metabolism (ko01212);; Peroxisome (ko04146)	[E]	Amino acid transport and metabolism	--	Acyl-coenzyme A oxidase 4, peroxisomal OS=Arabidopsis thaliana OX=3702 GN=ACX4 PE=1 SV=1	E	Amino acid transport and metabolism	PREDICTED: acyl-coenzyme A oxidase 4, peroxisomal-like isoform X2 [Nelumbo nucifera]
Nn2g10874	Nn2g10874	23.7855	215	20.9358	183	25.8342	267	8.36877	72	12.0906	124	10.1385	100	0	0	0	0	0	0	1.86e-05	-1.05304	down	1.86e-13	-8.60305	down	3.61e-14	6.46061	up	--	--	Cellular Component: integral component of membrane (GO:0016021);;	--	--	--	--	--	--	--	--	PREDICTED: uncharacterized protein LOC104602579 [Nelumbo nucifera]
Nn2g10878	Nn2g10878	8.19556	1579	8.40278	1569	6.83838	1495	1.96918	330	2.40026	483	2.47197	464	0.07189	13	0.101635	19	0.125897	21	3.15e-27	-1.76757	down	1.63e-109	-5.96505	down	8.39e-44	4.12847	up	--	--	Molecular Function: metal ion binding (GO:0046872);;	--	--	--	--	Tify domain binding domain	Increased DNA methylation 1 OS=Arabidopsis thaliana OX=3702 GN=IDM1 PE=1 SV=1	S	Function unknown	PREDICTED: uncharacterized protein LOC104594923 isoform X5 [Nelumbo nucifera]
Nn2g10879	Nn2g10879	13.2982	700	18.0636	921	13.7924	844	28.8985	1486	33.6994	2064	33.7169	1992	1.15321	64	2.19676	113	0.958629	49	2.55e-11	1.2375	up	4.05e-15	-2.94553	down	9.17e-33	4.11109	up	--	--	--	K23877|2.1e-35|aly:9324825|K23877 xyloglucan O-acetyltransferase | (RefSeq) protein ALTERED XYLOGLUCAN 4	--	--	--	GDSL/SGNH-like Acyl-Esterase family found in Pmr5 and Cas1p	Protein PMR5 OS=Arabidopsis thaliana OX=3702 GN=PMR5 PE=2 SV=1	S	Function unknown	PREDICTED: protein PMR5-like [Nelumbo nucifera]
Nn2g10882	Nn2g10882	112.441	8017	87.4868	5976	98.2843	8029	334.441	22087	541.027	43114	344.991	26406	806.358	59720	1029.37	69846	836.112	57899	5.84e-21	2.11458	up	1.37e-99	3.54713	up	2.6e-07	-1.39931	down	[E]	Amino acid transport and metabolism	Molecular Function: asparagine synthase (glutamine-hydrolyzing) activity (GO:0004066);; Molecular Function: ATP binding (GO:0005524);; Biological Process: asparagine biosynthetic process (GO:0006529);; Biological Process: glutamine metabolic process (GO:0006541);;	K01953|0.0e+00|nnu:104594925|K01953 asparagine synthase (glutamine-hydrolysing) [EC:6.3.5.4] | (RefSeq) asparagine synthetase [glutamine-hydrolyzing]	Alanine, aspartate and glutamate metabolism (ko00250);; Biosynthesis of amino acids (ko01230)	[E]	Amino acid transport and metabolism	Asparagine synthase	Asparagine synthetase [glutamine-hydrolyzing] OS=Asparagus officinalis OX=4686 PE=2 SV=2	E	Amino acid transport and metabolism	PREDICTED: asparagine synthetase [glutamine-hydrolyzing] [Nelumbo nucifera]
Nn2g10883	Nn2g10883	2.08809	133	2.23533	143	2.01844	151	0.977591	61	0.531976	38	1.13552	82	0	0	0	0	0	0	0.00304395	-1.09444	down	1.9e-11	-8.05924	down	2.48e-10	5.73666	up	--	--	Cellular Component: integral component of membrane (GO:0016021);;	K23877|9.1e-37|soe:110782899|K23877 xyloglucan O-acetyltransferase | (RefSeq) protein ALTERED XYLOGLUCAN 4 isoform X1	--	--	--	GDSL/SGNH-like Acyl-Esterase family found in Pmr5 and Cas1p	Protein ESKIMO 1 OS=Arabidopsis thaliana OX=3702 GN=ESK1 PE=1 SV=1	S	Function unknown	PREDICTED: protein ESKIMO 1-like [Nelumbo nucifera]
Nn2g10890	Nn2g10890	6.47359	1318	5.86334	1157	5.40279	1261	1.64281	318	2.0952	479	2.02801	450	0.819059	178	0.731065	144	0.644556	135	3.05e-22	-1.48651	down	2.15e-47	-2.5695	down	5.07e-06	1.0582	up	--	--	Cellular Component: anaphase-promoting complex (GO:0005680);;	K03348|0.0e+00|nnu:104594929|K03348 anaphase-promoting complex subunit 1 | (RefSeq) anaphase-promoting complex subunit 1	Ubiquitin mediated proteolysis (ko04120)	[DO]	Cell cycle control, cell division, chromosome partitioning;; Posttranslational modification, protein turnover, chaperones	Anaphase-promoting complex sub unit 1 C-terminal domain	Anaphase-promoting complex subunit 1 OS=Arabidopsis thaliana OX=3702 GN=APC1 PE=2 SV=1	--	--	PREDICTED: anaphase-promoting complex subunit 1 [Nelumbo nucifera]
Nn2g10917	Nn2g10917	70.5712	4422	69.9638	4412	66.5679	4980	20.9302	1342	16.8117	1270	20.7588	1497	1.90653	143	1.34264	88	3.53909	227	4.32e-38	-1.6381	down	3.49e-47	-4.43679	down	7e-16	2.74788	up	[GHR]	Carbohydrate transport and metabolism;; Coenzyme transport and metabolism;; General function prediction only	Molecular Function: magnesium ion binding (GO:0000287);; Molecular Function: carboxy-lyase activity (GO:0016831);; Molecular Function: thiamine pyrophosphate binding (GO:0030976);;	K01568|0.0e+00|nnu:104594948|K01568 pyruvate decarboxylase [EC:4.1.1.1] | (RefSeq) pyruvate decarboxylase 2-like	Glycolysis / Gluconeogenesis (ko00010)	[EH]	Amino acid transport and metabolism;; Coenzyme transport and metabolism	Thiamine pyrophosphate enzyme, N-terminal TPP binding domain	Pyruvate decarboxylase 2 OS=Arabidopsis thaliana OX=3702 GN=PDC2 PE=2 SV=1	--	--	PREDICTED: pyruvate decarboxylase 2-like [Nelumbo nucifera]
Nn2g10968	Nn2g10968	22.3927	1450	18.8294	1194	16.8798	1257	4.19993	264	3.37331	255	5.6858	407	1.2432	89	0.715137	49	1.13728	80	7.9e-19	-1.95497	down	6.97e-52	-3.696	down	7.62e-07	1.6834	up	--		Molecular Function: protein kinase activity (GO:0004672);; Molecular Function: ATP binding (GO:0005524);;	K04424|2.0e-23|rcu:8275600|K04424 sterile alpha motif and leucine zipper containing kinase AZK [EC:2.7.11.25] | (RefSeq) serine/threonine-protein kinase EDR1	--	[T]	Signal transduction mechanisms	Protein tyrosine and serine/threonine kinase	Serine/threonine-protein kinase STY46 OS=Arabidopsis thaliana OX=3702 GN=STY46 PE=1 SV=1	T	Signal transduction mechanisms	PREDICTED: probable serine/threonine-protein kinase DDB_G0272254 [Nelumbo nucifera]
Nn2g10982	Nn2g10982	12.952	358	14.5158	388	11.1721	356	33.5788	879	34.6484	1080	38.8905	1158	80.1656	2351	80.2125	2128	116.587	3300	3.87e-23	1.57447	up	3.39e-53	3.24384	up	7.6e-16	-1.66677	down	[P]	Inorganic ion transport and metabolism	Molecular Function: ferroxidase activity (GO:0004322);; Biological Process: iron ion transport (GO:0006826);; Biological Process: cellular iron ion homeostasis (GO:0006879);; Molecular Function: ferric iron binding (GO:0008199);;	K00522|3.2e-139|nnu:104597288|K00522 ferritin heavy chain [EC:1.16.3.2] | (RefSeq) ferritin-3, chloroplastic	--	[P]	Inorganic ion transport and metabolism	Ferritin-like domain	Ferritin-3, chloroplastic OS=Glycine max OX=3847 PE=2 SV=1	P	Inorganic ion transport and metabolism	PREDICTED: ferritin-3, chloroplastic [Nelumbo nucifera]
Nn2g11012	Nn2g11012	18.6212	1633	26.4472	2277	16.354	1640	1.50864	130	0.674455	71	1.30275	118	0	0	0	0	0	0	2.8e-35	-3.90487	down	1.31e-26	-11.2682	down	6.9e-14	6.47012	up	--	--	Molecular Function: protein kinase activity (GO:0004672);; Molecular Function: ATP binding (GO:0005524);; Cellular Component: integral component of membrane (GO:0016021);;	K20359|4.6e-73|eus:EUTSA_v10006389mg|K20359 PRA1 family protein 1 | (RefSeq) hypothetical protein	--	--	--	Leucine rich repeat	Probable leucine-rich repeat receptor-like protein kinase IMK3 OS=Arabidopsis thaliana OX=3702 GN=IMK3 PE=1 SV=1	T	Signal transduction mechanisms	PREDICTED: probably inactive leucine-rich repeat receptor-like protein kinase IMK2 [Nelumbo nucifera]
Nn2g11020	Nn2g11020	114.596	5812	109.733	5352	110.706	6447	29.8469	1414	20.5419	1174	41.0218	2263	0.500502	26	0.305437	17	0.614071	34	1.22e-12	-1.73036	down	1.16e-271	-7.35275	down	6.89e-51	5.44617	up	--	--	--	K19996|1.9e-70|lsv:111913509|K19996 phosphatidylinositol transfer protein SFH5 | (RefSeq) patellin-3	--	[I]	Lipid transport and metabolism	CRAL/TRIO domain	Patellin-6 OS=Arabidopsis thaliana OX=3702 GN=PATL6 PE=2 SV=1	I	Lipid transport and metabolism	PREDICTED: patellin-6-like [Nelumbo nucifera]
Nn2g11022	Nn2g11022	6.47786	541	6.265	507	6.8357	610	23.2298	1845	26.4744	2515	16.8731	1536	65.6478	5586	66.6703	5178	39.624	3292	4.58e-21	1.90919	up	5.26e-44	3.52884	up	3.54e-07	-1.59387	down	[S]	Function unknown	Cellular Component: cellular_component (GO:0005575);; Cellular Component: intracellular (GO:0005622);; Cellular Component: cell (GO:0005623);; Cellular Component: cytoplasm (GO:0005737);; Biological Process: cellular aromatic compound metabolic process (GO:0006725);; Biological Process: porphyrin-containing compound metabolic process (GO:0006778);; Biological Process: porphyrin-containing compoun…	K01595|1.3e-12|mdm:103427458|K01595 phosphoenolpyruvate carboxylase [EC:4.1.1.31] | (RefSeq) phosphoenolpyruvate carboxylase-like	Pyruvate metabolism (ko00620);; Carbon fixation in photosynthetic organisms (ko00710);; Carbon metabolism (ko01200)	--	--	Protein RETICULATA-related	Protein RETICULATA-RELATED 6, chloroplastic OS=Arabidopsis thaliana OX=3702 GN=RER6 PE=2 SV=1	S	Function unknown	PREDICTED: protein RETICULATA-RELATED 5, chloroplastic-like [Nelumbo nucifera]
Nn2g11099	Nn2g11099	21.0786	1919	21.9913	1948	19.5388	2043	9.39267	735	8.73142	840	9.27208	901	3.23293	295	4.46141	344	3.71413	306	1.25e-23	-1.15703	down	1.65e-46	-2.18535	down	1.9e-09	1.0136	up	--	--	Cellular Component: cellular_component (GO:0005575);; Cellular Component: intracellular (GO:0005622);; Cellular Component: cell (GO:0005623);; Cellular Component: cytoplasm (GO:0005737);; Cellular Component: cytosol (GO:0005829);; Biological Process: organelle organization (GO:0006996);; Biological Process: biological_process (GO:0008150);; Biological Process: plastid organization (GO:0009657);; …	--	--	--	--	Weak chloroplast movement under blue light	WEB family protein At2g38370 OS=Arabidopsis thaliana OX=3702 GN=At2g38370 PE=2 SV=1	S	Function unknown	PREDICTED: WEB family protein At2g38370 [Nelumbo nucifera]
Nn2g11123	Nn2g11123	13.9446	235	15.7958	258	16.1192	311	43.1151	688	58.3774	1114	56.6466	1036	2.40524	43	0.228548	4	0.276873	5	1.75e-23	1.88795	up	2.59e-05	-3.29352	down	6.57e-12	4.7528	up	--	--	--	K01803|1.5e-35|sbi:8057784|K01803 triosephosphate isomerase (TIM) [EC:5.3.1.1] | (RefSeq) triosephosphate isomerase, cytosolic	Glycolysis / Gluconeogenesis (ko00010);; Fructose and mannose metabolism (ko00051);; Inositol phosphate metabolism (ko00562);; Carbon fixation in photosynthetic organisms (ko00710);; Carbon metabolism (ko01200);; Biosynthesis of amino acids (ko01230)	[R]	General function prediction only	C2 domain	Elicitor-responsive protein 1 OS=Oryza sativa subsp. indica OX=39946 GN=ERG1 PE=2 SV=2	G	Carbohydrate transport and metabolism	PREDICTED: elicitor-responsive protein 1-like [Nelumbo nucifera]
Nn2g11132	Nn2g11132	57.2297	1662	52.6362	1482	40.8852	1361	12.2402	338	17.0695	563	13.8322	437	0.33282	11	0.156576	5	0.270492	9	6.93e-16	-1.65461	down	3.33e-86	-6.9651	down	4.91e-43	5.18346	up	--	--	Cellular Component: extracellular region (GO:0005576);; Cellular Component: cell wall (GO:0005618);; Biological Process: plant-type cell wall organization (GO:0009664);; Cellular Component: membrane (GO:0016020);;	K20628|3.8e-108|sind:105166984|K20628 expansin | (RefSeq) expansin-A2	--	--	--	Expansin C-terminal domain	Expansin-A4 OS=Arabidopsis thaliana OX=3702 GN=EXPA4 PE=1 SV=1	S	Function unknown	PREDICTED: expansin-A4 [Nelumbo nucifera]
Nn2g11149	Nn2g11149	11.5267	500	10.328	435	13.6217	653	37.9989	1610	29.9932	1495	34.3725	1673	105.348	4804	107.202	4462	173.42	8029	2.1e-26	1.6951	up	2.95e-53	3.87741	up	6.65e-16	-2.16818	down	[H]	Coenzyme transport and metabolism	Molecular Function: hydrolase activity (GO:0016787);;	K07025|1.7e-136|nnu:104597165|K07025 putative hydrolase of the HAD superfamily | (RefSeq) uncharacterized LOC104597165	--	[R]	General function prediction only	Haloacid dehalogenase-like hydrolase	--	S	Function unknown	PREDICTED: uncharacterized protein LOC104597165 [Nelumbo nucifera]
Nn2g11179	Nn2g11179	5.19348	248	2.6459	135	4.10602	221	1.0389	42	0.639534	36	1.95389	84	0.190435	8	0.212528	8	0.222555	11	2.23e-05	-1.71283	down	4.31e-21	-3.95218	down	0.000288469	2.06093	up	--	--	Molecular Function: DNA binding (GO:0003677);; Cellular Component: nucleus (GO:0005634);;	K14491|1.3e-21|fve:101292682|K14491 two-component response regulator ARR-B family | (RefSeq) two-component response regulator ARR1-like	Plant hormone signal transduction (ko04075)	--	--	Myb-like DNA-binding domain	Transcription factor LUX OS=Arabidopsis thaliana OX=3702 GN=LUX PE=1 SV=1	K	Transcription	PREDICTED: transcription factor PCL1 [Nelumbo nucifera]
Nn2g11276	Nn2g11276	0.6459	37	0.483926	27	0.376979	25	0.987719	54	1.0203	66	1.01537	63	1.22005	74	1.57288	86	2.23506	130	0.00385506	1.08964	up	2.43e-08	2.11781	up	0.003095	-1.00243	down	[T]	Signal transduction mechanisms	Molecular Function: metal ion binding (GO:0046872);;	--	--	[TZ]	Signal transduction mechanisms;; Cytoskeleton	Protein DA1	Protein DA1-related 2 OS=Arabidopsis thaliana OX=3702 GN=DAR2 PE=1 SV=1	--	--	PREDICTED: protein DA1-related 2-like [Nelumbo nucifera]
Nn2g11294	Nn2g11294	6.16084	544	7.41792	638	5.90583	623	1.05322	93	0.75906	72	0.983294	85	0.070489	8	0.03957	4	0.143908	14	1.46e-32	-2.70782	down	4.12e-52	-5.60159	down	6.69e-08	2.75402	up	--	--	Molecular Function: Rho guanyl-nucleotide exchange factor activity (GO:0005089);;	--	--	--	--	PRONE (Plant-specific Rop nucleotide exchanger)	Rop guanine nucleotide exchange factor 7 OS=Arabidopsis thaliana OX=3702 GN=ROPGEF7 PE=1 SV=1	G	Carbohydrate transport and metabolism	PREDICTED: rop guanine nucleotide exchange factor 7-like isoform X2 [Nelumbo nucifera]
Nn2g11301	Nn2g11301	151.932	2704	121.476	2096	125.667	2564	17.2583	292	17.2542	349	16.5944	322	1.09851	21	1.52071	27	0.61092	12	7.86e-108	-2.82064	down	6.49e-119	-6.42806	down	5.05e-27	3.54052	up	--	--	Molecular Function: copper ion transmembrane transporter activity (GO:0005375);; Biological Process: cellular copper ion homeostasis (GO:0006878);; Cellular Component: integral component of membrane (GO:0016021);;	K14686|6.8e-84|nnu:104597055|K14686 solute carrier family 31 (copper transporter), member 1 | (RefSeq) copper transporter 6-like	--	[P]	Inorganic ion transport and metabolism	Ctr copper transporter family	Copper transporter 1 OS=Arabidopsis thaliana OX=3702 GN=COPT1 PE=2 SV=2	P	Inorganic ion transport and metabolism	PREDICTED: copper transporter 6-like [Nelumbo nucifera]
Nn2g11369	Nn2g11369	18.4383	1180	20.1593	1216	21.5296	1530	6.81147	390	5.60727	388	7.66907	522	0.348489	28	0.650741	46	0.721699	51	1.59e-18	-1.47911	down	3.08e-78	-4.48906	down	3.76e-22	2.9507	up	--	--	Biological Process: reproduction (GO:0000003);; Biological Process: regionalization (GO:0003002);; Biological Process: developmental process involved in reproduction (GO:0003006);; Cellular Component: cellular_component (GO:0005575);; Cellular Component: cell (GO:0005623);; Cellular Component: plasma membrane (GO:0005886);; Biological Process: transport (GO:0006810);; Biological Process: multicel…	--	--	--	--	Protein of unknown function (DUF740)	Protein OCTOPUS OS=Arabidopsis thaliana OX=3702 GN=OPS PE=1 SV=1	S	Function unknown	PREDICTED: UPF0503 protein At3g09070, chloroplastic-like [Nelumbo nucifera]
Nn2g11415	Nn2g11415	48.8031	2944	34.6583	2043	38.4248	2667	224.635	13021	193.546	13459	215.522	14351	79.2356	5095	71.6093	4189	89.4068	5596	1.53e-70	2.50826	up	1.38e-16	1.41005	up	6.24e-13	1.09337	up	--	--	Cellular Component: integral component of membrane (GO:0016021);; Molecular Function: transferase activity, transferring acyl groups (GO:0016746);;	K13508|4.2e-112|nnu:104596970|K13508 glycerol-3-phosphate acyltransferase [EC:2.3.1.15 2.3.1.198] | (RefSeq) glycerol-3-phosphate 2-O-acyltransferase 6-like	Glycerolipid metabolism (ko00561);; Glycerophospholipid metabolism (ko00564)	--	--	haloacid dehalogenase-like hydrolase	Glycerol-3-phosphate 2-O-acyltransferase 6 OS=Arabidopsis thaliana OX=3702 GN=GPAT6 PE=1 SV=1	I	Lipid transport and metabolism	PREDICTED: glycerol-3-phosphate 2-O-acyltransferase 6-like [Nelumbo nucifera]
Nn2g11416	Nn2g11416	48.6179	2552	50.7872	2612	43.6401	2644	181.771	9050	195.182	11679	115.575	6641	348.205	19539	408.8	20702	351.272	19026	5.49e-17	1.87978	up	6.89e-141	3.37145	up	1.28e-08	-1.45918	down	[G]	Carbohydrate transport and metabolism	Molecular Function: channel activity (GO:0015267);; Cellular Component: integral component of membrane (GO:0016021);;	K09872|6.9e-100|nnu:104596969|K09872 aquaporin PIP | (RefSeq) aquaporin PIP1-1-like	--	[G]	Carbohydrate transport and metabolism	Major intrinsic protein	Aquaporin PIP1-1 OS=Oryza sativa subsp. japonica OX=39947 GN=PIP1-1 PE=2 SV=1	G	Carbohydrate transport and metabolism	PREDICTED: aquaporin PIP1-1-like [Nelumbo nucifera]
Nn2g11423	Nn2g11423	22.4411	1801	16.5197	1264	18.2416	1661	45.12	3504	45.6769	4205	39.4786	3571	148.425	13060	118.169	9305	83.2146	7011	3.6e-20	1.35182	up	9.26e-29	3.07893	up	8.31e-10	-1.72061	down	--	--	--	--	--	--	--	Tetratricopeptide repeat	--	S	Function unknown	PREDICTED: uncharacterized protein LOC104596966 [Nelumbo nucifera]
Nn2g11435	Nn2g11435	11.1688	876	11.4924	939	9.31225	858	3.38649	236	3.99772	376	3.71744	307	0.592194	60	0.689576	62	0.486256	47	1.25e-13	-1.44637	down	1.26e-52	-3.51637	down	5.05e-14	2.02908	up	[EH]	Amino acid transport and metabolism;; Coenzyme transport and metabolism	Biological Process: tryptophan biosynthetic process (GO:0000162);; Molecular Function: anthranilate synthase activity (GO:0004049);;	K01657|2.0e-279|nnu:104596958|K01657 anthranilate synthase component I [EC:4.1.3.27] | (RefSeq) anthranilate synthase alpha subunit 1, chloroplastic	Phenylalanine, tyrosine and tryptophan biosynthesis (ko00400);; Biosynthesis of amino acids (ko01230)	[E]	Amino acid transport and metabolism	chorismate binding enzyme	Anthranilate synthase alpha subunit 2, chloroplastic OS=Arabidopsis thaliana OX=3702 GN=ASA2 PE=2 SV=1	E	Amino acid transport and metabolism	PREDICTED: anthranilate synthase alpha subunit 2, chloroplastic isoform X3 [Nelumbo nucifera]
Nn2g11436	Nn2g11436	0.445602	23	0.47458	23	0.221756	13	1.15822	55	1.16969	67	0.950562	52	2.42945	129	3.15111	152	1.78166	91	0.00052065	1.55223	up	1.43e-12	3.04983	up	3.83e-05	-1.4329	down	--	--	Cellular Component: integral component of membrane (GO:0016021);; Molecular Function: transferase activity, transferring glycosyl groups (GO:0016757);;	K01988|4.2e-264|nnu:104596957|K01988 lactosylceramide 4-alpha-galactosyltransferase [EC:2.4.1.228] | (RefSeq) lactosylceramide 4-alpha-galactosyltransferase-like	Glycosphingolipid biosynthesis - lacto and neolacto series (ko00601);; Glycosphingolipid biosynthesis - globo and isoglobo series (ko00603)	[G]	Carbohydrate transport and metabolism	Alpha 1,4-glycosyltransferase conserved region	Uncharacterized protein At4g19900 OS=Arabidopsis thaliana OX=3702 GN=At4g19900 PE=2 SV=1	G	Carbohydrate transport and metabolism	PREDICTED: lactosylceramide 4-alpha-galactosyltransferase-like [Nelumbo nucifera]
Nn2g11442	Nn2g11442	2.15144	307	2.07929	288	1.56669	254	0.441691	61	0.62561	100	0.632025	99	0.140312	22	0.111389	16	0.248659	37	6.64e-10	-1.60128	down	3.43e-18	-3.03234	down	0.00176263	1.36765	up	--	--	Molecular Function: zinc ion binding (GO:0008270);;	K22733|5.2e-142|cit:102612526|K22733 magnesium transporter | (RefSeq) uncharacterized protein LOC102612526	--	[R]	General function prediction only	PPR repeat	Pentatricopeptide repeat-containing protein At2g29760, chloroplastic OS=Arabidopsis thaliana OX=3702 GN=PCMP-H33 PE=2 SV=1	S	Function unknown	PREDICTED: pentatricopeptide repeat-containing protein At2g29760, chloroplastic [Nelumbo nucifera]
Nn2g11466	Nn2g11466	1.30206	43	0.994718	32	0.44428	17	46.343	1430	48.3904	1785	39.7636	1406	12.0739	417	17.0385	535	9.33746	310	1.2e-79	5.58231	up	2.48e-22	4.15086	up	2.29e-07	1.47022	up	--	--	Cellular Component: photosystem I (GO:0009522);; Cellular Component: photosystem II (GO:0009523);; Cellular Component: chloroplast thylakoid membrane (GO:0009535);; Biological Process: photosynthesis, light harvesting (GO:0009765);; Cellular Component: integral component of membrane (GO:0016021);; Molecular Function: chlorophyll binding (GO:0016168);; Biological Process: protein-chromophore linka…	K08915|1.2e-166|nnu:104595012|K08915 light-harvesting complex II chlorophyll a/b binding protein 4 | (RefSeq) chlorophyll a-b binding protein CP29.2, chloroplastic	Photosynthesis - antenna proteins (ko00196)	--	--	Chlorophyll A-B binding protein	Chlorophyll a-b binding protein CP29.1, chloroplastic OS=Arabidopsis thaliana OX=3702 GN=LHCB4.1 PE=1 SV=1	C	Energy production and conversion	PREDICTED: chlorophyll a-b binding protein CP29.2, chloroplastic [Nelumbo nucifera]
Nn2g11503	Nn2g11503	10.8877	265	15.3188	361	10.2444	286	4.04343	94	3.04548	84	4.47267	119	1.0428	27	0.660686	16	0.961998	24	1.65e-07	-1.49868	down	2.96e-22	-3.29594	down	5.3e-06	1.73531	up	--	--	Biological Process: positive regulation of circadian rhythm (GO:0042753);;	--	--	--	--	Early Flowering 4 domain	Protein EARLY FLOWERING 4 OS=Arabidopsis thaliana OX=3702 GN=ELF4 PE=1 SV=1	S	Function unknown	PREDICTED: protein EARLY FLOWERING 4-like [Nelumbo nucifera]
Nn2g11509	Nn2g11509	17.2735	944	19.5822	1092	15.9957	1031	7.05816	373	6.64613	407	9.02031	490	0.809572	47	0.818646	43	2.17617	119	2.15e-11	-1.17333	down	6.08e-18	-3.39763	down	2.63e-07	2.16622	up	--	--	Molecular Function: transferase activity (GO:0016740);;	--	--	[R]	General function prediction only	Glycosyl transferase family 90	--	S	Function unknown	PREDICTED: O-glucosyltransferase rumi homolog isoform X1 [Nelumbo nucifera]
Nn2g11531	Nn2g11531	4.93724	494	4.51794	445	4.18226	473	1.93166	187	1.62052	183	1.89726	212	0	0	0	0	0	0	7.19e-12	-1.17009	down	1.23e-17	-9.56717	down	5.5e-20	7.36068	up	--	--	Molecular Function: DNA binding (GO:0003677);; Cellular Component: nucleus (GO:0005634);; Biological Process: regulation of transcription, DNA-templated (GO:0006355);;	--	--	[K]	Transcription	Associated with HOX	BEL1-like homeodomain protein 9 OS=Arabidopsis thaliana OX=3702 GN=BLH9 PE=1 SV=1	K	Transcription	PREDICTED: homeobox protein BEL1 homolog [Nelumbo nucifera]
Nn2g11557	Nn2g11557	0.069373	6	0	0	0	0	22.8759	1281	12.4681	831	21.0523	1331	2.57366	148	2.88894	182	4.30535	264	1.09e-08	5.17318	up	2.87e-22	6.72402	up	1.93e-10	2.13909	up	--	--	Cellular Component: integral component of membrane (GO:0016021);;	K15015|1.3e-302|nnu:104595080|K15015 solute carrier family 32 (vesicular inhibitory amino acid transporter) | (RefSeq) vacuolar amino acid transporter 1-like	--	[E]	Amino acid transport and metabolism	Transmembrane amino acid transporter protein	Amino acid transporter AVT1C OS=Arabidopsis thaliana OX=3702 GN=AVT1C PE=1 SV=1	E	Amino acid transport and metabolism	PREDICTED: vacuolar amino acid transporter 1-like isoform X1 [Nelumbo nucifera]
Nn2g11615	Nn2g11615	21.4966	939	21.336	903	18.1517	909	6.11466	254	4.24819	211	6.59926	314	2.10475	98	1.27752	54	0.84353	38	1.67e-16	-1.70101	down	4.98e-21	-3.36206	down	0.000197408	1.60792	up	--	--	Cellular Component: plasma membrane (GO:0005886);; Cellular Component: integral component of membrane (GO:0016021);;	K14313|4.3e-07|csat:104705004|K14313 nuclear pore complex protein Nup53 | (RefSeq) CASP-like protein 3A1	RNA transport (ko03013)	--	--	Domain of unknown function (DUF588)	CASP-like protein 3A1 OS=Vitis vinifera OX=29760 GN=VIT_09s0002g03780 PE=2 SV=1	S	Function unknown	PREDICTED: CASP-like protein 3A1 [Nelumbo nucifera]
Nn2g11638	Nn2g11638	2.26399	118	2.6713	135	2.44774	146	8.86158	438	8.56824	506	8.15272	461	27.7928	1523	21.161	1058	24.7999	1315	6.69e-29	1.89944	up	4.18e-79	3.72423	up	2.12e-22	-1.81866	down	--	--	Cellular Component: integral component of membrane (GO:0016021);;	K10664|2.4e-254|nnu:104595130|K10664 E3 ubiquitin-protein ligase ATL6/9/15/31/42/55 [EC:2.3.2.27] | (RefSeq) putative RING-H2 finger protein ATL12	--	[O]	Posttranslational modification, protein turnover, chaperones	Ring finger domain	E3 ubiquitin-protein ligase ATL42 OS=Arabidopsis thaliana OX=3702 GN=ATL42 PE=1 SV=2	O	Posttranslational modification, protein turnover, chaperones	PREDICTED: putative RING-H2 finger protein ATL12 [Nelumbo nucifera]
Nn2g11641	Nn2g11641	144.535	3743	184.908	4633	141.207	4177	720.26	17705	717.363	20881	649.839	18324	1396.18	38241	1421.75	35353	1583.43	39544	2.52e-45	2.25276	up	6.55e-108	3.60611	up	2.74e-36	-1.35153	down	[G]	Carbohydrate transport and metabolism	Molecular Function: channel activity (GO:0015267);; Cellular Component: integral component of membrane (GO:0016021);;	K09873|2.5e-133|nnu:104595131|K09873 aquaporin TIP | (RefSeq) aquaporin TIP2-1	--	[G]	Carbohydrate transport and metabolism	Major intrinsic protein	Aquaporin TIP2-1 OS=Arabidopsis thaliana OX=3702 GN=TIP2-1 PE=1 SV=2	G	Carbohydrate transport and metabolism	PREDICTED: aquaporin TIP2-1 [Nelumbo nucifera]
Nn2g11644	Nn2g11644	42.7164	2172	44.7438	2205	41.7578	2434	16.1282	779	8.2544	477	17.0758	945	1.23039	67	2.08823	103	4.39967	229	5.91e-08	-1.48795	down	1.94e-18	-3.59867	down	5.46e-05	2.01365	up	--	--	Molecular Function: kinase activity (GO:0016301);;	K14963|2.1e-109|ccaj:109801591|K14963 COMPASS component SWD3 | (RefSeq) protein JINGUBANG-like	--	[R]	General function prediction only	WD domain, G-beta repeat	Protein JINGUBANG OS=Arabidopsis thaliana OX=3702 GN=JGB PE=1 SV=1	S	Function unknown	PREDICTED: myosin heavy chain kinase B-like [Nelumbo nucifera]
Nn2g11675	Nn2g11675	11.3041	547	11.853	581	14.1612	819	31.7693	1513	40.1945	2277	24.4945	1361	58.9144	3103	80.6872	3907	48.505	2479	1.39e-10	1.4862	up	4.35e-27	2.74482	up	4.44e-05	-1.23805	down	--	--	Biological Process: carbohydrate transport (GO:0008643);; Cellular Component: integral component of membrane (GO:0016021);; Molecular Function: transmembrane transporter activity (GO:0022857);;	--	--	--	--	--	--	U	Intracellular trafficking, secretion, and vesicular transport	PREDICTED: probable plastidic glucose transporter 2 isoform X1 [Nelumbo nucifera]
Nn2g11705	Nn2g11705	90.0928	1013	87.5118	954	70.3741	907	14.4028	154	20.2399	259	17.3828	213	4.36727	53	3.01867	33	3.47175	40	4.97e-26	-2.09629	down	1.36e-63	-4.04439	down	1.33e-09	1.89458	up	--	--	Molecular Function: motor activity (GO:0003774);; Cellular Component: cytoplasm (GO:0005737);; Cellular Component: microtubule (GO:0005874);; Biological Process: microtubule-based process (GO:0007017);; Cellular Component: dynein complex (GO:0030286);;	K10418|9.7e-52|nnu:104595179|K10418 dynein light chain LC8-type | (RefSeq) dynein light chain 1, cytoplasmic-like	--	[Z]	Cytoskeleton	Dynein light chain type 1	--	Z	Cytoskeleton	PREDICTED: dynein light chain 1, cytoplasmic-like [Nelumbo nucifera]
Nn2g11767	Nn2g11767	147.549	2468	141.345	2292	152.571	2925	59.1935	941	64.6341	1227	69.1447	1258	5.53862	99	4.01485	65	3.63287	63	2.65e-23	-1.0643	down	7.01e-108	-4.60181	down	1.14e-48	3.49713	up	--	--	--	--	--	--	--	--	--	--	--	hypothetical protein FRX31_018427 [Thalictrum thalictroides]
Nn2g11775	Nn2g11775	1.20638	49	0.918809	36	0.895203	41	3.06928	117	3.77368	171	4.10262	178	0	0	0.044732	2	0.196729	9	8.22e-12	1.93135	up	0.00112135	-2.85916	down	2.09e-13	4.55523	up	--	--	--	--	--	--	--	C2 domain	--	--	--	--
Nn2g11789	Nn2g11789	49.9182	3324	106.381	6676	75.838	5837	13.4236	853	13.8517	1076	20.4007	1432	1.96676	134	1.98247	132	0.812108	60	1.64e-12	-2.10755	down	1.16e-34	-5.0634	down	1.14e-14	2.8858	up	--	--	--	--	--	--	--	zinc-finger of the FCS-type, C2-C2	FCS-Like Zinc finger 10 OS=Arabidopsis thaliana OX=3702 GN=FLZ10 PE=1 SV=1	S	Function unknown	PREDICTED: uncharacterized protein LOC104595233 isoform X1 [Nelumbo nucifera]
Nn2g11794	Nn2g11794	28.8723	2475	26.957	2243	35.8563	3520	3.15936	271	3.12767	314	2.78633	261	0.085219	9	0.166966	15	0.192431	18	9.94e-78	-3.14119	down	5.01e-124	-7.08533	down	1.4e-31	3.86926	up	[P]	Inorganic ion transport and metabolism	Molecular Function: secondary active sulfate transmembrane transporter activity (GO:0008271);; Cellular Component: integral component of membrane (GO:0016021);;	K17471|0.0e+00|nnu:104595236|K17471 sulfate transporter 3 | (RefSeq) probable sulfate transporter 3.4	--	[P]	Inorganic ion transport and metabolism	Sulfate permease family	Probable sulfate transporter 3.4 OS=Arabidopsis thaliana OX=3702 GN=SULTR3;4 PE=2 SV=1	P	Inorganic ion transport and metabolism	PREDICTED: probable sulfate transporter 3.4 isoform X1 [Nelumbo nucifera]
Nn2g11810	Nn2g11810	5.47056	325	4.82118	265	5.18362	359	18.7213	997	26.2199	1601	19.4941	1181	8.10353	478	11.0229	553	6.45183	354	1.74e-30	2.06961	up	6.44e-05	1.01141	up	0.000202543	1.04526	up	[O]	Posttranslational modification, protein turnover, chaperones	Molecular Function: ATP binding (GO:0005524);;	K03593|3.2e-19|mis:MICPUN_107712|K03593 ATP-binding protein involved in chromosome partitioning | (RefSeq) hypothetical protein	--	[D]	Cell cycle control, cell division, chromosome partitioning	NUBPL iron-transfer P-loop NTPase	Fe-S cluster assembly factor HCF101, chloroplastic OS=Oryza sativa subsp. japonica OX=39947 GN=HCF101 PE=3 SV=3	D	Cell cycle control, cell division, chromosome partitioning	PREDICTED: fe-S cluster assembly factor HCF101, chloroplastic-like isoform X1 [Nelumbo nucifera]
Nn2g11844	Nn2g11844	13.1983	510	13.3659	501	10.2714	455	4.87601	179	1.63385	72	5.25643	221	0	0	0	0	0.04575	2	0.000488806	-1.45599	down	1.76e-25	-8.36855	down	1.31e-14	6.01778	up	--	--	Cellular Component: plasma membrane (GO:0005886);; Cellular Component: integral component of membrane (GO:0016021);;	K20855|6.4e-24|dzi:111275668|K20855 beta-1,3-galactosyltransferase 1/2/3/4/5/7/8 [EC:2.4.1.-] | (RefSeq) probable beta-1,3-galactosyltransferase 4 isoform X1	--	--	--	Domain of unknown function (DUF588)	CASP-like protein 2A1 OS=Vitis vinifera OX=29760 GN=VIT_01s0010g01870 PE=2 SV=1	S	Function unknown	PREDICTED: CASP-like protein 2A1 [Nelumbo nucifera]
Nn2g11862	Nn2g11862	1.30738	37	1.07284	25	1.84797	51	11.3131	284	9.94414	274	6.61255	198	19.3328	527	34.521	864	19.7016	519	1.08e-17	2.7864	up	1.41e-37	4.51323	up	1.62e-06	-1.65716	down	--	--	--	--	--	--	--	--	--	--	--	PREDICTED: uncharacterized protein LOC104595278 isoform X1 [Nelumbo nucifera]
Nn2g11880	Nn2g11880	10.8789	878	9.00868	703	9.18776	850	2.0988	159	1.53675	132	3.42953	300	0.394172	32	0.333004	27	0.748905	63	1.07e-09	-1.89204	down	1.9e-35	-3.837	down	0.000176347	1.82372	up	--	--	--	--	--	--	--	--	--	--	--	PREDICTED: uncharacterized protein LOC104595290 [Nelumbo nucifera]
Nn2g11882	Nn2g11882	89.6642	5413	70.4957	4122	85.2139	5908	17.2222	1003	13.361	922	16.7769	1118	0.147756	13	0.262112	17	0.830372	54	1.36e-49	-2.21436	down	7.51e-55	-6.94353	down	2.27e-22	4.58673	up	--	--	--	K14494|4.6e-310|nnu:104595293|K14494 DELLA protein | (RefSeq) DELLA protein GAI-like	Plant hormone signal transduction (ko04075)	--	--	GRAS domain family	DELLA protein GAI1 OS=Vitis vinifera OX=29760 GN=GAI1 PE=2 SV=1	K	Transcription	PREDICTED: DELLA protein GAI-like [Nelumbo nucifera]
Nn2g11903	Nn2g11903	9.2768	403	9.45748	398	7.53738	375	26.4432	1090	39.8283	1962	22.4595	1061	95.8856	4423	99.5059	4169	47.7971	2120	1.11e-12	1.84983	up	6.64e-28	3.60955	up	1.03e-05	-1.71377	down	[L]	Replication, recombination and repair	--	--	--	--	--	SOUL heme-binding protein	--	S	Function unknown	PREDICTED: uncharacterized protein LOC104595304 [Nelumbo nucifera]
Nn2g11925	Nn2g11925	1.78936	171	1.65468	154	2.02416	222	0.732133	67	0.43305	47	0.770762	81	0.17363	18	0.09904	10	0.164135	17	1.28e-05	-1.33634	down	7.28e-21	-3.11033	down	0.00047284	1.67974	up	--	--	Molecular Function: molecular_function (GO:0003674);; Molecular Function: nucleic acid binding (GO:0003676);; Molecular Function: RNA binding (GO:0003723);; Molecular Function: catalytic activity (GO:0003824);; Molecular Function: nuclease activity (GO:0004518);; Molecular Function: endonuclease activity (GO:0004519);; Molecular Function: binding (GO:0005488);; Cellular Component: cellular_compon…	--	--	[R]	General function prediction only	PPR repeat family	Putative pentatricopeptide repeat-containing protein At1g26500 OS=Arabidopsis thaliana OX=3702 GN=At1g26500 PE=3 SV=1	S	Function unknown	PREDICTED: putative pentatricopeptide repeat-containing protein At1g26500 [Nelumbo nucifera]
Nn2g11940	Nn2g11940	2.22444	186	1.8772	152	1.57346	151	0.712578	57	0.657132	63	0.820936	75	0	0	0	0	0	0	5.04e-06	-1.21123	down	5.57e-12	-8.2195	down	1.09e-11	5.97089	up	--	--	--	--	--	--	--	--	--	--	--	PREDICTED: uncharacterized protein LOC104610793 [Nelumbo nucifera]
Nn2g11954	Nn2g11954	47.4304	679	37.2312	551	27.9452	457	5.79009	81	8.73254	154	10.4278	172	1.5933	27	0.579332	10	0.595085	10	2.83e-10	-1.93522	down	6.62e-27	-4.64146	down	7.73e-07	2.56325	up	--	--	Cellular Component: integral component of membrane (GO:0016021);;	--	--	--	--	Early nodulin 93 ENOD93 protein	Early nodulin-93 OS=Glycine max OX=3847 PE=2 SV=1	S	Function unknown	PREDICTED: early nodulin-93-like [Nelumbo nucifera]
Nn2g11959	Nn2g11959	88.1114	2391	123.081	3068	94.3128	2828	13.6181	373	17.7581	571	23.8267	696	4.35696	142	3.11917	98	0.590785	23	1.12e-22	-2.2313	down	1.6e-15	-4.38661	down	0.00042367	2.07491	up	--	--	Molecular Function: metal ion binding (GO:0046872);;	--	--	--	--	--	--	--	--	hypothetical protein F0562_007198 [Nyssa sinensis]
Nn2g11967	Nn2g11967	15.1172	634	12.7887	520	8.93451	430	1.07143	43	0.801063	39	1.23632	57	0.087192	4	0.125786	6	0.090849	4	9.91e-32	-3.34243	down	8.87e-41	-6.24236	down	1.31e-06	2.72987	up	--	--	Molecular Function: molecular_function (GO:0003674);; Molecular Function: catalytic activity (GO:0003824);; Molecular Function: ubiquitin-protein transferase activity (GO:0004842);; Molecular Function: binding (GO:0005488);; Molecular Function: protein binding (GO:0005515);; Biological Process: regulation of transcription, DNA-templated (GO:0006355);; Biological Process: cellular protein modifica…	--	--	--	--	F-box-like	--	S	Function unknown	PREDICTED: F-box/kelch-repeat protein At3g61590-like [Nelumbo nucifera]
Nn2g11972	Nn2g11972	26.3378	648	39.7984	945	33.6324	948	4.60619	105	6.93325	193	8.72097	224	0.180018	6	0.353688	10	0.190978	5	6.95e-14	-2.15967	down	7.28e-55	-6.36059	down	5.37e-17	4.01166	up	--	--	Biological Process: microtubule-based process (GO:0007017);; Cellular Component: dynein complex (GO:0030286);;	K10418|9.6e-127|nnu:104595354|K10418 dynein light chain LC8-type | (RefSeq) uncharacterized LOC104595354	--	[Z]	Cytoskeleton	Dynein light chain type 1	--	Z	Cytoskeleton	PREDICTED: uncharacterized protein LOC104595354 [Nelumbo nucifera]
Nn2g11985	Nn2g11985	3.82628	224	3.53048	205	4.3127	291	0.50467	29	1.98259	132	1.01868	67	0	0	0.083935	5	0.045579	3	0.00136693	-1.49749	down	9.98e-27	-5.8459	down	2.53e-06	3.70222	up	[G]	Carbohydrate transport and metabolism	Molecular Function: polygalacturonase activity (GO:0004650);; Biological Process: carbohydrate metabolic process (GO:0005975);;	K01213|2.2e-268|nnu:104595358|K01213 galacturan 1,4-alpha-galacturonidase [EC:3.2.1.67] | (RefSeq) probable polygalacturonase At1g80170	Pentose and glucuronate interconversions (ko00040)	--	--	Glycosyl hydrolases family 28	Probable polygalacturonase At1g80170 OS=Arabidopsis thaliana OX=3702 GN=At1g80170 PE=1 SV=1	G	Carbohydrate transport and metabolism	PREDICTED: probable polygalacturonase At1g80170 [Nelumbo nucifera]
Nn2g12011	Nn2g12011	0.103845	3	0	0	0	0	11.8033	285	18.8727	544	10.9856	304	43.7203	1179	49.9764	1224	28.2502	733	2.08e-35	7.35468	up	5.34e-42	9.85239	up	1.96e-07	-1.81103	down	--	--	Cellular Component: integral component of membrane (GO:0016021);;	K14771|7.7e-18|egr:104415908|K14771 U3 small nucleolar RNA-associated protein 19 | (RefSeq) uncharacterized protein LOC104415908 isoform X1	--	--	--	Lytic transglycolase	EG45-like domain containing protein 2 OS=Arabidopsis thaliana OX=3702 GN=EGC2 PE=2 SV=2	S	Function unknown	PREDICTED: EG45-like domain containing protein [Nelumbo nucifera]
Nn2g12084	Nn2g12084	7.82988	321	7.10311	279	7.77487	381	21.3934	892	21.4694	1018	19.7376	938	51.5671	2355	33.6228	1416	33.7653	1513	1.1e-38	1.63724	up	8.88e-32	2.87462	up	1.47e-06	-1.23715	down	--	--	--	--	--	--	--	--	Protein POST-ILLUMINATION CHLOROPHYLL FLUORESCENCE INCREASE, chloroplastic OS=Arabidopsis thaliana OX=3702 GN=PIFI PE=2 SV=1	S	Function unknown	PREDICTED: uncharacterized protein LOC104586110 [Nelumbo nucifera]
Nn2g12127	Nn2g12127	0.41219	27	0.243521	16	0.339256	26	1.08612	67	2.26877	167	1.00134	71	6.51256	448	3.53284	221	2.33722	155	1.14e-05	2.09046	up	2.37e-16	3.959	up	0.00119587	-1.71841	down	--	--	--	--	--	--	--	BSD domain	--	--	--	PREDICTED: uncharacterized protein LOC104586137 [Nelumbo nucifera]
Nn2g12128	Nn2g12128	7.52423	572	7.02003	498	7.60328	636	19.224	1399	22.6882	1976	16.5879	1303	33.1533	2664	37.1104	2755	49.8296	3910	6.1e-17	1.54138	up	3.09e-58	2.89579	up	4.5e-08	-1.34222	down	--	--	Molecular Function: 1-phosphatidylinositol binding (GO:0005545);; Cellular Component: clathrin-coated vesicle (GO:0030136);; Molecular Function: clathrin binding (GO:0030276);; Biological Process: clathrin coat assembly (GO:0048268);;	K20043|2.0e-70|nnu:104586138|K20043 clathrin coat assembly protein AP180 | (RefSeq) putative clathrin assembly protein At5g35200	--	[TU]	Signal transduction mechanisms;; Intracellular trafficking, secretion, and vesicular transport	ANTH domain	Putative clathrin assembly protein At5g35200 OS=Arabidopsis thaliana OX=3702 GN=At5g35200 PE=1 SV=1	--	--	PREDICTED: putative clathrin assembly protein At5g35200 [Nelumbo nucifera]
Nn2g12132	Nn2g12132	2.3083	95	0.996855	40	1.53296	72	13.6476	530	12.382	574	11.001	489	2.61406	114	1.81101	72	6.19143	259	6.84e-25	2.98665	up	0.00605207	1.50648	up	0.00211225	1.43371	up	--	--	Cellular Component: integral component of membrane (GO:0016021);;	K18789|4.2e-121|cic:CICLE_v10010628mg|K18789 xylogalacturonan beta-1,3-xylosyltransferase [EC:2.4.2.41] | (RefSeq) hypothetical protein	--	[RT]	General function prediction only;; Signal transduction mechanisms	Haemolysin-III related	Heptahelical transmembrane protein 1 OS=Arabidopsis thaliana OX=3702 GN=HHP1 PE=1 SV=1	T	Signal transduction mechanisms	PREDICTED: heptahelical transmembrane protein 1-like [Nelumbo nucifera]
Nn2g12153	Nn2g12153	1.836	338	1.5483	282	1.71032	377	0.684252	115	0.682248	140	0.908662	193	0.252234	44	0.213653	35	0.319415	53	3.73e-06	-1.04236	down	9.33e-28	-2.44835	down	3.43e-05	1.36256	up	--	--	Cellular Component: integrator complex (GO:0032039);;	K13139|0.0e+00|nnu:104586155|K13139 integrator complex subunit 2 | (RefSeq) uncharacterized LOC104586155	--	--	--	Integrator complex subunit 2	--	S	Function unknown	PREDICTED: uncharacterized protein LOC104586155 isoform X1 [Nelumbo nucifera]
Nn2g12180	Nn2g12180	39.5025	913	36.8368	845	36.3284	959	160.347	3991	145.455	4351	197.195	5696	3.58406	91	6.36863	145	2.80207	70	3.67e-63	2.44909	up	5.61e-17	-2.65562	down	1.04e-54	5.01383	up	--	--	Cellular Component: photosystem I (GO:0009522);; Biological Process: photosynthesis (GO:0015979);;	K02701|3.4e-89|nnu:104588598|K02701 photosystem I subunit PsaN | (RefSeq) photosystem I reaction center subunit N, chloroplastic-like	Photosynthesis (ko00195)	--	--	Photosystem I reaction centre subunit N (PSAN or PSI-N)	Photosystem I reaction center subunit N, chloroplastic OS=Arabidopsis thaliana OX=3702 GN=PSAN PE=1 SV=2	S	Function unknown	PREDICTED: photosystem I reaction center subunit N, chloroplastic-like [Nelumbo nucifera]
Nn2g12216	Nn2g12216	41.1494	2656	32.031	2056	30.483	2302	5.6111	355	4.70737	360	7.04106	513	0.919505	67	1.02859	67	1.19722	83	4.42e-37	-2.39383	down	3.79e-126	-4.5474	down	2.14e-16	2.10487	up	--	--	Cellular Component: integral component of membrane (GO:0016021);;	--	--	--	--	--	--	--	--	PREDICTED: uncharacterized protein LOC104588579 [Nelumbo nucifera]
Nn2g12235	Nn2g12235	4.23423	183	4.94523	199	3.24597	150	14.7062	579	12.982	612	15.8803	708	0	0	0.204301	9	0	0	5.24e-18	1.89352	up	7.21e-08	-4.94034	down	0.000339004	3.87635	up	[E]	Amino acid transport and metabolism	Molecular Function: magnesium ion binding (GO:0000287);; Cellular Component: cytoplasm (GO:0005737);; Biological Process: L-methionine salvage from methylthioadenosine (GO:0019509);; Molecular Function: acireductone synthase activity (GO:0043874);;	K16054|1.7e-214|nnu:104603392|K16054 methylthioribulose 1-phosphate dehydratase / enolase-phosphatase E1 [EC:4.2.1.109 3.1.3.77] | (RefSeq) probable bifunctional methylthioribulose-1-phosphate dehydratase/enolase-phosphatase E1 1	Cysteine and methionine metabolism (ko00270)	[E]	Amino acid transport and metabolism	Class II Aldolase and Adducin N-terminal domain	Probable bifunctional methylthioribulose-1-phosphate dehydratase/enolase-phosphatase E1 1 OS=Vitis vinifera OX=29760 GN=VIT_19s0014g02480 PE=3 SV=2	--	--	PREDICTED: probable bifunctional methylthioribulose-1-phosphate dehydratase/enolase-phosphatase E1 1 [Nelumbo nucifera]
Nn2g12241	Nn2g12241	5.15016	324	5.13564	336	4.82132	373	0.458525	30	0.498472	39	0.835051	60	0.02221	2	0	0	0	0	3.33e-27	-2.85415	down	1.06e-22	-7.89493	down	6.31e-08	4.44836	up	--	--	--	--	--	--	--	--	--	--	--	PREDICTED: uncharacterized protein LOC104603390 [Nelumbo nucifera]
Nn2g12267	Nn2g12267	7.68095	543	8.23434	564	7.9428	644	3.18078	214	1.82961	147	3.29683	254	0.671289	51	0.863501	59	0.80836	59	9.7e-08	-1.37472	down	3.38e-53	-2.90739	down	1.98e-05	1.47136	up	--	--	Biological Process: cellular response to DNA damage stimulus (GO:0006974);;	K10140|1.1e-15|dcr:108209042|K10140 DNA damage-binding protein 2 | (RefSeq) protein DAMAGED DNA-BINDING 2	Nucleotide excision repair (ko03420);; Ubiquitin mediated proteolysis (ko04120)	[S]	Function unknown	--	--	S	Function unknown	PREDICTED: WD repeat-containing protein 76 [Nelumbo nucifera]
Nn2g12282	Nn2g12282	17.8251	958	13.6791	706	14.9434	933	39.4026	2079	36.2942	2258	29.2499	1796	102.711	6111	113.691	6261	114.118	6840	1.96e-15	1.34053	up	2.89e-146	3.34151	up	4.7e-33	-1.99343	down	--	--	--	K22763|2.9e-81|nnu:104603359|K22763 deubiquitinase DESI2 [EC:3.4.19.12] | (RefSeq) deSI-like protein At4g17486	--	[S]	Function unknown	PPPDE putative peptidase domain	DeSI-like protein At4g17486 OS=Arabidopsis thaliana OX=3702 GN=At4g17486 PE=2 SV=1	S	Function unknown	PREDICTED: deSI-like protein At4g17486 [Nelumbo nucifera]
Nn2g12323	Nn2g12323	26.4998	1181	26.0776	1052	24.8174	1208	6.26189	277	12.2019	621	7.53175	379	0.688202	28	0.178746	9	0.379884	19	4.74e-07	-1.32701	down	3.2e-75	-5.44531	down	7.74e-19	3.9408	up	--	--	Biological Process: regulation of immune system process (GO:0002682);; Biological Process: negative regulation of immune system process (GO:0002683);; Molecular Function: molecular_function (GO:0003674);; Molecular Function: catalytic activity (GO:0003824);; Molecular Function: ubiquitin-protein transferase activity (GO:0004842);; Molecular Function: receptor binding (GO:0005102);; Molecular Func…	K08332|4.0e-29|cpap:110808679|K08332 vacuolar protein 8 | (RefSeq) LOW QUALITY PROTEIN: U-box domain-containing protein 3	--	[S]	Function unknown	Armadillo/beta-catenin-like repeat	--	S	Function unknown	PREDICTED: U-box domain-containing protein 12-like [Nelumbo nucifera]
Nn2g12353	Nn2g12353	12.7144	989	8.98174	604	12.2094	1038	53.2139	3870	100.331	8750	54.4084	4543	242.786	19887	184.373	13876	147.745	11574	2.53e-20	2.72995	up	6.13e-60	4.5477	up	1.44e-06	-1.74257	down	--	--	Cellular Component: integral component of membrane (GO:0016021);; Molecular Function: oxidoreductase activity (GO:0016491);;	K00521|1.3e-95|nnu:104603300|K00521 ferric-chelate reductase [EC:1.16.1.7] | (RefSeq) ferric reduction oxidase 7, chloroplastic-like	--	[PQ]	Inorganic ion transport and metabolism;; Secondary metabolites biosynthesis, transport and catabolism	Ferric reductase like transmembrane component	Ferric reduction oxidase 7, chloroplastic OS=Arabidopsis thaliana OX=3702 GN=FRO7 PE=2 SV=1	--	--	PREDICTED: ferric reduction oxidase 7, chloroplastic-like [Nelumbo nucifera]
Nn2g12393	Nn2g12393	2.90639	253	1.87035	167	2.47749	278	9.00109	771	18.5417	2001	8.01789	867	40.3118	4033	31.5557	2897	11.6441	1087	1.15e-11	2.38528	up	2.39e-17	3.92516	up	0.00812438	-1.44894	down	--	--	Biological Process: auxin transport (GO:0060918);; Biological Process: plant organ development (GO:0099402);;	--	--	--	--	NPH3 family	BTB/POZ domain-containing protein NPY1 OS=Arabidopsis thaliana OX=3702 GN=NPY1 PE=2 SV=1	S	Function unknown	PREDICTED: BTB/POZ domain-containing protein NPY1-like [Nelumbo nucifera]
Nn2g12402	Nn2g12402	70.5196	1381	93.8806	1782	72.6677	1631	3.94511	74	2.89485	65	3.70494	79	0.634801	14	0.210896	4	0.568052	12	1.92e-87	-4.30441	down	1.28e-79	-6.79496	down	2.51e-06	2.37153	up	--	--	Molecular Function: electron carrier activity (GO:0009055);;	--	--	--	--	Plastocyanin-like domain	Early nodulin-like protein 1 OS=Arabidopsis thaliana OX=3702 GN=At2g25060 PE=2 SV=2	S	Function unknown	PREDICTED: early nodulin-like protein 1 [Nelumbo nucifera]
Nn2g12417	Nn2g12417	34.0402	3468	33.4247	3293	25.853	2996	3.90573	380	4.46086	512	3.53447	393	0.418391	46	0.936206	94	0.626765	66	2.51e-59	-2.8142	down	3.09e-65	-5.06931	down	2.87e-11	2.20909	up	[E]	Amino acid transport and metabolism	Molecular Function: aspartate kinase activity (GO:0004072);; Biological Process: cellular amino acid biosynthetic process (GO:0008652);; Molecular Function: oxidoreductase activity (GO:0016491);; Molecular Function: NADP binding (GO:0050661);;	K12524|0.0e+00|nnu:104603257|K12524 bifunctional aspartokinase / homoserine dehydrogenase 1 [EC:2.7.2.4 1.1.1.3] | (RefSeq) bifunctional aspartokinase/homoserine dehydrogenase 2, chloroplastic-like	Glycine, serine and threonine metabolism (ko00260);; Monobactam biosynthesis (ko00261);; Cysteine and methionine metabolism (ko00270);; Lysine biosynthesis (ko00300);; Biosynthesis of amino acids (ko01230)	--	--	Homoserine dehydrogenase	Bifunctional aspartokinase/homoserine dehydrogenase 2, chloroplastic OS=Arabidopsis thaliana OX=3702 GN=AKHSDH2 PE=1 SV=1	E	Amino acid transport and metabolism	PREDICTED: bifunctional aspartokinase/homoserine dehydrogenase 2, chloroplastic-like isoform X1 [Nelumbo nucifera]
Nn2g12438	Nn2g12438	2.68373	274	3.53857	318	2.75182	312	1.23699	108	0.854013	84	1.41919	150	0.011036	2	0	0	0	0	9.78e-06	-1.27706	down	3.68e-21	-7.70676	down	4.95e-15	5.79543	up	[N]	Cell motility	Cellular Component: plasma membrane (GO:0005886);; Cellular Component: integral component of membrane (GO:0016021);; Molecular Function: cellulose synthase (UDP-forming) activity (GO:0016760);; Biological Process: cellulose biosynthetic process (GO:0030244);; Molecular Function: metal ion binding (GO:0046872);; Biological Process: cell wall organization (GO:0071555);;	K10999|0.0e+00|nnu:104603242|K10999 cellulose synthase A [EC:2.4.1.12] | (RefSeq) cellulose synthase A catalytic subunit 7 [UDP-forming]-like	--	--	--	Cellulose synthase	Cellulose synthase A catalytic subunit 9 [UDP-forming] OS=Oryza sativa subsp. indica OX=39946 GN=CESA9 PE=2 SV=1	G	Carbohydrate transport and metabolism	PREDICTED: cellulose synthase A catalytic subunit 7 [UDP-forming]-like [Nelumbo nucifera]
Nn2g12466	Nn2g12466	2.4834	98	0.868027	34	2.07519	94	9.83918	368	7.45535	331	10.7246	460	0.123917	6	0.20227	9	0.56815	24	4.62e-11	2.39522	up	0.00293868	-1.98493	down	1.05e-21	4.32663	up	--	--	Molecular Function: DNA binding (GO:0003677);; Molecular Function: transcription factor activity, sequence-specific DNA binding (GO:0003700);; Cellular Component: nucleus (GO:0005634);;	K09285|2.3e-75|nnu:104589848|K09285 AP2-like factor, ANT lineage | (RefSeq) AP2-like ethylene-responsive transcription factor At1g16060	--	--	--	AP2 domain	AP2-like ethylene-responsive transcription factor At1g16060 OS=Arabidopsis thaliana OX=3702 GN=At1g16060 PE=2 SV=1	K	Transcription	PREDICTED: AP2-like ethylene-responsive transcription factor At1g16060 [Nelumbo nucifera]
Nn2g12468	Nn2g12468	23.1448	794	25.7249	852	21.5581	842	44.4481	1432	44.8169	1736	42.7616	1588	7.52867	271	6.67108	224	6.29927	225	4.4e-15	1.02179	up	2.09e-14	-1.33563	down	3.22e-52	2.34376	up	--	--	--	--	--	--	--	--	--	--	--	PREDICTED: uncharacterized protein LOC104589845 [Nelumbo nucifera]
Nn2g12488	Nn2g12488	1.09941	90	1.22181	97	1.10069	103	0.428761	34	0.629456	59	0.364765	33	0.095567	9	0.047655	4	0.13794	12	0.00233604	-1.07791	down	7.02e-12	-3.03502	down	0.00193276	1.822	up	--	--	Molecular Function: zinc ion binding (GO:0008270);;	K22262|4.5e-114|qsu:112034235|K22262 WD repeat and FYVE domain-containing protein 3 | (RefSeq) protein SPIRRIG	--	[R]	General function prediction only	PPR repeat family	Putative pentatricopeptide repeat-containing protein At3g25970 OS=Arabidopsis thaliana OX=3702 GN=PCMP-E46 PE=3 SV=2	L	Replication, recombination and repair	PREDICTED: putative pentatricopeptide repeat-containing protein At3g25970 [Nelumbo nucifera]
Nn2g12489	Nn2g12489	8.0023	233	11.3997	320	21.3586	713	33.2523	919	65.9282	2164	32.3336	1024	0.25637	8	0.704229	20	2.78945	83	5.07e-05	1.72238	up	0.000115136	-2.8901	down	7.45e-11	4.32935	up	[F]	Nucleotide transport and metabolism	Biological Process: glutamine metabolic process (GO:0006541);;	K22314|3.0e-93|nnu:104589831|K22314 glucosinolate gamma-glutamyl hydrolase [EC:3.4.19.16] | (RefSeq) gamma-glutamyl peptidase 3-like	--	[F]	Nucleotide transport and metabolism	Glutamine amidotransferase class-I	Gamma-glutamyl peptidase 3 OS=Arabidopsis thaliana OX=3702 GN=GGP3 PE=1 SV=1	F	Nucleotide transport and metabolism	PREDICTED: gamma-glutamyl peptidase 3-like [Nelumbo nucifera]
Nn2g12542	Nn2g12542	1.1874	12	1.51851	14	1.25537	14	15.5621	139	13.4998	144	5.27264	54	16.264	162	49.4747	447	34.1363	327	8.07e-09	2.94489	up	1.51e-24	4.90196	up	0.00147767	-1.71701	down	--	--	--	--	--	--	--	--	--	--	--	hypothetical protein CK203_040911 [Vitis vinifera]
Nn2g12552	Nn2g12552	81.1944	4572	110.151	5948	79.1961	4930	341.164	18279	242.425	15556	252.087	15931	807.143	46840	748.45	38402	449.044	25071	1.35e-16	1.76272	up	2e-27	3.25676	up	1.74e-06	-1.4758	down	--	--	Molecular Function: iron ion binding (GO:0005506);; Biological Process: lipid biosynthetic process (GO:0008610);; Cellular Component: integral component of membrane (GO:0016021);; Molecular Function: oxidoreductase activity (GO:0016491);;	--	--	--	--	--	Very-long-chain aldehyde decarbonylase GL1-3 OS=Oryza sativa subsp. japonica OX=39947 GN=GL1-3 PE=2 SV=2	S	Function unknown	PREDICTED: protein ECERIFERUM 3 [Nelumbo nucifera]
Nn2g12566	Nn2g12566	7.32972	405	6.89089	369	9.75969	618	45.9483	2408	22.3555	1401	31.8027	1909	70.1723	4117	68.4514	3647	50.0319	2822	9.96e-14	2.13216	up	5.35e-45	3.38673	up	0.000338567	-1.20222	down	--	--	Cellular Component: integral component of membrane (GO:0016021);;	K10663|7.4e-28|atr:18429082|K10663 E3 ubiquitin-protein ligase ATL4 [EC:2.3.2.27] | (RefSeq) putative RING-H2 finger protein ATL49	--	[O]	Posttranslational modification, protein turnover, chaperones	Ring finger domain	RING-H2 finger protein ATL13 OS=Arabidopsis thaliana OX=3702 GN=ATL13 PE=2 SV=2	O	Posttranslational modification, protein turnover, chaperones	PREDICTED: RING-H2 finger protein ATL13-like [Nelumbo nucifera]
Nn2g12574	Nn2g12574	0.08843	8	0.064964	6	0.019879	3	0.869387	73	1.05186	105	0.519143	47	1.43789	135	1.95222	165	2.42596	210	7.7e-10	3.44209	up	5.2e-30	5.24139	up	0.000113714	-1.49466	down	--		Molecular Function: protein kinase activity (GO:0004672);; Molecular Function: ATP binding (GO:0005524);; Cellular Component: integral component of membrane (GO:0016021);;	K24104|1.0e-80|thj:104799061|K24104 GPN-loop GTPase | (RefSeq) LOW QUALITY PROTEIN: uncharacterized protein LOC104799061	--	--	--	Protein tyrosine and serine/threonine kinase	Cysteine-rich receptor-like protein kinase 25 OS=Arabidopsis thaliana OX=3702 GN=CRK25 PE=3 SV=1	T	Signal transduction mechanisms	PREDICTED: putative receptor-like protein kinase At4g00960 [Nelumbo nucifera]
Nn2g12575	Nn2g12575	0.016572	2	0	0	0.012997	2	1.33344	127	0.891132	103	0.68539	77	7.13122	772	12.3981	1215	7.32745	762	7.22e-18	5.42587	up	4.02e-44	9.3998	up	1.26e-22	-3.42047	down	[O]	Posttranslational modification, protein turnover, chaperones	Molecular Function: protein serine/threonine kinase activity (GO:0004674);; Molecular Function: ATP binding (GO:0005524);; Cellular Component: integral component of membrane (GO:0016021);;	K00924|1.6e-113|nnu:104604480|K00924 kinase [EC:2.7.1.-] | (RefSeq) receptor-like protein kinase HSL1	--	--	--	Leucine rich repeat	LRR receptor-like serine/threonine-protein kinase HSL2 OS=Arabidopsis thaliana OX=3702 GN=HSL2 PE=1 SV=1	T	Signal transduction mechanisms	PREDICTED: receptor-like protein kinase 5 [Nelumbo nucifera]
Nn2g12578	Nn2g12578	2.78406	93	1.34953	44	1.45951	56	5.44122	173	5.5409	210	4.68536	171	9.41884	335	14.1931	458	9.16978	313	3.42e-06	1.57267	up	1.83e-16	2.94934	up	4.79e-07	-1.35003	down	--	--	Cellular Component: integral component of membrane (GO:0016021);;	--	--	--	--	--	--	--	--	PREDICTED: uncharacterized protein LOC104612387 [Nelumbo nucifera]
Nn2g12600	Nn2g12600	4.84737	166	4.82841	161	5.27346	212	48.6726	1480	25.4987	1035	38.3641	1381	84.8943	3295	85.8717	2715	99.5082	3729	1.08e-37	2.93169	up	3.19e-186	4.61961	up	1.1e-10	-1.6405	down	--	--	Biological Process: carbohydrate transport (GO:0008643);; Cellular Component: integral component of membrane (GO:0016021);;	K15281|2.5e-145|nnu:104612366|K15281 solute carrier family 35 | (RefSeq) putative UDP-sugar transporter DDB_G0278631	--	[GOU]	Carbohydrate transport and metabolism;; Posttranslational modification, protein turnover, chaperones;; Intracellular trafficking, secretion, and vesicular transport	--	UDP-galactose/UDP-glucose transporter 7 OS=Arabidopsis thaliana OX=3702 GN=UTR7 PE=1 SV=1	--	--	PREDICTED: putative UDP-sugar transporter DDB_G0278631 [Nelumbo nucifera]
Nn2g12602	Nn2g12602	6.65888	492	7.0232	460	6.47864	499	23.3646	1620	23.861	1927	20.2489	1610	61.7225	4477	39.9443	2762	42.7963	2912	2.63e-49	1.91869	up	4.31e-44	3.2419	up	1.54e-07	-1.32244	down	--	--	Cellular Component: integral component of membrane (GO:0016021);;	K15015|3.3e-242|nnu:104612368|K15015 solute carrier family 32 (vesicular inhibitory amino acid transporter) | (RefSeq) vacuolar amino acid transporter 1	--	[E]	Amino acid transport and metabolism	Transmembrane amino acid transporter protein	Amino acid transporter AVT1A OS=Arabidopsis thaliana OX=3702 GN=AVT1A PE=2 SV=2	E	Amino acid transport and metabolism	PREDICTED: vacuolar amino acid transporter 1 isoform X1 [Nelumbo nucifera]
Nn2g12634	Nn2g12634	0.267628	8	0.084297	4	0.150191	4	1.24779	32	2.43583	91	1.34594	41	3.6509	143	3.76011	137	3.39551	119	8.72e-07	3.02689	up	1.4e-28	4.99864	up	0.000192957	-1.61219	down	--	--	Molecular Function: GTP binding (GO:0005525);;	--	--	--	--	AIG1 family	Immune-associated nucleotide-binding protein 10 OS=Arabidopsis thaliana OX=3702 GN=IAN10 PE=3 SV=1	S	Function unknown	PREDICTED: immune-associated nucleotide-binding protein 8-like isoform X1 [Nelumbo nucifera]
Nn2g12647	Nn2g12647	8.68141	448	10.5486	528	8.3632	495	1.03208	51	0.631063	37	1.17133	66	0	0	0.025309	2	0.031489	2	1.19e-29	-3.09195	down	2.97e-31	-7.6938	down	1.12e-08	4.18604	up	[S]	Function unknown	Cellular Component: extracellular region (GO:0005576);;	K13449|6.3e-40|egu:105031941|K13449 pathogenesis-related protein 1 | (RefSeq) pathogenesis-related protein PRB1-3-like	MAPK signaling pathway - plant (ko04016);; Plant hormone signal transduction (ko04075);; Plant-pathogen interaction (ko04626)	[S]	Function unknown	Cysteine-rich secretory protein family	Pathogenesis-related protein PR-1 OS=Medicago truncatula OX=3880 GN=PR-1 PE=2 SV=1	S	Function unknown	PREDICTED: pathogenesis-related protein PR-1-like [Nelumbo nucifera]
Nn2g12699	Nn2g12699	0.610602	46	0.476232	34	0.507802	35	1.94989	144	2.45566	213	1.55695	133	3.41115	284	5.45873	414	6.1804	499	4.91e-11	2.11943	up	1.05e-33	3.79415	up	2.81e-07	-1.62191	down	[IQ]	Lipid transport and metabolism;; Secondary metabolites biosynthesis, transport and catabolism	Molecular Function: ligase activity (GO:0016874);;	K01904|5.7e-311|nnu:104599133|K01904 4-coumarate--CoA ligase [EC:6.2.1.12] | (RefSeq) 4-coumarate--CoA ligase 2-like	Ubiquinone and other terpenoid-quinone biosynthesis (ko00130);; Phenylpropanoid biosynthesis (ko00940)	[I]	Lipid transport and metabolism	AMP-binding enzyme	4-coumarate--CoA ligase 2 OS=Nicotiana tabacum OX=4097 GN=4CL2 PE=1 SV=1	I	Lipid transport and metabolism	PREDICTED: 4-coumarate--CoA ligase 2-like [Nelumbo nucifera]
Nn2g12701	Nn2g12701	2.92997	42	2.39025	33	4.397	71	12.4069	166	10.8155	173	10.7722	165	15.1621	226	21.7874	295	36.5911	525	1.22e-09	1.86356	up	8.48e-16	3.25902	up	0.000169609	-1.36544	down	--	--	--	--	--	--	--	Cotton fibre expressed protein	--	S	Function unknown	PREDICTED: uncharacterized protein LOC109114828 [Nelumbo nucifera]
Nn2g12747	Nn2g12747	25.3659	1243	23.7418	1130	22.3174	1258	3.71917	177	1.92599	109	3.90273	210	0.127171	6	0.13984	8	0.164826	8	1.13e-24	-2.70667	down	4.84e-93	-6.83824	down	5.57e-16	3.9153	up	--	--	--	--	--	--	--	Protein of unknown function (DUF1666)	--	S	Function unknown	PREDICTED: uncharacterized protein LOC104599166 [Nelumbo nucifera]
Nn2g12796	Nn2g12796	277.165	10985	287.685	11054	252.1	11455	127.626	4805	113.518	5108	119.88	5170	51.4789	2170	31.6771	1213	28.5023	1155	3.03e-22	-1.05001	down	2.1e-17	-2.41444	down	8.77e-06	1.34404	up	--	--	--	--	--	--	--	--	--	--	--	hypothetical protein F0562_021915 [Nyssa sinensis]
Nn2g12811	Nn2g12811	62.9133	2994	52.5026	2815	62.7646	3986	32.7146	1476	28.7523	1792	22.1389	1182	133.642	7005	99.1839	5299	48.2959	2728	3.47e-07	-1.01356	down	0.00334201	1.08095	up	1.42e-07	-2.05681	down	[O]	Posttranslational modification, protein turnover, chaperones	Molecular Function: molecular_function (GO:0003674);; Molecular Function: catalytic activity (GO:0003824);; Molecular Function: glutathione transferase activity (GO:0004364);; Molecular Function: protein binding (GO:0005515);; Cellular Component: cellular_component (GO:0005575);; Cellular Component: intracellular (GO:0005622);; Cellular Component: cell (GO:0005623);; Cellular Component: cytoplasm…	K00799|7.4e-135|nnu:104599214|K00799 glutathione S-transferase [EC:2.5.1.18] | (RefSeq) protein IN2-1 homolog B-like	Glutathione metabolism (ko00480)	[O]	Posttranslational modification, protein turnover, chaperones	Glutathione S-transferase, N-terminal domain	Glutathione S-transferase L3 OS=Arabidopsis thaliana OX=3702 GN=GSTL3 PE=2 SV=1	O	Posttranslational modification, protein turnover, chaperones	PREDICTED: protein IN2-1 homolog B-like isoform X1 [Nelumbo nucifera]
Nn2g12816	Nn2g12816	25.5814	2754	30.1069	3190	21.2688	2667	4.20874	402	3.67386	373	4.17274	450	2.4717	156	2.34354	132	1.19771	83	6.7e-45	-2.69465	down	4.21e-43	-4.05458	down	3.86e-05	1.32776	up	--	--	Molecular Function: microtubule motor activity (GO:0003777);; Molecular Function: ATP binding (GO:0005524);; Biological Process: microtubule-based movement (GO:0007018);; Molecular Function: microtubule binding (GO:0008017);;	K10398|0.0e+00|nnu:104599219|K10398 kinesin family member 11 | (RefSeq) kinesin-like protein KIN-5D	--	[Z]	Cytoskeleton	Kinesin motor domain	Kinesin-like protein KIN-5D OS=Arabidopsis thaliana OX=3702 GN=KIN5D PE=3 SV=1	Z	Cytoskeleton	PREDICTED: kinesin-like protein KIN-5D [Nelumbo nucifera]
Nn2g12819	Nn2g12819	34.0362	1200	17.8182	605	24.7671	1013	4.45424	153	3.64132	148	4.54415	182	0.163874	12	0.116014	8	0.391303	20	4.69e-20	-2.38215	down	2.87e-46	-5.59653	down	9.47e-16	3.12834	up	--	--	Cellular Component: nucleus (GO:0005634);;	--	--	--	--	--	--	K	Transcription	PREDICTED: two-component response regulator-like APRR1 isoform X1 [Nelumbo nucifera]
Nn2g12825	Nn2g12825	21.5823	1230	12.6779	543	15.3395	931	74.7641	4436	95.2782	6904	55.5638	3137	528.098	38884	430.606	29852	188.502	14298	5.64e-13	2.44804	up	7.14e-36	5.327	up	2.72e-10	-2.77525	down	[V]	Defense mechanisms	Molecular Function: ATP binding (GO:0005524);; Cellular Component: integral component of membrane (GO:0016021);; Molecular Function: ATPase activity (GO:0016887);;	K05681|2.2e-92|var:108331191|K05681 ATP-binding cassette, subfamily G (WHITE), member 2 | (RefSeq) ABC transporter G family member 5-like	ABC transporters (ko02010)	[Q]	Secondary metabolites biosynthesis, transport and catabolism	ABC-2 type transporter	ABC transporter G family member 6 OS=Arabidopsis thaliana OX=3702 GN=ABCG6 PE=2 SV=1	Q	Secondary metabolites biosynthesis, transport and catabolism	PREDICTED: ABC transporter G family member 6-like [Nelumbo nucifera]
Nn2g12832	Nn2g12832	7.02121	181	6.48972	159	5.52274	163	13.6125	312	15.6274	473	11.5299	323	21.0172	585	21.0596	516	24.0429	677	1.04e-07	1.21078	up	1.29e-39	2.26296	up	2.66e-06	-1.04037	down	--	--	--	--	--	--	--	--	--	--	--	PREDICTED: uncharacterized protein LOC104599235 [Nelumbo nucifera]
Nn2g12878	Nn2g12878	12.1026	673	12.6083	682	10.7753	689	60.1475	3178	63.4393	4030	52.9292	3232	111.242	6623	113.056	6114	94.5939	5420	2e-69	2.43223	up	5.67e-115	3.59603	up	2.27e-11	-1.16063	down	[H]	Coenzyme transport and metabolism	Molecular Function: GTP cyclohydrolase II activity (GO:0003935);; Molecular Function: 3,4-dihydroxy-2-butanone-4-phosphate synthase activity (GO:0008686);; Biological Process: riboflavin biosynthetic process (GO:0009231);;	K14652|4.4e-241|nnu:104599270|K14652 3,4-dihydroxy 2-butanone 4-phosphate synthase / GTP cyclohydrolase II [EC:4.1.99.12 3.5.4.25] | (RefSeq) monofunctional riboflavin biosynthesis protein RIBA 3, chloroplastic	Riboflavin metabolism (ko00740);; Folate biosynthesis (ko00790)	[H]	Coenzyme transport and metabolism	GTP cyclohydrolase II	Monofunctional riboflavin biosynthesis protein RIBA 3, chloroplastic OS=Arabidopsis thaliana OX=3702 GN=RIBA3 PE=1 SV=1	H	Coenzyme transport and metabolism	PREDICTED: monofunctional riboflavin biosynthesis protein RIBA 3, chloroplastic isoform X1 [Nelumbo nucifera]
Nn2g12893	Nn2g12893	111.503	3436	123.927	3702	93.9428	3319	4.1791	123	2.71363	95	4.01998	135	0.098088	4	0.033612	1	0.102032	4	1.27e-115	-4.73216	down	3e-86	-9.50699	down	2.53e-16	4.55976	up	--	--	Cellular Component: nucleosome (GO:0000786);; Molecular Function: DNA binding (GO:0003677);; Cellular Component: nucleus (GO:0005634);; Molecular Function: protein heterodimerization activity (GO:0046982);;	K11252|8.7e-59|nnu:104599285|K11252 histone H2B | (RefSeq) histone H2B-like	--	[B]	Chromatin structure and dynamics	Core histone H2A/H2B/H3/H4	Histone H2B OS=Gossypium hirsutum OX=3635 GN=HIS2B PE=2 SV=3	B	Chromatin structure and dynamics	PREDICTED: histone H2B-like [Nelumbo nucifera]
Nn2g12901	Nn2g12901	0.281762	18	0.207766	13	0.206714	15	1.61898	97	1.19973	86	0.638681	44	2.02951	136	1.61128	98	5.75428	369	5.05e-06	2.25704	up	5.44e-13	4.01984	up	0.00631582	-1.60323	down	[GI]	Carbohydrate transport and metabolism;; Lipid transport and metabolism	Molecular Function: enzyme inhibitor activity (GO:0004857);; Molecular Function: pectinesterase activity (GO:0030599);; Biological Process: cell wall modification (GO:0042545);; Molecular Function: aspartyl esterase activity (GO:0045330);; Biological Process: pectin catabolic process (GO:0045490);;	K01051|1.2e-268|nnu:104594609|K01051 pectinesterase [EC:3.1.1.11] | (RefSeq) probable pectinesterase/pectinesterase inhibitor 41	Pentose and glucuronate interconversions (ko00040)	--	--	Pectinesterase	Probable pectinesterase/pectinesterase inhibitor 7 OS=Arabidopsis thaliana OX=3702 GN=PME7 PE=2 SV=1	G	Carbohydrate transport and metabolism	PREDICTED: probable pectinesterase/pectinesterase inhibitor 41 [Nelumbo nucifera]
Nn2g12940	Nn2g12940	5.5287	521	6.67323	501	6.01882	681	15.8431	1528	14.9128	1664	13.1609	1456	40.8364	4305	30.9687	3066	34.8669	3554	5.75e-28	1.55107	up	2.56e-73	3.13329	up	5.43e-17	-1.57927	down	--	--	Molecular Function: protein serine/threonine phosphatase activity (GO:0004722);; Molecular Function: metal ion binding (GO:0046872);;	K01102|1.7e-218|nnu:104599323|K01102 pyruvate dehydrogenase phosphatase [EC:3.1.3.43] | (RefSeq) probable protein phosphatase 2C 38	--	[T]	Signal transduction mechanisms	Protein phosphatase 2C	Probable protein phosphatase 2C 38 OS=Arabidopsis thaliana OX=3702 GN=PP2C38 PE=1 SV=1	T	Signal transduction mechanisms	PREDICTED: probable protein phosphatase 2C 38 isoform X1 [Nelumbo nucifera]
Nn2g12979	Nn2g12979	10.5246	636	15.375	921	15.5314	1103	5.38758	315	5.51667	387	5.78176	390	1.68483	109	1.89735	109	1.89867	118	2.73e-07	-1.16936	down	9.35e-24	-2.51197	down	7.91e-14	1.32291	up	--	--	Cellular Component: integral component of membrane (GO:0016021);; Molecular Function: transmembrane transporter activity (GO:0022857);;	K14638|0.0e+00|nnu:104588672|K14638 solute carrier family 15 (peptide/histidine transporter), member 3/4 | (RefSeq) protein NRT1/ PTR FAMILY 2.7-like	--	[E]	Amino acid transport and metabolism	POT family	Protein NRT1/ PTR FAMILY 2.7 OS=Arabidopsis thaliana OX=3702 GN=NPF2.7 PE=1 SV=1	E	Amino acid transport and metabolism	PREDICTED: protein NRT1/ PTR FAMILY 2.7-like [Nelumbo nucifera]
Nn2g13029	Nn2g13029	0.187508	9	0.018379	2	0.064616	7	22.2483	312	22.0846	380	6.04244	105	98.5799	1527	200.5	2901	132.38	1984	3.25e-18	4.99859	up	1.84e-77	8.7591	up	9.59e-11	-3.18568	down	--	--	--	--	--	--	--	--	--	--	--	PREDICTED: uncharacterized protein LOC109115044 [Nelumbo nucifera]
Nn2g13038	Nn2g13038	2.86452	148	3.60498	181	3.41876	203	6.93615	341	5.60921	329	6.51154	366	1.00494	56	0.813144	41	0.86932	46	2.52e-07	1.05378	up	1.27e-07	-1.43182	down	3.5e-24	2.46503	up	--	--	--	--	--	--	--	--	--	--	--	PREDICTED: uncharacterized protein LOC104602661 [Nelumbo nucifera]
Nn2g13072	Nn2g13072	9.16998	368	4.93229	192	10.0455	462	1.6786	64	0.839624	39	2.2696	99	0.031943	2	0.076725	3	0	0	4.69e-07	-2.09787	down	1.47e-23	-6.83319	down	9.84e-09	4.23482	up	--	--	--	--	--	--	--	Root cap	--	S	Function unknown	PREDICTED: uncharacterized protein LOC104602642 [Nelumbo nucifera]
Nn2g13079	Nn2g13079	31.4243	852	38.9076	1026	28.7869	899	133.623	3451	101.358	3129	150.808	4463	0.70446	22	0.275529	8	0.543367	16	9.27e-24	2.05659	up	1.9e-58	-5.4187	down	2.95e-108	7.3492	up	--	--	Cellular Component: photosystem I (GO:0009522);; Cellular Component: photosystem II (GO:0009523);; Cellular Component: chloroplast thylakoid membrane (GO:0009535);; Biological Process: photosynthesis, light harvesting (GO:0009765);; Cellular Component: integral component of membrane (GO:0016021);; Molecular Function: chlorophyll binding (GO:0016168);; Biological Process: protein-chromophore linka…	K08907|9.4e-141|nnu:104602638|K08907 light-harvesting complex I chlorophyll a/b binding protein 1 | (RefSeq) chlorophyll a-b binding protein 6A, chloroplastic-like	Photosynthesis - antenna proteins (ko00196)	--	--	Chlorophyll A-B binding protein	Chlorophyll a-b binding protein 6A, chloroplastic OS=Solanum lycopersicum OX=4081 GN=CAB6A PE=2 SV=1	C	Energy production and conversion	PREDICTED: chlorophyll a-b binding protein 6A, chloroplastic-like [Nelumbo nucifera]
Nn2g13096	Nn2g13096	0.326431	43	0.750614	95	0.381867	57	4.62453	569	8.24666	1213	1.48381	210	77.0331	10605	53.314	6666	25.9386	3433	2.21e-08	3.09984	up	9.75e-48	7.00605	up	7.6e-09	-3.45357	down	--	--	--	--	--	--	--	--	--	--	--	hypothetical protein CISIN_1g048553mg, partial [Citrus sinensis]
Nn2g13100	Nn2g13100	2.23165	42	1.88891	35	3.2275	70	5.61884	101	12.3529	264	3.18355	66	49.6681	993	32.3227	587	25.302	487	0.00528796	1.52241	up	3.47e-30	4.23778	up	2.01e-06	-2.49207	down	--	--	--	K20855|1.4e-10|pavi:110763119|K20855 beta-1,3-galactosyltransferase 1/2/3/4/5/7/8 [EC:2.4.1.-] | (RefSeq) probable beta-1,3-galactosyltransferase 2	--	--	--	Senescence regulator	--	S	Function unknown	PREDICTED: uncharacterized protein LOC104602622 [Nelumbo nucifera]
Nn2g13124	Nn2g13124	2.52678	61	0.903497	22	1.47648	41	30.5436	688	40.7563	1096	26.1744	677	3.42315	88	3.60402	83	3.55003	87	6.97e-37	4.2662	up	0.000273441	1.50021	up	7.81e-29	2.83756	up	[R]	General function prediction only	Biological Process: cytokinin biosynthetic process (GO:0009691);; Molecular Function: hydrolase activity (GO:0016787);;	K22522|3.6e-120|nnu:104602606|K22522 cytokinin riboside 5'-monophosphate phosphoribohydrolase [EC:3.2.2.-] | (RefSeq) cytokinin riboside 5'-monophosphate phosphoribohydrolase LOG1-like	--	--	--	Possible lysine decarboxylase	Cytokinin riboside 5'-monophosphate phosphoribohydrolase LOG1 OS=Arabidopsis thaliana OX=3702 GN=LOG1 PE=1 SV=1	G	Carbohydrate transport and metabolism	PREDICTED: cytokinin riboside 5'-monophosphate phosphoribohydrolase LOG1-like isoform X1 [Nelumbo nucifera]
Nn2g13128	Nn2g13128	34.3932	978	31.9825	879	28.9399	952	110.535	3001	103.269	3347	105.593	3280	8.6303	258	8.55257	238	7.05817	209	3.02e-74	1.86985	up	3.62e-20	-1.53498	down	1.39e-103	3.38591	up	[J]	Translation, ribosomal structure and biogenesis	Molecular Function: RNA binding (GO:0003723);;	K11294|4.1e-145|nnu:104602604|K11294 nucleolin | (RefSeq) 29 kDa ribonucleoprotein A, chloroplastic-like	--	[R]	General function prediction only	RNA recognition motif. (a.k.a. RRM, RBD, or RNP domain)	29 kDa ribonucleoprotein A, chloroplastic OS=Nicotiana sylvestris OX=4096 PE=2 SV=1	A	RNA processing and modification	PREDICTED: 29 kDa ribonucleoprotein A, chloroplastic-like [Nelumbo nucifera]
Nn2g13149	Nn2g13149	21.9533	1245	35.1657	1985	26.8234	1809	86.2245	4679	187.188	12046	79.1377	4926	313.248	18600	379.902	20505	208.05	12147	8.04e-09	2.08753	up	3.86e-34	3.76859	up	0.000168141	-1.5841	down	[I]	Lipid transport and metabolism	Biological Process: lipid metabolic process (GO:0006629);; Cellular Component: integral component of membrane (GO:0016021);; Molecular Function: oxidoreductase activity, acting on paired donors, with oxidation of a pair of donors resulting in the reduction of molecular oxygen to two molecules of water (GO:0016717);;	K10257|6.0e-134|nnu:104602583|K10257 acyl-lipid omega-3 desaturase [EC:1.14.19.25 1.14.19.35 1.14.19.36] | (RefSeq) omega-3 fatty acid desaturase, chloroplastic-like	--	--	--	Domain of unknown function (DUF3474)	Omega-3 fatty acid desaturase, chloroplastic OS=Sesamum indicum OX=4182 GN=FAD7 PE=2 SV=1	I	Lipid transport and metabolism	PREDICTED: omega-3 fatty acid desaturase, chloroplastic-like [Nelumbo nucifera]
Nn2g13152	Nn2g13152	20.6451	822	15.1825	586	25.1332	1089	39.9346	1473	44.2858	1954	31.4447	1360	335.569	14479	329.719	12827	181.353	7204	3.36e-06	1.04419	up	1.85e-38	4.2328	up	1.82e-22	-3.15031	down	[I]	Lipid transport and metabolism	Molecular Function: acyl-CoA dehydrogenase activity (GO:0003995);; Molecular Function: flavin adenine dinucleotide binding (GO:0050660);;	K00232|3.2e-218|nnu:104602580|K00232 acyl-CoA oxidase [EC:1.3.3.6] | (RefSeq) acyl-coenzyme A oxidase 4, peroxisomal-like	Fatty acid degradation (ko00071);; beta-Alanine metabolism (ko00410);; alpha-Linolenic acid metabolism (ko00592);; Propanoate metabolism (ko00640);; Biosynthesis of unsaturated fatty acids (ko01040);; Carbon metabolism (ko01200);; Fatty acid metabolism (ko01212);; Peroxisome (ko04146)	[E]	Amino acid transport and metabolism	Acyl-CoA dehydrogenase, C-terminal domain	Acyl-coenzyme A oxidase 4, peroxisomal OS=Arabidopsis thaliana OX=3702 GN=ACX4 PE=1 SV=1	E	Amino acid transport and metabolism	PREDICTED: acyl-coenzyme A oxidase 4, peroxisomal-like [Nelumbo nucifera]
Nn2g13156	Nn2g13156	6.07306	267	6.51079	277	6.19849	312	0.956091	40	0.774482	39	0.738226	36	0.164614	8	0.20617	9	0.119505	6	5.16e-32	-2.74929	down	1.81e-38	-4.70194	down	0.000389476	1.84582	up	--	--	Cellular Component: integral component of membrane (GO:0016021);;	K23877|7.7e-44|thj:104822059|K23877 xyloglucan O-acetyltransferase | (RefSeq) protein ALTERED XYLOGLUCAN 4-like	--	--	--	GDSL/SGNH-like Acyl-Esterase family found in Pmr5 and Cas1p	Protein PMR5 OS=Arabidopsis thaliana OX=3702 GN=PMR5 PE=2 SV=1	S	Function unknown	PREDICTED: protein PMR5 [Nelumbo nucifera]
Nn2g13182	Nn2g13182	1.99949	76	0.981215	38	1.57386	68	6.17529	205	6.49002	263	6.71553	233	0.023505	2	0.052469	3	0	0	3.24e-13	2.01001	up	8.73e-09	-4.42549	down	6.87e-28	6.16101	up	--	--	Molecular Function: protein dimerization activity (GO:0046983);;	K22484|5.3e-06|gab:108472703|K22484 transcriptional regulator CBF1 | (RefSeq) transcription factor bHLH106	--	--	--	Helix-loop-helix DNA-binding domain	Transcription factor AIG1 OS=Arabidopsis thaliana OX=3702 GN=BHLH32 PE=1 SV=1	K	Transcription	PREDICTED: transcription factor bHLH51-like [Nelumbo nucifera]
Nn2g13187	Nn2g13187	2.04599	169	1.86314	150	1.86676	177	0.534809	42	0.557438	53	0.857343	77	0.059719	6	0.044616	4	0.09973	9	6.76e-07	-1.40539	down	2.1e-24	-4.18543	down	1.17e-06	2.62388	up	--	--	Biological Process: reproduction (GO:0000003);; Biological Process: regionalization (GO:0003002);; Biological Process: developmental process involved in reproduction (GO:0003006);; Cellular Component: cellular_component (GO:0005575);; Cellular Component: cell (GO:0005623);; Cellular Component: plasma membrane (GO:0005886);; Biological Process: transport (GO:0006810);; Biological Process: multicel…	--	--	--	--	Protein of unknown function (DUF740)	Protein OCTOPUS-like OS=Arabidopsis thaliana OX=3702 GN=OPSL1 PE=2 SV=1	S	Function unknown	PREDICTED: UPF0503 protein At3g09070, chloroplastic-like [Nelumbo nucifera]
Nn2g13203	Nn2g13203	0.789223	22	1.02974	28	0.642249	21	4.0732	106	3.34988	105	2.58015	77	21.597	629	23.2836	616	20.1495	564	1.2e-07	2.03134	up	1.11e-90	5.09255	up	2.07e-36	-2.97157	down	--	--	Molecular Function: nucleic acid binding (GO:0003676);; Molecular Function: zinc ion binding (GO:0008270);;	K04536|2.7e-07|egu:105055855|K04536 guanine nucleotide-binding protein G(I)/G(S)/G(T) subunit beta-1 | (RefSeq) LOW QUALITY PROTEIN: guanine nucleotide-binding protein subunit beta	--	--	--	gag-polypeptide of LTR copia-type	--	S	Function unknown	PREDICTED: uncharacterized protein LOC104602546 [Nelumbo nucifera]
Nn2g13221	Nn2g13221	5.59095	298	6.24217	321	4.95026	300	2.1065	100	2.32977	136	2.02501	117	0.047141	3	0	0	0.14027	6	1.01e-09	-1.27829	down	1.37e-30	-6.06168	down	2.34e-16	4.55126	up	--	--	Cellular Component: outer membrane (GO:0019867);;	K07277|2.2e-13|nnu:104597307|K07277 outer membrane protein insertion porin family | (RefSeq) uncharacterized LOC104597307	--	[R]	General function prediction only	--	--	M	Cell wall/membrane/envelope biogenesis	PREDICTED: uncharacterized protein LOC104597307 [Nelumbo nucifera]
Nn2g13268	Nn2g13268	37.4043	2254	37.7495	2206	37.2792	2577	11.0696	633	7.18722	491	11.0796	724	0.02453	2	0.127104	6	0.058709	4	6.28e-21	-1.80072	down	6.55e-95	-8.58822	down	2.83e-45	6.53093	up	--	--	--	K19996|8.8e-100|atr:18449038|K19996 phosphatidylinositol transfer protein SFH5 | (RefSeq) patellin-3	--	[I]	Lipid transport and metabolism	CRAL/TRIO domain	Patellin-6 OS=Arabidopsis thaliana OX=3702 GN=PATL6 PE=2 SV=1	I	Lipid transport and metabolism	PREDICTED: patellin-6-like [Nelumbo nucifera]
Nn2g13279	Nn2g13279	2.8472	64	3.06134	67	2.33964	60	5.67826	121	9.56527	243	4.69955	115	24.8777	592	25.0008	540	16.8503	386	0.000383589	1.34844	up	7.82e-35	3.41992	up	4.55e-08	-1.99257	down	--	--	Cellular Component: plasma membrane (GO:0005886);; Cellular Component: integral component of membrane (GO:0016021);;	--	--	--	--	Domain of unknown function (DUF588)	CASP-like protein 4B4 OS=Oryza sativa subsp. japonica OX=39947 GN=Os05g0344400 PE=3 SV=1	S	Function unknown	PREDICTED: CASP-like protein 4B1 [Nelumbo nucifera]
Nn2g13281	Nn2g13281	0.481488	20	0.461616	19	0.247729	12	1.53139	60	2.46988	115	1.12922	51	4.63216	202	6.00955	237	2.08327	87	3.52e-05	2.06267	up	8.11e-13	3.72479	up	0.00336516	-1.52308	down	--	--	--	K12823|2.2e-16|psom:113271800|K12823 ATP-dependent RNA helicase DDX5/DBP2 [EC:3.6.4.13] | (RefSeq) uncharacterized protein LOC113271800	Spliceosome (ko03040)	--	--	F-box associated domain	Putative F-box protein At1g33530 OS=Arabidopsis thaliana OX=3702 GN=At1g33530 PE=4 SV=1	S	Function unknown	PREDICTED: F-box/kelch-repeat protein At3g23880-like [Nelumbo nucifera]
Nn2g13295	Nn2g13295	18.3423	219	27.8676	322	15.2842	209	82.4785	933	84.5996	1144	42.058	545	171.041	2165	372.958	4287	372.887	4537	3.26e-07	1.82175	up	8.16e-31	4.24964	up	5.07e-09	-2.34089	down	--	--	Biological Process: response to reactive oxygen species (GO:0000302);; Biological Process: response to acid chemical (GO:0001101);; Biological Process: response to molecule of fungal origin (GO:0002238);; Biological Process: response to stress (GO:0006950);; Biological Process: response to oxidative stress (GO:0006979);; Biological Process: multicellular organism development (GO:0007275);; Biolog…	--	--	--	--	Wound-induced protein WI12	Senescence associated gene 20 OS=Arabidopsis thaliana OX=3702 GN=SAG20 PE=2 SV=1	S	Function unknown	PREDICTED: uncharacterized protein LOC104602680 [Nelumbo nucifera]
Nn2g13330	Nn2g13330	0.47753	32	0.380974	25	0.479243	37	11.9426	758	18.0117	1365	8.69903	632	2.20246	157	5.04072	325	4.44035	303	9.91e-49	4.81153	up	6.15e-20	3.48218	up	0.000947111	1.37896	up	[E]	Amino acid transport and metabolism	Cellular Component: integral component of membrane (GO:0016021);; Molecular Function: transmembrane transporter activity (GO:0022857);;	K14638|5.8e-176|han:110883982|K14638 solute carrier family 15 (peptide/histidine transporter), member 3/4 | (RefSeq) protein NRT1/ PTR FAMILY 5.2-like	--	[E]	Amino acid transport and metabolism	POT family	Protein NRT1/ PTR FAMILY 5.1 OS=Arabidopsis thaliana OX=3702 GN=NPF5.1 PE=2 SV=2	E	Amino acid transport and metabolism	PREDICTED: protein NRT1/ PTR FAMILY 5.1-like [Nelumbo nucifera]
Nn2g13335	Nn2g13335	2.74601	195	3.46802	234	2.63937	215	1.25901	85	0.685036	56	1.14224	89	0.172379	14	0.140425	10	0.06553	5	1.57e-05	-1.34675	down	2.85e-22	-3.95964	down	3.5e-06	2.46635	up	--	--	Cellular Component: cellular_component (GO:0005575);; Cellular Component: intracellular (GO:0005622);; Cellular Component: cell (GO:0005623);; Cellular Component: cytoplasm (GO:0005737);; Cellular Component: cytosol (GO:0005829);; Biological Process: organelle organization (GO:0006996);; Biological Process: biological_process (GO:0008150);; Biological Process: plastid organization (GO:0009657);; …	--	--	--	--	Weak chloroplast movement under blue light	WEB family protein At2g38370 OS=Arabidopsis thaliana OX=3702 GN=At2g38370 PE=2 SV=1	S	Function unknown	PREDICTED: WEB family protein At2g38370-like [Nelumbo nucifera]
Nn2g13357	Nn2g13357	4.00155	191	2.79608	129	3.20696	175	1.24327	57	1.42806	78	0.720604	38	0	0	0.079599	4	0.10942	6	9.8e-05	-1.36298	down	2.69e-19	-5.01334	down	4.22e-06	3.28362	up	--	--	--	--	--	--	--	--	--	--	--	PREDICTED: uncharacterized protein LOC104612572 [Nelumbo nucifera]
Nn2g13370	Nn2g13370	7.79279	420	8.57692	400	7.88703	445	30.8424	1390	37.69	2044	27.7706	1396	123.344	6087	102.388	4555	73.8801	3500	1.5e-29	2.00736	up	9.33e-57	3.91914	up	3.36e-11	-1.89183	down	--	--	Cellular Component: chloroplast thylakoid membrane (GO:0009535);; Biological Process: photosynthetic electron transport in photosystem I (GO:0009773);; Cellular Component: integral component of membrane (GO:0016021);; Molecular Function: oxidoreductase activity, acting on iron-sulfur proteins as donors (GO:0016730);;	--	--	--	--	--	--	S	Function unknown	PREDICTED: PGR5-like protein 1A, chloroplastic [Nelumbo nucifera]
Nn2g13393	Nn2g13393	23.051	1211	28.7664	1464	20.6452	1243	1.44686	73	0.876301	53	1.53159	88	0.101752	6	0.129662	7	0.12121	7	1.08e-56	-4.02463	down	8.65e-76	-7.06932	down	1.27e-08	2.88379	up	[R]	General function prediction only	Molecular Function: anaphase-promoting complex binding (GO:0010997);; Molecular Function: ubiquitin-protein transferase activator activity (GO:0097027);; Biological Process: positive regulation of ubiquitin protein ligase activity (GO:1904668);;	K03364|4.1e-278|nnu:104601054|K03364 cell division cycle 20-like protein 1, cofactor of APC complex | (RefSeq) protein FIZZY-RELATED 3	Ubiquitin mediated proteolysis (ko04120)	[DO]	Cell cycle control, cell division, chromosome partitioning;; Posttranslational modification, protein turnover, chaperones	WD domain, G-beta repeat	Protein FIZZY-RELATED 3 OS=Arabidopsis thaliana OX=3702 GN=FZR3 PE=1 SV=1	--	--	PREDICTED: protein FIZZY-RELATED 3 [Nelumbo nucifera]
Nn2g13394	Nn2g13394	7.94531	300	7.67278	281	7.28317	315	0.614468	22	1.04171	45	0.78044	32	2.55379	103	2.6806	98	0.78562	31	7.1e-31	-3.02909	down	0.00234111	-1.44821	down	0.00936303	-1.51369	down	--	--	Molecular Function: transcription factor activity, sequence-specific DNA binding (GO:0003700);; Cellular Component: nucleus (GO:0005634);; Molecular Function: sequence-specific DNA binding (GO:0043565);;	K08956|2.8e-55|gra:105797721|K08956 AFG3 family protein [EC:3.4.24.-] | (RefSeq) ATP-dependent zinc metalloprotease FTSH 10, mitochondrial	--	--	--	WRKY DNA -binding domain	Probable WRKY transcription factor 49 OS=Arabidopsis thaliana OX=3702 GN=WRKY49 PE=1 SV=1	K	Transcription	PREDICTED: probable WRKY transcription factor 49 [Nelumbo nucifera]
Nn2g13398	Nn2g13398	0.361245	4	0.112942	1	0.251646	3	5.32385	43	4.14424	40	3.68571	34	11.4987	102	7.55264	61	22.4602	192	2.57e-08	3.48315	up	3.69e-16	5.63274	up	0.000175943	-1.83755	down	--	--	Molecular Function: kinase activity (GO:0016301);; Biological Process: regulation of DNA endoreduplication (GO:0032875);;	--	--	--	--	--	Cyclin-dependent protein kinase inhibitor SMR4 OS=Arabidopsis thaliana OX=3702 GN=SMR4 PE=1 SV=1	--	--	PREDICTED: cyclin-dependent protein kinase inhibitor SMR2 [Nelumbo nucifera]
Nn2g13485	Nn2g13485	12.5356	891	13.8373	954	12.504	1019	4.17834	283	2.50287	202	5.07407	393	0.688347	53	0.429728	30	0.787618	58	5.31e-09	-1.572	down	2.39e-57	-3.87764	down	2.34e-08	2.21109	up	[M]	Cell wall/membrane/envelope biogenesis	Molecular Function: protein kinase activity (GO:0004672);; Molecular Function: ATP binding (GO:0005524);; Cellular Component: integral component of membrane (GO:0016021);; Molecular Function: polysaccharide binding (GO:0030247);;	K23544|3.4e-73|brp:103842861|K23544 serine incorporator 1/3 | (RefSeq) serine incorporator 3	--	[T]	Signal transduction mechanisms	Protein kinase domain	Wall-associated receptor kinase-like 20 OS=Arabidopsis thaliana OX=3702 GN=WAKL20 PE=2 SV=1	T	Signal transduction mechanisms	PREDICTED: wall-associated receptor kinase-like 20 [Nelumbo nucifera]
Nn2g13565	Nn2g13565	4.5718	212	4.31039	194	3.28742	175	61.0861	2685	64.7497	3402	62.2635	3135	0.121954	7	0.349739	16	0.050146	3	7.03e-159	4.04956	up	9.51e-14	-3.9131	down	1.68e-106	7.83617	up	[G]	Carbohydrate transport and metabolism	Biological Process: carbohydrate metabolic process (GO:0005975);; Molecular Function: fructose 1,6-bisphosphate 1-phosphatase activity (GO:0042132);;	K03841|9.4e-234|nnu:104601169|K03841 fructose-1,6-bisphosphatase I [EC:3.1.3.11] | (RefSeq) fructose-1,6-bisphosphatase, chloroplastic-like	Glycolysis / Gluconeogenesis (ko00010);; Pentose phosphate pathway (ko00030);; Fructose and mannose metabolism (ko00051);; Carbon fixation in photosynthetic organisms (ko00710);; Carbon metabolism (ko01200)	[G]	Carbohydrate transport and metabolism	Fructose-1-6-bisphosphatase, N-terminal domain	Fructose-1,6-bisphosphatase, chloroplastic OS=Pisum sativum OX=3888 GN=FBP PE=1 SV=2	G	Carbohydrate transport and metabolism	PREDICTED: fructose-1,6-bisphosphatase, chloroplastic-like [Nelumbo nucifera]
Nn2g13597	Nn2g13597	14.4521	463	12.7972	397	8.60476	316	2.53894	78	3.96622	145	4.17042	146	0.21124	8	0.417082	13	0.41725	14	2.34e-07	-1.56689	down	7.44e-33	-4.56614	down	2.97e-11	2.88472	up	--	--	Molecular Function: 3-oxo-5-alpha-steroid 4-dehydrogenase activity (GO:0003865);; Cellular Component: integral component of membrane (GO:0016021);; Biological Process: brassinosteroid biosynthetic process (GO:0016132);; Molecular Function: cholestenone 5-alpha-reductase activity (GO:0047751);;	K09591|2.7e-160|nnu:104601194|K09591 steroid 5-alpha-reductase [EC:1.3.1.22] | (RefSeq) steroid 5-alpha-reductase DET2	Brassinosteroid biosynthesis (ko00905)	[I]	Lipid transport and metabolism	3-oxo-5-alpha-steroid 4-dehydrogenase	Steroid 5-alpha-reductase DET2 OS=Arabidopsis thaliana OX=3702 GN=DET2 PE=1 SV=2	I	Lipid transport and metabolism	PREDICTED: steroid 5-alpha-reductase DET2 [Nelumbo nucifera]
Nn2g13606	Nn2g13606	11.9425	1077	11.5906	1014	10.5808	1094	3.58229	305	2.48425	253	4.43189	433	0.388046	31	0.538149	46	0.596487	55	8.15e-12	-1.56273	down	1.49e-74	-4.12168	down	2.96e-12	2.47708	up	--	--	Biological Process: reproduction (GO:0000003);; Biological Process: regionalization (GO:0003002);; Biological Process: developmental process involved in reproduction (GO:0003006);; Cellular Component: cellular_component (GO:0005575);; Cellular Component: cell (GO:0005623);; Cellular Component: plasma membrane (GO:0005886);; Biological Process: transport (GO:0006810);; Biological Process: multicel…	--	--	--	--	Protein of unknown function (DUF740)	Protein OCTOPUS OS=Arabidopsis thaliana OX=3702 GN=OPS PE=1 SV=1	S	Function unknown	PREDICTED: UPF0503 protein At3g09070, chloroplastic-like [Nelumbo nucifera]
Nn2g13694	Nn2g13694	29.6446	1876	38.808	2200	25.6343	1607	214.638	11491	185.257	11900	122.821	7643	461.358	27344	603.851	32931	386.479	21576	3.54e-21	2.49064	up	3.21e-54	4.26316	up	1.37e-08	-1.72576	down	[QV]	Secondary metabolites biosynthesis, transport and catabolism;; Defense mechanisms	Molecular Function: monooxygenase activity (GO:0004497);; Molecular Function: iron ion binding (GO:0005506);; Cellular Component: integral component of membrane (GO:0016021);; Molecular Function: oxidoreductase activity, acting on paired donors, with incorporation or reduction of molecular oxygen (GO:0016705);; Molecular Function: heme binding (GO:0020037);;	K09588|7.5e-178|nnu:104601254|K09588 cytochrome P450 family 90 subfamily A polypeptide 1 [EC:1.14.-.-] | (RefSeq) cytochrome P450 90A1	Brassinosteroid biosynthesis (ko00905)	[QI]	Secondary metabolites biosynthesis, transport and catabolism;; Lipid transport and metabolism	Cytochrome P450	Cytochrome P450 90A1 OS=Arabidopsis thaliana OX=3702 GN=CYP90A1 PE=1 SV=1	Q	Secondary metabolites biosynthesis, transport and catabolism	PREDICTED: cytochrome P450 90A1 [Nelumbo nucifera]
Nn2g13702	Nn2g13702	9.33179	1061	9.10322	1005	8.79696	1148	4.00507	434	4.17267	540	3.97627	493	1.4123	171	1.37552	152	1.20255	140	6.56e-21	-1.03094	down	1.34e-53	-2.33362	down	1.95e-12	1.28497	up	--	--	Biological Process: ribosomal large subunit export from nucleus (GO:0000055);; Biological Process: ribosomal small subunit export from nucleus (GO:0000056);; Molecular Function: structural constituent of nuclear pore (GO:0017056);;	K14318|0.0e+00|nnu:104601261|K14318 nuclear pore complex protein Nup88 | (RefSeq) nuclear pore complex protein NUP88	RNA transport (ko03013)	[YU]	Nuclear structure;; Intracellular trafficking, secretion, and vesicular transport	Nuclear pore component	Nuclear pore complex protein NUP88 OS=Arabidopsis thaliana OX=3702 GN=NUP88 PE=1 SV=1	--	--	PREDICTED: nuclear pore complex protein NUP88 isoform X1 [Nelumbo nucifera]
Nn2g13724	Nn2g13724	931.445	56295	798.271	45143	798.848	48862	201.641	11256	280.545	17829	245.64	14156	12.6192	634	21.6935	1136	32.7374	1789	5.82e-25	-1.69922	down	4.31e-43	-4.89774	down	4.25e-17	3.13224	up	[E]	Amino acid transport and metabolism	Cellular Component: cytoplasm (GO:0005737);; Biological Process: L-phenylalanine catabolic process (GO:0006559);; Biological Process: cinnamic acid biosynthetic process (GO:0009800);; Molecular Function: phenylalanine ammonia-lyase activity (GO:0045548);;	K10775|0.0e+00|nnu:104601277|K10775 phenylalanine ammonia-lyase [EC:4.3.1.24] | (RefSeq) phenylalanine ammonia-lyase	Phenylalanine metabolism (ko00360);; Phenylpropanoid biosynthesis (ko00940)	[Q]	Secondary metabolites biosynthesis, transport and catabolism	Aromatic amino acid lyase	Phenylalanine ammonia-lyase OS=Citrus limon OX=2708 GN=PAL6 PE=2 SV=1	Q	Secondary metabolites biosynthesis, transport and catabolism	PREDICTED: phenylalanine ammonia-lyase [Nelumbo nucifera]
Nn2g13743	Nn2g13743	255.955	4573	244.16	4076	239.813	4564	43.0799	1061	58.8359	1731	84.1715	1559	12.9851	358	24.3082	398	17.5794	466	4.22e-22	-1.50822	down	1.89e-103	-2.97704	down	6.37e-12	1.43977	up	[J]	Translation, ribosomal structure and biogenesis	Molecular Function: N-acetyltransferase activity (GO:0008080);;	K22883|2.3e-125|nnu:104601287|K22883 L-ornithine N5-acetyltransferase [EC:2.3.1.-] | (RefSeq) probable acetyltransferase NATA1-like	--	[E]	Amino acid transport and metabolism	Acetyltransferase (GNAT) family	Probable acetyltransferase NATA1-like OS=Arabidopsis thaliana OX=3702 GN=At2g39020 PE=2 SV=1	E	Amino acid transport and metabolism	PREDICTED: probable acetyltransferase NATA1-like [Nelumbo nucifera]
Nn2g13766	Nn2g13766	4.82897	151	6.01042	176	5.65511	198	9.99278	297	10.3278	349	11.0088	373	0.432471	16	0.726149	22	1.01546	33	9.28e-09	1.04404	up	1.19e-12	-2.41015	down	5.38e-30	3.40746	up	--	--	--	--	--	--	--	--	--	--	--	PREDICTED: uncharacterized protein LOC104586339 isoform X1 [Nelumbo nucifera]
Nn2g13768	Nn2g13768	25.3747	156	24.0911	143	22.9412	161	7.83113	46	8.15382	57	7.68418	52	0	0	0	0	0	0	1.8e-09	-1.44888	down	8.43e-12	-8.15532	down	2.18e-10	5.68588	up	--	--	--	--	--	--	--	DVL family	--	S	Function unknown	hypothetical protein CK203_057277 [Vitis vinifera]
Nn2g13772	Nn2g13772	8.43796	618	10.1473	645	8.88774	720	3.07403	210	2.94176	250	5.18256	355	0.244712	14	0.800381	41	0.295462	25	2.2e-08	-1.17879	down	1.55e-29	-4.11467	down	1.12e-10	2.83572	up	[V]	Defense mechanisms	Molecular Function: ATP binding (GO:0005524);; Cellular Component: integral component of membrane (GO:0016021);; Molecular Function: ATPase activity (GO:0016887);;	K05681|8.2e-39|vcn:VOLCADRAFT_73319|K05681 ATP-binding cassette, subfamily G (WHITE), member 2 | (RefSeq) hypothetical protein	ABC transporters (ko02010)	[Q]	Secondary metabolites biosynthesis, transport and catabolism	ABC-2 type transporter	ABC transporter G family member 3 OS=Arabidopsis thaliana OX=3702 GN=ABCG3 PE=1 SV=2	Q	Secondary metabolites biosynthesis, transport and catabolism	PREDICTED: ABC transporter G family member 3-like [Nelumbo nucifera]
Nn2g13807	Nn2g13807	4.05885	175	2.50401	103	6.31332	314	12.6767	515	16.1878	780	11.8237	552	0	0	0	0	0.030026	2	9.12e-07	1.71541	up	9.21e-15	-6.98226	down	1.79e-36	8.10236	up	--	--	Molecular Function: DNA binding (GO:0003677);; Cellular Component: nucleus (GO:0005634);;	K09422|6.0e-166|nnu:104586314|K09422 transcription factor MYB, plant | (RefSeq) transcription factor RAX2-like	--	[K]	Transcription	Myb-like DNA-binding domain	Transcription factor MYB36 OS=Arabidopsis thaliana OX=3702 GN=MYB36 PE=1 SV=1	--	--	PREDICTED: transcription factor RAX2-like [Nelumbo nucifera]
Nn2g13845	Nn2g13845	0.599843	58	0.995055	92	0.812442	85	4.49487	405	3.06113	319	2.85772	293	7.00922	709	6.6658	614	13.6978	1279	4.43e-12	2.16321	up	1.74e-28	3.85709	up	4.37e-06	-1.64177	down	[G]	Carbohydrate transport and metabolism	Molecular Function: pectate lyase activity (GO:0030570);; Biological Process: pectin catabolic process (GO:0045490);; Molecular Function: metal ion binding (GO:0046872);;	K01728|3.0e-274|nnu:104587349|K01728 pectate lyase [EC:4.2.2.2] | (RefSeq) probable pectate lyase 18	Pentose and glucuronate interconversions (ko00040)	--	--	Pectate lyase	Probable pectate lyase 12 OS=Arabidopsis thaliana OX=3702 GN=At3g53190 PE=2 SV=2	G	Carbohydrate transport and metabolism	PREDICTED: probable pectate lyase 18 [Nelumbo nucifera]
Nn2g13850	Nn2g13850	8.88038	619	9.10201	636	8.08521	664	1.20863	81	0.559035	47	1.86718	149	0.238174	19	0.271082	20	0.447174	31	8.49e-12	-2.5863	down	1.52e-65	-4.30285	down	0.00646232	1.52236	up	--	--	Cellular Component: plasma membrane (GO:0005886);; Molecular Function: kinase activity (GO:0016301);; Molecular Function: kinase inhibitor activity (GO:0019210);;	--	--	--	--	--	Probable membrane-associated kinase regulator 1 OS=Arabidopsis thaliana OX=3702 GN=MAKR1 PE=1 SV=1	S	Function unknown	PREDICTED: probable membrane-associated kinase regulator 1 [Nelumbo nucifera]
Nn2g13851	Nn2g13851	43.1569	1225	41.1158	1111	43.2923	1389	8.07612	215	4.93602	158	11.5863	354	1.10485	32	1.27452	35	1.35683	39	2.48e-14	-2.20041	down	1.22e-135	-4.66115	down	6.08e-09	2.33027	up	[I]	Lipid transport and metabolism	Molecular Function: methyltransferase activity (GO:0008168);; Biological Process: methylation (GO:0032259);;	K21483|3.3e-96|nnu:104612427|K21483 salicylate 1-O-methyltransferase [EC:2.1.1.274] | (RefSeq) salicylate carboxymethyltransferase-like	--	--	--	SAM dependent carboxyl methyltransferase	Salicylate carboxymethyltransferase OS=Clarkia breweri OX=36903 GN=SAMT PE=1 SV=1	S	Function unknown	PREDICTED: salicylate carboxymethyltransferase-like [Nelumbo nucifera]
Nn2g13856	Nn2g13856	3.63782	122	3.43237	112	4.16941	160	11.2711	358	12.7986	485	6.20579	226	38.2225	1357	54.0035	1741	24.4114	833	3.89e-06	1.50803	up	6.82e-30	3.76029	up	9.29e-08	-2.17407	down	--	--	Molecular Function: molecular_function (GO:0003674);; Molecular Function: nucleic acid binding (GO:0003676);; Molecular Function: DNA binding (GO:0003677);; Molecular Function: transcription factor activity, sequence-specific DNA binding (GO:0003700);; Molecular Function: binding (GO:0005488);; Cellular Component: cellular_component (GO:0005575);; Cellular Component: intracellular (GO:0005622);; …	K14841|1.7e-06|obr:102706672|K14841 ribosome biogenesis protein NSA1 | (RefSeq) WD repeat-containing protein DDB_G0290555	--	[R]	General function prediction only	C2H2-type zinc finger	Zinc finger protein ZAT5 OS=Arabidopsis thaliana OX=3702 GN=ZAT5 PE=2 SV=1	S	Function unknown	PREDICTED: zinc finger protein ZAT5 [Nelumbo nucifera]
Nn2g13887	Nn2g13887	7.97032	755	8.49347	780	7.48427	826	14.4985	1294	15.7397	1714	15.6406	1614	1.16829	117	1.81275	156	2.13067	200	2.99e-18	1.05526	up	7.36e-16	-1.86176	down	8.02e-36	2.88472	up	[QV]	Secondary metabolites biosynthesis, transport and catabolism;; Defense mechanisms	Molecular Function: monooxygenase activity (GO:0004497);; Molecular Function: iron ion binding (GO:0005506);; Molecular Function: oxidoreductase activity, acting on paired donors, with incorporation or reduction of molecular oxygen (GO:0016705);; Molecular Function: heme binding (GO:0020037);;	K09837|0.0e+00|nnu:104586192|K09837 carotenoid epsilon hydroxylase [EC:1.14.14.158] | (RefSeq) carotene epsilon-monooxygenase, chloroplastic	Carotenoid biosynthesis (ko00906)	[QI]	Secondary metabolites biosynthesis, transport and catabolism;; Lipid transport and metabolism	Cytochrome P450	Carotene epsilon-monooxygenase, chloroplastic OS=Arabidopsis thaliana OX=3702 GN=CYP97C1 PE=1 SV=1	Q	Secondary metabolites biosynthesis, transport and catabolism	PREDICTED: carotene epsilon-monooxygenase, chloroplastic isoform X1 [Nelumbo nucifera]
Nn2g13892	Nn2g13892	19.6909	573	40.2043	1114	31.528	1036	290.706	7847	217.602	7112	538.781	16689	0.823764	27	1.02723	30	3.92589	119	6.54e-22	3.47951	up	2.94e-09	-3.42374	down	1.36e-32	6.60321	up	[C]	Energy production and conversion	Molecular Function: oxygen transporter activity (GO:0005344);; Molecular Function: oxygen binding (GO:0019825);; Molecular Function: heme binding (GO:0020037);; Molecular Function: metal ion binding (GO:0046872);;	K11968|3.1e-47|dzi:111298175|K11968 ariadne-1 [EC:2.3.2.31] | (RefSeq) probable E3 ubiquitin-protein ligase ARI2 isoform X1	--	[C]	Energy production and conversion	Globin	Non-symbiotic hemoglobin 2 OS=Gossypium hirsutum OX=3635 GN=HB2 PE=3 SV=1	C	Energy production and conversion	PREDICTED: non-symbiotic hemoglobin 2-like [Nelumbo nucifera]
Nn2g13896	Nn2g13896	2.72393	70	1.63446	46	2.59099	83	6.99299	188	6.91308	227	4.00101	129	37.3178	1119	41.2418	999	14.6285	368	7.45e-06	1.52385	up	6.33e-19	4.05105	up	2.03e-07	-2.44113	down	--	--	--	--	--	--	--	--	--	S	Function unknown	PREDICTED: uncharacterized protein LOC104586185 [Nelumbo nucifera]
Nn2g13942	Nn2g13942	12.9655	162	10.7959	131	8.34723	120	5.14424	61	3.22488	46	4.11499	56	0.584837	8	0.570827	7	0.351296	5	0.000231348	-1.20372	down	1.29e-17	-3.84478	down	1.25e-06	2.51201	up	--	--	Molecular Function: protein kinase activity (GO:0004672);; Molecular Function: ATP binding (GO:0005524);; Cellular Component: integral component of membrane (GO:0016021);;	--	--	--	--	--	--	T	Signal transduction mechanisms	PREDICTED: probable inactive receptor kinase At1g48480 [Nelumbo nucifera]
Nn2g13962	Nn2g13962	10.0444	738	11.387	811	9.96454	839	2.60559	182	1.30546	109	3.41735	273	0.046446	4	0	0	0.083624	7	7.8e-09	-1.9201	down	1.45e-54	-7.1617	down	1.46e-13	4.77453	up	[J]	Translation, ribosomal structure and biogenesis	Molecular Function: protein kinase activity (GO:0004672);; Molecular Function: ATP binding (GO:0005524);; Cellular Component: integral component of membrane (GO:0016021);;	K13415|1.1e-47|bvg:104895495|K13415 protein brassinosteroid insensitive 1 [EC:2.7.10.1 2.7.11.1] | (RefSeq) systemin receptor SR160	Plant hormone signal transduction (ko04075)	--	--	Protein kinase domain	Leucine-rich repeat receptor-like protein kinase PXC1 OS=Arabidopsis thaliana OX=3702 GN=PXC1 PE=1 SV=1	T	Signal transduction mechanisms	PREDICTED: leucine-rich repeat receptor-like protein kinase PXC1 [Nelumbo nucifera]
Nn2g13985	Nn2g13985	8.55236	185	12.0031	250	7.59738	200	3.42058	73	3.82815	99	2.67721	68	0.379082	13	0.655296	16	0.887322	21	1.78e-05	-1.28985	down	1.67e-18	-3.18954	down	5.55e-06	1.83143	up	--	--	Cellular Component: nuclear chromatin (GO:0000790);; Biological Process: DNA replication-dependent nucleosome assembly (GO:0006335);; Biological Process: DNA replication-independent nucleosome assembly (GO:0006336);; Molecular Function: histone binding (GO:0042393);;	K10753|3.1e-35|vvi:100266239|K10753 histone chaperone ASF1 | (RefSeq) histone chaperone ASF1B	--	[KB]	Transcription;; Chromatin structure and dynamics	ASF1 like histone chaperone	Histone chaperone ASF1B OS=Arabidopsis thaliana OX=3702 GN=ASF1B PE=1 SV=1	--	--	Histone chaperone [Nymphaea thermarum]
Nn2g13991	Nn2g13991	46.6285	1563	42.5907	1390	83.0514	3268	251.14	8168	284.497	10703	225.738	8515	687.508	24352	570.029	18273	439.388	16159	6.38e-16	2.22201	up	1.33e-29	3.69586	up	1.13e-10	-1.45645	down	--	--	--	--	--	[R]	General function prediction only	--	--	S	Function unknown	PREDICTED: uncharacterized protein At4g22758 [Nelumbo nucifera]
Nn2g14004	Nn2g14004	28.1701	301	27.1287	281	22.69	278	52.5452	533	60.2084	730	43.8521	510	102.547	1165	127.728	1318	202.321	2209	3e-08	1.12226	up	1.37e-25	2.86653	up	9.5e-09	-1.72928	down	--	--	Cellular Component: extracellular region (GO:0005576);; Molecular Function: growth factor activity (GO:0008083);; Biological Process: cell proliferation (GO:0008283);;	--	--	--	--	Phytosulfokine precursor protein (PSK)	Putative phytosulfokines 6 OS=Arabidopsis thaliana OX=3702 GN=PSK6 PE=2 SV=2	S	Function unknown	PREDICTED: putative phytosulfokines 6 [Nelumbo nucifera]
Nn2g14008	Nn2g14008	42.7196	1979	41.6231	1913	36.9419	1964	16.15	712	19.0623	1003	16.4788	831	3.02636	149	2.14827	96	1.76093	84	2.24e-15	-1.10752	down	6.13e-48	-3.67944	down	9.4e-20	2.5335	up	[E]	Amino acid transport and metabolism	Molecular Function: prephenate dehydratase activity (GO:0004664);; Biological Process: L-phenylalanine biosynthetic process (GO:0009094);; Cellular Component: chloroplast stroma (GO:0009570);; Molecular Function: arogenate dehydratase activity (GO:0047769);;	K05359|4.1e-216|nnu:104612491|K05359 arogenate/prephenate dehydratase [EC:4.2.1.91 4.2.1.51] | (RefSeq) arogenate dehydratase/prephenate dehydratase 6, chloroplastic-like	Phenylalanine, tyrosine and tryptophan biosynthesis (ko00400);; Biosynthesis of amino acids (ko01230)	[E]	Amino acid transport and metabolism	Prephenate dehydratase	Arogenate dehydratase 3, chloroplastic OS=Arabidopsis thaliana OX=3702 GN=ADT3 PE=1 SV=1	E	Amino acid transport and metabolism	PREDICTED: arogenate dehydratase/prephenate dehydratase 6, chloroplastic-like [Nelumbo nucifera]
Nn2g14009	Nn2g14009	13.3537	1031	15.2555	1142	12.2847	1088	2.67106	196	2.35123	207	3.18685	268	0.303617	25	0.375638	28	0.604362	48	1.02e-32	-2.17105	down	4.76e-63	-4.54032	down	6.87e-12	2.31229	up	[F]	Nucleotide transport and metabolism	Cellular Component: integral component of membrane (GO:0016021);; Molecular Function: transmembrane transporter activity (GO:0022857);;	K14611|1.4e-194|nnu:104611975|K14611 solute carrier family 23 (nucleobase transporter), member 1 | (RefSeq) nucleobase-ascorbate transporter 11-like	--	[F]	Nucleotide transport and metabolism	Permease family	Nucleobase-ascorbate transporter 12 OS=Arabidopsis thaliana OX=3702 GN=NAT12 PE=1 SV=3	F	Nucleotide transport and metabolism	PREDICTED: nucleobase-ascorbate transporter 12-like [Nelumbo nucifera]
Nn2g14017	Nn2g14017	49.0518	3564	50.0659	3535	45.06	3774	13.7291	959	14.2795	1159	16.9995	1351	1.92199	151	3.88184	273	1.70724	131	2.76e-33	-1.55051	down	2.02e-31	-3.78522	down	3.63e-10	2.19698	up	--	--	--	K01051|1.1e-12|var:108341535|K01051 pectinesterase [EC:3.1.1.11] | (RefSeq) probable pectinesterase/pectinesterase inhibitor 58	Pentose and glucuronate interconversions (ko00040)	[K]	Transcription	Myb/SANT-like DNA-binding domain	Trihelix transcription factor PTL OS=Arabidopsis thaliana OX=3702 GN=PTL PE=1 SV=1	K	Transcription	PREDICTED: trihelix transcription factor PTL-like [Nelumbo nucifera]
Nn2g14034	Nn2g14034	25.0494	1634	29.7249	1896	19.513	1451	89.2095	5587	69.2523	5214	96.143	6928	0.196468	15	0.154408	11	2.19677	145	5.77e-19	1.89121	up	5.7e-05	-4.02836	down	8.89e-08	4.85704	up	[QV]	Secondary metabolites biosynthesis, transport and catabolism;; Defense mechanisms	Molecular Function: monooxygenase activity (GO:0004497);; Molecular Function: iron ion binding (GO:0005506);; Cellular Component: integral component of membrane (GO:0016021);; Molecular Function: oxidoreductase activity, acting on paired donors, with incorporation or reduction of molecular oxygen (GO:0016705);; Molecular Function: heme binding (GO:0020037);;	K21995|4.0e-298|nnu:104612469|K21995 cytochrome P450 family 77 subfamily A [EC:1.14.-.-] | (RefSeq) cytochrome P450 77A2-like	Cutin, suberine and wax biosynthesis (ko00073)	[Q]	Secondary metabolites biosynthesis, transport and catabolism	Cytochrome P450	Cytochrome P450 77A2 OS=Solanum melongena OX=4111 GN=CYP77A2 PE=2 SV=1	Q	Secondary metabolites biosynthesis, transport and catabolism	PREDICTED: cytochrome P450 77A2-like [Nelumbo nucifera]
Nn2g14044	Nn2g14044	8.50664	444	8.33869	422	10.3185	618	18.2014	902	13.2565	786	21.738	1234	1.98532	111	1.71585	87	2.11792	113	2.09e-06	1.07542	up	7.1e-19	-1.78484	down	1.23e-27	2.82959	up	--	--	Cellular Component: integral component of membrane (GO:0016021);;	K01193|1.3e-13|ats:109747879|K01193 beta-fructofuranosidase [EC:3.2.1.26] | (RefSeq) LOC109747879; beta-fructofuranosidase, insoluble isoenzyme 3-like	Galactose metabolism (ko00052);; Starch and sucrose metabolism (ko00500)	--	--	Plant protein of unknown function	UPF0481 protein At3g47200 OS=Arabidopsis thaliana OX=3702 GN=At3g47200 PE=2 SV=1	S	Function unknown	PREDICTED: UPF0481 protein At3g47200-like [Nelumbo nucifera]
Nn2g14050	Nn2g14050	18.5079	786	16.7204	686	16.9561	820	4.13995	164	4.47855	218	5.34922	246	0	0	0.047788	3	0	0	4.4e-30	-1.76214	down	5.41e-35	-8.61384	down	1.71e-23	6.40404	up	--	--	Molecular Function: ATP binding (GO:0005524);; Cellular Component: nucleus (GO:0005634);; Biological Process: transcription, DNA-templated (GO:0006351);; Biological Process: regulation of transcription, DNA-templated (GO:0006355);; Biological Process: developmental process (GO:0032502);;	K22382|2.3e-08|oeu:111408549|K22382 WD repeat-containing protein 26 | (RefSeq) WD repeat-containing protein 26 homolog	--	--	--	WRC	Growth-regulating factor 3 OS=Arabidopsis thaliana OX=3702 GN=GRF3 PE=1 SV=1	K	Transcription	PREDICTED: growth-regulating factor 3-like [Nelumbo nucifera]
Nn2g14052	Nn2g14052	1.64233	119	1.56679	110	1.71786	143	0.615529	43	0.739162	61	0.762081	60	0.105965	9	0.25373	18	0.144739	11	4.92e-05	-1.06421	down	3.11e-13	-2.78652	down	0.000537684	1.64581	up	--	--	--	K22651|1.4e-71|mdm:103443441|K22651 E3 ubiquitin-protein ligase RNF4 [EC:2.3.2.27] | (RefSeq) LOW QUALITY PROTEIN: pentatricopeptide repeat-containing protein At1g50270-like	--	[R]	General function prediction only	PPR repeat	Pentatricopeptide repeat-containing protein At5g66520 OS=Arabidopsis thaliana OX=3702 GN=PCMP-H61 PE=2 SV=1	S	Function unknown	PREDICTED: pentatricopeptide repeat-containing protein At3g29230-like [Nelumbo nucifera]
Nn2g14089	Nn2g14089	4.7956	263	2.73378	146	5.5736	350	7.79457	405	21.4534	1331	5.58962	333	1134.98	65908	349.084	18389	116.54	6507	0.00477985	1.43922	up	8.52e-16	6.85758	up	2.65e-07	-4.57493	down	[Q]	Secondary metabolites biosynthesis, transport and catabolism	Biological Process: lipid metabolic process (GO:0006629);; Molecular Function: fatty-acyl-CoA reductase (alcohol-forming) activity (GO:0080019);;	K13356|2.8e-285|nnu:104607725|K13356 alcohol-forming fatty acyl-CoA reductase [EC:1.2.1.84] | (RefSeq) alcohol-forming fatty acyl-CoA reductase-like	Cutin, suberine and wax biosynthesis (ko00073);; Peroxisome (ko04146)	[I]	Lipid transport and metabolism	Male sterility protein	Alcohol-forming fatty acyl-CoA reductase OS=Simmondsia chinensis OX=3999 PE=1 SV=1	I	Lipid transport and metabolism	PREDICTED: alcohol-forming fatty acyl-CoA reductase-like isoform X1 [Nelumbo nucifera]
Nn2g14090	Nn2g14090	0.896858	49	1.10912	60	0.983971	63	0.34272	12	0.905445	31	0.351797	17	28.0187	993	8.23529	189	2.24501	51	0.00385753	-1.35818	down	0.000236967	3.07737	up	6.31e-07	-3.98343	down	[Q]	Secondary metabolites biosynthesis, transport and catabolism	Biological Process: lipid metabolic process (GO:0006629);; Molecular Function: fatty-acyl-CoA reductase (alcohol-forming) activity (GO:0080019);;	K13356|1.2e-283|nnu:104607724|K13356 alcohol-forming fatty acyl-CoA reductase [EC:1.2.1.84] | (RefSeq) alcohol-forming fatty acyl-CoA reductase-like	Cutin, suberine and wax biosynthesis (ko00073);; Peroxisome (ko04146)	[I]	Lipid transport and metabolism	Male sterility protein	Alcohol-forming fatty acyl-CoA reductase OS=Simmondsia chinensis OX=3999 PE=1 SV=1	I	Lipid transport and metabolism	PREDICTED: alcohol-forming fatty acyl-CoA reductase-like [Nelumbo nucifera]
Nn2g14100	Nn2g14100	0.045912	3	0.300537	17	0.184146	13	4.78013	262	2.16081	142	3.18028	199	8.50822	521	10.6667	593	9.65983	568	7.03e-14	3.93876	up	1.34e-51	6.02794	up	8.07e-08	-1.77535	down	--	--	Molecular Function: hydrolase activity, acting on ester bonds (GO:0016788);;	K16280|2.6e-39|csat:104750588|K16280 E3 ubiquitin-protein ligase RGLG [EC:2.3.2.27] | (RefSeq) E3 ubiquitin-protein ligase RGLG2-like isoform X1	--	--	--	GDSL-like Lipase/Acylhydrolase	GDSL esterase/lipase At5g03610 OS=Arabidopsis thaliana OX=3702 GN=At5g03610 PE=2 SV=1	S	Function unknown	PREDICTED: GDSL esterase/lipase At5g03610-like [Nelumbo nucifera]
Nn2g14108	Nn2g14108	7.71619	1356	7.399	1243	6.90303	1366	1.75806	288	1.16179	228	1.95451	360	0.051603	11	0.028761	6	0.047074	9	4.04e-23	-2.04973	down	1.83e-101	-6.73549	down	1.8e-28	4.53182	up	[KL]	Transcription;; Replication, recombination and repair	Molecular Function: ATP binding (GO:0005524);;	K10875|0.0e+00|nnu:104607713|K10875 DNA repair and recombination protein RAD54 and RAD54-like protein [EC:3.6.4.-] | (RefSeq) SNF2 domain-containing protein CLASSY 1-like	Homologous recombination (ko03440)	[L]	Replication, recombination and repair	SNF2 family N-terminal domain	SNF2 domain-containing protein CLASSY 2 OS=Arabidopsis thaliana OX=3702 GN=CLSY2 PE=1 SV=1	L	Replication, recombination and repair	PREDICTED: SNF2 domain-containing protein CLASSY 1-like [Nelumbo nucifera]
Nn2g14122	Nn2g14122	3.09656	209	2.58674	170	2.13403	165	0.972721	63	0.912801	70	1.03664	77	0.228909	17	0.172484	12	0.280894	20	1.04e-06	-1.25837	down	2.22e-18	-2.9958	down	1.49e-05	1.68205	up	--	--	Molecular Function: molecular_function (GO:0003674);; Molecular Function: nucleic acid binding (GO:0003676);; Molecular Function: RNA binding (GO:0003723);; Molecular Function: catalytic activity (GO:0003824);; Molecular Function: nuclease activity (GO:0004518);; Molecular Function: endonuclease activity (GO:0004519);; Molecular Function: binding (GO:0005488);; Cellular Component: cellular_compon…	K22651|9.5e-118|mdm:103443441|K22651 E3 ubiquitin-protein ligase RNF4 [EC:2.3.2.27] | (RefSeq) LOW QUALITY PROTEIN: pentatricopeptide repeat-containing protein At1g50270-like	--	[R]	General function prediction only	PPR repeat	Pentatricopeptide repeat-containing protein At4g38010 OS=Arabidopsis thaliana OX=3702 GN=PCMP-E45 PE=3 SV=1	S	Function unknown	PREDICTED: pentatricopeptide repeat-containing protein At4g38010 [Nelumbo nucifera]
Nn2g14128	Nn2g14128	16.2928	669	19.9943	761	18.9546	851	80.9654	3124	59.4085	2743	112.185	4990	2.11836	91	1.73243	66	0.921772	39	1.48e-21	2.30817	up	4.4e-20	-3.04746	down	3.7e-44	5.24032	up	[K]	Transcription	Molecular Function: O-methyltransferase activity (GO:0008171);; Biological Process: methylation (GO:0032259);; Molecular Function: protein dimerization activity (GO:0046983);;	K13383|6.3e-159|nnu:104587969|K13383 (RS)-norcoclaurine 6-O-methyltransferase [EC:2.1.1.128] | (RefSeq) (RS)-norcoclaurine 6-O-methyltransferase-like	Isoquinoline alkaloid biosynthesis (ko00950)	[R]	General function prediction only	O-methyltransferase domain	(RS)-norcoclaurine 6-O-methyltransferase OS=Thalictrum flavum subsp. glaucum OX=150095 PE=1 SV=1	J	Translation, ribosomal structure and biogenesis	PREDICTED: (RS)-norcoclaurine 6-O-methyltransferase-like [Nelumbo nucifera]
Nn2g14153	Nn2g14153	14.1666	770	14.7753	778	13.8505	862	3.72353	193	5.78594	357	4.44972	263	0.204915	13	0.05967	4	0.182759	11	2.02e-12	-1.46703	down	5.67e-75	-5.91694	down	7.48e-24	4.29206	up	[D]	Cell cycle control, cell division, chromosome partitioning	Molecular Function: GTPase activity (GO:0003924);; Molecular Function: GTP binding (GO:0005525);; Biological Process: cell division (GO:0051301);;	K03531|2.4e-273|nnu:104607676|K03531 cell division protein FtsZ | (RefSeq) cell division protein FtsZ homolog 2-1, chloroplastic-like	--	--	--	Tubulin/FtsZ family, GTPase domain	Cell division protein FtsZ homolog 2-1, chloroplastic OS=Arabidopsis thaliana OX=3702 GN=FTSZ2-1 PE=1 SV=2	D	Cell cycle control, cell division, chromosome partitioning	PREDICTED: cell division protein FtsZ homolog 2-1, chloroplastic-like [Nelumbo nucifera]
Nn2g14154	Nn2g14154	5.0566	101	7.94928	153	3.9948	91	35.3559	665	57.4506	1292	22.6728	489	220.242	4637	85.4654	1634	42.8432	868	5.68e-12	2.75252	up	1.88e-15	4.64653	up	0.00398463	-1.77229	down	--	--	Biological Process: blue light signaling pathway (GO:0009785);;	K01166|8.6e-19|dzi:111302682|K01166 ribonuclease T2 [EC:4.6.1.19] | (RefSeq) uncharacterized protein LOC111302682	--	--	--	--	Protein BIC1 OS=Arabidopsis thaliana OX=3702 GN=BIC1 PE=1 SV=1	--	--	PREDICTED: uncharacterized protein LOC104607675 [Nelumbo nucifera]
Nn2g14197	Nn2g14197	26.9463	1569	31.2446	1760	17.6765	1196	4.07201	227	0.484829	31	4.18108	257	0.021953	2	0.236968	15	0.597016	33	0.000993821	-2.48927	down	1.8e-20	-5.8496	down	0.00403236	2.4958	up	--	--	--	--	--	--	--	--	--	--	--	PREDICTED: uncharacterized protein LOC104607647 [Nelumbo nucifera]
Nn2g14215	Nn2g14215	94.4847	2176	113.717	2539	75.6006	1996	32.6461	714	27.3411	715	46.3123	1161	0.214905	6	0	0	0.0631	2	6.42e-07	-1.27379	down	2.07e-64	-9.00638	down	2.29e-45	7.38223	up	--	--	--	--	--	--	--	Pollen protein Ole e 1 like	--	S	Function unknown	PREDICTED: uncharacterized protein LOC104607635 [Nelumbo nucifera]
Nn2g14225	Nn2g14225	7.60946	438	6.07241	331	7.0049	458	17.8789	971	19.6061	1298	14.3217	839	32.0801	2123	58.2166	3385	34.3602	2172	4.67e-12	1.43047	up	2.58e-31	3.09987	up	6.72e-08	-1.64843	down	[HC]	Coenzyme transport and metabolism;; Energy production and conversion	Biological Process: carotenoid biosynthetic process (GO:0016117);; Molecular Function: oxidoreductase activity, acting on paired donors, with incorporation or reduction of molecular oxygen (GO:0016705);;	K14593|2.5e-284|nnu:104607627|K14593 capsanthin/capsorubin synthase [EC:5.3.99.8] | (RefSeq) capsanthin/capsorubin synthase, chromoplastic-like	Carotenoid biosynthesis (ko00906)	--	--	Lycopene cyclase protein	Capsanthin/capsorubin synthase, chromoplastic OS=Citrus sinensis OX=2711 GN=CCS PE=3 SV=1	S	Function unknown	PREDICTED: capsanthin/capsorubin synthase, chromoplastic-like [Nelumbo nucifera]
Nn2g14246	Nn2g14246	1.24609	64	1.15675	56	0.850581	48	7.279	305	4.31981	234	6.0946	320	12.6546	631	9.52052	418	9.49581	457	7.62e-17	2.39799	up	6.48e-39	3.58386	up	6.75e-05	-1.14197	down	[IQR]	Lipid transport and metabolism;; Secondary metabolites biosynthesis, transport and catabolism;; General function prediction only	--	K09841|1.2e-77|egu:105052461|K09841 xanthoxin dehydrogenase [EC:1.1.1.288] | (RefSeq) LOW QUALITY PROTEIN: zerumbone synthase-like	Carotenoid biosynthesis (ko00906)	[R]	General function prediction only	Enoyl-(Acyl carrier protein) reductase	Secoisolariciresinol dehydrogenase (Fragment) OS=Podophyllum peltatum OX=35933 PE=1 SV=1	Q	Secondary metabolites biosynthesis, transport and catabolism	PREDICTED: secoisolariciresinol dehydrogenase-like [Nelumbo nucifera]
Nn2g14267	Nn2g14267	2.79649	168	3.16859	182	3.80558	261	7.75609	440	7.82491	530	8.83877	574	1.2637	81	0.645721	37	0.749363	46	4.76e-14	1.42804	up	0.000143682	-1.41671	down	5.79e-18	2.80079	up	--	--	Molecular Function: aspartic-type endopeptidase activity (GO:0004190);;	K22683|4.4e-21|han:110891469|K22683 aspartyl protease family protein [EC:3.4.23.-] | (RefSeq) aspartyl protease family protein 2-like	--	[O]	Posttranslational modification, protein turnover, chaperones	Xylanase inhibitor N-terminal	Probable aspartyl protease At4g16563 OS=Arabidopsis thaliana OX=3702 GN=At4g16563 PE=2 SV=1	O	Posttranslational modification, protein turnover, chaperones	PREDICTED: probable aspartyl protease At4g16563 [Nelumbo nucifera]
Nn2g14291	Nn2g14291	12.6393	713	10.5507	573	10.3964	701	3.82925	220	1.81145	103	4.32497	296	0	0	0	0	0	0	6.96e-05	-1.50627	down	9.5e-20	-9.99579	down	2.11e-17	7.15098	up	--	--	--	--	--	--	--	--	--	--	--	PREDICTED: uncharacterized protein LOC104601385 isoform X3 [Nelumbo nucifera]
Nn2g14292	Nn2g14292	4.94035	207	4.82403	196	2.48849	120	26.4803	1052	31.5401	1498	19.9576	909	55.586	2472	70.85	2862	35.1	1501	7.51e-19	2.72267	up	3.25e-28	4.09857	up	0.000125447	-1.32918	down	[I]	Lipid transport and metabolism	--	K13699|3.2e-07|bvg:104887726|K13699 abhydrolase domain-containing protein 5 [EC:2.3.1.51] | (RefSeq) probable 1-acylglycerol-3-phosphate O-acyltransferase	--	[R]	General function prediction only	Alpha/beta hydrolase family	Pheophytinase, chloroplastic OS=Arabidopsis thaliana OX=3702 GN=PPH PE=1 SV=1	S	Function unknown	PREDICTED: pheophytinase, chloroplastic [Nelumbo nucifera]
Nn2g14330	Nn2g14330	6.05488	204	5.27259	180	5.7767	222	16.3511	538	16.168	620	16.3325	620	24.5615	887	35.3559	1161	31.3587	1099	5.29e-36	1.64612	up	6.9e-55	2.8289	up	1.18e-10	-1.18374	down	--	--	Cellular Component: nucleus (GO:0005634);; Biological Process: negative regulation of transcription from RNA polymerase III promoter (GO:0016480);;	--	--	[K]	Transcription	Maf1 regulator	--	K	Transcription	PREDICTED: repressor of RNA polymerase III transcription MAF1 homolog [Nelumbo nucifera]
Nn2g14332	Nn2g14332	6.91975	282	20.1443	795	12.0749	564	178.345	6897	140.896	6512	303.323	13436	0.023102	1	0.048163	2	0.109602	5	1.19e-22	3.90499	up	1.56e-25	-6.93118	down	5.16e-92	10.479	up	--	--	Molecular Function: purine nucleoside transmembrane transporter activity (GO:0015211);; Cellular Component: integral component of membrane (GO:0016021);;	K00850|2.0e-38|cpap:110822059|K00850 6-phosphofructokinase 1 [EC:2.7.1.11] | (RefSeq) ATP-dependent 6-phosphofructokinase 6-like	Glycolysis / Gluconeogenesis (ko00010);; Pentose phosphate pathway (ko00030);; Fructose and mannose metabolism (ko00051);; Galactose metabolism (ko00052);; Carbon metabolism (ko01200);; Biosynthesis of amino acids (ko01230);; RNA degradation (ko03018)	--	--	Purine nucleobase transmembrane transport	Purine permease 1 OS=Arabidopsis thaliana OX=3702 GN=PUP1 PE=1 SV=1	S	Function unknown	PREDICTED: purine permease 3-like [Nelumbo nucifera]
Nn2g14333	Nn2g14333	1.68294	69	6.26456	248	3.51383	164	83.7122	3238	79.6912	3683	104.687	4637	0.07824	4	0	0	0	0	2.67e-29	4.4362	up	6.71e-11	-5.91335	down	1.29e-80	10.1186	up	--	--	Molecular Function: purine nucleoside transmembrane transporter activity (GO:0015211);; Cellular Component: integral component of membrane (GO:0016021);;	K00850|1.4e-39|cpap:110822059|K00850 6-phosphofructokinase 1 [EC:2.7.1.11] | (RefSeq) ATP-dependent 6-phosphofructokinase 6-like	Glycolysis / Gluconeogenesis (ko00010);; Pentose phosphate pathway (ko00030);; Fructose and mannose metabolism (ko00051);; Galactose metabolism (ko00052);; Carbon metabolism (ko01200);; Biosynthesis of amino acids (ko01230);; RNA degradation (ko03018)	--	--	Purine nucleobase transmembrane transport	Purine permease 1 OS=Arabidopsis thaliana OX=3702 GN=PUP1 PE=1 SV=1	--	--	PREDICTED: purine permease 1-like [Nelumbo nucifera]
Nn2g14335	Nn2g14335	3.69496	311	1.48324	122	2.31035	225	9.66152	771	15.2342	1462	6.2711	576	26.8693	2406	33.1664	2698	24.9648	2153	2.24e-07	2.0971	up	1.25e-32	3.89833	up	3.07e-06	-1.70293	down	--	--	--	--	--	--	--	Fantastic Four meristem regulator	Protein FAF-like, chloroplastic OS=Arabidopsis thaliana OX=3702 GN=At5g22090 PE=2 SV=1	S	Function unknown	PREDICTED: protein FAF-like, chloroplastic [Nelumbo nucifera]
Nn2g14346	Nn2g14346	7.04255	134	7.64782	141	11.1892	196	34.9401	629	15.8026	345	32.4264	670	44.521	896	61.8124	1130	52.4179	998	8.86e-09	1.87422	up	2.45e-54	3.13843	up	0.000616314	-1.19692	down	[O]	Posttranslational modification, protein turnover, chaperones	Cellular Component: cellular_component (GO:0005575);; Cellular Component: intracellular (GO:0005622);; Cellular Component: cell (GO:0005623);; Cellular Component: nucleus (GO:0005634);; Cellular Component: cytoplasm (GO:0005737);; Cellular Component: chloroplast (GO:0009507);; Cellular Component: plastid (GO:0009536);; Cellular Component: organelle (GO:0043226);; Cellular Component: membrane-boun…	K03686|8.1e-14|lja:Lj3g3v0044290.1|K03686 molecular chaperone DnaJ | (RefSeq) Lj3g3v0044290.1; -	--	[O]	Posttranslational modification, protein turnover, chaperones	DnaJ domain	Chaperone protein dnaJ 11, chloroplastic OS=Arabidopsis thaliana OX=3702 GN=ATJ11 PE=1 SV=2	O	Posttranslational modification, protein turnover, chaperones	PREDICTED: chaperone protein dnaJ 11, chloroplastic [Nelumbo nucifera]
Nn2g14348	Nn2g14348	11.5037	201	12.2257	207	9.29503	187	3.62999	61	4.20566	84	4.42278	85	0.541797	11	0.690278	12	0.788426	15	2.78e-07	-1.2669	down	3.19e-24	-3.48561	down	5.48e-08	2.14967	up	--	--	Biological Process: multicellular organism development (GO:0007275);; Biological Process: biological_process (GO:0008150);; Biological Process: multicellular organismal process (GO:0032501);; Biological Process: developmental process (GO:0032502);; Biological Process: anatomical structure development (GO:0048856);;	--	--	--	--	--	F-box/LRR-repeat MAX2 homolog A OS=Petunia hybrida OX=4102 GN=MAX2A PE=1 SV=1	S	Function unknown	PREDICTED: F-box/LRR-repeat MAX2 homolog A-like [Nelumbo nucifera]
Nn2g14427	Nn2g14427	9.66192	1476	11.4196	1691	7.86542	1378	1.29008	188	1.04729	182	1.57609	262	0.234799	39	0.193804	29	0.262007	41	4.29e-34	-2.72338	down	1.73e-81	-4.9144	down	3.8e-12	2.12929	up	--	--	Molecular Function: microtubule motor activity (GO:0003777);; Molecular Function: ATP binding (GO:0005524);; Biological Process: microtubule-based movement (GO:0007018);; Molecular Function: microtubule binding (GO:0008017);;	K10400|0.0e+00|nnu:104601470|K10400 kinesin family member 15 | (RefSeq) kinesin-like protein KIN-12E	--	[Z]	Cytoskeleton	Kinesin motor domain	Kinesin-like protein KIN-12E OS=Arabidopsis thaliana OX=3702 GN=KIN12E PE=3 SV=1	Z	Cytoskeleton	PREDICTED: kinesin-like protein KIN-12E [Nelumbo nucifera]
Nn2g14443	Nn2g14443	300.32	3955	297.028	3767	242.609	3623	16.8174	209	7.64354	112	16.2327	226	0.517414	9	1.63089	22	0.62696	10	2.68e-49	-4.16558	down	5.04e-125	-7.58273	down	1.23e-09	3.16945	up	--	--	Cellular Component: nucleosome (GO:0000786);; Molecular Function: DNA binding (GO:0003677);; Cellular Component: nucleus (GO:0005634);; Molecular Function: protein heterodimerization activity (GO:0046982);;	K11253|7.0e-51|adu:107470357|K11253 histone H3 | (RefSeq) histone H3.2	--	[B]	Chromatin structure and dynamics	Core histone H2A/H2B/H3/H4	Histone H3.2 OS=Arabidopsis thaliana OX=3702 GN=HTR2 PE=1 SV=2	B	Chromatin structure and dynamics	hypothetical protein FH972_002284 [Carpinus fangiana]
Nn2g14449	Nn2g14449	6.32169	195	6.67696	192	6.3609	213	18.4525	515	25.3717	848	15.8966	545	40.3144	1269	30.4206	848	53.7932	1630	5.01e-15	1.73359	up	3.22e-34	3.06644	up	2.02e-05	-1.31248	down	[T]	Signal transduction mechanisms	Molecular Function: nucleotide binding (GO:0000166);; Molecular Function: molecular_function (GO:0003674);; Molecular Function: binding (GO:0005488);; Cellular Component: cellular_component (GO:0005575);; Cellular Component: cell (GO:0005623);; Cellular Component: plasma membrane (GO:0005886);; Molecular Function: drug binding (GO:0008144);; Cellular Component: membrane (GO:0016020);; Molecular F…	--	--	--	--	Universal stress protein family	Universal stress protein A-like protein OS=Arabidopsis thaliana OX=3702 GN=At3g01520 PE=1 SV=2	T	Signal transduction mechanisms	PREDICTED: universal stress protein A-like protein isoform X1 [Nelumbo nucifera]
Nn2g14524	Nn2g14524	3.06219	159	3.24768	165	3.07047	184	5.73502	284	6.23567	366	7.10275	402	0.4539	26	1.38718	70	0.596383	32	2.92e-10	1.13226	up	0.00111671	-1.48781	down	2.79e-09	2.54259	up	[C]	Energy production and conversion	Molecular Function: oxidoreductase activity (GO:0016491);;	K13606|5.9e-200|nnu:104604139|K13606 chlorophyll(ide) b reductase [EC:1.1.1.294] | (RefSeq) chlorophyll(ide) b reductase NOL, chloroplastic	Porphyrin and chlorophyll metabolism (ko00860)	[R]	General function prediction only	short chain dehydrogenase	Chlorophyll(ide) b reductase NOL, chloroplastic OS=Arabidopsis thaliana OX=3702 GN=NOL PE=1 SV=1	Q	Secondary metabolites biosynthesis, transport and catabolism	PREDICTED: chlorophyll(ide) b reductase NOL, chloroplastic [Nelumbo nucifera]
Nn2g14567	Nn2g14567	11.3805	1270	14.2958	1547	8.74271	1119	4.68938	497	2.7342	347	4.99092	606	0.189792	23	0.303541	33	0.358016	41	8.12e-06	-1.32072	down	1.02e-54	-4.86466	down	1.44e-21	3.44469	up	--	--	Cellular Component: integral component of membrane (GO:0016021);;	--	--	--	--	Plant phosphoribosyltransferase C-terminal	Protein QUIRKY OS=Arabidopsis thaliana OX=3702 GN=QKY PE=2 SV=1	S	Function unknown	PREDICTED: protein QUIRKY [Nelumbo nucifera]
[truncated: 978 more rows]
