# Supplementary material for: Comparative transcriptomic analysis provides insight into carpel petaloidy in lotus (Nelumbo nucifera)
Source: PeerJ. 2021 Oct 25;9:e12322. doi: 10.7717/peerj.12322 (PMC8552788; doi:10.7717/peerj.12322)
Supplement: Supplemental Information 12 [file peerj-09-12322-s012.xlsx]

## Sheet: Data of qRT-PCR
Nn4g23831	Replicate_1	Replicate_2	Replicate_3	Mean	SD
C	0.9659	1.0792	0.9659	1.0037	0.0654
Cp	6.8211	6.5887	4.2281	5.8793	1.4347
P	0.1224	0.0583	0.0319	0.0709	0.0466
Nn2g14034	Replicate_1	Replicate_2	Replicate_3	Mean	SD
C	0.9727	0.9659	1.0644	1.001	0.055
Cp	2.7321	2.2658	3.0105	2.6694	0.3763
P	0.0128	0.0083	0.0158	0.0123	0.0038
Nn3g21830	Replicate_1	Replicate_2	Replicate_3	Mean	SD
C	1.1567	1.2834	0.6783	1.0395	0.3191
Cp	7.1107	6.8211	7.3107	7.0808	0.2462
P	0.23	0.2161	0.2176	0.2213	0.0076
Nn2g10308	Replicate_1	Replicate_2	Replicate_3	Mean	SD
C	0.9202	1.0425	1.0353	0.9993	0.0686
Cp	155.417	149.086	152.219	152.24	3.1656
P	0.4665	0.4601	0.1349	0.3538	0.1896
Nn2g10859	Replicate_1	Replicate_2	Replicate_3	Mean	SD
C	1.021	0.8123	1.2058	1.013	0.1969
Cp	0.2117	0.1843	0.2398	0.2119	0.0278
P	0.8645	0.4005	0.669	0.6447	0.233
Nn2g13182	Replicate_1	Replicate_2	Replicate_3	Mean	SD
C	1.2058	1.014	0.8236	1.0145	0.1911
Cp	4.5948	4.9588	4.8568	4.8035	0.1878
P	0.0229	0.0625	0.0567	0.0474	0.0214
Nn3g18926	Replicate_1	Replicate_2	Replicate_3	Mean	SD
C	1.1096	1.0425	0.8586	1.0035	0.13
Cp	0.3978	0.5322	0.473	0.4677	0.0674
P	N/A	0.0001	0.0004	N/A	N/A
Nn2g13807	Replicate_1	Replicate_2	Replicate_3	Mean	SD
C	0.9931	0.9794	1.021	0.9978	0.0212
Cp	2.2974	2.7321	2.5315	2.5203	0.2176
P	0.0427	0.0087	0.0286	0.0267	0.0171
Nn2g11466	Replicate_1	Replicate_2	Replicate_3	Mean	SD
C	0.9309	1.0521	0.9117	0.9649	0.0761
Cp	3.4822	1.1567	3.5554	2.7314	1.3642
P	3.1821	0.9862	3.8906	2.6863	1.5143
Nn2g11602	Replicate_1	Replicate_2	Replicate_3	Mean	SD
C	0.9727	1.0425	0.9862	1.0005	0.037
Cp	48.1679	48.8403	50.5626	49.1903	1.2351
P	0.0337	0.031	0.039	0.0346	0.0041
Nn4g22107	Replicate_1	Replicate_2	Replicate_3	Mean	SD
C	0.9659	0.9794	1.057	1.0008	0.0492
Cp	9.3827	8.1681	9.3179	8.9562	0.6833
P	0.015	0.0229	0.0797	0.0392	0.0353
Nn2g15879	Replicate_1	Replicate_2	Replicate_3	Mean	SD
C	1.1251	1.0792	0.8236	1.0093	0.1624
Cp	2.1886	2.6759	2.4794	2.448	0.2452
P	0.0382	0.0364	0.0591	0.0446	0.0126
Nn5g30798	Replicate_1	Replicate_2	Replicate_3	Mean	SD
C	1	1.0497	0.9526	1.0008	0.0485
Cp	37.2715	34.0598	30.2738	33.8684	3.5027
P	0.9862	1.5911	1.6818	1.4197	0.3781
Nn3g18142	Replicate_1	Replicate_2	Replicate_3	Mean	SD
C	0.9862	0.9461	1.0718	1.0014	0.0642
Cp	14.8254	13.3614	3.3173	10.5014	6.2645
P	0.0031	0.0069	0.004	0.0047	0.002
Nn3g20982	Replicate_1	Replicate_2	Replicate_3	Mean	SD
C	0.9526	1.0644	0.9862	1.0011	0.0573
Cp	0.3078	0.2755	0.2736	0.2856	0.0192
P	0.0002	0.0006	0.0001	0.0003	0.0003
